# Supplementary material for: Trimethylaluminum-mediated one-pot peptide elongation
Source: Royal Society of Chemistry journal article supplement (doi:10.1039/d3sc00208j), 2023-01-01

Electronic supplementary information for  
**Trimethylaluminum-Mediated One-Pot Peptide Elongation**

Tomohiro Hattori\*, Hisashi Yamamoto\*

Correspondence to: [thattori@isc.chubu.ac.jp](mailto:thattori@isc.chubu.ac.jp); [hyamamoto@isc.chubu.ac.jp](mailto:hyamamoto@isc.chubu.ac.jp)

## Contents

|                                                                         |     |
|-------------------------------------------------------------------------|-----|
| 1. General Information.....                                             | S3  |
| 2. Neutralization of Amino Acid <i>tert</i> -Butyl Ester HCl Salts..... | S4  |
| 3. Preparation of Fmoc-L-Ala-Cl and Fmoc-L-Val-Cl.....                  | S5  |
| 4. Optimization for Dipeptide Synthesis.....                            | S6  |
| 5. General Procedure of One-Pot Tripeptide Synthesis.....               | S7  |
| 6. General Procedure of One-Pot Tetrapeptide Synthesis.....             | S40 |
| 7. Procedure for Pentapeptide Synthesis.....                            | S44 |
| 7.1 Pentapeptide Synthesis.....                                         | S44 |
| 7.2 One-Pot Pentapeptide Synthesis.....                                 | S45 |
| 8. Procedure for Time Course of Gas Generation.....                     | S51 |
| 9. HPLC Data.....                                                       | S52 |
| 10. NMR Data.....                                                       | S56 |

## 1. General Information

NMR spectra were recorded on a JEOL 400SS spectrometer operating at 400 MHz and 100 MHz for  $^1\text{H}$  and  $^{13}\text{C}$  acquisitions, respectively. Chemical shifts are reported in ppm with a solvent resonance as an internal standard ( $^1\text{H}$  NMR; tetramethylsilane as internal standard, indicating 0 ppm,  $^{13}\text{C}$  NMR; chloroform as internal standard, indicating 77.0 ppm). Data is reported as follows: s = singlet, br = broad, d = doublet, t = triplet, q = quartet, quin = quintet, m = multiplet; coupling constants in Hz; integration. FT-IR spectra were recorded with a Bruker ALPHA (Eco-ATR) spectrometer. Specific rotation was measured with an ATAGO AP-300 digital polarimeter. MS spectra were recorded with a Bruker micrOTOF-12 mass spectrometer with electrospray ionization time-of flight (ESI-TOF) for HRMS measurements. TLC analysis was performed on commercial glass plates bearing a 0.25 mm layer of Merck KGaA TLC silica gel 60 F<sub>254</sub>. Silica gel chromatography was conducted with silica gel 60N (KANTO CHEMICAL, spherical, neutral, 40-50 or 63-210  $\mu\text{m}$ ).

*Solvent*; Anhydrous  $\text{CH}_2\text{Cl}_2$  was dried with Glass Contour solvent purification system.

*Chemical*; Amino acids and their derivatives were purchased from Watanabe Chemical Ind., Ltd. and Tokyo Chemical Industry Co. Ltd (TCI) and Sigma-Aldrich. Trimethylaluminum 2M in Hexane (Sigma-Aldrich), Trifluoromethanesulfonic Acid (TCI), Thionyl Chloride (Fujifilm Wako Pure Chemical Corporation).

### *Caution*

*Although trimethylaluminum is a pyrophoric combustible reagent, it is hardly hazardous because of the hexane solution was used.*

*While, close attention should be paid for using in plants scale.*

## 2. Neutralization of Amino Acid *tert*-Butyl Ester HCl Salts

A flame-dried 300 mL round-bottom flask with a magnetic stirring bar was charged with amino acid *tert*-butyl ester HCl salt (5 g), Amberlyst A21 (10 g), and dichloromethane. The resulting mixture was stirred at room temperature for 4 h, and filtered through a glass filter with dichloromethane. Then the filtrate was concentrated in *vacuo* in a water bath (>70 Torr, without heating), and the residue was transferred into 30 mL vials using a pipette, and further concentrated in *vacuo* at ambient temperature for 4 h. The free amines were stored in a freezer.

### 3. Preparation of Fmoc-L-Ala-Cl and Fmoc-L-Val-Cl

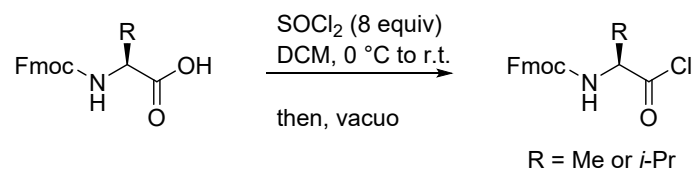

To a solution of Fmoc-L-Ala-OH (311 mg, 1.00 mmol) or Fmoc-L-Val-OH (339 mg, 1.00 mmol) in DCM (7.00 mL),  $\text{SOCl}_2$  (0.58 mL, 8.00 mmol) was added slowly under  $\text{N}_2$  atmosphere at  $0^\circ\text{C}$ . Then, the mixture was vigorously stirred at room temperature. After 3 h, the solvent and excess  $\text{SOCl}_2$  were removed under vacuum. DCM (10 mL) was added again and evaporated to completely remove  $\text{SOCl}_2$ . The crude product was washed with DCM to give the Fmoc-L-Ala-Cl or Fmoc-L-Val-OH as a white solid, which was used directly without further purification.

The product was too unstable to be stored for more than 12 h.

#### 4. Optimization for Dipeptide Synthesis

Table S: Effects of Additives for Dipeptide Synthesis

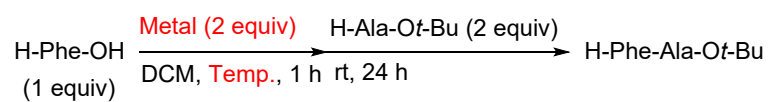

| Metal (2 equiv)                 | Temp. (°C) | Yield (%)                                  |
|---------------------------------|------------|--------------------------------------------|
| ZnMe <sub>2</sub>               | r.t.       | trace                                      |
| Ti(O <i>i</i> -Pr) <sub>4</sub> | r.t.       | trace<br>H-Phe-O <i>i</i> -Pr was observed |
| TiCl <sub>4</sub>               | r.t.       | trace                                      |
| MgCl <sub>2</sub>               | r.t.       | trace                                      |
| ZrCl <sub>4</sub>               | r.t.       | trace                                      |
| DIBAL                           | r.t.       | trace                                      |
| Et <sub>2</sub> AlCl            | r.t.       | trace                                      |
| AlMe <sub>3</sub>               | r.t.       | 67%                                        |
| AlEt <sub>3</sub>               | r.t.       | 55%                                        |
| Al( <i>i</i> -Bu) <sub>3</sub>  | r.t.       | 12%                                        |
| AlMe <sub>3</sub>               | 50 °C      | 57%                                        |
| AlMe <sub>3</sub>               | 0 °C       | 77%                                        |

## 5. General Procedure for One-Pot Tripeptide Synthesis

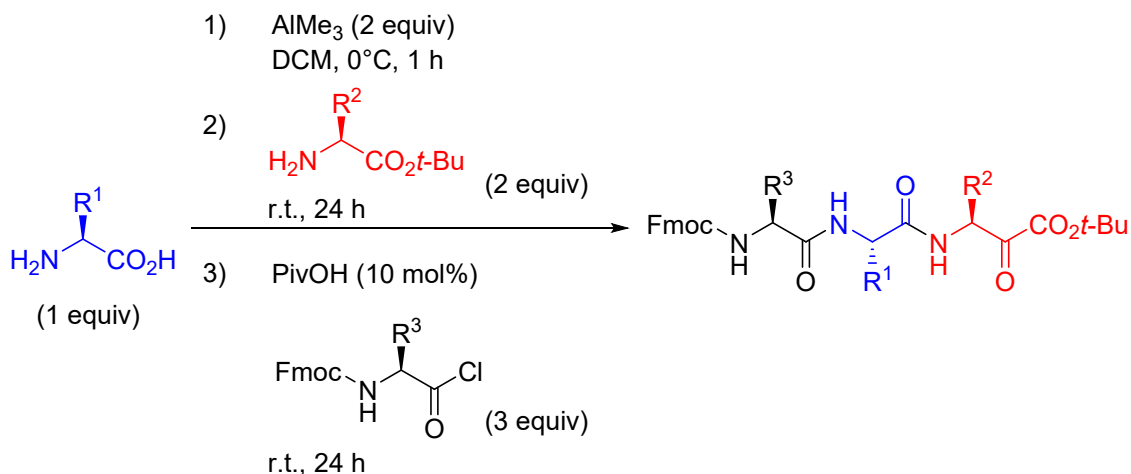

**General procedure 1:** A mixture of L-amino acid (0.250 mmol), trimethylaluminum 2M in hexane (250  $\mu\text{L}$ , 0.500 mmol), and dry DCM (1 mL) in a flame-dried 20 mL test tube equipped with a magnetic stirring bar was stirred vigorously for 1 h at  $0^\circ\text{C}$  under  $\text{N}_2$  atmosphere. Then, L-amino acid *tert*-butyl ester (0.500 mmol) was added to the above reaction solution, and the mixture was allowed to stir vigorously under  $\text{N}_2$  atmosphere at room temperature. After 24 h, Fmoc-L-amino acid chloride and pivalic acid (2.55 mg, 0.025 mmol) were added to the reaction solution, and stirring was continued under  $\text{N}_2$  atmosphere at room temperature for another 24 h. The reaction mixture was then diluted with  $\text{CHCl}_3$  (4.50 mL) and transferred to a  $\text{SiO}_2$  column using a pipette; the used test tube and pipette were washed with  $\text{CHCl}_3$  (2 x 4.00 mL). The reaction mixture was purified by flash column chromatography (50–100% EtOAc in hexane) to provide the corresponding tripeptide as a white solid.

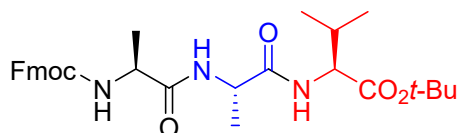

**Fmoc-L-Ala-L-Ala-L-Val-Ot-Bu (5a)** was prepared following **General Procedure 1** using H-L-Ala-OH (22.3 mg, 0.250 mmol) and trimethylaluminum 2M in hexane (250  $\mu\text{L}$ , 0.500 mmol), the resulting mixture was stirred in DCM under  $\text{N}_2$  atmosphere at  $0^\circ\text{C}$ . After 1 h, L-Val-Ot-Bu (86.6 mg, 0.500 mmol) was added. The mixture was stirred under  $\text{N}_2$  atmosphere at ambient temperature. After 24 h, Fmoc-L-Ala-Cl (247 mg, 0.750 mmol) and pivalic acid (2.55 mg, 0.025 mmol) were added into the reaction solution and stirring under  $\text{N}_2$  atmosphere at room temperature for 24 h. The reaction mixture was purified by flash column chromatography (56% AcOEt in hexane) to provide the title

compound as a white solid in 93% yield with >20:1 dr (125 mg).

Gram-scale synthesis;

A mixture of H-L-Ala-OH (265 mg, 3.00 mmol), trimethylaluminum 2M in hexane (3.00 mL, 6.00 mmol), and dry DCM (10 mL) in a flame-dried 50 mL flask equipped with a magnetic stirring bar was stirred vigorously for 1 h at 0 °C under N<sub>2</sub> atmosphere. Then, L-Val-O*t*-Bu (1.04 g, 6.00 mmol) was added to the above reaction solution. The mixture was allowed to stir vigorously under N<sub>2</sub> atmosphere at room temperature. After 24 h, Fmoc-L-Ala-Cl (2.96 g, 9.00 mmol) and pivalic acid (30.6 mg, 0.300 mmol) were added to the reaction solution, and stirring was continued under N<sub>2</sub> atmosphere at room temperature for 24 h. The reaction mixture was then diluted with CHCl<sub>3</sub> (7.50 mL), transferred onto SiO<sub>2</sub> column using a pipette, and the used test tube and pipette were washed with CHCl<sub>3</sub> (2 x 4.00 mL). The reaction mixture was purified by flash column chromatography (56% AcOEt in hexane) to provide the title compound as a white solid in 81% yield with >20:1 dr (1.31 g).

R<sub>f</sub> = 0.35 (50% AcOEt in hexane). M.p. 175–180 °C. [ $\alpha$ ]<sub>D</sub><sup>22</sup> = -32.4 (*c* 1.05, CHCl<sub>3</sub>). <sup>1</sup>H NMR (400 MHz, CDCl<sub>3</sub>)  $\delta$  7.74 (d, *J* = 7.6 Hz, 2H, C<sub>12</sub>H<sub>8</sub>CHCH<sub>2</sub>OCONH), 7.58 (d, *J* = 7.6 Hz, 2H, C<sub>12</sub>H<sub>8</sub>CHCH<sub>2</sub>OCONH), 7.38 (t, *J* = 7.6 Hz, 1H, C<sub>12</sub>H<sub>8</sub>CHCH<sub>2</sub>OCONH), 7.31–7.26 (m, 2H, C<sub>12</sub>H<sub>8</sub>CHCH<sub>2</sub>OCONH), 6.93 (br d, *J* = 6.9 Hz, 1H, NH), 6.85 (br d, *J* = 8.2 Hz, 1H, NH), 5.74 (br d, *J* = 7.3 Hz, 1H, NH), 4.63 (quin, *J* = 7.1 Hz, 1H, CHCH<sub>3</sub>), 4.43–4.36 (m, 4H, CHCH<sub>3</sub> and CHCH(CH<sub>3</sub>)<sub>2</sub> and C<sub>12</sub>H<sub>8</sub>CHCH<sub>2</sub>OCONHCHCH<sub>3</sub>), 4.20 (t, *J* = 7.1 Hz, 1H, C<sub>12</sub>H<sub>8</sub>CHCH<sub>2</sub>OCONH), 2.18–2.10 (m, 1H, CHCH(CH<sub>3</sub>)<sub>2</sub>), 1.45 (s, 9H, CO<sub>2</sub>C(CH<sub>3</sub>)<sub>3</sub>), 1.40–1.38 (m, 6H, CHCH<sub>2</sub> and CHCH<sub>3</sub>), 0.89 (d, *J* = 8.0 Hz, 3H, CHCH(CH<sub>3</sub>)<sub>2</sub>), 0.87 (d, *J* = 8.0 Hz, 3H, CHCH(CH<sub>3</sub>)<sub>2</sub>). <sup>13</sup>C NMR (100 MHz, CDCl<sub>3</sub>)  $\delta$  172.2, 171.7, 170.7, 155.9, 143.8(2C), 141.3(2C), 127.7(2C), 127.0(2C), 125.1(2C), 119.9(2C), 82.0, 67.1, 57.5, 50.4, 48.9, 47.1, 31.3, 28.0 (3C), 19.1, 18.8, 18.3, 17.6. IR (thin film, cm<sup>-1</sup>) 3304, 3066, 2974, 2934, 1732, 1703, 1674, 1637, 1516, 1449, 1393, 1369, 1310, 1253, 1218, 1149, 1108, 1049, 756. HRMS (ESI) calculated for C<sub>30</sub>H<sub>39</sub>N<sub>3</sub>O<sub>6</sub>Na [M+Na]<sup>+</sup> *m/z* 560.2691, found 560.2736.

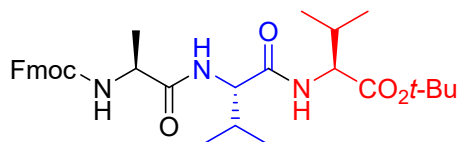

**Fmoc-L-Ala-L-Val-L-Val-O*t*-Bu (5b)** was prepared following **General Procedure 1** using H-L-Val-OH (29.3 mg, 0.250 mmol) and trimethylaluminum 2M in hexane (250  $\mu$ L, 0.500 mmol), the resulting mixture was stirred in DCM under N<sub>2</sub> atmosphere at 0 °C. After 1 h, L-Val-O*t*-Bu (86.6 mg, 0.500 mmol) was added. The mixture was stirred under N<sub>2</sub> atmosphere at ambient temperature. After



24 h, Fmoc-L-Ala-Cl (247 mg, 0.750 mmol) and pivalic acid (2.55 mg, 0.025 mmol) were added into the reaction solution and stirring under N<sub>2</sub> atmosphere at room temperature for 24 h. The reaction mixture was purified by flash column chromatography (35% AcOEt in hexane) to provide the title compound as a white solid in 88% yield with >20:1 dr (124 mg).

R<sub>f</sub> = 0.49 (40% AcOEt in hexane). M.p. 165–170 °C. [α]<sub>D</sub><sup>22</sup> = –35.4 (*c* 1.01, CHCl<sub>3</sub>). <sup>1</sup>H NMR (400 MHz, CDCl<sub>3</sub>) δ 7.73 (d, *J* = 7.4 Hz, 2H, C<sub>12</sub>H<sub>8</sub>CHCH<sub>2</sub>OCONH), 7.58 (d, *J* = 7.6 Hz, 2H, C<sub>12</sub>H<sub>8</sub>CHCH<sub>2</sub>OCONH), 7.36 (t, *J* = 7.6 Hz, 2H, C<sub>12</sub>H<sub>8</sub>CHCH<sub>2</sub>OCONH), 7.28–7.24 (m, 2H, C<sub>12</sub>H<sub>8</sub>CHCH<sub>2</sub>OCONH), 7.19 (br d, *J* = 8.7 Hz, 1H, NH), 7.10 (br d, *J* = 8.7 Hz, 1H, NH), 6.19 (br d, *J* = 8.0 Hz, 1H, NH), 4.55–4.47 (m, 3H, CHCH<sub>3</sub> and CHCH(CH<sub>3</sub>)<sub>2</sub> and CHCH(CH<sub>3</sub>)<sub>2</sub>), 4.39–4.29 (m, 2H, C<sub>12</sub>H<sub>8</sub>CHCH<sub>2</sub>OCONH), 4.19 (t, *J* = 7.4 Hz, 1H, C<sub>12</sub>H<sub>8</sub>CHCH<sub>2</sub>OCONH), 2.19–2.00 (m, 2H, CHCH(CH<sub>3</sub>)<sub>2</sub> and CHCH(CH<sub>3</sub>)<sub>2</sub>), 1.43 (s, 9H, CO<sub>2</sub>C(CH<sub>3</sub>)<sub>3</sub>), 1.36 (d, *J* = 6.9 Hz, 3H, CHCH<sub>3</sub>), 0.96 (d, *J* = 6.6 Hz, 3H, CHCH(CH<sub>3</sub>)<sub>2</sub>), 0.93 (d, *J* = 6.6 Hz, 3H, CHCH(CH<sub>3</sub>)<sub>2</sub>), 0.87 (d, *J* = 6.6 Hz, 3H, CHCH(CH<sub>3</sub>)<sub>2</sub>), 0.85 (d, *J* = 6.6 Hz, 3H, CHCH(CH<sub>3</sub>)<sub>2</sub>). <sup>13</sup>C NMR (100 MHz, CDCl<sub>3</sub>) δ 172.7, 171.2, 170.8, 156.0, 143.8(2C), 141.2(2C), 127.6(2C), 127.0(2C), 125.2, 125.1, 119.8(2C), 81.8, 67.1, 58.7, 57.4, 50.3, 47.0, 31.3, 31.1, 27.9(3C), 19.1, 18.9, 18.8, 18.4, 17.6. IR (thin film, cm<sup>-1</sup>) 3301, 3054, 2971, 2931, 1731, 1703, 1674, 1635, 1515, 1444, 1390, 1361, 1301, 1241, 1218, 1149, 1108, 1049, 753. HRMS (ESI) calculated for C<sub>32</sub>H<sub>43</sub>N<sub>3</sub>O<sub>6</sub>Na [M+Na]<sup>+</sup> *m/z* 588.3049, found 588.3059.

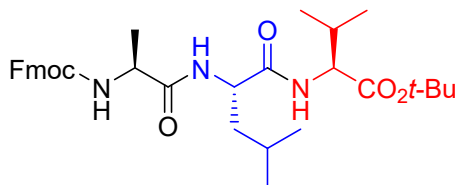

**Fmoc-L-Ala-L-Leu-L-Val-Ot-Bu (5c)** was prepared following **General Procedure 1** using H-L-Leu-OH (32.8 mg, 0.250 mmol) and trimethylaluminum 2M in hexane (250 μL, 0.500 mmol), the resulting mixture was stirred in DCM under N<sub>2</sub> atmosphere at 0 °C. After 1 h, L-Val-Ot-Bu (86.6 mg, 0.500 mmol) was added. The mixture was stirred under N<sub>2</sub> atmosphere at ambient temperature. After 24 h, Fmoc-L-Ala-Cl (247 mg, 0.750 mmol) and pivalic acid (2.55 mg, 0.025 mmol) were added into the reaction solution and stirring under N<sub>2</sub> atmosphere at room temperature for 24 h. The reaction mixture was purified by flash column chromatography (40% AcOEt in hexane) to provide the title compound as a white solid in 91% yield with >20:1 dr (132 mg).

R<sub>f</sub> = 0.66 (50% AcOEt in hexane). M.p. 85–90 °C. [α]<sub>D</sub><sup>20</sup> = +56.8 (*c* 1.20, CHCl<sub>3</sub>). <sup>1</sup>H NMR (400 MHz, CDCl<sub>3</sub>) δ 7.73 (d, *J* = 7.6 Hz, 2H, C<sub>12</sub>H<sub>8</sub>CHCH<sub>2</sub>OCONH), 7.59 (d, *J* = 7.6 Hz, 2H, C<sub>12</sub>H<sub>8</sub>CHCH<sub>2</sub>OCONH), 7.39–7.25 (m, 5H, C<sub>12</sub>H<sub>8</sub>CHCH<sub>2</sub>OCONH and NH), 7.09 (br d, *J* = 8.0 Hz, 1H, NH), 6.18 (br d, *J* = 8.2 Hz, 1H, NH), 4.70 (quin, *J* = 6.9 Hz, 1H, CHCH<sub>3</sub>), 4.51–4.37 (m, 3H, CHCH(CH<sub>3</sub>)<sub>2</sub> and C<sub>12</sub>H<sub>8</sub>CHCH<sub>2</sub>OCONHCHCH<sub>3</sub>), 4.30 (t, *J* = 7.3 Hz, 1H, CHCH<sub>2</sub>CH(CH<sub>3</sub>)<sub>2</sub>), 4.19 (t, *J* = 7.1 Hz, 1H, C<sub>12</sub>H<sub>8</sub>CHCH<sub>2</sub>OCONH), 2.17–2.08 (m, 1H, CHCH(CH<sub>3</sub>)<sub>2</sub>), 1.72–1.48 (m, 3H,

CHCH<sub>2</sub>CH(CH<sub>3</sub>)<sub>2</sub> and CHCH<sub>2</sub>CH(CH<sub>3</sub>)<sub>2</sub>, 1.43 (s, 9H, CO<sub>2</sub>C(CH<sub>3</sub>)<sub>3</sub>), 1.35 (d, *J* = 6.9 Hz, 3H, CHCH<sub>3</sub>), 0.89–0.84 (m, 12H, CHCH(CH<sub>3</sub>)<sub>2</sub> and CHCH<sub>2</sub>CH(CH<sub>3</sub>)<sub>2</sub>). <sup>13</sup>C NMR (100 MHz, CDCl<sub>3</sub>) δ 172.6, 172.1, 170.9, 156.0, 143.9, 143.8, 141.2, 141.1, 127.5(2C), 127.0(2C), 125.3, 125.2, 119.8(2C), 81.7, 67.1, 57.3, 51.8, 50.1, 47.0, 41.2, 31.5, 27.9(3C), 24.6, 22.5, 22.3, 19.1, 18.8, 17.5. IR (thin film, cm<sup>-1</sup>) 3286, 3065, 2962, 2933, 2873, 1705, 1645, 1530, 1449, 1392, 1368, 1312, 1226, 1150, 1109, 1078, 1042, 755. HRMS (ESI) calculated for C<sub>33</sub>H<sub>45</sub>N<sub>3</sub>O<sub>6</sub>Na [M+Na]<sup>+</sup> *m/z* 602.3162, found 602.3206.

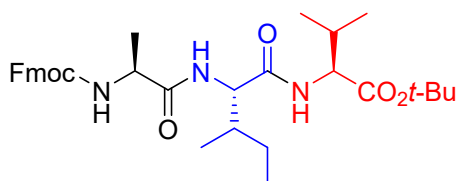

**Fmoc-L-Ala-L-Ile-L-Val-Ot-Bu (5d)** was prepared following **General Procedure 1** using H-L-Ile-OH (32.8 mg, 0.250 mmol) and trimethylaluminum 2M in hexane (250 μL, 0.500 mmol), the resulting mixture was stirred in DCM under N<sub>2</sub> atmosphere at 0 °C. After 1 h, L-Val-Ot-Bu (86.6 mg, 0.500 mmol) was added. The mixture was stirred under N<sub>2</sub> atmosphere at ambient temperature. After 24 h, Fmoc-L-Ala-Cl (247 mg, 0.750 mmol) and pivalic acid (2.55 mg, 0.025 mmol) were added into the reaction solution and stirring under N<sub>2</sub> atmosphere at room temperature for 24 h. The reaction mixture was purified by flash column chromatography (33% AcOEt in hexane) to provide the title compound as a white solid in 86% yield with >20:1 dr (125 mg).

*R*<sub>f</sub> = 0.29 (33% AcOEt in hexane). M.p. 95–100 °C. [α]<sub>D</sub><sup>20</sup> = –50.0 (*c* 1.10, CHCl<sub>3</sub>). <sup>1</sup>H NMR (400 MHz, CDCl<sub>3</sub>) δ 7.71 (d, *J* = 7.6 Hz, 2H, C<sub>12</sub>H<sub>8</sub>CHCH<sub>2</sub>OCONH), 7.59 (d, *J* = 7.6 Hz, 2H, C<sub>12</sub>H<sub>8</sub>CHCH<sub>2</sub>OCONH), 7.49 (br d, *J* = 8.9 Hz, 1H, NH), 7.44 (br d, *J* = 8.7 Hz, 1H, NH), 7.34 (t, *J* = 7.6 Hz, 2H, C<sub>12</sub>H<sub>8</sub>CHCH<sub>2</sub>OCONH), 7.26–7.21 (m, 2H, C<sub>12</sub>H<sub>8</sub>CHCH<sub>2</sub>OCONH), 6.50 (br d, *J* = 8.3 Hz, 1H, NH), 4.66–4.57 (m, 2H, CHCH(CH<sub>3</sub>)CH<sub>2</sub>CH<sub>3</sub> and CHCH<sub>3</sub>), 4.52 (dd, *J* = 5.0 Hz and 8.9 Hz, 1H, CHCH(CH<sub>3</sub>)<sub>2</sub>), 4.38–4.27 (m, 2H, C<sub>12</sub>H<sub>8</sub>CHCH<sub>2</sub>OCONHCHCH<sub>3</sub>), 4.18 (t, *J* = 7.4 Hz, 1H, C<sub>12</sub>H<sub>8</sub>CHCH<sub>2</sub>OCONH), 2.15–2.04 (m, 1H, CHCH(CH<sub>3</sub>)<sub>2</sub>), 1.86–1.77 (m, 1H, CHCH(CH<sub>3</sub>)CH<sub>2</sub>CH<sub>3</sub>), 1.61–1.52 (m, 1H, CHCH(CH<sub>3</sub>)CH<sub>2</sub>CH<sub>3</sub>), 1.40 (s, 9H, CO<sub>2</sub>C(CH<sub>3</sub>)<sub>3</sub>), 1.35 (d, *J* = 7.1 Hz, 3H, CHCH<sub>3</sub>), 1.17–1.06 (m, 1H, CHCH(CH<sub>3</sub>)CH<sub>2</sub>CH<sub>3</sub>), 0.94 (d, *J* = 6.6 Hz, 3H, CHCH(CH<sub>3</sub>)CH<sub>2</sub>CH<sub>3</sub>), 0.88–0.81 (m, 9H, CHCH(CH<sub>3</sub>)<sub>2</sub> and CHCH(CH<sub>3</sub>)CH<sub>2</sub>CH<sub>3</sub>). <sup>13</sup>C NMR (100 MHz, CDCl<sub>3</sub>) δ 172.7, 171.5, 170.8, 156.1, 143.9, 143.8, 141.1 (2C), 127.5(2C), 126.9(2C), 125.2, 125.1, 119.8(2C), 81.6, 67.1, 57.8, 57.4, 50.2, 47.0, 37.3, 31.3, 27.9(3C), 25.1, 19.2, 18.8, 17.6, 15.2, 11.2. IR (thin film, cm<sup>-1</sup>) 3285, 3064, 2965, 2876, 1727, 1703, 1642, 1526, 1449, 1392, 1368, 1252, 1220, 1150, 1109, 1043, 756. HRMS (ESI) calculated for C<sub>33</sub>H<sub>45</sub>N<sub>3</sub>O<sub>6</sub>Na [M+Na]<sup>+</sup> *m/z* 602.3158, found 602.3206.

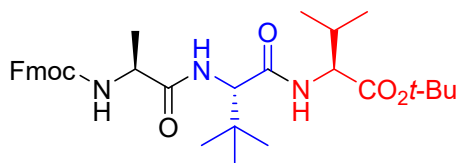

**Fmoc-L-Ala-L-Tle-L-Val-Ot-Bu (5e)** was prepared following **General Procedure 1** using H-L-Tle-OH (32.8 mg, 0.250 mmol) and trimethylaluminum 2M in hexane (250  $\mu$ L, 0.500 mmol), the resulting mixture was stirred in DCM under N<sub>2</sub> atmosphere at 0 °C. After 1 h, L-Val-Ot-Bu (86.6 mg, 0.500 mmol) was added. The mixture was stirred under N<sub>2</sub> atmosphere at ambient temperature. After 24 h, Fmoc-L-Ala-Cl (247 mg, 0.750 mmol) and pivalic acid (2.55 mg, 0.025 mmol) were added into the reaction solution and stirring under N<sub>2</sub> atmosphere at room temperature for 24 h. The reaction mixture was purified by flash column chromatography (33% AcOEt in hexane) to provide the title compound as a white solid in 84% yield with >20:1 dr (122 mg).

R<sub>f</sub> = 0.31 (33% AcOEt in hexane). M.p. 205–210 °C.  $[\alpha]_D^{18} = -30.9$  (*c* 1.10, CHCl<sub>3</sub>). <sup>1</sup>H NMR (400 MHz, CDCl<sub>3</sub>)  $\delta$  7.72 (d, *J* = 7.6 Hz, 2H, C<sub>12</sub>H<sub>8</sub>CHCH<sub>2</sub>OCONH), 7.61 (d, *J* = 7.6 Hz, 2H, C<sub>12</sub>H<sub>8</sub>CHCH<sub>2</sub>OCONH), 7.57 (br d, *J* = 8.9 Hz, 1H, NH), 7.37–7.33 (m, 3H, C<sub>12</sub>H<sub>8</sub>CHCH<sub>2</sub>OCONH and NH), 7.24 (br t, *J* = 7.3 Hz, 2H, C<sub>12</sub>H<sub>8</sub>CHCH<sub>2</sub>OCONH), 6.72 (br d, *J* = 8.7 Hz, 1H, NH), 4.78 (d, *J* = 8.7 Hz, 1H, CH(CH<sub>3</sub>)<sub>3</sub>), 4.67 (quin, *J* = 7.8 Hz, 1H, CHCH<sub>3</sub>), 4.50 (dd, *J* = 5.0 Hz and 8.7 Hz, CHCH(CH<sub>3</sub>)<sub>2</sub>), 4.38–4.28 (m, 2H, C<sub>12</sub>H<sub>8</sub>CHCH<sub>2</sub>OCONHCHCH<sub>3</sub>), 4.20 (t, *J* = 7.6 Hz, 1H, C<sub>12</sub>H<sub>8</sub>CHCH<sub>2</sub>OCONH), 2.10–2.02 (m, 1H, CHCH(CH<sub>3</sub>)<sub>2</sub>), 1.38 (s, 9H, CO<sub>2</sub>C(CH<sub>3</sub>)<sub>3</sub>), 1.35 (d, *J* = 7.8 Hz, 3H, CHCH<sub>3</sub>), 1.03 (s, 9H, CH(CH<sub>3</sub>)<sub>3</sub>), 0.84 (d, *J* = 6.8 Hz, 3H, CHCH(CH<sub>3</sub>)<sub>2</sub>), 0.79 (d, *J* = 6.8 Hz, 3H, CHCH(CH<sub>3</sub>)<sub>2</sub>). <sup>13</sup>C NMR (100 MHz, CDCl<sub>3</sub>)  $\delta$  172.9, 170.9, 170.6, 156.2, 143.9, 143.8, 141.1(2C), 127.5(2C), 126.9(2C), 125.2(2C), 119.7(2C), 81.5, 67.0, 60.3, 57.4, 50.2, 47.0, 34.3, 31.4, 27.9(3C), 26.6(3C), 19.1, 18.8, 17.7. IR (thin film, cm<sup>-1</sup>) 3300, 2966, 1703, 1643, 1523, 1449, 1368, 1252, 1217, 1144, 1078, 753. HRMS (ESI) calculated for C<sub>33</sub>H<sub>45</sub>N<sub>3</sub>O<sub>6</sub>Na [M+Na]<sup>+</sup> *m/z* 602.3174, found 602.3206.

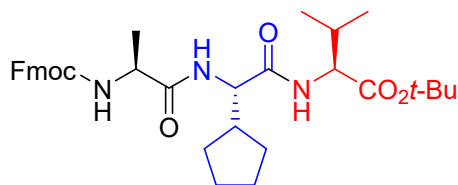

**Fmoc-L-Ala-L-Gly(c-Pent)-L-Val-Ot-Bu (5f)** was prepared following **General Procedure 1** using H-L-Gly(c-Pent)-OH (35.8 mg, 0.250 mmol) and trimethylaluminum 2M in hexane (250  $\mu$ L, 0.500 mmol), the resulting mixture was stirred in DCM under N<sub>2</sub> atmosphere at 0 °C. After 1 h, L-Val-Ot-Bu (86.6 mg, 0.500 mmol) was added. The mixture was stirred under N<sub>2</sub> atmosphere at ambient temperature. After 24 h, Fmoc-L-Ala-Cl (247 mg, 0.750 mmol) and pivalic acid (2.55 mg, 0.025 mmol) were added into the reaction solution and stirring under N<sub>2</sub> atmosphere at room temperature

for 24 h. The reaction mixture was purified by flash column chromatography (45% AcOEt in hexane) to provide the title compound as a white solid in 86% yield with >20:1 dr (127 mg).

$R_f = 0.45$  (50% AcOEt in hexane). M.p. 200–205 °C.  $[\alpha]_D^{18} = -35.9$  ( $c$  1.01,  $\text{CHCl}_3$ ).  $^1\text{H NMR}$  (400 MHz,  $\text{CDCl}_3$ )  $\delta$  7.72 (d,  $J = 7.4$  Hz, 2H,  $\text{C}_{12}\text{H}_8\text{CHCH}_2\text{OCONH}$ ), 7.59 (d,  $J = 7.6$  Hz, 2H,  $\text{C}_{12}\text{H}_8\text{CHCH}_2\text{OCONH}$ ), 7.44 (br d,  $J = 8.7$  Hz, 1H,  $\text{NH}$ ), 7.36 (t,  $J = 7.3$  Hz, 2H,  $\text{C}_{12}\text{H}_8\text{CHCH}_2\text{OCONH}$ ), 7.28–7.23 (m, 2H,  $\text{C}_{12}\text{H}_8\text{CHCH}_2\text{OCONH}$ ), 7.18 (br d,  $J = 8.2$  Hz, 1H,  $\text{NH}$ ), 6.32 (br d,  $J = 8.2$  Hz, 1H,  $\text{NH}$ ), 4.62–4.58 (m, 1H,  $\text{CHCH}(\text{CH}_2\text{CH}_2)_2$ ), 4.53–4.48 (m, 2H,  $\text{CHCH}_3$  and  $\text{CHCH}(\text{CH}_3)_2$ ), 4.39–4.27 (m, 2H,  $\text{C}_{12}\text{H}_8\text{CHCH}_2\text{OCONH}$ ), 4.18 (t,  $J = 7.3$  Hz, 1H,  $\text{C}_{12}\text{H}_8\text{CHCH}_2\text{OCONH}$ ), 2.30–2.09 (m, 2H,  $\text{CHCH}(\text{CH}_2\text{CH}_2)_2$  and  $\text{CHCH}(\text{CH}_3)_2$ ), 1.72–1.66 (m, 2H,  $\text{CHCH}(\text{CH}_2\text{CH}_2)_2$ ), 1.61–1.20 (m, 6H,  $\text{CHCH}(\text{CH}_2\text{CH}_2)_2$  and  $\text{CHCH}(\text{CH}_2\text{CH}_2)_2$ ), 1.43 (s, 9H,  $\text{CO}_2\text{C}(\text{CH}_3)_3$ ), 1.35 (d,  $J = 6.8$  Hz, 3H,  $\text{CHCH}_3$ ), 0.87 (d,  $J = 6.9$  Hz, 3H,  $\text{CHCH}(\text{CH}_3)_2$ ), 0.84 (d,  $J = 6.9$  Hz, 3H,  $\text{CHCH}(\text{CH}_3)_2$ ).  $^{13}\text{C NMR}$  (100 MHz,  $\text{CDCl}_3$ )  $\delta$  172.6, 171.6, 170.9, 156.1, 143.9, 143.8, 141.2(2C), 127.6(2C), 127.0(2C), 125.3, 125.2, 119.8(2C), 81.7, 67.1, 57.3(2C), 50.2, 47.0, 42.3, 31.4, 29.3, 29.1, 27.9(3C), 25.3, 25.0, 19.0, 18.8, 17.5. IR (thin film,  $\text{cm}^{-1}$ ) 3229, 2961, 1705, 1644, 1524, 1444, 1361, 1221, 1217, 1141, 1075, 756. HRMS (ESI) calculated for  $\text{C}_{34}\text{H}_{45}\text{N}_3\text{O}_6\text{Na}$   $[\text{M}+\text{Na}]^+ m/z$  614.3206, found 614.3208.

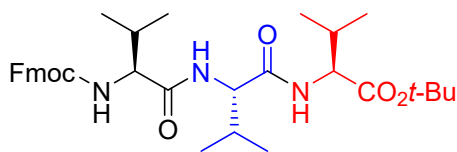

**Fmoc-L-Val-L-Val-L-Val-Ot-Bu (5g)** was prepared following **General Procedure 1** using H-L-Val-OH (29.3 mg, 0.250 mmol) and trimethylaluminum 2M in hexane (250  $\mu\text{L}$ , 0.500 mmol), the resulting mixture was stirred in DCM under  $\text{N}_2$  atmosphere at 0 °C. After 1 h, L-Val-Ot-Bu (86.6 mg, 0.500 mmol) was added. The mixture was stirred under  $\text{N}_2$  atmosphere at ambient temperature. After 24 h, Fmoc-L-Val-Cl (268 mg, 0.750 mmol) and pivalic acid (2.55 mg, 0.025 mmol) were added into the reaction solution and stirring under  $\text{N}_2$  atmosphere at room temperature for 24 h. The reaction mixture was purified by flash column chromatography (35% AcOEt in hexane) to provide the title compound as a white solid in 83% yield with >20:1 dr (123 mg).

$R_f = 0.39$  (33% AcOEt in hexane). M.p. 195–200 °C.  $[\alpha]_D^{22} = -39.4$  ( $c$  1.01,  $\text{CHCl}_3$ ).  $^1\text{H NMR}$  (400 MHz,  $\text{CDCl}_3$ )  $\delta$  7.71 (d,  $J = 7.6$  Hz, 2H,  $\text{C}_{12}\text{H}_8\text{CHCH}_2\text{OCONH}$ ), 7.61–7.51 (m, 3H,  $\text{C}_{12}\text{H}_8\text{CHCH}_2\text{OCONH}$  and  $\text{NH}$ ), 7.36–7.19 (m, 5H,  $\text{C}_{12}\text{H}_8\text{CHCH}_2\text{OCONH}$  and  $\text{NH}$ ), 6.45 (br d,  $J = 9.4$  Hz, 1H,  $\text{NH}$ ), 4.60 (t,  $J = 8.7$  Hz, 1H,  $\text{CHCH}(\text{CH}_3)_2$ ), 4.52 (dd,  $J = 5.0$  Hz and 9.0 Hz, 1H,  $\text{CHCH}(\text{CH}_3)_2$ ), 4.40 (dd,  $J = 7.3$  Hz and 9.4 Hz, 1H,  $\text{CHCH}(\text{CH}_3)_2$ ), 4.25–4.14 (m, 3H,  $\text{C}_{12}\text{H}_8\text{CHCH}_2\text{OCONH}$  and  $\text{C}_{12}\text{H}_8\text{CHCH}_2\text{OCONH}$ ), 2.15–1.99 (m, 3H,  $\text{CHCH}(\text{CH}_3)_2$  and  $\text{CHCH}(\text{CH}_3)_2$  and  $\text{CHCH}(\text{CH}_3)_2$ ), 1.43 (s, 9H,  $\text{CO}_2\text{C}(\text{CH}_3)_3$ ), 0.96–0.83 (m, 18H,  $\text{CHCH}(\text{CH}_3)_2$  and

CHCH(CH<sub>3</sub>)<sub>2</sub> and CHCH(CH<sub>3</sub>)<sub>2</sub>). <sup>13</sup>C NMR (100 MHz, CDCl<sub>3</sub>) δ 171.7, 171.4, 171.0, 156.6, 144.0, 143.9, 141.2, 141.1, 127.5(2C), 127.0(2C), 125.3, 125.2, 119.8(2C), 81.6, 67.0, 60.4, 58.6, 57.3, 47.1, 31.5, 31.3, 30.9, 28.0(3C), 19.1(2C), 18.9, 18.8, 18.4, 17.6. IR (thin film, cm<sup>-1</sup>) 3294, 3061, 2975, 2931, 1735, 1701, 1676, 1634, 1515, 1448, 1393, 1361, 1315, 1255, 1215, 1149, 1105, 1045, 756. HRMS (ESI) calculated for C<sub>34</sub>H<sub>47</sub>N<sub>3</sub>O<sub>6</sub>Na [M+Na]<sup>+</sup> *m/z* 616.3363, found 616.3398.

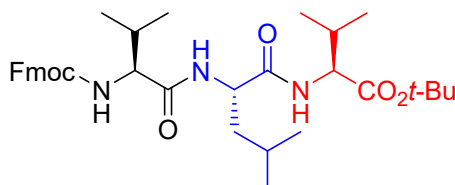

**Fmoc-L-Val-L-Leu-L-Val-Ot-Bu (5h)** was prepared following **General Procedure 1** using H-L-Leu-OH (32.8 mg, 0.250 mmol) and trimethylaluminum 2M in hexane (250 μL, 0.500 mmol), the resulting mixture was stirred in DCM under N<sub>2</sub> atmosphere at 0 °C. After 1 h, L-Val-Ot-Bu (86.6 mg, 0.500 mmol) was added. The mixture was stirred under N<sub>2</sub> atmosphere at ambient temperature. After 24 h, Fmoc-L-Val-Cl (268 mg, 0.750 mmol) and pivalic acid (2.55 mg, 0.025 mmol) were added into the reaction solution and stirring under N<sub>2</sub> atmosphere at room temperature for 24 h. The reaction mixture was purified by flash column chromatography (30% AcOEt in hexane) to provide the title compound as a white solid in 84% yield with >20:1 dr (128 mg).

R<sub>f</sub> = 0.39 (33% AcOEt in hexane). M.p. 205–210 °C. [α]<sub>D</sub><sup>22</sup> = -35.4 (*c* 1.01, CHCl<sub>3</sub>). <sup>1</sup>H NMR (400 MHz, CDCl<sub>3</sub>) δ 7.77–7.62 (m, 5H, C<sub>12</sub>H<sub>8</sub>CHCH<sub>2</sub>OCONH and NH), 7.38–7.23 (m, 5H, C<sub>12</sub>H<sub>8</sub>CHCH<sub>2</sub>OCONH and NH), 6.60 (br d, *J* = 9.4 Hz, 1H, NH), 4.79 (dd., *J* = 7.4 Hz and 15 Hz, CHCH<sub>2</sub>CH(CH<sub>3</sub>)<sub>2</sub>), 4.56 (dd, *J* = 4.8 Hz and 9.2 Hz, 1H, CHCH(CH<sub>3</sub>)<sub>2</sub>), 4.50 (dd, *J* = 5.0 Hz and 8.2 Hz, 1H, CHCH(CH<sub>3</sub>)<sub>2</sub>), 4.22–4.11 (m, 3H, C<sub>12</sub>H<sub>8</sub>CHCH<sub>2</sub>OCONH and C<sub>12</sub>H<sub>8</sub>CHCH<sub>2</sub>OCONH), 2.15–1.99 (m, 2H, CHCH(CH<sub>3</sub>)<sub>2</sub> and CHCH(CH<sub>3</sub>)<sub>2</sub>), 1.73–1.58 (m, 2H, CHCH<sub>2</sub>CH(CH<sub>3</sub>)<sub>2</sub>), 1.49–1.40 (m, 1H, CHCH<sub>2</sub>CH(CH<sub>3</sub>)<sub>2</sub>), 1.40 (s, 9H, CO<sub>2</sub>C(CH<sub>3</sub>)<sub>3</sub>), 0.98–0.79 (m, 18H, CHCH(CH<sub>3</sub>)<sub>2</sub> and CHCH(CH<sub>3</sub>)<sub>2</sub> and CHCH<sub>2</sub>CH(CH<sub>3</sub>)<sub>2</sub>). <sup>13</sup>C NMR (100 MHz, CDCl<sub>3</sub>) δ 172.1, 171.8, 171.2, 156.6, 144.1, 143.8, 141.1(2C), 127.5(2C), 127.0(2C), 125.5, 125.3, 119.7(2C), 81.5, 67.1, 60.2, 57.2, 51.8, 47.1, 41.4, 31.6, 31.4, 27.9(3C), 24.5, 22.7, 22.3, 19.1, 19.0, 18.6, 17.5. IR (thin film, cm<sup>-1</sup>) 3309, 3055, 2971, 1731, 1701, 1673, 1633, 1515, 1445, 1391, 1361, 1310, 1253, 1215, 1144, 1108, 1049, 756. HRMS (ESI) calculated for C<sub>35</sub>H<sub>49</sub>N<sub>3</sub>O<sub>6</sub>Na [M+Na]<sup>+</sup> *m/z* 630.3519, found 630.3493.

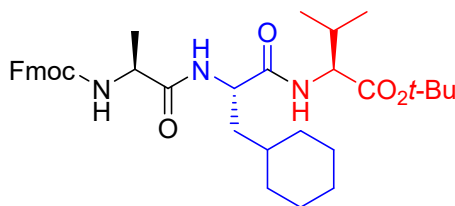

**Fmoc-L-Ala-L-Cha-L-Val-Ot-Bu (5i)** was prepared following **General Procedure 1** using H-L-Cha-OH (42.8 mg, 0.250 mmol) and trimethylaluminum 2M in hexane (250  $\mu$ L, 0.500 mmol), the resulting mixture was stirred in DCM under N<sub>2</sub> atmosphere at 0 °C. After 1 h, L-Val-Ot-Bu (86.6 mg, 0.500 mmol) was added. The mixture was stirred under N<sub>2</sub> atmosphere at ambient temperature. After 24 h, Fmoc-L-Ala-Cl (247 mg, 0.750 mmol) and pivalic acid (2.55 mg, 0.025 mmol) were added into the reaction solution and stirring under N<sub>2</sub> atmosphere at room temperature for 24 h. The reaction mixture was purified by flash column chromatography (40% AcOEt in hexane) to provide the title compound as a white solid in 84% yield with >20:1 dr (130 mg).

R<sub>f</sub> = 0.63 (50% AcOEt in hexane). M.p. 205–210 °C.  $[\alpha]_D^{18} = -35.9$  (*c* 1.05, CHCl<sub>3</sub>). <sup>1</sup>H NMR (400 MHz, CDCl<sub>3</sub>)  $\delta$  7.73 (d, *J* = 6.9 Hz, 2H, C<sub>12</sub>H<sub>8</sub>CHCH<sub>2</sub>OCONH), 7.61–7.58 (m, 2H, C<sub>12</sub>H<sub>8</sub>CHCH<sub>2</sub>OCONH), 7.37 (t, *J* = 7.3 Hz, 2H, C<sub>12</sub>H<sub>8</sub>CHCH<sub>2</sub>OCONH), 7.29–7.26 (m, 2H, C<sub>12</sub>H<sub>8</sub>CHCH<sub>2</sub>OCONH), 7.18 (br d, *J* = 8.9 Hz, 1H, NH), 7.00 (br d, *J* = 7.8 Hz, 1H, NH), 6.07 (d, *J* = 8.0 Hz, 1H, NH), 4.69 (quin., *J* = 7.3 Hz, 1H, CHCH<sub>3</sub>), 4.50–4.39 (m, 3H, C<sub>12</sub>H<sub>8</sub>CHCH<sub>2</sub>OCONH and CHCH(CH<sub>3</sub>)<sub>2</sub>), 4.32–4.27 (m, 1H, CHCH<sub>2</sub>CH(CH<sub>2</sub>CH<sub>2</sub>CH<sub>2</sub>CH<sub>2</sub>CH<sub>2</sub>)), 4.20 (t, *J* = 7.3 Hz, 1H, C<sub>12</sub>H<sub>8</sub>CHCH<sub>2</sub>OCONH), 2.15–2.10 (m, 1H, CHCH(CH<sub>3</sub>)<sub>2</sub>), 1.71–1.00 (m, 11H, CHCH<sub>2</sub>CH(CH<sub>2</sub>CH<sub>2</sub>CH<sub>2</sub>CH<sub>2</sub>CH<sub>2</sub>) and CHCH<sub>2</sub>CH(CH<sub>2</sub>CH<sub>2</sub>CH<sub>2</sub>CH<sub>2</sub>CH<sub>2</sub>) and CHCH<sub>2</sub>CH(CH<sub>2</sub>CH<sub>2</sub>CH<sub>2</sub>CH<sub>2</sub>CH<sub>2</sub>) and CHCH<sub>2</sub>CH(CH<sub>2</sub>CH<sub>2</sub>CH<sub>2</sub>CH<sub>2</sub>CH<sub>2</sub>) and CHCH<sub>2</sub>CH(CH<sub>2</sub>CH<sub>2</sub>CH<sub>2</sub>CH<sub>2</sub>CH<sub>2</sub>)), 1.44 (s, 9H, CO<sub>2</sub>C(CH<sub>3</sub>)<sub>3</sub>), 1.36 (d, *J* = 7.3 Hz, 3H, CHCH<sub>3</sub>), 0.89–0.79 (m, 8H, CHCH(CH<sub>3</sub>)<sub>2</sub> and CHCH<sub>2</sub>CH(CH<sub>2</sub>CH<sub>2</sub>CH<sub>2</sub>CH<sub>2</sub>CH<sub>2</sub>)). <sup>13</sup>C NMR (100 MHz, CDCl<sub>3</sub>)  $\delta$  172.5, 172.0, 170.8, 156.0, 143.8(2C), 141.1(2C), 127.6(2C), 127.0(2C), 125.2, 125.1, 119.8(2C), 81.7, 67.2, 57.3, 51.2, 50.2, 47.0, 39.8, 33.9, 33.2, 32.8, 31.5, 27.9(3C), 26.3, 26.0(2C), 19.1, 18.8, 17.5. IR (thin film, cm<sup>-1</sup>) 3301, 2965, 1705, 1644, 1521, 1449, 1367, 1251, 1215, 1141, 1075, 753. HRMS (ESI) calculated for C<sub>36</sub>H<sub>49</sub>N<sub>3</sub>O<sub>6</sub>Na [M+Na]<sup>+</sup> *m/z* 642.3519, found 642.3492.

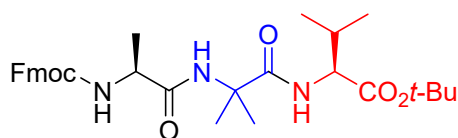

**Fmoc-L-Ala-Aib-L-Val-Ot-Bu (5j)** was prepared following **General Procedure 1** using H-Aib-OH (25.8 mg, 0.250 mmol) and trimethylaluminum 2M in hexane (250  $\mu$ L, 0.500 mmol), the resulting mixture was stirred in DCM under N<sub>2</sub> atmosphere at 0 °C. After 1 h, L-Val-Ot-Bu (86.6 mg, 0.500 mmol) was added. The mixture was stirred under N<sub>2</sub> atmosphere at ambient temperature. After 24 h, Fmoc-L-Ala-Cl (247 mg, 0.750 mmol) and pivalic acid (2.55 mg, 0.025 mmol) were added into the reaction solution and stirring under N<sub>2</sub> atmosphere at room temperature for 24 h. The reaction mixture was purified by flash column chromatography (50% AcOEt in hexane) to provide the title compound as a white solid in 90% yield with >20:1 dr (124 mg).

$R_f = 0.35$  (50% AcOEt in hexane). M.p. 95–100 °C.  $[\alpha]_D^{23} = -105.0$  ( $c$  1.00,  $\text{CHCl}_3$ ).  $^1\text{H NMR}$  (400 MHz,  $\text{CDCl}_3$ )  $\delta$  7.74 (d,  $J = 7.6$  Hz, 2H,  $\text{C}_{12}\text{H}_8\text{CHCH}_2\text{OCONH}$ ), 7.59–7.56 (m, 2H,  $\text{C}_{12}\text{H}_8\text{CHCH}_2\text{OCONH}$ ), 7.39 (t,  $J = 7.3$  Hz, 2H,  $\text{C}_{12}\text{H}_8\text{CHCH}_2\text{OCONH}$ ), 7.31–7.27 (m, 2H,  $\text{C}_{12}\text{H}_8\text{CHCH}_2\text{OCONH}$ ), 6.82–6.79 (m, 2H,  $\text{NH}$  and  $\text{NH}$ ), 5.51 (d,  $J = 7.1$  Hz, 1H,  $\text{NH}$ ), 4.41–4.37 (m, 3H,  $\text{CHCH}_3$  and  $\text{C}_{12}\text{H}_8\text{CHCH}_2\text{OCONH}$ ), 4.22–4.18 (m, 2H,  $\text{CHCH}(\text{CH}_3)_2$  and  $\text{C}_{12}\text{H}_8\text{CHCH}_2\text{OCONH}$ ), 2.22–2.12 (m, 1H,  $\text{CHCH}(\text{CH}_3)_2$ ), 1.59 (s, 3H,  $\text{C}(\text{CH}_3)_2$ ), 1.56 (s, 3H,  $\text{C}(\text{CH}_3)_2$ ), 1.44 (s, 9H,  $\text{CO}_2\text{C}(\text{CH}_3)_3$ ), 1.38 (d,  $J = 6.9$  Hz, 3H,  $\text{CHCH}_3$ ), 0.91 (d,  $J = 6.8$  Hz, 3H,  $\text{CHCH}(\text{CH}_3)_2$ ), 0.87 (d,  $J = 6.8$  Hz, 3H,  $\text{CHCH}(\text{CH}_3)_2$ ).  $^{13}\text{C NMR}$  (100 MHz,  $\text{CDCl}_3$ )  $\delta$  173.8, 171.8, 170.9, 156.0, 143.7, 143.6, 141.2(2C), 127.7(2C), 127.0(2C), 125.0(2C), 119.9(2C), 81.8, 67.1, 57.6, 57.3, 50.9, 47.0, 31.3, 27.9(3C), 25.5, 24.7, 18.8, 18.5, 17.5. IR (thin film,  $\text{cm}^{-1}$ ) 3313, 2973, 2937, 1716, 1668, 1511, 1450, 1390, 1368, 1315, 1245, 1157, 1117, 1077, 1033, 982, 755. HRMS (ESI) calculated for  $\text{C}_{31}\text{H}_{41}\text{N}_3\text{O}_6\text{Na}$   $[\text{M}+\text{Na}]^+$   $m/z$  574.2893, found 574.2880.

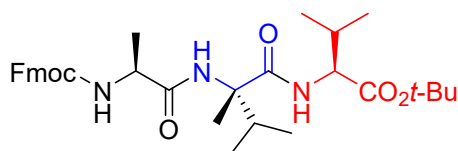

**Fmoc-L-Ala-L-(Me)Val-L-Val-Ot-Bu (5k)** was prepared following **General Procedure 1** using H-L-(Me)Val-OH (32.8 mg, 0.250 mmol) and trimethylaluminum 2M in hexane (250  $\mu\text{L}$ , 0.500 mmol), the resulting mixture was stirred in DCM under  $\text{N}_2$  atmosphere at 0 °C. After 1 h, L-Val-Ot-Bu (86.6 mg, 0.500 mmol) was added. The mixture was stirred under  $\text{N}_2$  atmosphere at ambient temperature. After 24 h, Fmoc-L-Ala-Cl (247 mg, 0.750 mmol) and pivalic acid (2.55 mg, 0.025 mmol) were added into the reaction solution and stirring under  $\text{N}_2$  atmosphere at room temperature for 24 h. The reaction mixture was purified by flash column chromatography (40% AcOEt in hexane) to provide the title compound as a white solid in 81% yield with >20:1 dr (117 mg).

$R_f = 0.59$  (50% AcOEt in hexane). M.p. 205–210 °C.  $[\alpha]_D^{22} = -36.4$  ( $c$  1.01,  $\text{CHCl}_3$ ).  $^1\text{H NMR}$  (400 MHz,  $\text{CDCl}_3$ )  $\delta$  7.74 (d,  $J = 7.6$  Hz, 2H,  $\text{C}_{12}\text{H}_8\text{CHCH}_2\text{OCONH}$ ), 7.56 (d,  $J = 7.6$  Hz, 2H,  $\text{C}_{12}\text{H}_8\text{CHCH}_2\text{OCONH}$ ), 7.39 (t,  $J = 7.3$  Hz, 2H,  $\text{C}_{12}\text{H}_8\text{CHCH}_2\text{OCONH}$ ), 7.31–7.27 (m, 2H,  $\text{C}_{12}\text{H}_8\text{CHCH}_2\text{OCONH}$ ), 7.09 (br d,  $J = 8.5$  Hz, 1H,  $\text{NH}$ ), 6.71 (br s, 1H,  $\text{NH}$ ), 5.55 (d,  $J = 7.4$  Hz, 1H,  $\text{NH}$ ), 4.41–4.18 (m, 5H,  $\text{CHCH}_3$  and  $\text{CHCH}(\text{CH}_3)_2$  and  $\text{C}_{12}\text{H}_8\text{CHCH}_2\text{OCONH}$  and  $\text{C}_{12}\text{H}_8\text{CHCH}_2\text{OCONH}$ ), 2.55–2.46 (m, 1H,  $\text{C}(\text{CH}_3)\text{CH}(\text{CH}_3)_2$ ), 2.24–2.12 (m, 1H,  $\text{CHCH}(\text{CH}_3)_2$ ), 1.47 (s, 3H,  $\text{C}(\text{CH}_3)\text{CH}(\text{CH}_3)_2$ ), 1.44 (s, 9H,  $\text{CO}_2\text{C}(\text{CH}_3)_3$ ), 0.96–0.89 (m, 12H,  $\text{C}(\text{CH}_3)\text{CH}(\text{CH}_3)_2$  and  $\text{CHCH}(\text{CH}_3)_2$ ).  $^{13}\text{C NMR}$  (100 MHz,  $\text{CDCl}_3$ )  $\delta$  173.1, 172.1, 170.8, 156.0, 143.7, 143.6, 141.2(2C), 127.7(2C), 127.0(2C), 125.0(2C), 119.9(2C), 81.7, 67.1, 64.2, 57.8, 50.9, 47.0, 33.5, 31.2, 27.9(3C), 18.9, 18.3, 18.0, 17.6, 17.1, 17.0. IR (thin film,  $\text{cm}^{-1}$ ) 3301, 3065, 2971, 2944, 1721, 1703, 1676, 1635, 1515, 1441, 1393, 1360, 1311, 1251, 1218, 1149, 1107, 1049, 753. HRMS (ESI)

calculated for  $C_{33}H_{45}N_3O_6Na$   $[M+Na]^+$   $m/z$  602.3174, found 602.3186.

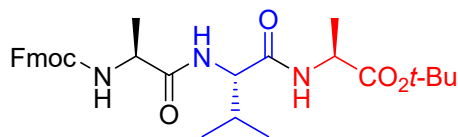

**Fmoc-L-Ala-L-Val-L-Ala-Ot-Bu (5l)** was prepared following **General Procedure 1** using H-L-Val-OH (29.3 mg, 0.250 mmol) and trimethylaluminum 2M in hexane (250  $\mu$ L, 0.500 mmol), the resulting mixture was stirred in DCM under  $N_2$  atmosphere at 0  $^\circ$ C. After 1 h, L-Ala-Ot-Bu (72.6 mg, 0.500 mmol) was added. The mixture was stirred under  $N_2$  atmosphere at ambient temperature. After 24 h, Fmoc-L-Ala-Cl (247 mg, 0.750 mmol) and pivalic acid (2.55 mg, 0.025 mmol) were added into the reaction solution and stirring under  $N_2$  atmosphere at room temperature for 24 h. The reaction mixture was purified by flash column chromatography (45% AcOEt in hexane) to provide the title compound as a white solid in 92% yield with >20:1 dr (124 mg).

$R_f$  = 0.46 (50% AcOEt in hexane). M.p. 170–175  $^\circ$ C.  $[\alpha]_D^{22} = -31.4$  ( $c$  1.03,  $CHCl_3$ ).  $^1H$  NMR (400 MHz,  $CDCl_3$ )  $\delta$  7.74 (d,  $J$  = 7.6 Hz, 2H,  $C_{12}H_8CHCH_2OCONH$ ), 7.57 (d,  $J$  = 7.6 Hz, 2H,  $C_{12}H_8CHCH_2OCONH$ ), 7.38 (t,  $J$  = 7.3 Hz, 1H,  $C_{12}H_8CHCH_2OCONH$ ), 7.30–7.26 (m, 2H,  $C_{12}H_8CHCH_2OCONH$ ), 6.84 (br d,  $J$  = 8.3 Hz, 1H,  $NH$ ), 6.70 (br d,  $J$  = 6.6 Hz, 1H,  $NH$ ), 5.70 (d,  $J$  = 7.3 Hz, 1H,  $NH$ ), 4.48–4.35 (m, 5H,  $CHCH_3$  and  $CHCH_3$  and  $CHCH(CH_3)_2$  and  $C_{12}H_8CHCH_2OCONHCHCH_3$ ), 4.20 (t,  $J$  = 7.1 Hz, 1H,  $C_{12}H_8CHCH_2OCONH$ ), 2.17–2.04 (m, 1H,  $CHCH(CH_3)_2$ ), 1.44 (s, 9H,  $CO_2C(CH_3)_3$ ), 1.39 (d,  $J$  = 6.8 Hz, 3H,  $CHCH_3$ ), 1.33 (d,  $J$  = 7.1 Hz, 3H,  $CHCH_3$ ), 0.95 (d,  $J$  = 6.9 Hz, 3H,  $CHCH(CH_3)_2$ ), 0.92 (d,  $J$  = 6.9 Hz, 3H,  $CHCH(CH_3)_2$ ).  $^{13}C$  NMR (100 MHz,  $CDCl_3$ )  $\delta$  172.4, 171.8, 170.2, 156.0, 143.8, 143.7, 141.2(2C), 127.7(2C), 127.0(2C), 125.1(2C), 120.0(2C), 82.0, 67.1, 58.3, 50.5, 48.7, 47.1, 31.3, 27.9(3C), 19.1, 18.7, 18.4, 18.0. IR (thin film,  $cm^{-1}$ ) 3301, 3065, 2974, 1731, 1705, 1664, 1633, 1515, 1449, 1399, 1369, 1311, 1251, 1212, 1145, 1107, 1045, 756. HRMS (ESI) calculated for  $C_{30}H_{39}N_3O_6Na$   $[M+Na]^+$   $m/z$  560.2691, found 560.2639.

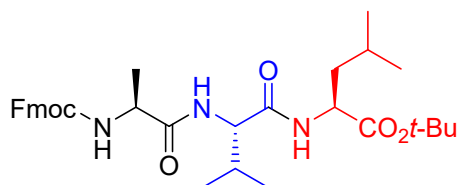

**Fmoc-L-Ala-L-Val-L-Leu-Ot-Bu (5m)** was prepared following **General Procedure 1** using H-L-Val-OH (29.3 mg, 0.250 mmol) and trimethylaluminum 2M in hexane (250  $\mu$ L, 0.500 mmol), the resulting mixture was stirred in DCM under  $N_2$  atmosphere at 0  $^\circ$ C. After 1 h, L-Leu-Ot-Bu (93.6 mg, 0.500 mmol) was added. The mixture was stirred under  $N_2$  atmosphere at ambient temperature. After 24 h, Fmoc-L-Ala-Cl (247 mg, 0.750 mmol) and pivalic acid (2.55 mg, 0.025 mmol) were



added into the reaction solution and stirring under N<sub>2</sub> atmosphere at room temperature for 24 h. The reaction mixture was purified by flash column chromatography (40% AcOEt in hexane) to provide the title compound as a white solid in 84% yield with >20:1 dr (122 mg).

R<sub>f</sub> = 0.27 (33% AcOEt in hexane). M.p. 110–115 °C. [α]<sub>D</sub><sup>23</sup> = –38.9 (c 1.05, CHCl<sub>3</sub>). <sup>1</sup>H NMR (400 MHz, CDCl<sub>3</sub>) δ 7.70 (d, *J* = 7.6 Hz, 2H, C<sub>12</sub>H<sub>8</sub>CHCH<sub>2</sub>OCONH), 7.56 (dd, *J* = 2.5 Hz and 7.6 Hz, 2H, C<sub>12</sub>H<sub>8</sub>CHCH<sub>2</sub>OCONH), 7.40 (br d, *J* = 8.9 Hz, 1H, NH), 7.36–7.21 (m, 5H, C<sub>12</sub>H<sub>8</sub>CHCH<sub>2</sub>OCONH and NH), 6.37 (d, *J* = 8.2 Hz, 1H, NH), 4.60–4.51 (m, 3H, CHCH<sub>2</sub>CH(CH<sub>3</sub>)<sub>2</sub> and CHCH(CH<sub>3</sub>)<sub>2</sub> and CHCH<sub>3</sub>), 4.32–4.30 (m, 2H, C<sub>12</sub>H<sub>8</sub>CHCH<sub>2</sub>OCONH), 4.17 (t, *J* = 7.3 Hz, 1H, C<sub>12</sub>H<sub>8</sub>CHCH<sub>2</sub>OCONH), 2.14–2.02 (m, 1H, CHCH(CH<sub>3</sub>)<sub>2</sub>), 1.62–1.40 (m, 3H, CHCH<sub>2</sub>CH(CH<sub>3</sub>)<sub>2</sub> and CHCH<sub>2</sub>CH(CH<sub>3</sub>)<sub>2</sub>), 1.40 (s, 9H, CO<sub>2</sub>C(CH<sub>3</sub>)<sub>3</sub>), 1.37 (d, *J* = 6.8 Hz, 3H, CHCH<sub>3</sub>), 0.95 (d, *J* = 6.6 Hz, 3H, CHCH(CH<sub>3</sub>)<sub>2</sub>), 0.93 (d, *J* = 6.6 Hz, 3H, CHCH(CH<sub>3</sub>)<sub>2</sub>), 0.86–0.83 (m, 6H, CHCH<sub>2</sub>CH(CH<sub>3</sub>)<sub>2</sub>). <sup>13</sup>C NMR (100 MHz, CDCl<sub>3</sub>) δ 172.7, 171.8, 170.9, 156.1, 143.8, 143.7, 141.1 (2C), 127.5 (2C), 126.9 (2C), 125.2 (2C), 119.8 (2C), 81.6, 67.1, 58.4, 51.4, 50.3, 47.0, 41.3, 31.3, 27.8 (3C), 24.8, 22.6, 22.0, 19.0 (2C), 18.4. IR (thin film, cm<sup>-1</sup>) 3291, 3066, 2961, 2934, 2877, 1725, 1703, 1643, 1528, 1450, 1361, 1301, 1252, 1227, 1151, 1107, 1075, 1041, 753. HRMS (ESI) calculated for C<sub>33</sub>H<sub>45</sub>N<sub>3</sub>O<sub>6</sub>Na [M+Na]<sup>+</sup> *m/z* 602.3175, found 602.3184.

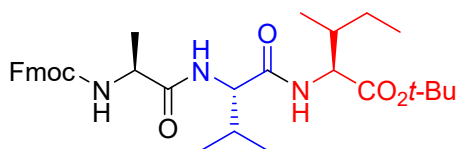

**Fmoc-L-Ala-L-Val-L-Ile-Ot-Bu (5n)** was prepared following **General Procedure 1** using H-L-Val-OH (29.3 mg, 0.250 mmol) and trimethylaluminum 2M in hexane (250 μL, 0.500 mmol), the resulting mixture was stirred in DCM under N<sub>2</sub> atmosphere at 0 °C. After 1 h, L-Ile-Ot-Bu (93.6 mg, 0.500 mmol) was added. The mixture was stirred under N<sub>2</sub> atmosphere at ambient temperature. After 24 h, Fmoc-L-Ala-Cl (247 mg, 0.750 mmol) and pivalic acid (2.55 mg, 0.025 mmol) were added into the reaction solution and stirring under N<sub>2</sub> atmosphere at room temperature for 24 h. The reaction mixture was purified by flash column chromatography (40% AcOEt in hexane) to provide the title compound as a white solid in 78% yield with >20:1 dr (113 mg).

R<sub>f</sub> = 0.35 (30% AcOEt in hexane). M.p. 90–95 °C. [α]<sub>D</sub><sup>23</sup> = –34.9 (c 1.09, CHCl<sub>3</sub>). <sup>1</sup>H NMR (400 MHz, CDCl<sub>3</sub>) δ 7.72 (d, *J* = 7.6 Hz, 2H, C<sub>12</sub>H<sub>8</sub>CHCH<sub>2</sub>OCONH), 7.58 (d, *J* = 7.6 Hz, 2H, C<sub>12</sub>H<sub>8</sub>CHCH<sub>2</sub>OCONH), 7.35 (t, *J* = 7.6 Hz, 2H, C<sub>12</sub>H<sub>8</sub>CHCH<sub>2</sub>OCONH), 7.27–7.18 (m, 3H, C<sub>12</sub>H<sub>8</sub>CHCH<sub>2</sub>OCONH and NH), 6.25 (d, *J* = 8.0 Hz, 1H, NH), 4.57–4.51 (m, 3H, CHCH(CH<sub>3</sub>)CH<sub>2</sub>CH<sub>3</sub> and CHCH(CH<sub>3</sub>)<sub>2</sub> and CHCH<sub>3</sub>), 4.38–4.29 (m, 2H, C<sub>12</sub>H<sub>8</sub>CHCH<sub>2</sub>OCONH), 4.19 (t, *J* = 7.3 Hz, 1H, C<sub>12</sub>H<sub>8</sub>CHCH<sub>2</sub>OCONH), 2.11–2.01 (m, 1H, CHCH(CH<sub>3</sub>)<sub>2</sub>), 1.88–1.78 (m, 1H, CHCH(CH<sub>3</sub>)CH<sub>2</sub>CH<sub>3</sub>), 1.42 (s, 9H, CO<sub>2</sub>C(CH<sub>3</sub>)<sub>3</sub>), 1.36 (d, *J* = 6.8 Hz, 3H, CHCH<sub>3</sub>), 1.19–1.08

(m, 1H, CHCH(CH<sub>3</sub>)CH<sub>2</sub>CH<sub>3</sub>), 0.97–0.93 (m, 7H, CHCH(CH<sub>3</sub>)CH<sub>2</sub>CH<sub>3</sub> and CHCH(CH<sub>3</sub>)CH<sub>2</sub>CH<sub>3</sub> and CHCH(CH<sub>3</sub>)CH<sub>2</sub>CH<sub>3</sub>), 0.86–0.82 (m, 6H, CHCH(CH<sub>3</sub>)<sub>2</sub>). <sup>13</sup>C NMR (100 MHz, CDCl<sub>3</sub>) δ 172.7, 171.0, 170.7, 156.1, 143.8(2C), 141.2(2C), 127.6(2C), 127.0(2C), 125.2, 125.1, 119.8(2C), 81.8, 67.1, 58.6, 56.8, 50.3, 47.0, 38.0, 31.2, 27.9(3C), 25.1, 19.1, 19.0, 18.4, 15.2, 11.6. IR (thin film, cm<sup>-1</sup>) 3293, 3069, 2965, 2933, 2875, 1728, 1703, 1643, 1526, 1450, 1368, 1301, 1252, 1227, 1151, 1107, 1078, 1043, 756. HRMS (ESI) calculated for C<sub>33</sub>H<sub>45</sub>N<sub>3</sub>O<sub>6</sub>Na [M+Na]<sup>+</sup> *m/z* 602.3175, found 602.3206.

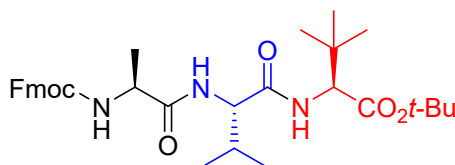

**Fmoc-L-Ala-L-Val-L-Tle-Ot-Bu (5o)** was prepared following **General Procedure 1** using H-L-Val-OH (29.3 mg, 0.250 mmol) and trimethylaluminum 2M in hexane (250 μL, 0.500 mmol), the resulting mixture was stirred in DCM under N<sub>2</sub> atmosphere at 0 °C. After 1 h, L-Tle-Ot-Bu (93.6 mg, 0.500 mmol) was added. The mixture was stirred under N<sub>2</sub> atmosphere at ambient temperature. After 24 h, Fmoc-L-Ala-Cl (247 mg, 0.750 mmol) and pivalic acid (2.55 mg, 0.025 mmol) were added into the reaction solution and stirring under N<sub>2</sub> atmosphere at room temperature for 24 h. The reaction mixture was purified by flash column chromatography (40% AcOEt in hexane) to provide the title compound as a white solid in 85% yield with >20:1 dr (123 mg).

R<sub>f</sub> = 0.61 (50% AcOEt in hexane). M.p. 195–200 °C. [α]<sub>D</sub><sup>20</sup> = –39.0 (*c* 1.01, CHCl<sub>3</sub>). <sup>1</sup>H NMR (400 MHz, CDCl<sub>3</sub>) δ 7.72 (d, *J* = 7.6 Hz, 2H, C<sub>12</sub>H<sub>8</sub>CHCH<sub>2</sub>OCONH), 7.59–5.57 (m, 2H, C<sub>12</sub>H<sub>8</sub>CHCH<sub>2</sub>OCONH), 7.42 (br d, *J* = 9.2 Hz, 1H, NH), 7.36 (t, *J* = 7.4 Hz, 2H, C<sub>12</sub>H<sub>8</sub>CHCH<sub>2</sub>OCONH), 7.27–7.23 (m, 2H, C<sub>12</sub>H<sub>8</sub>CHCH<sub>2</sub>OCONH), 7.13 (br d, *J* = 8.7 Hz, 1H, NH), 6.36 (d, *J* = 8.3 Hz, 1H, NH), 4.64–4.28 (m, 5H, CHC(CH<sub>3</sub>)<sub>3</sub> and CHCH(CH<sub>3</sub>)<sub>2</sub> and CHCH<sub>3</sub> and C<sub>12</sub>H<sub>8</sub>CHCH<sub>2</sub>OCONH), 4.19 (t, *J* = 7.3 Hz, 1H, C<sub>12</sub>H<sub>8</sub>CHCH<sub>2</sub>OCONH), 2.08–1.98 (m, 1H, CHCH(CH<sub>3</sub>)<sub>2</sub>), 1.42 (s, 9H, CO<sub>2</sub>C(CH<sub>3</sub>)<sub>3</sub>), 1.36 (d, *J* = 7.1 Hz, 3H, CHCH<sub>3</sub>), 0.94–0.93 (m, 15H, CHC(CH<sub>3</sub>)<sub>3</sub> and CHCH(CH<sub>3</sub>)<sub>2</sub>). <sup>13</sup>C NMR (100 MHz, CDCl<sub>3</sub>) δ 172.5, 170.8, 170.3, 156.0, 143.8(2C), 141.2(2C), 127.6(2C), 127.0(2C), 125.1(2C), 119.9(2C), 82.0, 67.1, 60.5, 58.7, 50.4, 47.1, 34.9, 31.1, 28.0(3C), 26.6(3C), 19.0, 18.8, 18.4. IR (thin film, cm<sup>-1</sup>) 3277, 3065, 2966, 2875, 1725, 1707, 1644, 1525, 1449, 1391, 1366, 1251, 1221, 1150, 1109, 1043, 756. HRMS (ESI) calculated for C<sub>33</sub>H<sub>45</sub>N<sub>3</sub>O<sub>6</sub>Na [M+Na]<sup>+</sup> *m/z* 602.3206, found 602.3217.

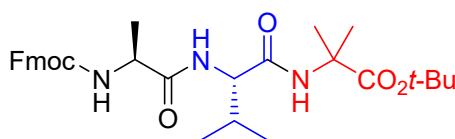

**Fmoc-L-Ala-L-Val-Aib-Ot-Bu (5p)** was prepared following **General Procedure 1** using H-L-Val-OH (29.3 mg, 0.250 mmol) and trimethylaluminum 2M in hexane (250  $\mu$ L, 0.500 mmol), the resulting mixture was stirred in DCM under N<sub>2</sub> atmosphere at 0 °C. After 1 h, Aib-Ot-Bu (79.6 mg, 0.500 mmol) was added. The mixture was stirred under N<sub>2</sub> atmosphere at ambient temperature. After 24 h, Fmoc-L-Ala-Cl (247 mg, 0.750 mmol) and pivalic acid (2.55 mg, 0.025 mmol) were added into the reaction solution and stirring under N<sub>2</sub> atmosphere at room temperature for 24 h. The reaction mixture was purified by flash column chromatography (45% AcOEt in hexane) to provide the title compound as a white solid in 90% yield with >20:1 dr (124 mg).

R<sub>f</sub> = 0.43 (50% AcOEt in hexane). M.p. 125–130 °C.  $[\alpha]_{\text{D}}^{23} = -89.0$  (*c* 1.01, CHCl<sub>3</sub>). <sup>1</sup>H NMR (400 MHz, CDCl<sub>3</sub>)  $\delta$  7.74 (d, *J* = 7.6 Hz, 2H, C<sub>12</sub>H<sub>8</sub>CHCH<sub>2</sub>OCONH), 7.58–7.55 (m, 2H, C<sub>12</sub>H<sub>8</sub>CHCH<sub>2</sub>OCONH), 7.38 (t, *J* = 7.6 Hz, 2H, C<sub>12</sub>H<sub>8</sub>CHCH<sub>2</sub>OCONH), 7.30–7.26 (m, 2H, C<sub>12</sub>H<sub>8</sub>CHCH<sub>2</sub>OCONH), 6.93 (br d, *J* = 8.5 Hz, 1H, NH), 6.77 (br s, 1H, NH), 5.75 (br d, *J* = 7.3 Hz, 1H, NH), 4.41–4.32 (m, 3H, CHCH<sub>3</sub> and C<sub>12</sub>H<sub>8</sub>CHCH<sub>2</sub>OCONH), 4.28–4.25 (m, 1H, CHCH(CH<sub>3</sub>)<sub>2</sub>), 4.20 (t, *J* = 7.4 Hz, 1H, C<sub>12</sub>H<sub>8</sub>CHCH<sub>2</sub>OCONH), 2.16–2.07 (m, 1H, CHCH(CH<sub>3</sub>)<sub>2</sub>), 1.43 (s, 9H, CO<sub>2</sub>C(CH<sub>3</sub>)<sub>3</sub>), 1.38 (d, *J* = 6.9 Hz, 3H, CHCH<sub>3</sub>), 0.96–0.91 (m, 6H, CHCH(CH<sub>3</sub>)<sub>2</sub>). <sup>13</sup>C NMR (100 MHz, CDCl<sub>3</sub>)  $\delta$  173.4, 172.4, 169.6, 156.0, 143.8, 143.7, 141.2 (2C), 127.6 (2C), 127.1 (2C), 125.0 (2C), 119.9 (2C), 81.6, 67.1, 58.5, 56.9, 50.5, 47.0, 31.1, 27.8 (3C), 24.5, 24.2, 19.1, 18.8, 18.0. IR (thin film, cm<sup>-1</sup>) 3297, 2975, 2931, 1715, 1666, 1513, 1450, 1393, 1369, 1315, 1244, 1155, 1117, 1075, 1033, 982, 755. HRMS (ESI) calculated for C<sub>31</sub>H<sub>41</sub>N<sub>3</sub>O<sub>6</sub>Na [M+Na]<sup>+</sup> *m/z* 574.2893, found 574.2921.

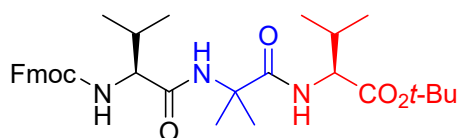

**Fmoc-L-Val-Aib-L-Val-Ot-Bu (5q)** was prepared following **General Procedure 1** using H-Aib-OH (25.8 mg, 0.250 mmol) and trimethylaluminum 2M in hexane (250  $\mu$ L, 0.500 mmol), the resulting mixture was stirred in DCM under N<sub>2</sub> atmosphere at 0 °C. After 1 h, L-Val-Ot-Bu (86.6 mg, 0.500 mmol) was added. The mixture was stirred under N<sub>2</sub> atmosphere at ambient temperature. After 24 h, Fmoc-L-Val-Cl (268 mg, 0.750 mmol) and pivalic acid (2.55 mg, 0.025 mmol) were added into the reaction solution and stirring under N<sub>2</sub> atmosphere at room temperature for 24 h. The reaction mixture was purified by flash column chromatography (33% AcOEt in hexane) to provide the title compound as a white solid in 91% yield with >20:1 dr (132 mg).

R<sub>f</sub> = 0.31 (33% AcOEt in hexane). M.p. 135–140 °C.  $[\alpha]_{\text{D}}^{22} = -45.4$  (*c* 1.01, CHCl<sub>3</sub>). <sup>1</sup>H NMR (400 MHz, CDCl<sub>3</sub>)  $\delta$  7.74 (d, *J* = 7.3 Hz, 2H, C<sub>12</sub>H<sub>8</sub>CHCH<sub>2</sub>OCONH), 7.57 (d, *J* = 7.4 Hz, 2H, C<sub>12</sub>H<sub>8</sub>CHCH<sub>2</sub>OCONH), 7.38 (t, *J* = 7.6 Hz, 2H, C<sub>12</sub>H<sub>8</sub>CHCH<sub>2</sub>OCONH), 7.31–7.26 (m, 2H, C<sub>12</sub>H<sub>8</sub>CHCH<sub>2</sub>OCONH), 6.81–7.76 (m, 2H, NH and NH), 5.50 (d, *J* = 8.2 Hz, 1H, NH), 4.45–4.29

(m, 3H, C<sub>12</sub>H<sub>8</sub>CHCH<sub>2</sub>OCONH and CHCH(CH<sub>3</sub>)<sub>2</sub>), 4.20 (dd, *J* = 6.9 Hz and 7.1 Hz, 1H, CHCH(CH<sub>3</sub>)<sub>2</sub>), 3.96 (t, *J* = 7.3 Hz, 1H, C<sub>12</sub>H<sub>8</sub>CHCH<sub>2</sub>OCONH), 2.21–2.08 (m, 2H, CHCH(CH<sub>3</sub>)<sub>2</sub> and CHCH(CH<sub>3</sub>)<sub>2</sub>), 1.61 (s, 3H, C(CH<sub>3</sub>)<sub>2</sub>), 1.57 (s, 3H, C(CH<sub>3</sub>)<sub>2</sub>), 1.43 (s, 9H, CO<sub>2</sub>C(CH<sub>3</sub>)<sub>3</sub>), 0.98–0.85 (m, 12H, CHCH(CH<sub>3</sub>)<sub>2</sub> and CHCH(CH<sub>3</sub>)<sub>2</sub>). <sup>13</sup>C NMR (100 MHz, CDCl<sub>3</sub>) δ 173.7, 170.8, 170.7, 156.4, 143.7(2C), 141.2(2C), 127.6(2C), 127.0(2C), 125.0, 124.9, 119.8(2C), 81.8, 67.0, 60.7, 57.6, 57.4, 47.1, 31.3, 31.0, 27.9(3C), 25.7, 24.4, 19.1, 18.8, 17.9, 17.5. IR (thin film, cm<sup>-1</sup>) 3294, 3065, 2969, 2934, 1703, 1674, 1647, 1530, 1449, 1393, 1310, 1253, 1221, 1149, 1108, 1049, 756. HRMS (ESI) calculated for C<sub>33</sub>H<sub>45</sub>N<sub>3</sub>O<sub>6</sub>Na [M+Na]<sup>+</sup> *m/z* 602.3206, found 602.3213.

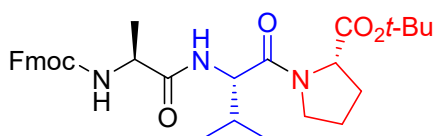

**Fmoc-L-Ala-L-Val-L-Pro-Ot-Bu (5r)** was prepared following **General Procedure 1** using H-L-Val-OH (29.3 mg, 0.250 mmol) and trimethylaluminum 2M in hexane (250 μL, 0.500 mmol), the resulting mixture was stirred in DCM under N<sub>2</sub> atmosphere at 0 °C. After 1 h, L-Pro-Ot-Bu (85.6 mg, 0.500 mmol) was added. The mixture was stirred under N<sub>2</sub> atmosphere at ambient temperature. After 24 h, Fmoc-L-Ala-Cl (247 mg, 0.750 mmol) and pivalic acid (2.55 mg, 0.025 mmol) were added into the reaction solution and stirring under N<sub>2</sub> atmosphere at room temperature for 24 h. The reaction mixture was purified by flash column chromatography (50% AcOEt in hexane) to provide the title compound as a white solid in 68% yield with >20:1 dr (95.8 mg).

R<sub>f</sub> = 0.35 (50% AcOEt in hexane). M.p. 80–85 °C. [α]<sub>D</sub><sup>23</sup> = –45.7 (*c* 1.01, CHCl<sub>3</sub>). <sup>1</sup>H NMR (400 MHz, CDCl<sub>3</sub>) δ 7.74 (d, *J* = 7.6 Hz, 2H, C<sub>12</sub>H<sub>8</sub>CHCH<sub>2</sub>OCONH), 7.58 (d, *J* = 7.6 Hz, 2H, C<sub>12</sub>H<sub>8</sub>CHCH<sub>2</sub>OCONH), 7.38 (t, *J* = 7.6 Hz, 2H, C<sub>12</sub>H<sub>8</sub>CHCH<sub>2</sub>OCONH), 7.31–7.27 (m, 2H, C<sub>12</sub>H<sub>8</sub>CHCH<sub>2</sub>OCONH), 6.98 (br d, *J* = 8.7 Hz, 1H, NH), 5.65 (br d, *J* = 7.6 Hz, 1H, NH), 4.64 (dd, *J* = 5.8 Hz and 8.7 Hz, 1H, NCHCO<sub>2</sub>C(CH<sub>3</sub>)<sub>3</sub>), 4.39–4.32 (m, 4H, CHCH(CH<sub>3</sub>)<sub>2</sub> and CHCH<sub>3</sub> and C<sub>12</sub>H<sub>8</sub>CHCH<sub>2</sub>OCONH), 4.20 (t, *J* = 7.1 Hz, 1H, C<sub>12</sub>H<sub>8</sub>CHCH<sub>2</sub>OCONH), 3.78–3.61 (m, 2H, N(CH<sub>2</sub>CH<sub>2</sub>CH<sub>2</sub>C)), 2.24–1.87 (m, 5H, CHCH(CH<sub>3</sub>)<sub>2</sub> and N(CH<sub>2</sub>CH<sub>2</sub>CH<sub>2</sub>C) and N(CH<sub>2</sub>CH<sub>2</sub>CH<sub>2</sub>C)), 1.44 (s, 9H, CO<sub>2</sub>C(CH<sub>3</sub>)<sub>3</sub>), 1.36 (d, *J* = 7.1 Hz, 3H, CHCH<sub>3</sub>), 1.03 (d, *J* = 6.9 Hz, 3H, CHCH(CH<sub>3</sub>)<sub>2</sub>), 0.93 (d, *J* = 6.9 Hz, 3H, CHCH(CH<sub>3</sub>)<sub>2</sub>). <sup>13</sup>C NMR (100 MHz, CDCl<sub>3</sub>) δ 172.3, 171.0, 170.1, 155.6, 143.8, 143.7, 141.2 (2C), 127.6 (2C), 127.0 (2C), 125.1 (2C), 119.8 (2C), 81.3, 66.9, 59.7, 55.4, 50.4, 47.3, 47.0, 31.3, 29.0, 28.0 (3C), 24.8, 19.4, 18.9, 17.5. IR (thin film, cm<sup>-1</sup>) 3301, 2967, 2935, 2875, 1725, 1703, 1645, 1525, 1441, 1371, 1305, 1241, 1225, 1150, 1107, 1078, 1043, 756. HRMS (ESI) calculated for C<sub>32</sub>H<sub>41</sub>N<sub>3</sub>O<sub>6</sub>Na [M+Na]<sup>+</sup> *m/z* 586.2893, found 586.2889.

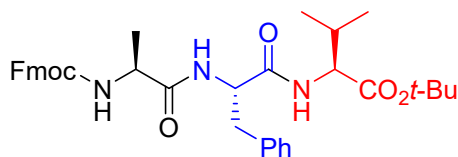

**Fmoc-L-Ala-L-Phe-L-Val-Ot-Bu (5s)** was prepared following **General Procedure 1** using H-L-Phe-OH (41.3 mg, 0.250 mmol) and trimethylaluminum 2M in hexane (250  $\mu$ L, 0.500 mmol), the resulting mixture was stirred in DCM under  $N_2$  atmosphere at 0  $^\circ$ C. After 1 h, L-Val-Ot-Bu (86.6 mg, 0.500 mmol) was added. The mixture was stirred under  $N_2$  atmosphere at ambient temperature. After 24 h, Fmoc-L-Ala-Cl (247 mg, 0.750 mmol) and pivalic acid (2.55 mg, 0.025 mmol) were added into the reaction solution and stirring under  $N_2$  atmosphere at room temperature for 24 h. The reaction mixture was purified by flash column chromatography (35% AcOEt in hexane) to provide the title compound as a white solid in 94% yield with >20:1 dr (144 mg).

$R_f = 0.29$  (33% AcOEt in hexane). M.p. 170–175  $^\circ$ C.  $[\alpha]_D^{20} = -70.0$  ( $c$  1.20,  $CHCl_3$ ).  $^1H$  NMR (400 MHz,  $CDCl_3$ )  $\delta$  7.71 (d,  $J = 7.6$  Hz, 2H,  $C_{12}H_8CHCH_2OCONH$ ), 7.58 (t,  $J = 8.9$  Hz, 2H,  $C_{12}H_8CHCH_2OCONH$ ), 7.46 (br d,  $J = 7.8$  Hz, 1H,  $NH$ ), 7.38–7.32 (m, 2H,  $C_{12}H_8CHCH_2OCONH$ ), 7.27–7.23 (m, 2H,  $C_{12}H_8CHCH_2OCONH$ ), 7.17–7.05 (m, 5H,  $CHCH_2C_6H_5$ ), 7.07 (br d,  $J = 6.9$  Hz, 1H,  $NH$ ), 6.17 (d,  $J = 8.0$  Hz, 1H,  $NH$ ), 4.98 (dd,  $J = 6.9$  Hz and 14 Hz 1H,  $CHCH_2Ph$ ), 4.51 (quin,  $J = 7.3$  Hz 1H,  $CHCH_3$ ), 4.44–4.27 (m, 3H,  $C_{12}H_8CHCH_2OCONH$ ,  $CHCH(CH_3)_2$ ), 4.18 (t,  $J = 7.1$  Hz,  $C_{12}H_8CHCH_2OCONH$ ), 3.08 (dd,  $J = 6.9$  Hz and 14 Hz, 1H,  $CHCH_2Ph$ ), 2.99 (dd,  $J = 6.9$  Hz and 14 Hz, 1H,  $CHCH_2Ph$ ), 2.09–2.03 (m, 1H,  $CHCH(CH_3)_2$ ), 1.41 (s, 9H,  $CO_2C(CH_3)_3$ ), 1.32 (d,  $J = 7.3$  Hz, 3H,  $CHCH_3$ ), 0.84 (d,  $J = 6.9$  Hz, 3H,  $CHCH(CH_3)_2$ ), 0.81 (d,  $J = 6.9$  Hz, 3H,  $CHCH(CH_3)_2$ ).  $^{13}C$  NMR (100 MHz,  $CDCl_3$ )  $\delta$  172.5, 170.7, 170.4, 155.9, 143.8(2C), 141.1(2C), 136.3, 129.2(2C), 128.3(2C), 127.5(2C), 126.9 (2C), 126.7, 125.1 (2C), 119.8 (2C), 81.7, 67.1, 57.4, 54.3, 50.2, 46.9, 38.4, 31.4, 27.9 (3C), 19.0, 18.7, 17.6. IR (thin film,  $cm^{-1}$ ) 3293, 3064, 2969, 2933, 1706, 1645, 1530, 1477, 1450, 1393, 1313, 1221, 1143, 1110, 1078, 1045, 757. HRMS (ESI) calculated for  $C_{36}H_{43}N_3O_6Na$   $[M+Na]^+$   $m/z$  636.3022, found 636.3049.

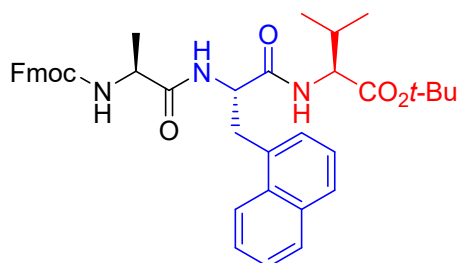

**Fmoc-L-Ala-L-Ala(1-Naph)-L-Val-Ot-Bu (5t)** was prepared following **General Procedure 1** using H-L-Ala(1-Naph)-OH (53.8 mg, 0.250 mmol) and trimethylaluminum 2M in hexane (250  $\mu$ L, 0.500 mmol), the resulting mixture was stirred in DCM under  $N_2$  atmosphere at 0  $^\circ$ C. After 1 h, L-Val-Ot-

Bu (86.6 mg, 0.500 mmol) was added. The mixture was stirred under N<sub>2</sub> atmosphere at ambient temperature. After 24 h, Fmoc-L-Ala-Cl (247 mg, 0.750 mmol) and pivalic acid (2.55 mg, 0.025 mmol) were added into the reaction solution and stirring under N<sub>2</sub> atmosphere at room temperature for 24 h. The reaction mixture was purified by flash column chromatography (40% AcOEt in hexane) to provide the title compound as a white solid in 86% yield with >20:1 dr (143 mg).

R<sub>f</sub> = 0.68 (50% AcOEt in hexane). M.p. 210–215 °C. [α]<sub>D</sub><sup>20</sup> = –79.0 (*c* 1.01, CHCl<sub>3</sub>). <sup>1</sup>H NMR (400 MHz, CDCl<sub>3</sub>) δ 8.14 (d, *J* = 8.2 Hz, 1H, CHCH<sub>2</sub>Naph $\underline{H}$ ), 7.78–7.74 (m, 3H, C<sub>12</sub> $\underline{H}_8$ CHCH<sub>2</sub>OCONH and CHCH<sub>2</sub>Naph $\underline{H}$ ), 7.66–7.37 (m, 7H, C<sub>12</sub> $\underline{H}_8$ CHCH<sub>2</sub>OCONH and CHCH<sub>2</sub>Naph $\underline{H}$ ), 7.32–7.25 (m, 4H, C<sub>12</sub> $\underline{H}_8$ CHCH<sub>2</sub>OCONH and CHCH<sub>2</sub>Naph $\underline{H}$ ), 6.94 (br d, *J* = 7.1 Hz, 1H, NH), 6.46 (br d, *J* = 7.8 Hz, 1H, NH), 5.47 (d, *J* = 7.8 Hz, 1H, NH), 4.88 (quin., *J* = 7.1 Hz, 1H, CHCH<sub>3</sub>), 4.40–4.26 (m, 4H, CHCH<sub>2</sub>Naph and C<sub>12</sub>H<sub>8</sub>CHCH<sub>2</sub>OCONH and CHCH(CH<sub>3</sub>)<sub>2</sub>), 4.17 (t, *J* = 6.9 Hz, C<sub>12</sub>H<sub>8</sub>CHCH<sub>2</sub>OCONH), 3.50 (d, *J* = 6.9 Hz, 2H, CHCH<sub>2</sub>Naph), 2.06–2.02 (m, 1H, CHCH(CH<sub>3</sub>)<sub>2</sub>), 1.39 (s, 9H, CO<sub>2</sub>C(CH<sub>3</sub>)<sub>3</sub>), 1.27 (d, *J* = 7.1 Hz, 3H, CHCH<sub>3</sub>), 0.80 (d, *J* = 6.2 Hz, 3H, CHCH(CH<sub>3</sub>)<sub>2</sub>), 0.78 (d, *J* = 6.2 Hz, 3H, CHCH(CH<sub>3</sub>)<sub>2</sub>). <sup>13</sup>C NMR (100 MHz, CDCl<sub>3</sub>) δ 172.4, 170.6, 170.0, 155.8, 143.8, 143.7, 141.2(2C), 134.0, 132.4, 132.0, 128.7, 127.7(2C), 127.6(2C), 127.0(2C), 125.8(2C), 125.4, 125.2, 125.1, 123.5, 119.9(2C), 81.8, 67.0, 57.5, 54.1, 50.3, 47.0, 35.3, 31.4, 27.9(3C), 18.8, 18.6, 17.7. IR (thin film, cm<sup>-1</sup>) 3290, 3061, 2966, 2931, 1705, 1644, 1531, 1475, 1453, 1391, 1313, 1221, 1143, 1110, 1078, 1045, 757. HRMS (ESI) calculated for C<sub>40</sub>H<sub>45</sub>N<sub>3</sub>O<sub>6</sub>Na [M+Na]<sup>+</sup> *m/z* 686.3206, found 686.3221.

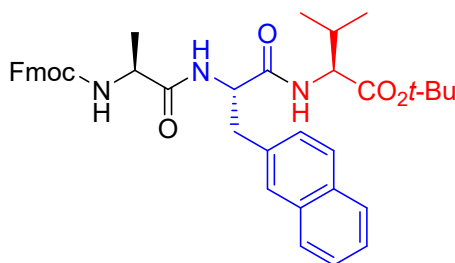

**Fmoc-L-Ala-L-Ala(2-Naph)-L-Val-Ot-Bu (5u)** was prepared following **General Procedure 1** using H-L-Ala(2-Naph)-OH (53.8 mg, 0.250 mmol) and trimethylaluminum 2M in hexane (250 μL, 0.500 mmol), the resulting mixture was stirred in DCM under N<sub>2</sub> atmosphere at 0 °C. After 1 h, L-Val-Ot-Bu (86.6 mg, 0.500 mmol) was added. The mixture was stirred under N<sub>2</sub> atmosphere at ambient temperature. After 24 h, Fmoc-L-Ala-Cl (247 mg, 0.750 mmol) and pivalic acid (2.55 mg, 0.025 mmol) were added into the reaction solution and stirring under N<sub>2</sub> atmosphere at room temperature for 24 h. The reaction mixture was purified by flash column chromatography (35% AcOEt in hexane) to provide the title compound as a white solid in 87% yield with >20:1 dr (144 mg).

R<sub>f</sub> = 0.58 (50% AcOEt in hexane). M.p. 180–185 °C. [α]<sub>D</sub><sup>20</sup> = –73.3 (*c* 1.01, CHCl<sub>3</sub>). <sup>1</sup>H NMR (400 MHz, CDCl<sub>3</sub>) δ 7.74–7.64 (m, 5H, C<sub>12</sub> $\underline{H}_8$ CHCH<sub>2</sub>OCONH and CHCH<sub>2</sub>Naph $\underline{H}$ ), 7.58–7.51 (m, 3H,

$C_{12}H_8CHCH_2OCONH$  and  $CHCH_2NaphH$ ), 7.39–7.23 (m, 7H,  $C_{12}H_8CHCH_2OCONH$  and  $CHCH_2NaphH$ ), 7.14 (br d,  $J = 7.6$  Hz, 1H,  $NH$ ), 6.88 (br d,  $J = 8.3$  Hz, 1H,  $NH$ ), 5.76 (d,  $J = 7.8$  Hz, 1H,  $NH$ ), 4.94 (quin.,  $J = 7.3$  Hz, 1H,  $CHCH_3$ ), 4.41–4.31 (m, 3H,  $C_{12}H_8CHCH_2OCONH$  and  $CHCH(CH_3)_2$ ), 4.21 (t,  $J = 7.1$  Hz, 1H,  $CHCH_2Naph$ ), 4.12 (t,  $J = 7.1$  Hz,  $C_{12}H_8CHCH_2OCONH$ ), 3.24 (dd,  $J = 6.9$  Hz and 14 Hz, 1H,  $CHCH_2Naph$ ), 3.15 (dd,  $J = 6.9$  Hz and 14 Hz, 1H,  $CHCH_2Naph$ ), 2.10–2.03 (m, 1H,  $CHCH(CH_3)_2$ ), 1.35 (s, 9H,  $CO_2C(CH_3)_3$ ), 1.30 (d,  $J = 7.3$  Hz, 3H,  $CHCH_3$ ), 0.83 (d,  $J = 6.6$  Hz, 3H,  $CHCH(CH_3)_2$ ), 0.79 (d,  $J = 6.6$  Hz, 3H,  $CHCH(CH_3)_2$ ).  $^{13}C$  NMR (100 MHz,  $CDCl_3$ )  $\delta$  172.4, 170.5, 170.3, 155.9, 143.8, 143.7, 141.2(2C), 133.7, 133.3, 132.3, 128.1, 128.0, 127.6, 127.5(2C), 127.4(2C), 127.3, 127.0(2C), 125.9, 125.5, 125.1, 119.9(2C), 81.8, 67.0, 57.5, 54.4, 50.4, 47.0, 38.3, 31.3, 27.9(3C), 18.7(2C), 17.6. IR (thin film,  $cm^{-1}$ ) 3293, 3061, 2966, 2931, 1705, 1645, 1531, 1478, 1451, 1391, 1313, 1221, 1143, 1109, 1078, 1044, 757. HRMS (ESI) calculated for  $C_{40}H_{45}N_3O_6Na$   $[M+Na]^+$   $m/z$  686.3206, found 686.3182.

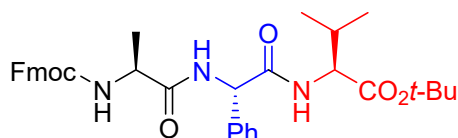

**Fmoc-L-Ala-L-Phg-L-Val-Ot-Bu (5v)** was prepared following **General Procedure 1** using H-L-Tyr(*t*-Bu)-OH (37.8 mg, 0.250 mmol) and trimethylaluminum 2M in hexane (250  $\mu$ L, 0.500 mmol), the resulting mixture was stirred in DCM under  $N_2$  atmosphere at 0  $^{\circ}C$ . After 1 h, L-Val-Ot-Bu (86.6 mg, 0.500 mmol) was added. The mixture was stirred under  $N_2$  atmosphere at ambient temperature. After 24 h, Fmoc-L-Ala-Cl (247 mg, 0.750 mmol) and pivalic acid (2.55 mg, 0.025 mmol) were added into the reaction solution and stirring under  $N_2$  atmosphere at room temperature for 24 h. The reaction mixture was purified by flash column chromatography (45% AcOEt in hexane) to provide the title compound as a white solid in 93% yield with  $>20:1$  dr (139 mg).

$R_f = 0.41$  (50% AcOEt in hexane). M.p. 120–125  $^{\circ}C$ .  $[\alpha]_D^{22} = -25.7$  ( $c$  1.13,  $CHCl_3$ ).  $^1H$  NMR (400 MHz,  $CDCl_3$ )  $\delta$  7.73–7.69 (m, 3H,  $C_{12}H_8CHCH_2OCONH$  and  $NH$ ), 7.55 (d,  $J = 7.3$  Hz, 2H,  $C_{12}H_8CHCH_2OCONH$ ), 7.37–7.22 (m, 10H,  $C_{12}H_8CHCH_2OCONH$  and  $CHC_6H_5$  and  $NH$ ), 6.85 (br d,  $J = 8.5$  Hz, 1H,  $NH$ ), 5.97 (br d,  $J = 7.6$  Hz, 1H,  $NH$ ), 5.71 (d,  $J = 7.4$  Hz, 1H,  $CHPh$ ), 4.52 (quin.,  $J = 6.7$  Hz, 1H,  $CHCH_3$ ), 4.38–4.29 (m, 3H,  $C_{12}H_8CHCH_2OCONH$  and  $CHCH(CH_3)_2$ ), 4.16 (t,  $J = 7.1$  Hz,  $C_{12}H_8CHCH_2OCONH$ ), 2.11–2.05 (m, 1H,  $CHCH(CH_3)_2$ ), 1.36 (d,  $J = 7.1$  Hz, 3H,  $CHCH_3$ ), 1.30 (s, 9H,  $CO_2C(CH_3)_3$ ), 0.89 (d,  $J = 6.9$  Hz, 3H,  $CHCH(CH_3)_2$ ), 0.86 (d,  $J = 6.9$  Hz, 3H,  $CHCH(CH_3)_2$ ).  $^{13}C$  NMR (100 MHz,  $CDCl_3$ )  $\delta$  172.1, 170.1, 169.5, 155.9, 143.9, 143.7, 141.1 (2C), 137.4 (2C), 128.8 (2C), 128.2, 127.6 (2C), 126.9 (3C), 125.0 (2C), 119.8 (2C), 81.9, 67.0, 58.1, 56.9, 50.3, 47.0, 31.4, 27.8 (3C), 19.1, 18.7, 17.8. IR (thin film,  $cm^{-1}$ ) 3296, 3064, 2968, 1726, 1702, 1641, 1521, 1449, 1391, 1367, 1312, 1252, 1217, 1143, 1108, 1078, 1042, 754. HRMS (ESI) calculated for  $C_{35}H_{41}N_3O_6Na$   $[M+Na]^+$   $m/z$  622.2867, found 622.2893.

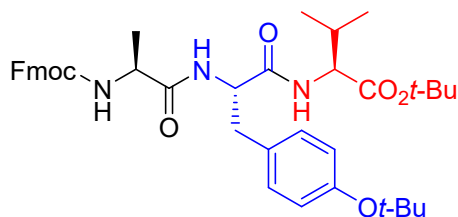

**Fmoc-L-Ala-L-Tyr(*t*-Bu)-L-Val-O*t*-Bu (5w)** was prepared following **General Procedure 1** using H-L-Tyr(*t*-Bu)-OH (59.3 mg, 0.250 mmol) and trimethylaluminum 2M in hexane (250  $\mu$ L, 0.500 mmol), the resulting mixture was stirred in DCM under N<sub>2</sub> atmosphere at 0 °C. After 1 h, L-Val-O*t*-Bu (86.6 mg, 0.500 mmol) was added. The mixture was stirred under N<sub>2</sub> atmosphere at ambient temperature. After 24 h, Fmoc-L-Ala-Cl (247 mg, 0.750 mmol) and pivalic acid (2.55 mg, 0.025 mmol) were added into the reaction solution and stirring under N<sub>2</sub> atmosphere at room temperature for 24 h. The reaction mixture was purified by flash column chromatography (35% AcOEt in hexane) to provide the title compound as a white solid in 91% yield with >20:1 dr (156 mg).

R<sub>f</sub> = 0.29 (33% AcOEt in hexane). M.p. 90–95 °C. [ $\alpha$ ]<sub>D</sub><sup>19</sup> = –58.2 (*c* 1.10, CHCl<sub>3</sub>). <sup>1</sup>H NMR (400 MHz, CDCl<sub>3</sub>)  $\delta$  7.74 (d, *J* = 6.9 Hz, 2H, C<sub>12</sub>H<sub>8</sub>CHCH<sub>2</sub>OCONH), 7.59 (t, *J* = 6.2 Hz, 2H, C<sub>12</sub>H<sub>8</sub>CHCH<sub>2</sub>OCONH), 7.41–7.36 (m, 2H, C<sub>12</sub>H<sub>8</sub>CHCH<sub>2</sub>OCONH), 7.32–7.29 (m, 2H, C<sub>12</sub>H<sub>8</sub>CHCH<sub>2</sub>OCONH), 7.07 (d, *J* = 8.5 Hz, 2H, CHCH<sub>2</sub>C<sub>6</sub>H<sub>4</sub>OC(CH<sub>3</sub>)<sub>3</sub>), 6.90 (br d, *J* = 7.1 Hz, 1H, NH), 6.84 (d, *J* = 8.5 Hz, 2H, CHCH<sub>2</sub>C<sub>6</sub>H<sub>4</sub>OC(CH<sub>3</sub>)<sub>3</sub>), 6.66 (br d, *J* = 8.0 Hz, 1H, NH), 5.60 (d, *J* = 7.6 Hz, 1H, C<sub>12</sub>H<sub>8</sub>CHCH<sub>2</sub>OCONH), 4.74 (quin, *J* = 7.1 Hz 1H, CHCH<sub>3</sub>), 4.41–4.31 (m, 4H, C<sub>12</sub>H<sub>8</sub>CHCH<sub>2</sub>OCONH, CHCH(CH<sub>3</sub>)<sub>2</sub>, CHCH<sub>2</sub>C<sub>6</sub>H<sub>4</sub>OC(CH<sub>3</sub>)<sub>3</sub>), 4.20 (t, *J* = 7.1 Hz, C<sub>12</sub>H<sub>8</sub>CHCH<sub>2</sub>OCONH), 3.03 (d quin., *J* = 6.6 Hz and 14 Hz, 2H, CHCH<sub>2</sub>C<sub>6</sub>H<sub>4</sub>OC(CH<sub>3</sub>)<sub>3</sub>), 2.11–2.03 (m, 1H, CHCH(CH<sub>3</sub>)<sub>2</sub>), 1.44 (s, 9H, CO<sub>2</sub>C(CH<sub>3</sub>)<sub>3</sub>), 1.32 (d, *J* = 6.6 Hz, 3H, CHCH<sub>3</sub>), 1.26 (s, 9H, CHCH<sub>2</sub>C<sub>6</sub>H<sub>4</sub>OC(CH<sub>3</sub>)<sub>3</sub>), 0.84 (d, *J* = 6.9 Hz, 3H, CHCH(CH<sub>3</sub>)<sub>2</sub>), 0.81 (d, *J* = 6.9 Hz, 3H, CHCH(CH<sub>3</sub>)<sub>2</sub>). <sup>13</sup>C NMR (100 MHz, CDCl<sub>3</sub>)  $\delta$  172.3, 170.5, 170.3, 155.9, 154.2, 143.8, 143.7, 141.2(2C), 131.1, 129.7(2C), 127.6(2C), 127.0(2C), 125.1(2C), 124.1(2C), 119.8(2C), 81.8, 78.1, 67.0, 57.6, 54.4, 50.4, 47.0, 37.4, 31.2, 28.7(3C), 27.9(3C), 18.8, 18.7, 17.6. IR (thin film, cm<sup>-1</sup>) 3292, 2975, 2932, 1704, 1644, 1530, 1506, 1391, 1312, 1235, 1160, 1078, 1044, 755. HRMS (ESI) calculated for C<sub>40</sub>H<sub>51</sub>N<sub>3</sub>O<sub>7</sub>Na [M+Na]<sup>+</sup> *m/z* 708.3613, found 708.3625.

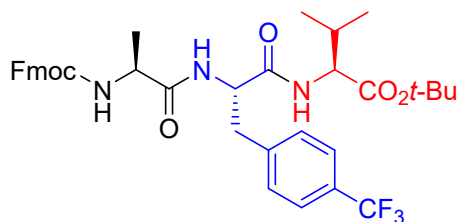

**Fmoc-L-Ala-L-Phe(4-CF<sub>3</sub>)-L-Val-O*t*-Bu (5x)** was prepared following **General Procedure 1** using



H-L-Phe(4-CF<sub>3</sub>)-OH (58.3 mg, 0.250 mmol) and trimethylaluminum 2M in hexane (250  $\mu$ L, 0.500 mmol), the resulting mixture was stirred in DCM under N<sub>2</sub> atmosphere at 0 °C. After 1 h, L-Val-O*t*-Bu (86.6 mg, 0.500 mmol) was added. The mixture was stirred under N<sub>2</sub> atmosphere at ambient temperature. After 24 h, Fmoc-L-Ala-Cl (247 mg, 0.750 mmol) and pivalic acid (2.55 mg, 0.025 mmol) were added into the reaction solution and stirring under N<sub>2</sub> atmosphere at room temperature for 24 h. The reaction mixture was purified by flash column chromatography (40% AcOEt in hexane) to provide the title compound as a white solid in 89% yield with >20:1 dr (152 mg).

R<sub>f</sub> = 0.42 (50% AcOEt in hexane). M.p. 125–130 °C. [ $\alpha$ ]<sub>D</sub><sup>21</sup> = –53.9 (*c* 1.01, CHCl<sub>3</sub>). <sup>1</sup>H NMR (400 MHz, CDCl<sub>3</sub>)  $\delta$  7.73 (d, *J* = 7.6 Hz, 2H, C<sub>12</sub>H<sub>8</sub>CHCH<sub>2</sub>OCONH), 7.59–7.55 (m, 2H, C<sub>12</sub>H<sub>8</sub>CHCH<sub>2</sub>OCONH), 7.44 (d, *J* = 8.0 Hz, 2H, CHCH<sub>2</sub>C<sub>6</sub>H<sub>4</sub>CF<sub>3</sub>), 7.39–7.34 (m, 2H, C<sub>12</sub>H<sub>8</sub>CHCH<sub>2</sub>OCONH), 7.28–7.24 (m, 5H, CHCH<sub>2</sub>C<sub>6</sub>H<sub>4</sub>CF<sub>3</sub> and C<sub>12</sub>H<sub>8</sub>CHCH<sub>2</sub>OCONH and NH), 6.99 (br d, *J* = 8.5 Hz, 1H, NH), 5.95 (br d, *J* = 7.8 Hz, 1H, NH), 4.93 (quin, *J* = 6.9 Hz 1H, CHCH<sub>3</sub>), 4.45–4.28 (m, 4H, C<sub>12</sub>H<sub>8</sub>CHCH<sub>2</sub>OCONH and CHCH(CH<sub>3</sub>)<sub>2</sub> and CHCH<sub>2</sub>C<sub>6</sub>H<sub>4</sub>CF<sub>3</sub>), 4.19 (t, *J* = 7.1 Hz, C<sub>12</sub>H<sub>8</sub>CHCH<sub>2</sub>OCONH), 3.13 (dd, *J* = 6.6 Hz and 14 Hz, 1H, CHCH<sub>2</sub>C<sub>6</sub>H<sub>4</sub>CF<sub>3</sub>), 3.02 (dd, *J* = 6.9 Hz and 14 Hz, 1H, CHCH<sub>2</sub>C<sub>6</sub>H<sub>4</sub>CF<sub>3</sub>), 2.10–2.04 (m, 1H, CHCH(CH<sub>3</sub>)<sub>2</sub>), 1.41 (s, 9H, CO<sub>2</sub>C(CH<sub>3</sub>)<sub>3</sub>), 1.31 (d, *J* = 6.9 Hz, 3H, CHCH<sub>3</sub>), 0.84 (d, *J* = 6.6 Hz, 3H, CHCH(CH<sub>3</sub>)<sub>2</sub>), 0.81 (d, *J* = 6.6 Hz, 3H, CHCH(CH<sub>3</sub>)<sub>2</sub>). <sup>13</sup>C NMR (100 MHz, CDCl<sub>3</sub>)  $\delta$  172.6, 170.4, 170.0, 156.0, 143.8, 143.7, 141.2 (2C), 140.4, 129.7 (2C), 129.1 (*J*<sub>FC</sub> = 32.4 Hz), 127.7 (2C), 127.0 (2C), 125.3–125.0, 123.0 (*J*<sub>FC</sub> = 270.8 Hz), 119.9 (2C), 82.1, 67.2, 57.5, 54.0, 50.4, 47.0, 38.1, 31.3, 27.9 (3C), 18.7, 17.6 IR (thin film, cm<sup>-1</sup>) 3291, 2966, 1705, 1644, 1507, 1449, 1391, 1313, 1215, 1113, 1075, 1042, 755. HRMS (ESI) calculated for C<sub>37</sub>H<sub>42</sub>F<sub>3</sub>N<sub>3</sub>O<sub>6</sub>Na [M+Na]<sup>+</sup> *m/z* 704.2923, found 704.2911.

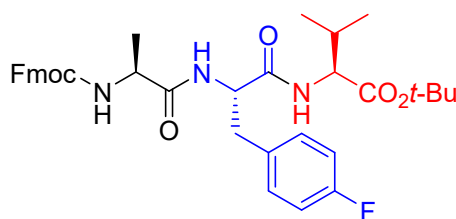

**Fmoc-L-Ala-L-Phe(4-F)-L-Val-O*t*-Bu (5y)** was prepared following **General Procedure 1** using H-L-Phe(4-F)-OH (45.5 mg, 0.250 mmol) and trimethylaluminum 2M in hexane (250  $\mu$ L, 0.500 mmol), the resulting mixture was stirred in DCM under N<sub>2</sub> atmosphere at 0 °C. After 1 h, L-Val-O*t*-Bu (86.6 mg, 0.500 mmol) was added. The mixture was stirred under N<sub>2</sub> atmosphere at ambient temperature. After 24 h, Fmoc-L-Ala-Cl (247 mg, 0.750 mmol) and pivalic acid (2.55 mg, 0.025 mmol) were added into the reaction solution and stirring under N<sub>2</sub> atmosphere at room temperature for 24 h. The reaction mixture was purified by flash column chromatography (40% AcOEt in hexane) to provide the title compound as a white solid in 93% yield with >20:1 dr (147 mg).

R<sub>f</sub> = 0.62 (50% AcOEt in hexane). M.p. 170–175 °C. [ $\alpha$ ]<sub>D</sub><sup>21</sup> = –34.9 (*c* 1.03, CHCl<sub>3</sub>). <sup>1</sup>H NMR (400

MHz, CDCl<sub>3</sub>)  $\delta$  7.72 (d,  $J$  = 6.9 Hz, 2H, C<sub>12</sub>H<sub>8</sub>CHCH<sub>2</sub>OCONH), 7.58 (t,  $J$  = 8.7 Hz, 2H, C<sub>12</sub>H<sub>8</sub>CHCH<sub>2</sub>OCONH), 7.39–7.25 (m, 5H, C<sub>12</sub>H<sub>8</sub>CHCH<sub>2</sub>OCONH and NH), 7.10–7.06 (m, 3H, CHCH<sub>2</sub>C<sub>6</sub>H<sub>4</sub>F and NH), 6.88–6.85 (m, 2H, CHCH<sub>2</sub>C<sub>6</sub>H<sub>4</sub>F), 6.08 (br d,  $J$  = 8.0 Hz, 1H, NH), 4.91 (quin,  $J$  = 6.9 Hz 1H, CHCH<sub>3</sub>), 4.50–4.30 (m, 4H, C<sub>12</sub>H<sub>8</sub>CHCH<sub>2</sub>OCONH, CHCH(CH<sub>3</sub>)<sub>2</sub>, CHCH<sub>2</sub>C<sub>6</sub>H<sub>4</sub>F), 4.19 (t,  $J$  = 7.3 Hz, C<sub>12</sub>H<sub>8</sub>CHCH<sub>2</sub>OCONH), 2.99 (d quin.,  $J$  = 6.9 Hz and 17 Hz, 2H, CHCH<sub>2</sub>C<sub>6</sub>H<sub>4</sub>F), 2.11–2.04 (m, 1H, CHCH(CH<sub>3</sub>)<sub>2</sub>), 1.41 (s, 9H, CO<sub>2</sub>C(CH<sub>3</sub>)<sub>3</sub>), 1.33 (d,  $J$  = 6.9 Hz, 3H, CHCH<sub>3</sub>), 0.84 (d,  $J$  = 6.6 Hz, 3H, CHCH(CH<sub>3</sub>)<sub>2</sub>), 0.81 (d,  $J$  = 6.6 Hz, 3H, CHCH(CH<sub>3</sub>)<sub>2</sub>). <sup>13</sup>C NMR (100 MHz, CDCl<sub>3</sub>)  $\delta$  172.7, 170.5, 170.4, 161.7 ( $J_{FC}$  = 243.1 Hz), 156.1, 143.9, 143.7, 141.2 (2C), 131.9, 130.8 ( $J_{FC}$  = 7.6 Hz, 2C), 127.6 (2C), 127.0 (2C), 125.1 (2C), 119.8 (2C), 115.1 ( $J_{FC}$  = 21.0 Hz, 2C), 81.9, 67.2, 57.3, 54.3, 50.2, 47.0, 37.8, 31.5, 27.9 (3C), 19.0, 18.7, 17.6. IR (thin film, cm<sup>-1</sup>) 3294, 2969, 1704, 1643, 1509, 1449, 1393, 1313, 1218, 1113, 1078, 1042, 755. HRMS (ESI) calculated for C<sub>36</sub>H<sub>42</sub>FN<sub>3</sub>O<sub>6</sub>Na [M+Na]<sup>+</sup>  $m/z$  654.2955, found 654.2938.

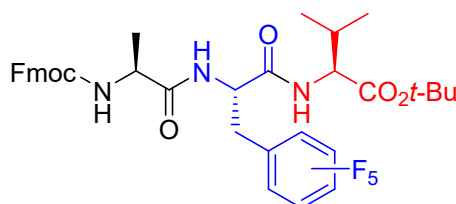

**Fmoc-L-Ala-L-Phe(F<sub>5</sub>)-L-Val-Ot-Bu (5z)** was prepared following **General Procedure 1** using H-L-Phe(F<sub>5</sub>)-OH (63.8 mg, 0.250 mmol) and trimethylaluminum 2M in hexane (250  $\mu$ L, 0.500 mmol), the resulting mixture was stirred in DCM under N<sub>2</sub> atmosphere at 0 °C. After 1 h, L-Val-Ot-Bu (86.6 mg, 0.500 mmol) was added. The mixture was stirred under N<sub>2</sub> atmosphere at ambient temperature. After 24 h, Fmoc-L-Ala-Cl (247 mg, 0.750 mmol) and pivalic acid (2.55 mg, 0.025 mmol) were added into the reaction solution and stirring under N<sub>2</sub> atmosphere at room temperature for 24 h. The reaction mixture was purified by flash column chromatography (33% AcOEt in hexane) to provide the title compound as a white solid in 89% yield with >20:1 dr (156 mg).

$R_f$  = 0.65 (50% AcOEt in hexane). M.p. 190–195 °C.  $[\alpha]_D^{21}$  = -94.1 ( $c$  1.01, CHCl<sub>3</sub>). <sup>1</sup>H NMR (400 MHz, DMSO-d<sub>6</sub>)  $\delta$  8.11 (t,  $J$  = 8.7 Hz, 2H, C<sub>12</sub>H<sub>8</sub>CHCH<sub>2</sub>OCONH), 7.86 (d,  $J$  = 7.6 Hz, 2H, C<sub>12</sub>H<sub>8</sub>CHCH<sub>2</sub>OCONH), 7.68 (t,  $J$  = 8.2 Hz, 2H, C<sub>12</sub>H<sub>8</sub>CHCH<sub>2</sub>OCONH), 7.54 (d,  $J$  = 7.4 Hz, 1H, NH), 7.42–7.29 (m, 4H, C<sub>12</sub>H<sub>8</sub>CHCH<sub>2</sub>OCONH and NH), 4.71 (quin,  $J$  = 7.6 Hz 1H, CHCH<sub>3</sub>), 4.24–3.97 (m, 5H, C<sub>12</sub>H<sub>8</sub>CHCH<sub>2</sub>OCONH, C<sub>12</sub>H<sub>8</sub>CHCH<sub>2</sub>OCONH, CHCH(CH<sub>3</sub>)<sub>2</sub>, CHCH<sub>2</sub>C<sub>6</sub>F<sub>5</sub>), 3.06 (dd,  $J$  = 7.1 Hz and 13.7 Hz, 1H, CHCH<sub>2</sub>C<sub>6</sub>F<sub>5</sub>), 2.92 (dd,  $J$  = 7.6 Hz and 13.7 Hz, 1H, CHCH<sub>2</sub>C<sub>6</sub>F<sub>5</sub>), 2.03–1.90 (m, 1H, CHCH(CH<sub>3</sub>)<sub>2</sub>), 1.38 (s, 9H, CO<sub>2</sub>C(CH<sub>3</sub>)<sub>3</sub>), 1.14 (d,  $J$  = 7.6 Hz, 3H, CHCH<sub>3</sub>), 0.82 (d,  $J$  = 6.9 Hz, 3H, CHCH(CH<sub>3</sub>)<sub>2</sub>), 0.81 (d,  $J$  = 6.9 Hz, 3H, CHCH(CH<sub>3</sub>)<sub>2</sub>). <sup>13</sup>C NMR (100 MHz, DMSO-d<sub>6</sub>)  $\delta$  173.2, 170.8, 170.5, 156.4, 146.0 ( $J_{FC}$  = 244.1 Hz), 144.6, 144.5, 141.4 (2C), 140.0 (2C,  $J_{FC}$  = 241.6 Hz), 137.4 (2C,  $J_{FC}$  = 242.2 Hz), 128.3 (2C), 127.8 (2C), 126.0, 125.9, 120.8 (2C),

111.8 ( $J_{\text{FC}} = 16.2$  Hz), 81.4, 66.4, 58.4, 50.9, 50.5, 48.7, 31.0, 28.3 (3C), 26.2, 19.5, 18.7, 18.5. IR (thin film,  $\text{cm}^{-1}$ ) 3291, 2966, 1701, 1645, 1505, 1449, 1393, 1311, 1211, 1115, 1075, 1045, 765. HRMS (ESI) calculated for  $\text{C}_{36}\text{H}_{38}\text{F}_5\text{N}_3\text{O}_6\text{Na}$   $[\text{M}+\text{Na}]^+$   $m/z$  726.2578, found 726.2534.

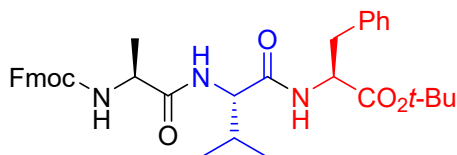

**Fmoc-L-Ala-L-Val-L-Phe-Ot-Bu (5aa)** was prepared following **General Procedure 1** using H-L-Val-OH (29.3 mg, 0.250 mmol) and trimethylaluminum 2M in hexane (250  $\mu\text{L}$ , 0.500 mmol), the resulting mixture was stirred in DCM under  $\text{N}_2$  atmosphere at 0  $^\circ\text{C}$ . After 1 h, L-Phe-Ot-Bu (111 mg, 0.500 mmol) was added. The mixture was stirred under  $\text{N}_2$  atmosphere at ambient temperature. After 24 h, Fmoc-L-Ala-Cl (247 mg, 0.750 mmol) and pivalic acid (2.55 mg, 0.025 mmol) were added into the reaction solution and stirring under  $\text{N}_2$  atmosphere at room temperature for 24 h. The reaction mixture was purified by flash column chromatography (45% AcOEt in hexane) to provide the title compound as a white solid in 92% yield with  $>20:1$  dr (141 mg).

$R_f = 0.49$  (50% AcOEt in hexane). M.p. 200–205  $^\circ\text{C}$ .  $[\alpha]_{\text{D}}^{22} = -32.4$  ( $c$  1.03,  $\text{CHCl}_3$ ).  $^1\text{H}$  NMR (400 MHz,  $\text{CDCl}_3$ )  $\delta$  7.70 (d,  $J = 7.3$  Hz, 2H,  $\text{C}_{12}\text{H}_8\text{CHCH}_2\text{OCONH}$ ), 7.57 (d,  $J = 7.3$  Hz, 2H,  $\text{C}_{12}\text{H}_8\text{CHCH}_2\text{OCONH}$ ), 7.44–7.42 (m, 2H,  $\text{NH}$  and  $\text{NH}$ ), 7.33 (t,  $J = 7.6$  Hz, 2H,  $\text{C}_{12}\text{H}_8\text{CHCH}_2\text{OCONH}$ ), 7.25–7.20 (m, 2H,  $\text{C}_{12}\text{H}_8\text{CHCH}_2\text{OCONH}$ ), 7.18–7.05 (m, 5H,  $\text{CHCH}_2\text{C}_6\text{H}_5$ ), 6.45 (d,  $J = 8.2$  Hz, 1H,  $\text{NH}$ ), 4.81 (dd,  $J = 6.2$  Hz and 14 Hz 1H,  $\text{CHCH}_2\text{Ph}$ ), 4.64–4.58 (m, 2H,  $\text{CHCH}(\text{CH}_3)_2$  and  $\text{CHCH}_3$ ), 4.34–4.24 (m, 2H,  $\text{C}_{12}\text{H}_8\text{CHCH}_2\text{OCONH}$ ), 4.16 (t,  $J = 7.3$  Hz, 1H,  $\text{C}_{12}\text{H}_8\text{CHCH}_2\text{OCONH}$ ), 2.98 (d,  $J = 6.2$  Hz, 2H,  $\text{CHCH}_2\text{Ph}$ ), 2.10–2.02 (m, 1H,  $\text{CHCH}(\text{CH}_3)_2$ ), 1.34 (d,  $J = 6.9$  Hz, 3H,  $\text{CHCH}_3$ ), 1.29 (s, 9H,  $\text{CO}_2\text{C}(\text{CH}_3)_3$ ), 0.96 (d,  $J = 6.9$  Hz, 3H,  $\text{CHCH}(\text{CH}_3)_2$ ), 0.93 (d,  $J = 6.9$  Hz, 3H,  $\text{CHCH}(\text{CH}_3)_2$ ).  $^{13}\text{C}$  NMR (100 MHz,  $\text{CDCl}_3$ )  $\delta$  172.6, 170.6, 170.3, 156.0, 143.8(2C), 141.2(2C), 136.0, 129.4(2C), 128.2(2C), 127.6(2C), 126.9 (2C), 126.8, 125.1 (2C), 119.8 (2C), 82.1, 67.1, 58.3, 53.6, 50.4, 47.0, 38.2, 31.4, 27.8(3C), 19.0(2C), 18.3. IR (thin film,  $\text{cm}^{-1}$ ) 3290, 3063, 3019, 2970, 1732, 1693, 1643, 1539, 1451, 1392, 1322, 1229, 1216, 1153, 1119, 1085, 1046, 754. HRMS (ESI) calculated for  $\text{C}_{36}\text{H}_{43}\text{N}_3\text{O}_6\text{Na}$   $[\text{M}+\text{Na}]^+$   $m/z$  636.3031, found 636.3049.

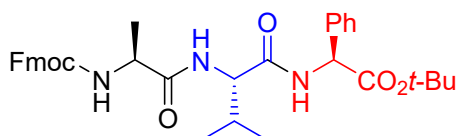

**Fmoc-L-Ala-L-Val-L-Phe-Ot-Bu (5ab)** was prepared following **General Procedure 1** using H-L-Val-OH (29.3 mg, 0.250 mmol) and trimethylaluminum 2M in hexane (250  $\mu\text{L}$ , 0.500 mmol), the

resulting mixture was stirred in DCM under N<sub>2</sub> atmosphere at 0 °C. After 1 h, L-Phg-Ot-Bu (104 mg, 0.500 mmol) was added. The mixture was stirred under N<sub>2</sub> atmosphere at ambient temperature. After 24 h, Fmoc-L-Ala-Cl (247 mg, 0.750 mmol) and pivalic acid (2.55 mg, 0.025 mmol) were added into the reaction solution and stirring under N<sub>2</sub> atmosphere at room temperature for 24 h. The reaction mixture was purified by flash column chromatography (45% AcOEt in hexane) to provide the title compound as a white solid in 91% yield with >20:1 dr (136 mg).

R<sub>f</sub> = 0.48 (50% AcOEt in hexane). M.p. 205–210 °C. [α]<sub>D</sub><sup>20</sup> = –70.0 (*c* 1.01, CHCl<sub>3</sub>). <sup>1</sup>H NMR (400 MHz, CDCl<sub>3</sub>) δ 7.81 (br d, *J* = 7.3 Hz, NH), 7.71 (d, *J* = 7.1 Hz, 2H, C<sub>12</sub>H<sub>8</sub>CHCH<sub>2</sub>OCONH), 7.55 (d, *J* = 6.2 Hz, 2H, C<sub>12</sub>H<sub>8</sub>CHCH<sub>2</sub>OCONH), 7.36–7.21 (m, 7H, CHC<sub>6</sub>H<sub>5</sub> and C<sub>12</sub>H<sub>8</sub>CHCH<sub>2</sub>OCONH and NH), 7.14–7.12 (m, 3H, CHC<sub>6</sub>H<sub>5</sub>), 6.14 (d, *J* = 8.2 Hz, 1H, NH), 5.52 (d, *J* = 7.6 Hz, 1H, CHPh), 4.67 (quin., *J* = 7.8 Hz, 1H, CHCH<sub>3</sub>), 4.46 (t, *J* = 6.2 Hz, 1H, CHCH(CH<sub>3</sub>)<sub>2</sub>), 4.32–4.22 (m, 2H, C<sub>12</sub>H<sub>8</sub>CHCH<sub>2</sub>OCONH), 4.14 (t, *J* = 7.3 Hz, 1H, C<sub>12</sub>H<sub>8</sub>CHCH<sub>2</sub>OCONH), 2.16–2.05 (m, 1H, CHCH(CH<sub>3</sub>)<sub>2</sub>), 1.34 (s, 9H, CO<sub>2</sub>C(CH<sub>3</sub>)<sub>3</sub>), 1.19 (d, *J* = 6.9 Hz, 3H, CHCH<sub>3</sub>), 0.98 (d, *J* = 6.9 Hz, 3H, CHCH(CH<sub>3</sub>)<sub>2</sub>), 0.93 (d, *J* = 6.9 Hz, 3H, CHCH(CH<sub>3</sub>)<sub>2</sub>). <sup>13</sup>C NMR (100 MHz, CDCl<sub>3</sub>) δ 172.8, 170.6, 169.6, 156.0, 143.9, 143.8, 141.1(2C), 136.6, 128.5(3C), 128.0, 127.5(2C), 126.9(3C), 125.1(2C), 119.8(2C), 82.3, 67.0, 58.1, 56.9, 50.2, 47.0, 31.5, 27.7(3C), 19.0, 18.9, 18.3. IR (thin film, cm<sup>-1</sup>) 3295, 3063, 2966, 2931, 1705, 1645, 1531, 1475, 1455, 1395, 1313, 1221, 1143, 1113, 1078, 1045, 757. HRMS (ESI) calculated for C<sub>35</sub>H<sub>41</sub>N<sub>3</sub>O<sub>6</sub>Na [M+Na]<sup>+</sup> *m/z* 622.2867, found 622.2887.

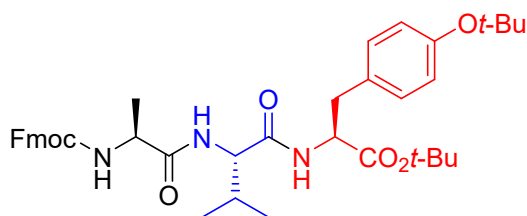

**Fmoc-L-Ala-L-Val-L-Tyr(*t*-Bu)-Ot-Bu (5ac)** was prepared following **General Procedure 1** using H-L-Val-OH (29.3 mg, 0.250 mmol) and trimethylaluminum 2M in hexane (250 μL, 0.500 mmol), the resulting mixture was stirred in DCM under N<sub>2</sub> atmosphere at 0 °C. After 1 h, L-Tyr(*t*-Bu)-Ot-Bu (147 mg, 0.500 mmol) was added. The mixture was stirred under N<sub>2</sub> atmosphere at ambient temperature. After 24 h, Fmoc-L-Ala-Cl (247 mg, 0.750 mmol) and pivalic acid (2.55 mg, 0.025 mmol) were added into the reaction solution and stirring under N<sub>2</sub> atmosphere at room temperature for 24 h. The reaction mixture was purified by flash column chromatography (40% AcOEt in hexane) to provide the title compound as a white solid in 86% yield with >20:1 dr (142 mg).

R<sub>f</sub> = 0.52 (50% AcOEt in hexane). M.p. 120–125 °C. [α]<sub>D</sub><sup>19</sup> = –65.2 (*c* 1.01, CHCl<sub>3</sub>). <sup>1</sup>H NMR (400 MHz, CDCl<sub>3</sub>) δ 7.71 (d, *J* = 7.6 Hz, 2H, C<sub>12</sub>H<sub>8</sub>CHCH<sub>2</sub>OCONH), 7.57 (dd, *J* = 2.8 Hz and 7.3 Hz, 2H, C<sub>12</sub>H<sub>8</sub>CHCH<sub>2</sub>OCONH), 7.35 (t, *J* = 7.3 Hz, 2H, C<sub>12</sub>H<sub>8</sub>CHCH<sub>2</sub>OCONH), 7.29–7.22 (m, 2H, C<sub>12</sub>H<sub>8</sub>CHCH<sub>2</sub>OCONH), 7.18 (br d, *J* = 7.6 Hz, 1H, NH), 6.97 (d, *J* = 8.5 Hz, 2H,

CHCH<sub>2</sub>C<sub>6</sub>H<sub>4</sub>OC(CH<sub>3</sub>)<sub>3</sub>, 6.81 (d, *J* = 8.5 Hz, 2H, CHCH<sub>2</sub>C<sub>6</sub>H<sub>4</sub>OC(CH<sub>3</sub>)<sub>3</sub>), 6.23 (br d, *J* = 7.8 Hz, 1H, NH), 4.71 (quin, *J* = 6.4 Hz 1H, CHCH<sub>3</sub>), 4.55–4.53 (m, 2H, CHCH(CH<sub>3</sub>)<sub>2</sub> and CHCH<sub>2</sub>C<sub>6</sub>H<sub>4</sub>OC(CH<sub>3</sub>)<sub>3</sub>), 4.37–4.30 (m, 2H, C<sub>12</sub>H<sub>8</sub>CHCH<sub>2</sub>OCONH), 4.19 (t, *J* = 7.3 Hz, C<sub>12</sub>H<sub>8</sub>CHCH<sub>2</sub>OCONH), 2.98 (dd, *J* = 5.5 Hz and 14 Hz, 2H, CHCH<sub>2</sub>C<sub>6</sub>H<sub>4</sub>OC(CH<sub>3</sub>)<sub>3</sub>), 2.91 (dd, *J* = 7.4 Hz and 14 Hz, 2H, CHCH<sub>2</sub>C<sub>6</sub>H<sub>4</sub>OC(CH<sub>3</sub>)<sub>3</sub>), 2.14–2.04 (m, 1H, CHCH(CH<sub>3</sub>)<sub>2</sub>), 1.38 (d, *J* = 6.9 Hz, 3H, CHCH<sub>3</sub>), 1.29 (s, 9H, CO<sub>2</sub>C(CH<sub>3</sub>)<sub>3</sub>), 1.28 (s, 9H, CHCH<sub>2</sub>C<sub>6</sub>H<sub>4</sub>OC(CH<sub>3</sub>)<sub>3</sub>), 0.94 (d, *J* = 6.9 Hz, 3H, CHCH(CH<sub>3</sub>)<sub>2</sub>), 0.92 (d, *J* = 6.9 Hz, 3H, CHCH(CH<sub>3</sub>)<sub>2</sub>). <sup>13</sup>C NMR (100 MHz, CDCl<sub>3</sub>) δ 172.7, 170.6, 170.5, 156.0, 154.1, 143.8, 143.7, 141.1(2C), 130.9, 129.8(2C), 127.6(2C), 127.0(2C), 125.1(2C), 124.0(2C), 119.8(2C), 82.0, 78.2, 67.1, 58.3, 53.8, 50.4, 47.0, 37.7, 31.5, 28.7(3C), 27.6(3C), 19.0, 18.9, 18.3. IR (thin film, cm<sup>-1</sup>) 3231, 3015, 2923, 1704, 1644, 1515, 1391, 1312, 1238, 1160, 1078, 1044, 765. HRMS (ESI) calculated for C<sub>40</sub>H<sub>51</sub>N<sub>3</sub>O<sub>7</sub>Na [M+Na]<sup>+</sup> *m/z* 708.3625, found 708.3619.

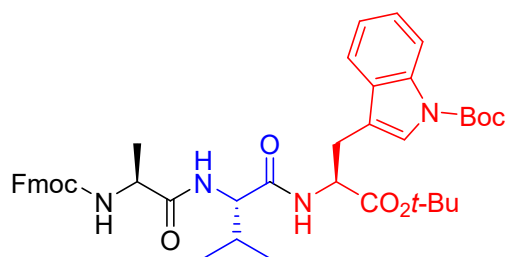

**Fmoc-L-Ala-L-Val-L-Trp(Boc)-Ot-Bu (5ad)** was prepared following **General Procedure 1** using H-L-Val-OH (29.3 mg, 0.250 mmol) and trimethylaluminum 2M in hexane (250 μL, 0.500 mmol), the resulting mixture was stirred in DCM under N<sub>2</sub> atmosphere at 0 °C. After 1 h, L-Trp(Boc)-Ot-Bu (180 mg, 0.500 mmol) was added. The mixture was stirred under N<sub>2</sub> atmosphere at ambient temperature. After 24 h, Fmoc-L-Ala-Cl (247 mg, 0.750 mmol) and pivalic acid (2.55 mg, 0.025 mmol) were added into the reaction solution and stirring under N<sub>2</sub> atmosphere at room temperature for 24 h. The reaction mixture was purified by flash column chromatography (45% AcOEt in hexane) to provide the title compound as a white solid in 43% yield with >20:1 dr (80.9 mg).

R<sub>f</sub> = 0.48 (50% AcOEt in hexane). M.p. 160–165 °C. [α]<sub>D</sub><sup>21</sup> = -7.7 (*c* 1.04, CHCl<sub>3</sub>). <sup>1</sup>H NMR (400 MHz, CDCl<sub>3</sub>) δ 8.10 (br d, *J* = 7.8 Hz, 1H, CHCH<sub>2</sub>IndH(Boc)), 7.72 (d, *J* = 7.1 Hz, 2H, C<sub>12</sub>H<sub>8</sub>CHCH<sub>2</sub>OCONH), 7.55 (d, *J* = 6.4 Hz, 2H, C<sub>12</sub>H<sub>8</sub>CHCH<sub>2</sub>OCONH), 7.48 (br d, *J* = 7.8 Hz, 1H, CHCH<sub>2</sub>IndH(Boc)), 7.40–7.34 (m, 3H, C<sub>12</sub>H<sub>8</sub>CHCH<sub>2</sub>OCONH and CHCH<sub>2</sub>IndH(Boc)), 7.30–7.18 (m, 4H, C<sub>12</sub>H<sub>8</sub>CHCH<sub>2</sub>OCONH and CHCH<sub>2</sub>IndH(Boc)), 6.87 (br d, *J* = 8.5 Hz, 1H, NH), 6.79 (br d, *J* = 6.9 Hz, 1H, NH), 5.81 (d, *J* = 7.6 Hz, 1H, NH), 4.83 (quin, *J* = 7.1 Hz 1H, CHCH<sub>3</sub>), 4.39–4.34 (m, 4H, C<sub>12</sub>H<sub>8</sub>CHCH<sub>2</sub>OCONH, CHCH(CH<sub>3</sub>)<sub>2</sub>, CHCH<sub>2</sub>Ind(Boc)), 4.18 (t, *J* = 7.1 Hz, 1H, C<sub>12</sub>H<sub>8</sub>CHCH<sub>2</sub>OCONH), 3.16 (d, *J* = 5.2 Hz 2H, CHCH<sub>2</sub>Ind(Boc)), 2.14–2.06 (m, 1H, CHCH(CH<sub>3</sub>)<sub>2</sub>), 1.64 (s, 9H, CHCH<sub>2</sub>Ind(CO<sub>2</sub>C(CH<sub>3</sub>)<sub>3</sub>), 1.34 (s, 9H, CO<sub>2</sub>C(CH<sub>3</sub>)<sub>3</sub>), 1.34–1.33 (m, 3H,

CHCH<sub>3</sub>), 0.92 (d,  $J = 6.9$  Hz, 3H, CHCH(CH<sub>3</sub>)<sub>2</sub>), 0.90 (d,  $J = 6.9$  Hz, 3H, CHCH(CH<sub>3</sub>)<sub>2</sub>). <sup>13</sup>C NMR (100 MHz, CDCl<sub>3</sub>)  $\delta$  172.3, 170.5, 170.3, 156.0, 149.4, 143.8, 143.7, 141.2(2C), 135.3, 130.5, 127.6(2C), 127.0(2C), 125.1(2C), 124.5, 124.0, 122.6, 119.9(2C), 119.0, 115.2, 115.1, 83.5, 82.4, 67.0, 58.2, 53.0, 50.5, 47.0, 31.4, 28.1(3C), 27.8(3C), 27.7, 19.0, 18.8, 18.0. IR (thin film, cm<sup>-1</sup>) 3285, 2975, 2933, 1731, 1639, 1528, 1451, 1368, 1340, 1308, 1253, 1228, 1155, 1085, 1043, 1019, 756. HRMS (ESI) calculated for C<sub>43</sub>H<sub>52</sub>N<sub>4</sub>O<sub>8</sub>Na [M+Na]<sup>+</sup>  $m/z$  775.3683, found 775.3689.

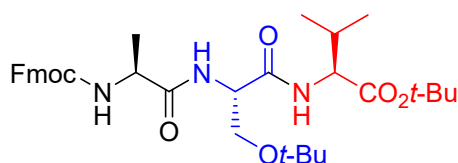

**Fmoc-L-Ala-L-Ser(*t*-Bu)-L-Val-O*t*-Bu (5ae)** was prepared following **General Procedure 1** using H-L-Ser(*t*-Bu)-OH (40.3 mg, 0.250 mmol) and trimethylaluminum 2M in hexane (250  $\mu$ L, 0.500 mmol), the resulting mixture was stirred in DCM under N<sub>2</sub> atmosphere at 0 °C. After 1 h, L-Val-O*t*-Bu (86.6 mg, 0.500 mmol) was added. The mixture was stirred under N<sub>2</sub> atmosphere at ambient temperature. After 24 h, Fmoc-L-Ala-Cl (247 mg, 0.750 mmol) and pivalic acid (2.55 mg, 0.025 mmol) were added into the reaction solution and stirring under N<sub>2</sub> atmosphere at room temperature for 24 h. The reaction mixture was purified by flash column chromatography (45% AcOEt in hexane) to provide the title compound as a white solid in 93% yield with >20:1 dr (142 mg).

$R_f = 0.42$  (50% AcOEt in hexane). M.p. 110–115 °C.  $[\alpha]_D^{20} = -61.5$  ( $c$  1.01, CHCl<sub>3</sub>). <sup>1</sup>H NMR (400 MHz, CDCl<sub>3</sub>)  $\delta$  7.75 (d,  $J = 7.6$  Hz, 2H, C<sub>12</sub>H<sub>8</sub>CHCH<sub>2</sub>OCONH), 7.58 (d,  $J = 7.3$  Hz, 2H, C<sub>12</sub>H<sub>8</sub>CHCH<sub>2</sub>OCONH and NH), 7.39 (t,  $J = 7.6$  Hz, 2H, C<sub>12</sub>H<sub>8</sub>CHCH<sub>2</sub>OCONH), 7.32–7.26 (m, 3H, C<sub>12</sub>H<sub>8</sub>CHCH<sub>2</sub>OCONH), 6.89 (br d,  $J = 6.0$  Hz, 1H, NH), 5.54 (br d,  $J = 6.9$  Hz, 1H, NH), 4.46–4.28 (m, 5H, CHCH<sub>2</sub>OC(CH<sub>3</sub>)<sub>3</sub> and C<sub>12</sub>H<sub>8</sub>CHCH<sub>2</sub>OCONH and CHCH<sub>3</sub> and CHCH(CH<sub>3</sub>)<sub>2</sub>), 4.21 (t,  $J = 6.9$  Hz, 1H, C<sub>12</sub>H<sub>8</sub>CHCH<sub>2</sub>OCONH), 3.82 (dd,  $J = 3.2$  Hz, and 8.2 Hz, 1H, CHCH<sub>2</sub>OC(CH<sub>3</sub>)<sub>3</sub>), 3.71 (dd,  $J = 8.0$  Hz, and 8.2 Hz, 1H, CHCH<sub>2</sub>OC(CH<sub>3</sub>)<sub>3</sub>), 2.19–2.10 (m, 1H, CHCH(CH<sub>3</sub>)<sub>2</sub>), 1.46 (s, 9H, CO<sub>2</sub>C(CH<sub>3</sub>)<sub>3</sub>), 1.44 (d,  $J = 6.9$  Hz, 3H, CHCH<sub>3</sub>), 1.21 (s, 9H, CHCH<sub>2</sub>OC(CH<sub>3</sub>)<sub>3</sub>), 0.92 (d,  $J = 8.7$  Hz, 3H, CHCH(CH<sub>3</sub>)<sub>2</sub>), 0.90 (d,  $J = 8.7$  Hz, 3H, CHCH(CH<sub>3</sub>)<sub>2</sub>). <sup>13</sup>C NMR (100 MHz, CDCl<sub>3</sub>)  $\delta$  172.1, 170.4, 169.9, 155.8, 143.8, 143.7, 141.2(2C), 127.6(2C), 127.0(2C), 125.0(2C), 119.9(2C), 81.7, 74.3, 67.0, 61.2, 57.7, 52.9, 50.6, 47.1, 31.2, 27.9(3C), 27.3(3C), 19.0, 18.9, 17.6. IR (thin film, cm<sup>-1</sup>) 3291, 3065, 2969, 2935, 1705, 1644, 1535, 1474, 1450, 1391, 1313, 1221, 1143, 1115, 1078, 1045, 757. HRMS (ESI) calculated for C<sub>34</sub>H<sub>47</sub>N<sub>3</sub>O<sub>7</sub>Na [M+Na]<sup>+</sup>  $m/z$  632.3312, found 632.3310.

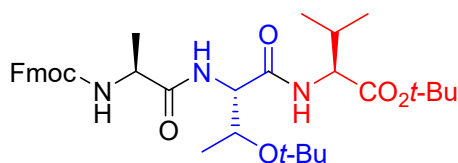

**Fmoc-L-Ala-L-Thr(*t*-Bu)-L-Val-O*t*-Bu (5af)** was prepared following **General Procedure 1** using H-L-Thr(*t*-Bu)-OH (43.8 mg, 0.250 mmol) and trimethylaluminum 2M in hexane (250  $\mu$ L, 0.500 mmol), the resulting mixture was stirred in DCM under N<sub>2</sub> atmosphere at 0 °C. After 1 h, L-Val-O*t*-Bu (86.6 mg, 0.500 mmol) was added. The mixture was stirred under N<sub>2</sub> atmosphere at ambient temperature. After 24 h, Fmoc-L-Ala-Cl (247 mg, 0.750 mmol) and pivalic acid (2.55 mg, 0.025 mmol) were added into the reaction solution and stirring under N<sub>2</sub> atmosphere at room temperature for 24 h. The reaction mixture was purified by flash column chromatography (35% AcOEt in hexane) to provide the title compound as a white solid in 91% yield with >20:1 dr (142 mg).

$R_f = 0.61$  (50% AcOEt in hexane). M.p. 100–105 °C.  $[\alpha]_D^{20} = -36.7$  ( $c$  1.01, CHCl<sub>3</sub>). <sup>1</sup>H NMR (400 MHz, CDCl<sub>3</sub>)  $\delta$  7.75 (d,  $J = 7.6$  Hz, 2H, C<sub>12</sub>H<sub>8</sub>CHCH<sub>2</sub>OCONH), 7.72 (br d,  $J = 8.7$  Hz, 1H, NH), 7.59 (d,  $J = 7.3$  Hz, 2H, C<sub>12</sub>H<sub>8</sub>CHCH<sub>2</sub>OCONH), 7.39 (t,  $J = 7.6$  Hz, 2H, C<sub>12</sub>H<sub>8</sub>CHCH<sub>2</sub>OCONH), 7.32–7.29 (m, 2H, C<sub>12</sub>H<sub>8</sub>CHCH<sub>2</sub>OCONH), 7.05 (br d,  $J = 7.0$  Hz, 1H, NH), 5.53 (d,  $J = 7.3$  Hz, 1H, NH), 4.38–4.32 (m, 5H, CHCH(CH<sub>3</sub>)OC(CH<sub>3</sub>)<sub>3</sub> and C<sub>12</sub>H<sub>8</sub>CHCH<sub>2</sub>OCONH and CHCH<sub>3</sub> and CHCH(CH<sub>3</sub>)<sub>2</sub>), 4.23–4.19 (m, 2H, C<sub>12</sub>H<sub>8</sub>CHCH<sub>2</sub>OCONH and CHCH(CH<sub>3</sub>)OC(CH<sub>3</sub>)<sub>3</sub>), 2.22–2.12 (m, 1H, CHCH(CH<sub>3</sub>)<sub>2</sub>), 1.47 (s, 9H, CO<sub>2</sub>C(CH<sub>3</sub>)<sub>3</sub>), 1.42 (d,  $J = 6.6$  Hz, 3H, CHCH<sub>3</sub>), 1.31 (s, 9H, CHCH(CH<sub>3</sub>)OC(CH<sub>3</sub>)<sub>3</sub>), 1.08 (d,  $J = 6.4$  Hz, 3H, CHCH(CH<sub>3</sub>)OC(CH<sub>3</sub>)<sub>3</sub>), 0.95 (d,  $J = 6.9$  Hz, 3H, CHCH(CH<sub>3</sub>)<sub>2</sub>), 0.92 (d,  $J = 6.9$  Hz, 3H, CHCH(CH<sub>3</sub>)<sub>2</sub>). <sup>13</sup>C NMR (100 MHz, CDCl<sub>3</sub>)  $\delta$  172.1, 170.2, 169.3, 155.6, 143.9, 143.8, 141.2(2C), 127.6(2C), 127.0(2C), 125.1(2C), 119.9(2C), 81.6, 75.5, 67.0, 66.2, 58.1, 57.3, 50.4, 47.1, 30.7, 28.2(3C), 28.0(3C), 19.2, 19.1, 17.5, 16.6. IR (thin film, cm<sup>-1</sup>) 3305, 3034, 2967, 2931, 1705, 1644, 1531, 1475, 1453, 1391, 1311, 1221, 1144, 1110, 1075, 1045, 756. HRMS (ESI) calculated for C<sub>35</sub>H<sub>49</sub>N<sub>3</sub>O<sub>7</sub>Na [M+Na]<sup>+</sup>  $m/z$  646.3468, found 646.3462.

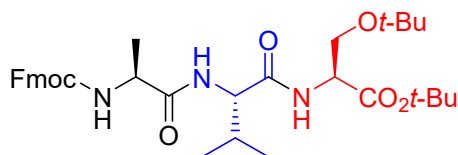

**Fmoc-L-Ala-L-Val-L-Ser(*t*-Bu)-O*t*-Bu (5ag)** was prepared following **General Procedure 1** using H-L-Val-OH (29.3 mg, 0.250 mmol) and trimethylaluminum 2M in hexane (250  $\mu$ L, 0.500 mmol), the resulting mixture was stirred in DCM under N<sub>2</sub> atmosphere at 0 °C. After 1 h, L-Ser(*t*-Bu)-O*t*-Bu (109 mg, 0.500 mmol) was added. The mixture was stirred under N<sub>2</sub> atmosphere at ambient temperature. After 24 h, Fmoc-L-Ala-Cl (247 mg, 0.750 mmol) and pivalic acid (2.55 mg, 0.025 mmol) were added into the reaction solution and stirring under N<sub>2</sub> atmosphere at room temperature

for 24 h. The reaction mixture was purified by flash column chromatography (45% AcOEt in hexane) to provide the title compound as a white solid in 91% yield with >20:1 dr (139 mg).

$R_f = 0.44$  (50% AcOEt in hexane). M.p. 150–155 °C.  $[\alpha]_D^{22} = -51.4$  ( $c$  1.07,  $\text{CHCl}_3$ ).  $^1\text{H NMR}$  (400 MHz,  $\text{CDCl}_3$ )  $\delta$  7.73 (d,  $J = 7.6$  Hz, 2H,  $\text{C}_{12}\text{H}_8\text{CHCH}_2\text{OCONH}$ ), 7.58 (d,  $J = 7.6$  Hz, 2H,  $\text{C}_{12}\text{H}_8\text{CHCH}_2\text{OCONH}$ ), 7.37 (t,  $J = 7.6$  Hz, 2H,  $\text{C}_{12}\text{H}_8\text{CHCH}_2\text{OCONH}$ ), 7.30–7.26 (m, 2H,  $\text{C}_{12}\text{H}_8\text{CHCH}_2\text{OCONH}$ ), 7.04 (br d,  $J = 8.7$  Hz, 1H,  $\text{NH}$ ), 6.81 (br d,  $J = 8.0$  Hz, 1H,  $\text{NH}$ ), 5.85 (d,  $J = 8.0$  Hz, 1H,  $\text{NH}$ ), 4.62 (d,  $J = 8.0$  Hz, 1H,  $\text{CHCH}_2\text{OC}(\text{CH}_3)_3$ ), 4.49–4.33 (m, 4H,  $\text{C}_{12}\text{H}_8\text{CHCH}_2\text{OCONH}$  and  $\text{CHCH}_3$  and  $\text{CHCH}(\text{CH}_3)_2$ ), 4.20 (t,  $J = 7.4$  Hz, 1H,  $\text{C}_{12}\text{H}_8\text{CHCH}_2\text{OCONH}$ ), 3.73 (dd,  $J = 2.5$  Hz, and 8.7 Hz, 1H,  $\text{CHCH}_2\text{OC}(\text{CH}_3)_3$ ), 3.47 (dd,  $J = 2.5$  Hz, and 6.4 Hz, 1H,  $\text{CHCH}_2\text{OC}(\text{CH}_3)_3$ ), 2.17–2.09 (m, 1H,  $\text{CHCH}(\text{CH}_3)_2$ ), 1.44 (s, 9H,  $\text{CO}_2\text{C}(\text{CH}_3)_3$ ), 1.38 (d,  $J = 6.8$  Hz, 3H,  $\text{CHCH}_3$ ), 1.10 (s, 9H,  $\text{CHCH}_2\text{OC}(\text{CH}_3)_3$ ), 0.97 (d,  $J = 6.9$  Hz, 3H,  $\text{CHCH}(\text{CH}_3)_2$ ), 0.94 (d,  $J = 6.9$  Hz, 3H,  $\text{CHCH}(\text{CH}_3)_2$ ).  $^{13}\text{C NMR}$  (100 MHz,  $\text{CDCl}_3$ )  $\delta$  172.4, 170.4, 169.1, 155.9, 143.8(2C), 141.2(2C), 127.6(2C), 127.0(2C), 125.1(2C), 119.8(2C), 81.8, 73.0, 67.0, 62.1, 58.1, 53.1, 50.4, 47.0, 31.6, 27.9(3C), 27.2(3C), 19.0(2C), 17.9. IR (thin film,  $\text{cm}^{-1}$ ) 3289, 3067, 2973, 2935, 1706, 1641, 1526, 1449, 1392, 1366, 1249, 1231, 1194, 1152, 1079, 1047, 756. HRMS (ESI) calculated for  $\text{C}_{34}\text{H}_{47}\text{N}_3\text{O}_7\text{Na}$   $[\text{M}+\text{Na}]^+$   $m/z$  632.3312, found 632.3308.

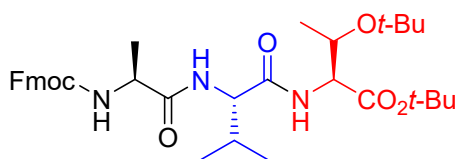

**Fmoc-L-Ala-L-Val-L-Thr(*t*-Bu)-*Ot*-Bu (5ah)** was prepared following **General Procedure 1** using H-L-Val-OH (29.3 mg, 0.250 mmol) and trimethylaluminum 2M in hexane (250  $\mu\text{L}$ , 0.500 mmol), the resulting mixture was stirred in DCM under  $\text{N}_2$  atmosphere at 0 °C. After 1 h, L-Thr(*t*-Bu)-*Ot*-Bu (116 mg, 0.500 mmol) was added. The mixture was stirred under  $\text{N}_2$  atmosphere at ambient temperature. After 24 h, Fmoc-L-Ala-Cl (247 mg, 0.750 mmol) and pivalic acid (2.55 mg, 0.025 mmol) were added into the reaction solution and stirring under  $\text{N}_2$  atmosphere at room temperature for 24 h. The reaction mixture was purified by flash column chromatography (40% AcOEt in hexane) to provide the title compound as a white solid in 92% yield with >20:1 dr (143.4 mg).

$R_f = 0.59$  (50% AcOEt in hexane). M.p. 110–115 °C.  $[\alpha]_D^{20} = -89.0$  ( $c$  1.01,  $\text{CHCl}_3$ ).  $^1\text{H NMR}$  (400 MHz,  $\text{CDCl}_3$ )  $\delta$  7.73 (d,  $J = 7.6$  Hz, 2H,  $\text{C}_{12}\text{H}_8\text{CHCH}_2\text{OCONH}$ ), 7.59–7.57 (m, 2H,  $\text{C}_{12}\text{H}_8\text{CHCH}_2\text{OCONH}$ ), 7.37 (t,  $J = 7.1$  Hz, 2H,  $\text{C}_{12}\text{H}_8\text{CHCH}_2\text{OCONH}$ ), 7.30–7.26 (m, 2H,  $\text{C}_{12}\text{H}_8\text{CHCH}_2\text{OCONH}$ ), 7.08 (br d,  $J = 8.7$  Hz, 1H,  $\text{NH}$ ), 6.59 (br d,  $J = 8.9$  Hz, 1H,  $\text{NH}$ ), 5.85 (d,  $J = 7.6$  Hz, 1H,  $\text{NH}$ ), 4.47–4.32 (m, 5H,  $\text{CHCH}(\text{CH}_3)\text{OC}(\text{CH}_3)_3$  and  $\text{C}_{12}\text{H}_8\text{CHCH}_2\text{OCONH}$  and  $\text{CHCH}_3$  and  $\text{CHCH}(\text{CH}_3)_2$ ), 4.22–4.17 (m, 2H,  $\text{C}_{12}\text{H}_8\text{CHCH}_2\text{OCONH}$  and  $\text{CHCH}(\text{CH}_3)\text{OC}(\text{CH}_3)_3$ ), 2.18–2.10 (m, 1H,  $\text{CHCH}(\text{CH}_3)_2$ ), 1.44 (s, 9H,  $\text{CO}_2\text{C}(\text{CH}_3)_3$ ), 1.38 (d,  $J = 6.9$  Hz, 3H,  $\text{CHCH}_3$ ), 1.14



(s, 9H, CHCH(CH<sub>3</sub>)OC(CH<sub>3</sub>)<sub>3</sub>), 1.14–1.10 (m, 3H, CHCH(CH<sub>3</sub>)OC(CH<sub>3</sub>)<sub>3</sub>), 0.99 (d, *J* = 6.9 Hz, 3H, CHCH(CH<sub>3</sub>)<sub>2</sub>), 0.96 (d, *J* = 6.9 Hz, 3H, CHCH(CH<sub>3</sub>)<sub>2</sub>). <sup>13</sup>C NMR (100 MHz, CDCl<sub>3</sub>) δ 172.3, 170.9, 169.4, 155.8, 143.8, 143.7, 141.2(2C), 127.5(2C), 126.9(2C), 125.1(2C), 119.8(2C), 81.8, 73.7, 67.1, 67.0, 58.3, 58.2, 50.3, 47.0, 31.5, 28.6(3C), 28.0(3C), 20.7, 19.0(2C), 18.0. IR (thin film, cm<sup>-1</sup>) 3291, 3065, 2971, 2935, 1705, 1644, 1535, 1475, 1451, 1391, 1313, 1221, 1143, 1110, 1078, 1045, 757. HRMS (ESI) calculated for C<sub>35</sub>H<sub>49</sub>N<sub>3</sub>O<sub>7</sub>Na [M+Na]<sup>+</sup> *m/z* 646.3468, found 646.3464.

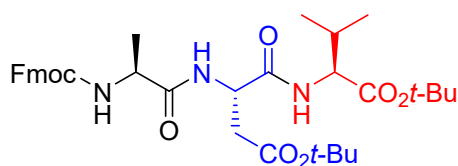

**Fmoc-L-Ala-L-Asp(*t*-Bu)-L-Val-O*t*-Bu (5ai)** was prepared following **General Procedure 1** using H-L-Asp(*t*-Bu)-OH (47.3 mg, 0.250 mmol) and trimethylaluminum 2M in hexane (250 μL, 0.500 mmol), the resulting mixture was stirred in DCM under N<sub>2</sub> atmosphere at 0 °C. After 1 h, L-Val-O*t*-Bu (86.6 mg, 0.500 mmol) was added. The mixture was stirred under N<sub>2</sub> atmosphere at ambient temperature. After 24 h, Fmoc-L-Ala-Cl (247 mg, 0.750 mmol) and pivalic acid (2.55 mg, 0.025 mmol) were added into the reaction solution and stirring under N<sub>2</sub> atmosphere at room temperature for 24 h. The reaction mixture was purified by flash column chromatography (45% AcOEt in hexane) to provide the title compound as a white solid in 87% yield with >20:1 dr (139 mg).

*R*<sub>f</sub> = 0.52 (50% AcOEt in hexane). M.p. 105–110 °C. [α]<sub>D</sub><sup>20</sup> = –78.9 (*c* 1.01, CHCl<sub>3</sub>). <sup>1</sup>H NMR (400 MHz, CDCl<sub>3</sub>) δ 7.74 (d, *J* = 7.6 Hz, 2H, C<sub>12</sub>H<sub>8</sub>CHCH<sub>2</sub>OCONH), 7.59 (t, *J* = 6.8 Hz, 2H, C<sub>12</sub>H<sub>8</sub>CHCH<sub>2</sub>OCONH), 7.43–7.36 (m, 3H, C<sub>12</sub>H<sub>8</sub>CHCH<sub>2</sub>OCONH and NH), 7.32–7.28 (m, 2H, C<sub>12</sub>H<sub>8</sub>CHCH<sub>2</sub>OCONH), 7.12 (br d, *J* = 8.7 Hz, 1H, NH), 5.58 (d, *J* = 7.1 Hz, 1H, NH), 4.83–4.79 (m, 1H, CHCH<sub>2</sub>CO<sub>2</sub>C(CH<sub>3</sub>)<sub>3</sub>), 4.42–4.29 (m, 4H, C<sub>12</sub>H<sub>8</sub>CHCH<sub>2</sub>OCONH and CHCH(CH<sub>3</sub>)<sub>2</sub> and CHCH<sub>3</sub>), 4.21 (t, *J* = 7.1 Hz, 1H, C<sub>12</sub>H<sub>8</sub>CHCH<sub>2</sub>OCONH), 2.90 (dd, *J* = 3.4 Hz and 17 Hz, 1H, CHCH<sub>2</sub>CO<sub>2</sub>C(CH<sub>3</sub>)<sub>3</sub>), 2.60 (dd, *J* = 7.1 Hz and 17 Hz, 1H, CHCH<sub>2</sub>CO<sub>2</sub>C(CH<sub>3</sub>)<sub>3</sub>), 1.44–1.41 (m, 21H, CHCH<sub>2</sub>CO<sub>2</sub>C(CH<sub>3</sub>)<sub>3</sub> and CO<sub>2</sub>C(CH<sub>3</sub>)<sub>3</sub> and CHCH<sub>3</sub>), 0.90 (d, *J* = 7.1 Hz, 3H, CHCH(CH<sub>3</sub>)<sub>2</sub>), 0.88 (d, *J* = 7.1 Hz, 3H, CHCH(CH<sub>3</sub>)<sub>2</sub>). <sup>13</sup>C NMR (100 MHz, CDCl<sub>3</sub>) δ 172.1, 171.4, 170.1, 170.0, 155.8, 143.8, 143.7, 141.2(2C), 127.6(2C), 127.0(2C), 125.0(2C), 119.9(2C), 81.8, 81.7, 67.0, 57.8, 50.6, 49.2, 47.0, 36.8, 30.9, 27.9(3C), 27.8(3C), 18.8(2C), 17.4. IR (thin film, cm<sup>-1</sup>) 3295, 2977, 2931, 1735, 1703, 1677, 1635, 1515, 1451, 1391, 1335, 1311, 1252, 1217, 1149, 1113, 1045, 756. HRMS (ESI) calculated for C<sub>35</sub>H<sub>47</sub>N<sub>3</sub>O<sub>8</sub>Na [M+Na]<sup>+</sup> *m/z* 660.3229, found 660.3255.

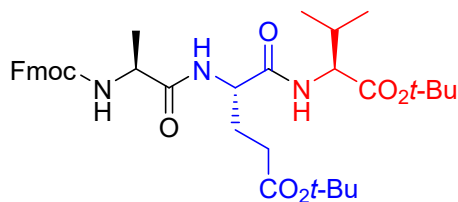

**Fmoc-L-Ala-L-Glu(*t*-Bu)-L-Val-O*t*-Bu (5aj)** was prepared following **General Procedure 1** using H-L-Glu(*t*-Bu)-OH (50.8 mg, 0.250 mmol) and trimethylaluminum 2M in hexane (250  $\mu$ L, 0.500 mmol), the resulting mixture was stirred in DCM under N<sub>2</sub> atmosphere at 0 °C. After 1 h, L-Val-O*t*-Bu (86.6 mg, 0.500 mmol) was added. The mixture was stirred under N<sub>2</sub> atmosphere at ambient temperature. After 24 h, Fmoc-L-Ala-Cl (247 mg, 0.750 mmol) and pivalic acid (2.55 mg, 0.025 mmol) were added into the reaction solution and stirring under N<sub>2</sub> atmosphere at room temperature for 24 h. The reaction mixture was purified by flash column chromatography (45% AcOEt in hexane) to provide the title compound as a white solid in 85% yield with >20:1 dr (138 mg).

R<sub>f</sub> = 0.50 (50% AcOEt in hexane). M.p. 120–125 °C. [ $\alpha$ ]<sub>D</sub><sup>24</sup> = –116.5 (*c* 1.03, CHCl<sub>3</sub>). <sup>1</sup>H NMR (400 MHz, CDCl<sub>3</sub>)  $\delta$  7.74 (d, *J* = 7.6 Hz, 2H, C<sub>12</sub>H<sub>8</sub>CHCH<sub>2</sub>OCONH), 7.59 (d, *J* = 7.1 Hz, 2H, C<sub>12</sub>H<sub>8</sub>CHCH<sub>2</sub>OCONH), 7.38 (t, *J* = 7.6 Hz, 2H, C<sub>12</sub>H<sub>8</sub>CHCH<sub>2</sub>OCONH), 7.31–7.26 (m, 3H, C<sub>12</sub>H<sub>8</sub>CHCH<sub>2</sub>OCONH and NH), 7.13 (br d, *J* = 8.7 Hz, NH), 5.77 (d, *J* = 7.3 Hz, 1H, NH), 4.57 (quin., *J* = 6.4 Hz, 1H, CHCH<sub>3</sub>), 4.38–4.33 (m, 4H, CHCH(CH<sub>3</sub>)<sub>2</sub> and CHCH<sub>2</sub>CH<sub>2</sub>CO<sub>2</sub>C(CH<sub>3</sub>)<sub>3</sub> and C<sub>12</sub>H<sub>8</sub>CHCH<sub>2</sub>OCONH), 4.21 (t, *J* = 7.1 Hz, 1H, C<sub>12</sub>H<sub>8</sub>CHCH<sub>2</sub>OCONH), 2.49–2.34 (m, 2H, CHCH(CH<sub>3</sub>)<sub>2</sub> and CHCH<sub>2</sub>CH<sub>2</sub>CO<sub>2</sub>C(CH<sub>3</sub>)<sub>3</sub>), 2.19–1.94 (m, 3H, CHCH<sub>2</sub>CH<sub>2</sub>CO<sub>2</sub>C(CH<sub>3</sub>)<sub>3</sub> and CHCH<sub>2</sub>CH<sub>2</sub>CO<sub>2</sub>C(CH<sub>3</sub>)<sub>3</sub>), 1.44 (s, 9H, CO<sub>2</sub>C(CH<sub>3</sub>)<sub>3</sub>), 1.43 (s, 9H, CHCH<sub>2</sub>CH<sub>2</sub>CO<sub>2</sub>C(CH<sub>3</sub>)<sub>3</sub>), 1.44–1.39 (m, 3H, CHCH<sub>3</sub>), 0.90 (d, *J* = 7.1 Hz, 3H, CHCH(CH<sub>3</sub>)<sub>2</sub>), 0.88 (d, *J* = 7.1 Hz, 3H, CHCH(CH<sub>3</sub>)<sub>2</sub>). <sup>13</sup>C NMR (100 MHz, CDCl<sub>3</sub>)  $\delta$  173.1, 172.4, 170.7, 170.4, 155.8, 143.8, 143.7, 141.2(2C), 127.6(2C), 127.0(2C), 125.1(2C), 119.9(2C), 81.8, 81.0, 67.0, 57.8, 52.5, 50.5, 47.0, 31.7, 31.0, 28.0(3C), 27.9(3C), 19.2, 18.9(2C) 17.5. IR (thin film, cm<sup>-1</sup>) 3298, 2975, 2933, 1730, 1705, 1676, 1638, 1518, 1450, 1392, 1335, 1311, 1253, 1217, 1149, 1113, 1045, 756. HRMS (ESI) calculated for C<sub>36</sub>H<sub>49</sub>N<sub>3</sub>O<sub>8</sub>Na [M+Na]<sup>+</sup> *m/z* 674.3417, found 674.3417.

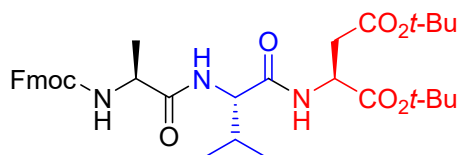

**Fmoc-L-Ala-L-Val-L-Asp(*t*-Bu)-O*t*-Bu (5ak)** was prepared following **General Procedure 1** using H-L-Val-OH (29.3 mg, 0.250 mmol) and trimethylaluminum 2M in hexane (250  $\mu$ L, 0.500 mmol), the resulting mixture was stirred in DCM under N<sub>2</sub> atmosphere at 0 °C. After 1 h, L-Asp(*t*-Bu)-O*t*-Bu (122 mg, 0.500 mmol) was added. The mixture was stirred under N<sub>2</sub> atmosphere at ambient

temperature. After 24 h, Fmoc-L-Ala-Cl (247 mg, 0.750 mmol) and pivalic acid (2.55 mg, 0.025 mmol) were added into the reaction solution and stirring under N<sub>2</sub> atmosphere at room temperature for 24 h. The reaction mixture was purified by flash column chromatography (45% AcOEt in hexane) to provide the title compound as a white solid in 91% yield with >20:1 dr (145 mg).

R<sub>f</sub> = 0.47 (50% AcOEt in hexane). M.p. 210–215 °C. [α]<sub>D</sub><sup>21</sup> = –13.8 (*c* 1.09, CHCl<sub>3</sub>). <sup>1</sup>H NMR (400 MHz, CDCl<sub>3</sub>) δ 7.73 (d, *J* = 7.6 Hz, 2H, C<sub>12</sub>H<sub>8</sub>CHCH<sub>2</sub>OCONH), 7.58 (d, *J* = 6.4 Hz, 2H, C<sub>12</sub>H<sub>8</sub>CHCH<sub>2</sub>OCONH), 7.37 (t, *J* = 7.1 Hz, 2H, C<sub>12</sub>H<sub>8</sub>CHCH<sub>2</sub>OCONH), 7.29–7.25 (m, 2H, C<sub>12</sub>H<sub>8</sub>CHCH<sub>2</sub>OCONH), 7.10–7.05 (m, 2H, NH and NH), 5.84 (d, *J* = 7.8 Hz, 1H, NH), 4.75 (dd, *J* = 3.9 Hz and 8.0 Hz, 1H, CHCH<sub>2</sub>CO<sub>2</sub>C(CH<sub>3</sub>)<sub>3</sub>), 4.48–4.36 (m, 4H, C<sub>12</sub>H<sub>8</sub>CHCH<sub>2</sub>OCONH and CHCH(CH<sub>3</sub>)<sub>2</sub> and CHCH<sub>3</sub>), 4.19 (t, *J* = 7.1 Hz, 1H, C<sub>12</sub>H<sub>8</sub>CHCH<sub>2</sub>OCONH), 2.84 (dd, *J* = 4.6 Hz and 17 Hz, 1H, CHCH<sub>2</sub>CO<sub>2</sub>C(CH<sub>3</sub>)<sub>3</sub>), 2.63 (dd, *J* = 3.9 Hz and 17 Hz, 1H, CHCH<sub>2</sub>CO<sub>2</sub>C(CH<sub>3</sub>)<sub>3</sub>), 2.18–2.08 (m, 1H, CHCH(CH<sub>3</sub>)<sub>2</sub>), 1.42 (s, 9H, CO<sub>2</sub>C(CH<sub>3</sub>)<sub>3</sub>), 1.41 (s, 9H, CHCH<sub>2</sub>CO<sub>2</sub>C(CH<sub>3</sub>)<sub>3</sub>), 1.38 (d, *J* = 7.3 Hz, 3H, CHCH<sub>3</sub>), 0.97 (d, *J* = 6.9 Hz, 3H, CHCH(CH<sub>3</sub>)<sub>2</sub>), 0.94 (d, *J* = 6.9 Hz, 3H, CHCH(CH<sub>3</sub>)<sub>2</sub>). <sup>13</sup>C NMR (100 MHz, CDCl<sub>3</sub>) δ 172.4, 170.4, 170.2, 169.4, 155.9, 143.8, 143.7, 141.2(2C), 127.6(2C), 126.9(2C), 125.1(2C), 119.8(2C), 82.2, 81.5, 67.0, 58.1, 50.4, 48.9, 47.0, 37.3, 31.6, 27.9(3C), 27.8(3C), 19.0, 18.9, 17.9. IR (thin film, cm<sup>-1</sup>) 3293, 3017, 2977, 1725, 1644, 1510, 1450, 1393, 1368, 1214, 1150, 1077, 1048, 746. HRMS (ESI) calculated for C<sub>35</sub>H<sub>47</sub>N<sub>3</sub>O<sub>8</sub>Na [M+Na]<sup>+</sup> *m/z* 660.3229, found 660.3260.

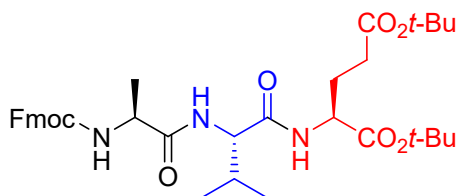

**Fmoc-L-Ala-L-Val-L-Glu(*t*-Bu)-O*t*-Bu (5a1)** was prepared following **General Procedure 1** using H-L-Val-OH (29.3 mg, 0.250 mmol) and trimethylaluminum 2M in hexane (250 μL, 0.500 mmol), the resulting mixture was stirred in DCM under N<sub>2</sub> atmosphere at 0 °C. After 1 h, L-Glu(*t*-Bu)-O*t*-Bu (130 mg, 0.500 mmol) was added. The mixture was stirred under N<sub>2</sub> atmosphere at ambient temperature. After 24 h, Fmoc-L-Ala-Cl (247 mg, 0.750 mmol) and pivalic acid (2.55 mg, 0.025 mmol) were added into the reaction solution and stirring under N<sub>2</sub> atmosphere at room temperature for 24 h. The reaction mixture was purified by flash column chromatography (45% AcOEt in hexane) to provide the title compound as a white solid in 89% yield with >20:1 dr (145 mg).

R<sub>f</sub> = 0.47 (50% AcOEt in hexane). M.p. 145–150 °C. [α]<sub>D</sub><sup>21</sup> = –67.7 (*c* 1.02, CHCl<sub>3</sub>). <sup>1</sup>H NMR (400 MHz, CDCl<sub>3</sub>) δ 7.72 (d, *J* = 7.6 Hz, 2H, C<sub>12</sub>H<sub>8</sub>CHCH<sub>2</sub>OCONH), 7.57 (d, *J* = 7.6 Hz, 2H, C<sub>12</sub>H<sub>8</sub>CHCH<sub>2</sub>OCONH), 7.36 (t, *J* = 7.6 Hz, 2H, C<sub>12</sub>H<sub>8</sub>CHCH<sub>2</sub>OCONH), 7.28–7.22 (m, 3H, C<sub>12</sub>H<sub>8</sub>CHCH<sub>2</sub>OCONH and NH), 7.13 (br d, *J* = 8.5 Hz, NH), 6.07 (d, *J* = 7.8 Hz, 1H, NH), 4.49–

4.34 (m, 5H,  $\underline{CH}CH(CH_3)_2$  and  $\underline{CH}CH_3$  and  $\underline{CH}CH_2CH_2CO_2C(CH_3)_3$  and  $C_{12}H_8CHCH_2OCONH$ ), 4.19 (t,  $J = 7.3$  Hz, 1H,  $C_{12}H_8\underline{CH}CH_2OCONH$ ), 2.33–2.07 (m, 4H,  $CHCH(CH_3)_2$  and  $CHCH_2CH_2CO_2C(CH_3)_3$  and  $CHCH_2CH_2CO_2C(CH_3)_3$ ), 1.93–1.84 (m, 1H,  $CHCH_2CH_2CO_2C(CH_3)_3$ ), 1.42 (s, 9H,  $CO_2C(CH_3)_3$ ), 1.40 (s, 9H,  $CHCH_2CH_2CO_2C(CH_3)_3$ ), 1.38 (d,  $J = 7.3$  Hz, 3H,  $CHCH_3$ ), 0.95 (d,  $J = 6.9$  Hz, 3H,  $CHCH(CH_3)_2$ ), 0.94 (d,  $J = 6.9$  Hz, 3H,  $CHCH(CH_3)_2$ ).  $^{13}C$  NMR (100 MHz,  $CDCl_3$ )  $\delta$  172.7, 172.0, 170.9, 170.7, 156.0, 143.9, 143.7, 141.2(2C), 127.5(2C), 126.9 (2C), 125.1 (2C), 119.8 (2C), 82.0, 80.6, 67.0, 58.3, 52.2, 50.3, 46.9, 31.3, 31.2, 27.9(3C), 27.8(3C), 27.4, 19.0(2C) 18.3. IR (thin film,  $cm^{-1}$ ) 3286, 3067, 2975, 2933, 1729, 1703, 1643, 1531, 1450, 1392, 1367, 1252, 1228, 1150, 1112, 1078, 1041, 846, 756. HRMS (ESI) calculated for  $C_{36}H_{49}N_3O_8Na$   $[M+Na]^+$   $m/z$  674.3417, found 674.3411.

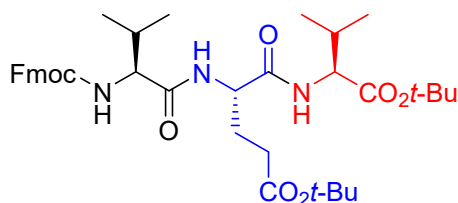

**Fmoc-L-Val-L-Glu(*t*-Bu)-L-Val-O*t*-Bu (5am)** was prepared following **General Procedure 1** using H-L-Glu(*t*-Bu)-OH (50.8 mg, 0.250 mmol) and trimethylaluminum 2M in hexane (250  $\mu$ L, 0.500 mmol), the resulting mixture was stirred in DCM under  $N_2$  atmosphere at 0  $^\circ$ C. After 1 h, L-Val-O*t*-Bu (86.6 mg, 0.500 mmol) was added. The mixture was stirred under  $N_2$  atmosphere at ambient temperature. After 24 h, Fmoc-L-Val-Cl (268 mg, 0.750 mmol) and pivalic acid (2.55 mg, 0.025 mmol) were added into the reaction solution and stirring under  $N_2$  atmosphere at room temperature for 24 h. The reaction mixture was purified by flash column chromatography (33% AcOEt in hexane) to provide the title compound as a white solid in 86% yield with >20:1 dr (146 mg).

$R_f = 0.34$  (33% AcOEt in hexane). M.p. 175–180  $^\circ$ C.  $[\alpha]_D^{24} = -117.1$  ( $c$  1.01,  $CHCl_3$ ).  $^1H$  NMR (400 MHz,  $CDCl_3$ )  $\delta$  7.74 (d,  $J = 7.3$  Hz, 2H,  $C_{12}H_8\underline{CH}CH_2OCONH$ ), 7.62–7.59 (m, 2H,  $C_{12}H_8\underline{CH}CH_2OCONH$ ), 7.38 (t,  $J = 7.6$  Hz, 2H,  $C_{12}H_8\underline{CH}CH_2OCONH$ ), 7.31–7.26 (m, 3H,  $C_{12}H_8\underline{CH}CH_2OCONH$  and  $\underline{NH}$ ), 7.14 (br d,  $J = 8.0$  Hz,  $\underline{NH}$ ), 5.84 (br d,  $J = 8.5$  Hz, 1H,  $\underline{NH}$ ), 4.64–4.60 (m, 1H,  $\underline{CH}CH(CH_3)_2$ ), 4.45–4.30 (m, 3H,  $\underline{CH}CH_2CH_2CO_2C(CH_3)_3$  and  $C_{12}H_8CHCH_2OCONH$ ), 4.23–4.16 (m, 2H,  $C_{12}H_8\underline{CH}CH_2OCONH$  and  $\underline{CH}CH(CH_3)_2$ ), 2.49–2.34 (m, 2H,  $CHCH(CH_3)_2$  and  $CHCH(CH_3)_2$ ), 2.21–1.94 (m, 4H,  $CHCH_2CH_2CO_2C(CH_3)_3$  and  $CHCH_2CH_2CO_2C(CH_3)_3$ ), 1.44 (s, 9H,  $CO_2C(CH_3)_3$ ), 1.42 (s, 9H,  $CHCH_2CH_2CO_2C(CH_3)_3$ ), 0.94–0.87 (m, 12H,  $CHCH(CH_3)_2$  and  $CHCH(CH_3)_2$ ).  $^{13}C$  NMR (100 MHz,  $CDCl_3$ )  $\delta$  173.0, 171.4, 170.9, 170.5, 156.3, 143.9, 143.8, 141.2 (2C), 127.6 (2C), 127.0 (2C), 125.2, 125.1, 119.8 (2C), 81.7, 80.9, 67.0, 60.1, 57.8, 52.4, 47.1, 31.7, 31.0, 28.1 (3C), 28.0 (3C), 19.1, 18.9 (2C), 17.9, 17.5 (2C). IR (thin film,  $cm^{-1}$ ) 3305, 2975, 2930, 1715, 1705, 1675, 1641, 1517, 1441, 1393, 1331, 1311,

1251, 1217, 1149, 1110, 1045, 756. HRMS (ESI) calculated for  $C_{38}H_{53}N_3O_8Na$   $[M+Na]^+$   $m/z$  702.3730, found 702.3723.

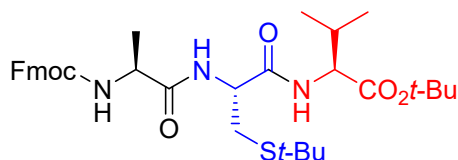

**Fmoc-L-Ala-L-Cys(*t*-Bu)-L-Val-O*t*-Bu (5an)** was prepared following **General Procedure 1** using H-L-Cys(*t*-Bu)-OH (53.4 mg, 0.250 mmol) and trimethylaluminum 2M in hexane (250  $\mu$ L, 0.500 mmol), the resulting mixture was stirred in DCM under  $N_2$  atmosphere at 0  $^\circ$ C. After 1 h, L-Val-O*t*-Bu (86.6 mg, 0.500 mmol) was added. The mixture was stirred under  $N_2$  atmosphere at ambient temperature. After 24 h, Fmoc-L-Ala-Cl (247 mg, 0.750 mmol) and pivalic acid (2.55 mg, 0.025 mmol) were added into the reaction solution and stirring under  $N_2$  atmosphere at room temperature for 24 h. The reaction mixture was purified by flash column chromatography (40% AcOEt in hexane) to provide the title compound as a white solid in 89% yield with >20:1 dr (139 mg).

$R_f$  = 0.56 (50% AcOEt in hexane). M.p. 130–135  $^\circ$ C.  $[\alpha]_D^{20}$  =  $-78.9$  ( $c$  1.01,  $CHCl_3$ ).  $^1H$  NMR (400 MHz,  $CDCl_3$ )  $\delta$  7.75 (d,  $J$  = 7.6 Hz, 2H,  $C_{12}H_8CHCH_2OCONH$ ), 7.58 (d,  $J$  = 7.6 Hz, 2H,  $C_{12}H_8CHCH_2OCONH$ ), 7.39 (t,  $J$  = 7.4 Hz, 2H,  $C_{12}H_8CHCH_2OCONH$ ), 7.32–7.28 (m, 2H,  $C_{12}H_8CHCH_2OCONH$ ), 7.06–7.03 (m, 2H,  $NH$ ), 5.58 (d,  $J$  = 6.9 Hz, 1H,  $NH$ ), 4.58 (quin.,  $J$  = 6.6 Hz, 1H,  $CHCH_3$ ), 4.39–4.33 (m, 4H,  $CHCH_2S(CH_3)_3$  and  $CHCH(CH_3)_2$  and  $C_{12}H_8CHCH_2OCONH$ ), 4.22 (t,  $J$  = 7.1 Hz, 1H,  $C_{12}H_8CHCH_2OCONH$ ), 3.04 (dd,  $J$  = 5.3 Hz and 13.0 Hz, 1H,  $CHCH_2S(CH_3)_3$ ), 2.81 (dd,  $J$  = 7.3 Hz and 13.0 Hz, 1H,  $CHCH_2S(CH_3)_3$ ), 2.16–2.12 (m, 1H,  $CHCH(CH_3)_2$ ), 1.46 (s, 9H,  $CO_2C(CH_3)_3$ ), 1.42 (d,  $J$  = 6.6 Hz, 3H,  $CHCH_3$ ), 1.32 (s, 9H,  $CHCH_2S(CH_3)_3$ ), 0.92 (d,  $J$  = 5.5 Hz, 3H,  $CHCH(CH_3)_2$ ), 0.90 (d,  $J$  = 5.5 Hz, 3H,  $CHCH(CH_3)_2$ ).  $^{13}C$  NMR (100 MHz,  $CDCl_3$ )  $\delta$  172.3, 170.2, 169.8, 155.8, 143.8, 143.7, 141.2(2C), 127.6(2C), 127.0(2C), 125.0(2C), 119.8(2C), 81.8, 67.1, 57.9, 53.1, 50.5, 47.0, 43.0, 31.2, 30.8(3C), 30.3, 27.9(3C), 19.0, 18.8, 17.7. IR (thin film,  $cm^{-1}$ ) 3301, 3061, 2971, 1723, 1691, 1639, 1525, 1441, 1391, 1366, 1253, 1221, 1151, 1107, 1077, 1043, 756. HRMS (ESI) calculated for  $C_{34}H_{47}N_3O_6SNa$   $[M+Na]^+$   $m/z$  648.3083, found 648.3066.

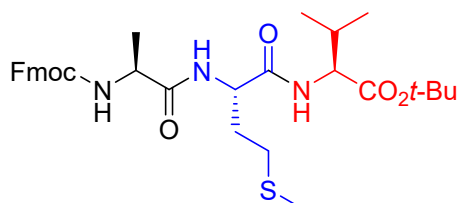

**Fmoc-L-Ala-L-Met-L-Val-O*t*-Bu (5ao)** was prepared following **General Procedure 1** using H-L-

Met-OH (37.3 mg, 0.250 mmol) and trimethylaluminum 2M in hexane (250  $\mu$ L, 0.500 mmol), the resulting mixture was stirred in DCM under N<sub>2</sub> atmosphere at 0 °C. After 1 h, L-Val-*O*-*t*-Bu (86.6 mg, 0.500 mmol) was added. The mixture was stirred under N<sub>2</sub> atmosphere at ambient temperature. After 24 h, Fmoc-L-Ala-Cl (247 mg, 0.750 mmol) and pivalic acid (2.55 mg, 0.025 mmol) were added into the reaction solution and stirring under N<sub>2</sub> atmosphere at room temperature for 24 h. The reaction mixture was purified by flash column chromatography (40% AcOEt in hexane) to provide the title compound as a white solid in 91% yield with >20:1 dr (136 mg).

R<sub>f</sub> = 0.56 (50% AcOEt in hexane). M.p. 180–185 °C.  $[\alpha]_{\text{D}}^{20} = -75.5$  (*c* 1.01, CHCl<sub>3</sub>). <sup>1</sup>H NMR (400 MHz, CDCl<sub>3</sub>)  $\delta$  7.73 (d, *J* = 7.6 Hz, 2H, C<sub>12</sub>H<sub>8</sub>CHCH<sub>2</sub>OCONH), 7.58 (d, *J* = 7.3 Hz, 2H, C<sub>12</sub>H<sub>8</sub>CHCH<sub>2</sub>OCONH), 7.38–7.35 (m, 3H, C<sub>12</sub>H<sub>8</sub>CHCH<sub>2</sub>OCONH and NH), 7.29–7.26 (m, 2H, C<sub>12</sub>H<sub>8</sub>CHCH<sub>2</sub>OCONH), 7.20 (br d, *J* = 8.7 Hz, NH), 6.03 (d, *J* = 7.8 Hz, 1H, NH), 4.82 (quin., *J* = 7.4 Hz, 1H, CHCH<sub>3</sub>), 4.47–4.31 (m, 4H, CHCH<sub>2</sub>CH<sub>2</sub>SCH<sub>3</sub> and CHCH(CH<sub>3</sub>)<sub>2</sub> and C<sub>12</sub>H<sub>8</sub>CHCH<sub>2</sub>OCONH), 4.20 (t, *J* = 7.1 Hz, 1H, C<sub>12</sub>H<sub>8</sub>CHCH<sub>2</sub>OCONH), 2.56 (t, *J* = 7.3 Hz, 2H, CHCH<sub>2</sub>CH<sub>2</sub>SCH<sub>3</sub>), 2.17–1.96 (m, 3H, CHCH<sub>2</sub>CH<sub>2</sub>SCH<sub>3</sub> and CHCH(CH<sub>3</sub>)<sub>2</sub>), 2.04 (s, 3H, CHCH<sub>2</sub>CH<sub>2</sub>SCH<sub>3</sub>), 1.43 (s, 9H, CO<sub>2</sub>C(CH<sub>3</sub>)<sub>3</sub>), 1.37 (d, *J* = 6.9 Hz, 3H, CHCH<sub>3</sub>), 0.89 (d, *J* = 6.9 Hz, 3H, CHCH(CH<sub>3</sub>)<sub>2</sub>), 0.86 (d, *J* = 6.9 Hz, 3H, CHCH(CH<sub>3</sub>)<sub>2</sub>). <sup>13</sup>C NMR (100 MHz, CDCl<sub>3</sub>)  $\delta$  172.6, 170.8, 170.5, 156.0, 143.8, 143.7, 141.1(2C), 127.6(2C), 127.0(2C), 125.1(2C), 119.8(2C), 81.8, 67.1, 57.6, 52.1, 50.3, 47.0, 31.6, 31.1, 29.8, 27.9(3C), 19.1, 18.8, 17.6, 14.9. IR (thin film, cm<sup>-1</sup>) 3289, 3056, 2973, 1725, 1691, 1631, 1525, 1449, 1391, 1365, 1252, 1221, 1151, 1105, 1078, 1043, 756. HRMS (ESI) calculated for C<sub>32</sub>H<sub>43</sub>N<sub>3</sub>O<sub>6</sub>SNa [M+Na]<sup>+</sup> *m/z* 620.2770, found 620.2765.

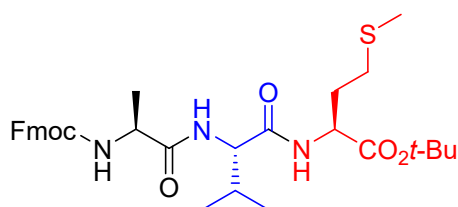

**Fmoc-L-Ala-L-Val-L-Met-Ot-Bu (5ap)** was prepared following **General Procedure 1** using H-L-Val-OH (29.3 mg, 0.250 mmol) and trimethylaluminum 2M in hexane (250  $\mu$ L, 0.500 mmol), the resulting mixture was stirred in DCM under N<sub>2</sub> atmosphere at 0 °C. After 1 h, L-Met-*O*-*t*-Bu (103 mg, 0.500 mmol) was added. The mixture was stirred under N<sub>2</sub> atmosphere at ambient temperature. After 24 h, Fmoc-L-Ala-Cl (247 mg, 0.750 mmol) and pivalic acid (2.55 mg, 0.025 mmol) were added into the reaction solution and stirring under N<sub>2</sub> atmosphere at room temperature for 24 h. The reaction mixture was purified by flash column chromatography (45% AcOEt in hexane) to provide the title compound as a white solid in 90% yield with >20:1 dr (134 mg).

R<sub>f</sub> = 0.41 (50% AcOEt in hexane). M.p. 150–155 °C.  $[\alpha]_{\text{D}}^{20} = -46.2$  (*c* 1.17, CHCl<sub>3</sub>). <sup>1</sup>H NMR (400 MHz, CDCl<sub>3</sub>)  $\delta$  7.71 (d, *J* = 7.6 Hz, 2H, C<sub>12</sub>H<sub>8</sub>CHCH<sub>2</sub>OCONH), 7.57 (d, *J* = 7.3 Hz, 2H,

$C_{12}H_{18}CHCH_2OCONH$ ), 7.49 (br d,  $J = 7.8$  Hz, 1H,  $NH$ ), 7.44 (br d,  $J = 8.9$  Hz, 1H,  $NH$ ), 7.34 (t,  $J = 7.3$  Hz, 2H,  $C_{12}H_{18}CHCH_2OCONH$ ), 7.26–7.22 (m, 2H,  $C_{12}H_{18}CHCH_2OCONH$ ), 6.36 (d,  $J = 8.2$  Hz, 1H,  $NH$ ), 4.66–4.51 (m, 3H,  $CHCH_2CH_2SCH_3$  and  $CHCH_3$  and  $CHCH(CH_3)_2$ ), 4.36–4.29 (m, 2H,  $C_{12}H_{18}CHCH_2OCONH$ ), 4.17 (t,  $J = 7.4$  Hz, 1H,  $C_{12}H_{18}CHCH_2OCONH$ ), 2.53–2.38 (m, 2H,  $CHCH_2CH_2SCH_3$ ), 2.15–2.02 (m, 1H,  $CHCH(CH_3)_2$ ), 1.98 (s, 3H,  $CHCH_2CH_2SCH_3$ ), 1.95–1.86 (m, 2H,  $CHCH_2CH_2SCH_3$ ), 1.40 (s, 9H,  $CO_2C(CH_3)_3$ ), 1.38 (d,  $J = 7.1$  Hz, 3H,  $CHCH_3$ ), 0.96 (d,  $J = 6.9$  Hz, 3H,  $CHCH(CH_3)_2$ ), 0.94 (d,  $J = 6.9$  Hz, 3H,  $CHCH(CH_3)_2$ ).  $^{13}C$  NMR (100 MHz,  $CDCl_3$ )  $\delta$  172.8, 171.0, 170.7, 156.1, 143.8, 143.7, 141.2(2C), 127.5(2C), 126.9(2C), 125.1(2C), 119.8(2C), 82.1, 67.1, 58.5, 52.0, 50.3, 46.9, 31.9, 31.3, 29.8, 27.8(3C), 19.0(2C), 18.4, 15.3. IR (thin film,  $cm^{-1}$ ) 3287, 3066, 2971, 1729, 1698, 1639, 1530, 1449, 1392, 1368, 1253, 1229, 1151, 1109, 1078, 1043, 756. HRMS (ESI) calculated for  $C_{32}H_{43}N_3O_6SNa$   $[M+Na]^+$   $m/z$  620.2770, found 620.2774.

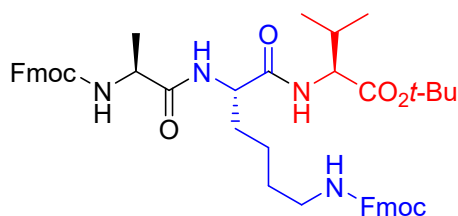

**Fmoc-L-Ala-L-Lys(Fmoc)-L-Val-Ot-Bu (5aq)** was prepared following **General Procedure 1** using H-L-Lys(Fmoc)-OH (92.1 mg, 0.250 mmol) and trimethylaluminum 2M in hexane (250  $\mu$ L, 0.500 mmol), the resulting mixture was stirred in DCM under  $N_2$  atmosphere at 0  $^\circ$ C. After 1 h, L-Val-Ot-Bu (86.6 mg, 0.500 mmol) was added. The mixture was stirred under  $N_2$  atmosphere at ambient temperature. After 24 h, Fmoc-L-Ala-Cl (247 mg, 0.750 mmol) and pivalic acid (2.55 mg, 0.025 mmol) were added into the reaction solution and stirring under  $N_2$  atmosphere at room temperature for 24 h. The reaction mixture was purified by flash column chromatography (40% AcOEt in hexane) to provide the title compound as a white solid in 63% yield with  $>20:1$  dr (129 mg).

$R_f = 0.38$  (50% AcOEt in hexane). M.p. 205–210  $^\circ$ C.  $[\alpha]_D^{22} = -56.4$  ( $c$  1.01,  $CHCl_3$ ).  $^1H$  NMR (400 MHz, DMSO- $d_6$ )  $\delta$  7.93–7.85 (m, 6H,  $NH$  and  $C_{12}H_{18}CHCH_2OCONH$  and  $C_{12}H_{18}CHCH_2OCONH$ ), 7.73–7.55 (m, 5H,  $C_{12}H_{18}CHCH_2OCONH$  and  $C_{12}H_{18}CHCH_2OCONH$  and  $NH$ ), 7.41–7.23 (m, 9H,  $C_{12}H_{18}CHCH_2OCONH$  and  $C_{12}H_{18}CHCH_2OCONH$  and  $NH$ ), 4.40–4.03 (m, 9H,  $CHCH_3$  and  $CHCH_2CH_2CH_2CH_2NHFmoc$  and  $CHCH(CH_3)_2$  and  $C_{12}H_{18}CHCH_2OCONH$  and  $C_{12}H_{18}CHCH_2OCONH$  and  $C_{12}H_{18}CHCH_2OCONH$  and  $C_{12}H_{18}CHCH_2OCONH$ ), 2.98–2.96 (m, 2H,  $CHCH_2CH_2CH_2CH_2NHFmoc$ ), 2.06–1.97 (m, 1H,  $CHCH(CH_3)_2$ ), 1.70–1.69 (m, 1H,  $CHCH_2CH_2CH_2CH_2NHFmoc$ ), 1.58–1.50 (m, 1H,  $CHCH_2CH_2CH_2CH_2NHBoc$ ), 1.38 (s, 9H,  $CO_2C(CH_3)_3$ ), 1.33–1.23 (m, 4H,  $CHCH_2CH_2CH_2CH_2NHFmoc$  and  $CHCH_2CH_2CH_2CH_2NHFmoc$ ), 0.87 (d,  $J = 6.2$  Hz, 3H,  $CHCH(CH_3)_2$ ), 0.85 (d,  $J = 6.2$  Hz, 3H,  $CHCH(CH_3)_2$ ).  $^{13}C$  NMR (100 MHz, DMSO- $d_6$ )  $\delta$  172.4, 171.8, 170.4 (2C), 156.1, 155.7, 143.9 (2C), 143.8, 140.7 (2C), 127.6

(4C), 127.1 (4C), 125.3 (2C), 125.1 (2C), 120.0 (6C), 80.5 (2C), 65.7, 65.2, 57.9, 52.2, 50.1, 46.8, 46.7, 31.9, 30.0, 29.2, 27.6 (3C), 22.5, 18.9, 18.2, 18.0. IR (thin film,  $\text{cm}^{-1}$ ) 3292, 3067, 2973, 2933, 1700, 1642, 1520, 1477, 1450, 1392, 1366, 1312, 1247, 1166, 1078, 1042, 756. HRMS (ESI) calculated for  $\text{C}_{48}\text{H}_{56}\text{N}_4\text{O}_8\text{Na}$   $[\text{M}+\text{Na}]^+$   $m/z$  839.3996, found 839.3991.



## 6. General Procedure for One-Pot Tetrapeptide Synthesis

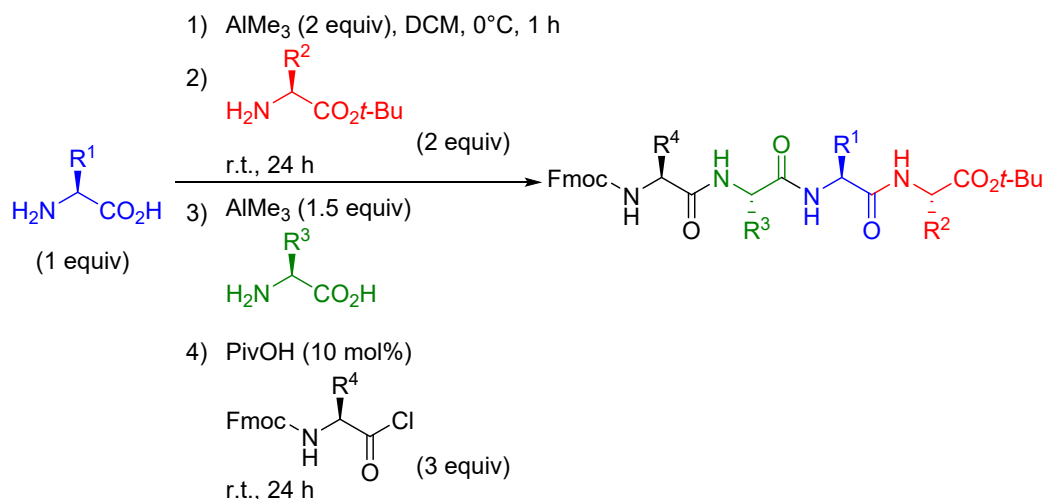

**General procedure 2:** A mixture of L-amino acid (0.250 mmol), trimethylaluminum 2M in hexane (250  $\mu\text{L}$ , 0.500 mmol), and dry DCM (1 mL) in a flame-dried 20 mL test tube equipped with a magnetic stirring bar was stirred vigorously for 1 h at  $0^\circ\text{C}$  under  $\text{N}_2$  atmosphere. Then, L-amino acid *tert*-butyl ester (0.500 mmol) was added to the above reaction solution. The mixture was allowed to stir vigorously under  $\text{N}_2$  atmosphere at room temperature for 24 h. Then, a solution of trimethylaluminum 2M in hexane (188  $\mu\text{L}$ , 0.375 mmol) and L-amino acid (0.250 mmol), which was stirred for 1 h, was added. After 24 h, Fmoc-L-amino acid chloride and pivalic acid (2.55 mg, 0.025 mmol) were added to the reaction solution, and stirring continued under  $\text{N}_2$  atmosphere at room temperature for 24 h. The reaction mixture was then diluted with  $\text{CHCl}_3$  (4.50 mL), transferred onto  $\text{SiO}_2$  column using by a pipette, and the used test tube ~~was~~ and pipette were washed with  $\text{CHCl}_3$  (2 x 4.00 mL). The reaction mixture was purified by flash column chromatography (50–100% EtOAc in hexane) to provide the corresponding tetrapeptide as white solid.

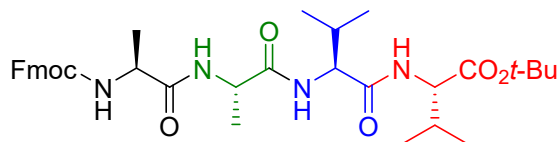

**Fmoc-L-Ala-L-Ala-L-Val-L-Val-Ot-Bu (6a)** was prepared following **General Procedure 2** using H-L-Val-OH (29.3 mg, 0.250 mmol) and trimethylaluminum 2M in hexane (250  $\mu\text{L}$ , 0.500 mmol), the resulting mixture was stirred in DCM under  $\text{N}_2$  atmosphere at  $0^\circ\text{C}$ . After 1 h, L-Val-Ot-Bu (86.6 mg, 0.500 mmol) was added. The mixture was stirred under  $\text{N}_2$  atmosphere at ambient temperature. After

24 h, stirred solution of H-L-Ala-OH (22.3 mg, 0.250 mmol) and trimethylaluminum 2M in hexane (188  $\mu$ L, 0.375 mmol) was added into the reaction solution for further 24 h. Then, Fmoc-L-Ala-Cl (247 mg, 0.750 mmol) and pivalic acid (2.55 mg, 0.025 mmol) were added into the reaction solution and stirring under N<sub>2</sub> atmosphere at room temperature for 24 h. The reaction mixture was purified by flash column chromatography (80% AcOEt in hexane) to provide the title compound as a white solid in 59% yield with >20:1 dr (92.4 mg).

R<sub>f</sub> = 0.35 (80% AcOEt in hexane). M.p. 175–180 °C.  $[\alpha]_D^{22} = -32.9$  (*c* 1.01, CHCl<sub>3</sub>). <sup>1</sup>H NMR (400 MHz, CDCl<sub>3</sub>)  $\delta$  7.74–7.72 (m, 3H, C<sub>12</sub>H<sub>8</sub>CHCH<sub>2</sub>OCONH and NH), 7.58 (d, *J* = 7.6 Hz, 2H, C<sub>12</sub>H<sub>8</sub>CHCH<sub>2</sub>OCONH), 7.41–7.24 (m, 6H, C<sub>12</sub>H<sub>8</sub>CHCH<sub>2</sub>OCONH and NH), 6.10 (br d, *J* = 8.2 Hz, 1H, NH), 4.81–4.78 (m, 1H, CHCH(CH<sub>3</sub>)<sub>2</sub>), 4.63–4.59 (m, 2H, CHCH<sub>3</sub> and CHCH(CH<sub>3</sub>)<sub>2</sub>), 4.49–4.29 (m, 3H, CHCH<sub>3</sub> and C<sub>12</sub>H<sub>8</sub>CHCH<sub>2</sub>OCONH), 4.19 (t, *J* = 7.3 Hz, 1H, C<sub>12</sub>H<sub>8</sub>CHCH<sub>2</sub>OCONH), 2.12–2.02 (m, 2H, CHCH(CH<sub>3</sub>)<sub>2</sub> and CHCH(CH<sub>3</sub>)<sub>2</sub>), 1.39 (s, 9H, CO<sub>2</sub>C(CH<sub>3</sub>)<sub>3</sub>), 1.37–1.34 (m, 6H, CHCH<sub>3</sub> and CHCH<sub>3</sub>), 0.95 (d, *J* = 6.9 Hz, 3H, CHCH(CH<sub>3</sub>)<sub>2</sub>), 0.93 (d, *J* = 6.9 Hz, 3H, CHCH(CH<sub>3</sub>)<sub>2</sub>), 0.85 (d, *J* = 6.9 Hz, 3H, CHCH(CH<sub>3</sub>)<sub>2</sub>), 0.81 (d, *J* = 6.9 Hz, 3H, CHCH(CH<sub>3</sub>)<sub>2</sub>). <sup>13</sup>C NMR (100 MHz, CDCl<sub>3</sub>)  $\delta$  172.4 (2C), 171.2, 170.8, 155.9, 143.9 (2C), 141.2 (2C), 127.6 (2C), 127.0 (2C), 125.2 (2C), 119.9 (2C), 81.8, 67.1, 58.5, 57.6, 48.7, 47.1, 31.4, 31.3, 27.9 (3C), 19.7 (2C), 19.0 (2C), 18.8, 18.4, 17.7. IR (thin film, cm<sup>-1</sup>) 3305, 3044, 2969, 2933, 1729, 1705, 1664, 1631, 1515, 1441, 1391, 1355, 1301, 1241, 1217, 1149, 1108, 1049, 753. HRMS (ESI) calculated for C<sub>35</sub>H<sub>48</sub>N<sub>4</sub>O<sub>7</sub>Na [M+Na]<sup>+</sup> *m/z* 659.3421, found 659.3429.

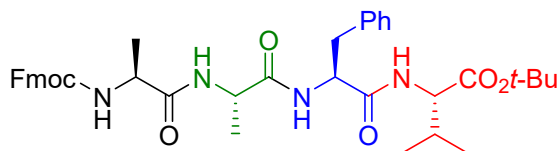

**Fmoc-L-Ala-L-Ala-L-Phe-L-Val-Ot-Bu (6b)** was prepared following **General Procedure 2** using H-L-Phe-OH (41.3 mg, 0.250 mmol) and trimethylaluminum 2M in hexane (250  $\mu$ L, 0.500 mmol), the resulting mixture was stirred in DCM under N<sub>2</sub> atmosphere at 0 °C. After 1 h, L-Val-Ot-Bu (86.6 mg, 0.500 mmol) was added. The mixture was stirred under N<sub>2</sub> atmosphere at ambient temperature. After 24 h, stirred solution of H-L-Ala-OH (22.3 mg, 0.250 mmol) and trimethylaluminum 2M in hexane (188  $\mu$ L, 0.375 mmol) was added into the reaction solution for further 24 h. Then, Fmoc-L-Ala-Cl (247 mg, 0.750 mmol) and pivalic acid (2.55 mg, 0.025 mmol) were added into the reaction solution and stirring under N<sub>2</sub> atmosphere at room temperature for 24 h. The reaction mixture was purified by flash column chromatography (67% AcOEt in hexane) to provide the title compound as a white solid in 54% yield with >20:1 dr (92.4 mg).

R<sub>f</sub> = 0.41 (67% AcOEt in hexane). M.p. 205–210 °C.  $[\alpha]_D^{22} = -72.5$  (*c* 1.01, CHCl<sub>3</sub>). <sup>1</sup>H NMR (400 MHz, DMSO-*d*<sub>6</sub>)  $\delta$  8.04 (d, *J* = 8.2 Hz, 1H, NH), 7.95 (d, *J* = 7.3 Hz, 1H, NH), 7.88–7.86 (m, 3H,

$C_{12}H_8CHCH_2OCONH$  and  $NH$ ), 7.70 (t,  $J = 8.5$  Hz, 2H,  $C_{12}H_8CHCH_2OCONH$ ), 7.52 (d,  $J = 7.3$  Hz, 1H,  $NH$ ), 7.39 (t,  $J = 7.3$  Hz, 2H,  $C_{12}H_8CHCH_2OCONH$ ), 7.33–7.15 (m, 7H,  $C_{12}H_8CHCH_2OCONH$  and  $CHCH_2C_6H_5$ ), 4.63 (d t,  $J = 4.4$  Hz and 8.9 Hz, 1H,  $CHCH_2Ph$ ), 4.26–3.99 (m, 6H,  $CHCH_3$  and  $CHCH_3$  and  $CHCH(CH_3)_2$  and  $C_{12}H_8CHCH_2OCONH$  and  $C_{12}H_8CHCH_2OCONH$ ), 3.05 (dd,  $J = 4.4$  Hz and 14 Hz, 1H,  $CHCH_2Ph$ ), 2.81 (dd,  $J = 8.9$  Hz and 14 Hz, 1H,  $CHCH_2Ph$ ), 2.07–1.97 (m, 1H,  $CHCH(CH_3)_2$ ), 1.40 (s, 9H,  $CO_2C(CH_3)_3$ ), 1.17 (d,  $J = 7.3$  Hz, 3H,  $CHCH_3$ ), 1.14 (d,  $J = 6.9$  Hz, 3H,  $CHCH_3$ ), 0.88 (d,  $J = 5.5$  Hz, 3H,  $CHCH(CH_3)_2$ ), 0.86 (d,  $J = 5.5$  Hz, 3H,  $CHCH(CH_3)_2$ ).  $^{13}C$  NMR (100 MHz, DMSO- $d_6$ )  $\delta$  171.9, 171.7, 170.8, 170.2, 155.5, 143.7, 143.6, 140.5 (2C), 137.3 (2C), 129.0 (2C), 127.7 (2C), 127.4 (2C), 126.8 (2C), 126.0, 125.0, 119.8 (2C), 80.4, 65.4, 57.7, 53.1, 49.7, 47.9, 46.4, 37.2, 29.9, 27.4 (3C), 18.7, 18.0, 17.9, 17.8. IR (thin film,  $cm^{-1}$ ) 3291, 3054, 2967, 2931, 1705, 1641, 1531, 1475, 1445, 1391, 1313, 1221, 1143, 1110, 1078, 1045, 757. HRMS (ESI) calculated for  $C_{39}H_{48}N_4O_7Na$   $[M+Na]^+$   $m/z$  707.3420, found 707.3372.

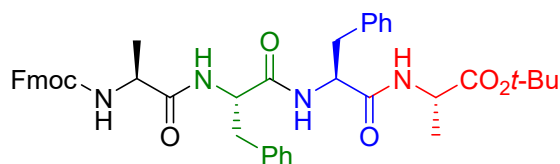

**Fmoc-L-Ala-L-Phe-L-Phe-L-Ala-Ot-Bu (6c)** was prepared following **General Procedure 2** using H-L-Phe-OH (41.3 mg, 0.250 mmol) and trimethylaluminum 2M in hexane (250  $\mu$ L, 0.500 mmol), the resulting mixture was stirred in DCM under  $N_2$  atmosphere at 0  $^\circ$ C. After 1 h, L-Ala-Ot-Bu (72.6 mg, 0.500 mmol) was added. The mixture was stirred under  $N_2$  atmosphere at ambient temperature. After 24 h, stirred solution of H-L-Phe-OH (41.3 mg, 0.250 mmol) and trimethylaluminum 2M in hexane (188  $\mu$ L, 0.375 mmol) was added into the reaction solution for further 24 h. Then, Fmoc-L-Ala-Cl (247 mg, 0.750 mmol) and pivalic acid (2.55 mg, 0.025 mmol) were added into the reaction solution and stirring under  $N_2$  atmosphere at room temperature for 24 h. The reaction mixture was purified by flash column chromatography (60% AcOEt in hexane) to provide the title compound as a white solid in 66% yield with >20:1 dr (120.8 mg).

$R_f = 0.51$  (50% AcOEt in hexane). M.p. 225–230  $^\circ$ C.  $[\alpha]_D^{22} = -89.5$  ( $c$  1.01,  $CHCl_3$ ).  $^1H$  NMR (400 MHz, DMSO- $d_6$ )  $\delta$  8.33 (d,  $J = 6.9$  Hz, 1H,  $NH$ ), 8.05 (d,  $J = 8.2$  Hz, 1H,  $NH$ ), 7.87 (d,  $J = 7.6$  Hz, 2H,  $C_{12}H_8CHCH_2OCONH$ ), 7.82 (d,  $J = 8.2$  Hz, 1H,  $NH$ ), 7.69 (t,  $J = 7.8$  Hz, 2H,  $C_{12}H_8CHCH_2OCONH$ ), 7.45–7.38 (m, 3H,  $C_{12}H_8CHCH_2OCONH$  and  $NH$ ), 7.32–7.10 (m, 12H,  $C_{12}H_8CHCH_2OCONH$  and  $CHCH_2C_6H_5$  and  $CHCH_2C_6H_5$ ), 4.55 (d t,  $J = 3.6$  Hz and 9.2 Hz, 1H,  $CHCH_2Ph$ ), 4.45 (quin.,  $J = 7.1$  Hz, 1H,  $CHCH_3$ ), 4.29–3.95 (m, 5H,  $CHCH_2Ph$  and  $C_{12}H_8CHCH_2OCONH$  and  $C_{12}H_8CHCH_2OCONH$  and  $CHCH_3$ ), 3.06 (dd,  $J = 3.6$  Hz and 14 Hz, 1H,  $CHCH_2Ph$ ), 2.93 (dd,  $J = 4.6$  Hz and 14 Hz, 1H,  $CHCH_2Ph$ ), 2.83–2.71 (m, 2H,  $CHCH_2Ph$ ), 1.39 (s, 9H,  $CO_2C(CH_3)_3$ ), 1.25 (d,  $J = 7.3$  Hz, 3H,  $CHCH_3$ ), 1.09 (d,  $J = 7.1$  Hz, 3H,  $CHCH_3$ ).  $^{13}C$  NMR

(100 MHz, DMSO- $d_6$ )  $\delta$  172.1, 171.6, 170.7, 170.6, 155.6, 143.9, 143.7, 140.7 (2C), 137.6, 137.5, 129.2 (4C), 128.0 (2C), 127.9 (2C), 127.6 (2C), 127.1 (2C), 126.2, 126.1, 125.3 (2C), 120.0 (2C), 80.4, 65.7, 53.6, 53.4, 50.0, 48.3, 46.6, 37.6, 37.4, 27.6 (3C), 18.1, 17.0. IR (thin film,  $\text{cm}^{-1}$ ) 3296, 3033, 2931, 1701, 1644, 1533, 1475, 1441, 1389, 1311, 1213, 1144, 1114, 1078, 1044, 756. HRMS (ESI) calculated for  $\text{C}_{43}\text{H}_{48}\text{N}_4\text{O}_7\text{Na}$   $[\text{M}+\text{Na}]^+$   $m/z$  755.3421, found 755.3428.

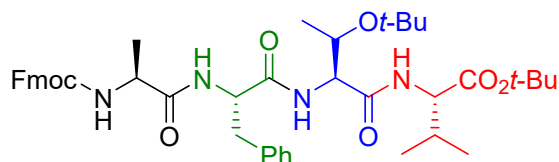

**Fmoc-L-Ala-L-Phe-L-Thr(*t*-Bu)-L-Val-*Ot*-Bu (6d)** was prepared following **General Procedure 2** using H-L-Thr(*t*-Bu)-OH (43.8 mg, 0.250 mmol) and trimethylaluminum 2M in hexane (250  $\mu\text{L}$ , 0.500 mmol), the resulting mixture was stirred in DCM under  $\text{N}_2$  atmosphere at 0  $^\circ\text{C}$ . After 1 h, L-Val-*Ot*-Bu (86.6 mg, 0.500 mmol) was added. The mixture was stirred under  $\text{N}_2$  atmosphere at ambient temperature. After 24 h, stirred solution of H-L-Phe-OH (41.3 mg, 0.250 mmol) and trimethylaluminum 2M in hexane (188  $\mu\text{L}$ , 0.375 mmol) was added into the reaction solution for further 24 h. Then, Fmoc-L-Ala-Cl (247 mg, 0.750 mmol) and pivalic acid (2.55 mg, 0.025 mmol) were added into the reaction solution and stirring under  $\text{N}_2$  atmosphere at room temperature for 24 h. The reaction mixture was purified by flash column chromatography (40% AcOEt in hexane) to provide the title compound as a white solid in 56% yield with  $>20:1$  dr (107.8 mg).

$R_f = 0.56$  (50% AcOEt in hexane). M.p. 155–160  $^\circ\text{C}$ .  $[\alpha]_D^{22} = -52.8$  ( $c$  1.01,  $\text{CHCl}_3$ ).  $^1\text{H}$  NMR (400 MHz,  $\text{CDCl}_3$ )  $\delta$  7.74 (d,  $J = 7.6$  Hz, 2H,  $\text{C}_{12}\text{H}_8\text{CHCH}_2\text{OCONH}$ ), 7.65 (br d,  $J = 8.5$  Hz, 1H,  $\text{NH}$ ), 7.58 (t,  $J = 7.4$  Hz, 2H,  $\text{C}_{12}\text{H}_8\text{CHCH}_2\text{OCONH}$ ), 7.38 (t,  $J = 7.6$  Hz, 2H,  $\text{C}_{12}\text{H}_8\text{CHCH}_2\text{OCONH}$ ), 7.31–7.06 (m, 8H,  $\text{C}_{12}\text{H}_8\text{CHCH}_2\text{OCONH}$  and  $\text{CHCH}_2\text{C}_6\text{H}_5$  and  $\text{NH}$ ), 6.86 (d,  $J = 7.3$  Hz, 1H,  $\text{NH}$ ), 5.68 (d,  $J = 7.8$  Hz, 1H,  $\text{NH}$ ), 4.86 (quin.,  $J = 6.6$  Hz, 1H,  $\text{CHCH}_3$ ), 4.39–4.29 (m, 5H,  $\text{CHCH}(\text{CH}_3)\text{OC}(\text{CH}_3)_3$  and  $\text{CHCH}(\text{CH}_3)_2$  and  $\text{C}_{12}\text{H}_8\text{CHCH}_2\text{OCONH}$  and  $\text{CHCH}(\text{CH}_3)\text{OC}(\text{CH}_3)_3$ ), 4.20–4.12 (m, 2H,  $\text{CHCH}_2\text{Ph}$  and  $\text{C}_{12}\text{H}_8\text{CHCH}_2\text{OCONH}$ ), 3.11 (dd,  $J = 5.7$  Hz and 14 Hz, 1H,  $\text{CHCH}_2\text{Ph}$ ), 3.03 (dd,  $J = 6.9$  Hz and 14 Hz, 1H,  $\text{CHCH}_2\text{Ph}$ ), 2.19–2.13 (m, 1H,  $\text{CHCH}(\text{CH}_3)_2$ ), 1.44 (s, 9H,  $\text{CO}_2\text{C}(\text{CH}_3)_3$ ), 1.33 (d,  $J = 6.6$  Hz, 3H,  $\text{CHCH}_3$ ), 1.26 (s, 9H,  $\text{CHCH}(\text{CH}_3)\text{OC}(\text{CH}_3)_3$ ), 1.01 (d,  $J = 5.5$  Hz, 3H,  $\text{CHCH}(\text{CH}_3)\text{OC}(\text{CH}_3)_3$ ), 0.94 (d,  $J = 6.7$  Hz, 3H,  $\text{CHCH}(\text{CH}_3)_2$ ), 0.90 (d,  $J = 6.7$  Hz, 3H,  $\text{CHCH}(\text{CH}_3)_2$ ).  $^{13}\text{C}$  NMR (100 MHz,  $\text{CDCl}_3$ )  $\delta$  172.1, 170.3, 170.2, 169.1, 155.8, 143.7, 141.2 (2C), 135.9, 129.1 (2C), 128.4 (2C), 127.6 (2C), 127.0 (2C), 126.9, 125.1, 125.0 (2C), 119.8 (2C), 81.5, 75.3, 66.9, 66.3, 57.8, 57.3, 54.0, 50.3, 47.0, 38.3, 30.8, 28.1 (3C), 28.0 (3C), 19.0, 18.6, 17.5, 16.8. IR (thin film,  $\text{cm}^{-1}$ ) 3302, 3024, 2967, 2931, 1705, 1645, 1531, 1475, 1455, 1391, 1313, 1221, 1144, 1115, 1075, 1045, 756. HRMS (ESI) calculated for  $\text{C}_{44}\text{H}_{58}\text{N}_4\text{O}_8\text{Na}$   $[\text{M}+\text{Na}]^+$   $m/z$  793.4152, found 793.4159.

## 7. Procedure for Pentapeptide Synthesis

### 7-1. Pentapeptide Synthesis

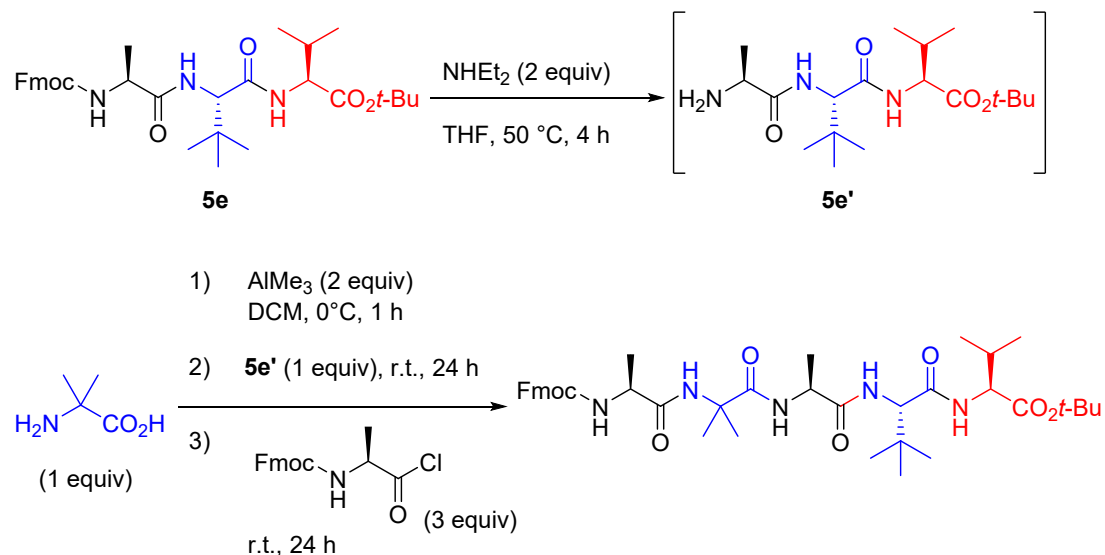

**Procedure:** To a flame dried round-bottom flask charged with **5e** (145 mg, 0.250 mmol) and THF (5 mL), ~~were added~~ diethylamine (52.2  $\mu\text{L}$ , 0.500 mmol) was added. The reaction mixture was stirred in an oil bath at 50 °C for 4 h. After completion of the reaction, ~~distilled off~~ THF and diethylamine were distilled in vacuo using an evaporator. The residue **5e'** was used for next reaction without purification as **5e'**.

**Fmoc-L-Ala-Aib-L-Ala-L-Tle-L-Val-Ot-Bu (7a)** was prepared as follows ~~procedure below~~. A mixture of H-Aib-OH (25.8 mg, 0.250 mmol), trimethylaluminum 2M in hexane (250  $\mu\text{L}$ , 0.500 mmol), and dry DCM (1 mL) in a flame-dried 20 mL test tube equipped with a magnetic stirring bar was stirred vigorously for 1 h at 0 °C under  $\text{N}_2$  atmosphere. Then, **5e'** was added to the above reaction solution. The mixture was allowed to stir vigorously under  $\text{N}_2$  atmosphere at room temperature for 24 h. Then, Fmoc-L-Ala-Cl (247 mg, 0.750 mmol) was added to the reaction solution, and stirring was continued under  $\text{N}_2$  atmosphere at room temperature for 24 h. The reaction mixture was then diluted with  $\text{CHCl}_3$  (4.50 mL), transferred onto  $\text{SiO}_2$  column using ~~by~~ a pipette, and the used test tube ~~via~~ and pipette were washed with  $\text{CHCl}_3$  (2 x 4.00 mL). The reaction mixture was purified by flash column chromatography (82% EtOAc in hexane) to provide the corresponding pentapeptide as white solid in 34 % yield with >20:1 dr (62.5 mg).

$R_f$  = 0.26 (80% AcOEt in hexane). M.p. 115–120 °C.  $[\alpha]_D^{20}$  =  $-32.8$  ( $c$  1.11,  $\text{CHCl}_3$ ).  $^1\text{H NMR}$  (400 MHz,  $\text{CDCl}_3$ )  $\delta$  7.74 (d,  $J$  = 7.6 Hz, 2H,  $\text{C}_{12}\text{H}_8\text{CHCH}_2\text{OCONH}$ ), 7.56 (dd,  $J$  = 3.9 Hz and 7.4 Hz, 2H,  $\text{C}_{12}\text{H}_8\text{CHCH}_2\text{OCONH}$ ), 7.38 (t,  $J$  = 7.6 Hz, 2H,  $\text{C}_{12}\text{H}_8\text{CHCH}_2\text{OCONH}$ ), 7.30–7.21 (m, 4H,

$C_{12}H_{18}CHCH_2OCONH$  and  $NH$ ), 7.12 (br s, 1H,  $NH$ ), 7.06 (br d,  $J = 8.5$  Hz, 1H,  $NH$ ), 6.00 (d,  $J = 6.0$  Hz, 1H,  $NH$ ), 4.61–4.52 (m, 2H,  $CHCH_3$  and  $CHC(CH_3)_3$ ), 4.40–4.32 (m, 3H,  $C_{12}H_8CHCH_2OCONH$  and  $CHCH(CH_3)_2$ ), 4.27–4.19 (m, 2H,  $CHCH_3$  and  $C_{12}H_8CHCH_2OCONH$ ), 2.13–2.03 (m, 1H,  $CHCH(CH_3)_2$ ), 1.54 (s, 3H,  $C(CH_3)_2$ ), 1.53 (s, 3H,  $C(CH_3)_2$ ), 1.42 (s, 9H,  $CO_2C(CH_3)_3$ ), 1.37 (d,  $J = 7.1$  Hz, 3H,  $CHCH_3$ ), 1.34 (d,  $J = 7.1$  Hz, 3H,  $CHCH_3$ ), 0.99 (s, 9H,  $CHC(CH_3)_3$ ), 0.89 (d,  $J = 6.9$  Hz, 3H,  $CHCH(CH_3)_2$ ), 0.84 (d,  $J = 6.9$  Hz, 3H,  $CHCH(CH_3)_2$ ).  $^{13}C$  NMR (100 MHz,  $CDCl_3$ )  $\delta$  174.1, 172.6, 172.5, 170.8, 170.5, 156.4, 143.7, 143.6, 141.2 (2C), 127.7 (2C), 127.0 (2C), 125.0 (2C), 119.9 (2C), 81.7, 67.1, 60.6, 57.9, 56.9, 51.2, 49.6, 47.0, 34.6, 31.1, 27.9 (3C), 26.7 (3C), 25.2, 24.9, 18.9, 18.3, 18.1, 18.0. IR (thin film,  $cm^{-1}$ ) 3305, 3012, 2967, 1707, 1645, 1530, 1478, 1368, 1297, 1192, 1115, 1077, 1045, 764. HRMS (ESI) calculated for  $C_{40}H_{57}N_5O_8Na$   $[M+Na]^+$   $m/z$  758.4105, found 758.4120.

## 7-2. One-Pot Pentapeptide Synthesis

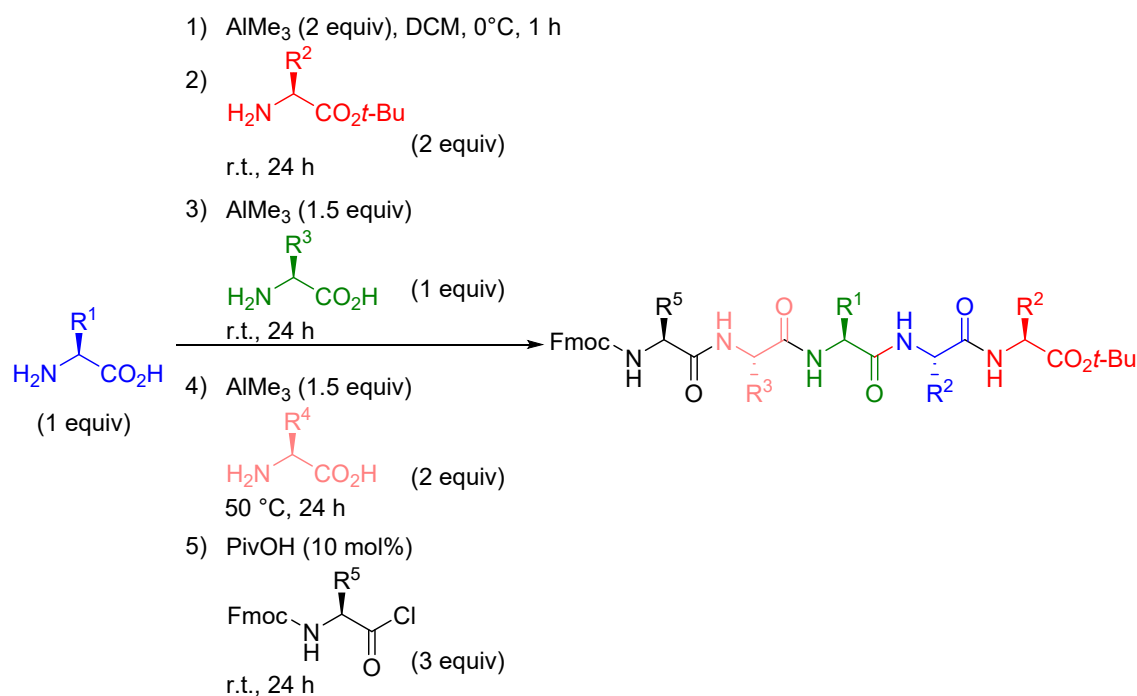

**General procedure 3:** A mixture of L-amino acid (0.250 mmol), trimethylaluminum 2M in hexane (250  $\mu L$ , 0.500 mmol), and dry DCM (1 mL) in a flame-dried 20 mL test tube equipped with a magnetic stirring bar was stirred vigorously for 1 h at  $0^\circ C$  under  $N_2$  atmosphere. Then, L-amino acid *tert*-butyl ester (0.500 mmol) was added to the above reaction solution. The mixture was allowed to stir vigorously under  $N_2$  atmosphere at room temperature for 24 h. Then, a solution of trimethylaluminum 2M in hexane (188  $\mu L$ , 0.375 mmol) and L-amino acid (0.250 mmol), which was

stirred for 1 h, was added. After 24 h, a solution of trimethylaluminum 2M in hexane (250  $\mu$ L, 0.500 mmol) and L-amino acid (0.500 mmol), which was stirred for 1 h, was added. And the mixture was allowed to stir vigorously under N<sub>2</sub> atmosphere at 50 °C for 24 h. Then, Fmoc-L-amino acid chloride and pivalic acid (2.55 mg, 0.025 mmol) were added to the reaction solution, and stirring continued under N<sub>2</sub> atmosphere at room temperature for 24 h. The reaction mixture was then diluted with CHCl<sub>3</sub> (4.50 mL), transferred to a SiO<sub>2</sub> column using pipette; and the used test tube and pipette were washed with CHCl<sub>3</sub> (2 x 4.00 mL). The reaction mixture was purified by flash column chromatography (50–100% EtOAc in hexane) to provide the corresponding tetrapeptide as white solid.

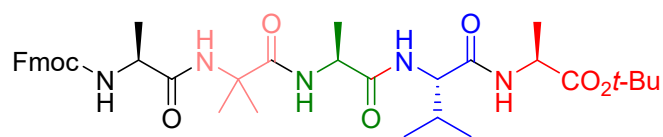

**Fmoc-L-Ala-Aib-L-Ala-L-Val-L-Ala-Ot-Bu (7b)** was prepared following **General Procedure 3** using H-L-Val-OH (29.3 mg, 0.250 mmol) and trimethylaluminum 2M in hexane (250  $\mu$ L, 0.500 mmol), the resulting mixture was stirred in DCM under N<sub>2</sub> atmosphere at 0 °C. After 1 h, L-Ala-Ot-Bu (72.6 mg, 0.500 mmol) was added. The mixture was stirred under N<sub>2</sub> atmosphere at ambient temperature. After 24 h, stirred solution of H-L-Ala-OH (22.3 mg, 0.250 mmol) and trimethylaluminum 2M in hexane (188  $\mu$ L, 0.375 mmol) was added. After 24 h, a solution of trimethylaluminum 2M in hexane (250  $\mu$ L, 0.500 mmol) and H-Aib-OH (51.6 mg, 0.500 mmol), which was stirred for 1 h, was added. And the mixture was allowed to stir vigorously under N<sub>2</sub> atmosphere at 50 °C for 24 h. Then, Fmoc-L-Ala-Cl (247 mg, 0.750 mmol) and pivalic acid (2.55 mg, 0.025 mmol) were added into the reaction solution and stirring under N<sub>2</sub> atmosphere at room temperature for 24 h. The reaction mixture was purified by flash column chromatography (AcOEt) to provide the title compound as a white solid in 60% yield with >20:1 dr (104.0 mg).

$R_f$  = 0.28 (AcOEt). M.p. 85–90 °C.  $[\alpha]_D^{21} = -34.5$  ( $c$  1.16, CHCl<sub>3</sub>). <sup>1</sup>H NMR (400 MHz, CDCl<sub>3</sub>)  $\delta$  7.73 (d,  $J$  = 7.6 Hz, 2H, C<sub>12</sub>H<sub>8</sub>CHCH<sub>2</sub>OCONH), 7.58 (d,  $J$  = 7.6 Hz, 2H, C<sub>12</sub>H<sub>8</sub>CHCH<sub>2</sub>OCONH), 7.41–7.23 (m, 8H, C<sub>12</sub>H<sub>8</sub>CHCH<sub>2</sub>OCONH and NH and NH and NH and NH), 6.72 (d,  $J$  = 2.5 Hz, 1H, NH), 4.48–4.21 (m, 6H, CHCH<sub>3</sub> and CHCH<sub>3</sub> and CHCH<sub>3</sub> and CHCH(CH<sub>3</sub>)<sub>2</sub> and C<sub>12</sub>H<sub>8</sub>CHCH<sub>2</sub>OCONH), 3.98–3.95 (m, 1H, C<sub>12</sub>H<sub>8</sub>CHCH<sub>2</sub>OCONH), 2.45–2.36 (m, 1H, CHCH(CH<sub>3</sub>)<sub>2</sub>), 1.52 (s, 3H, C(CH<sub>3</sub>)<sub>2</sub>), 1.44 (s, 3H, C(CH<sub>3</sub>)<sub>2</sub>), 1.42 (s, 9H, CO<sub>2</sub>C(CH<sub>3</sub>)<sub>3</sub>), 1.42–1.36 (m, 9H, CHCH<sub>3</sub> and CHCH<sub>3</sub> and CHCH<sub>3</sub>), 0.96 (d,  $J$  = 6.9 Hz, 3H, CHCH(CH<sub>3</sub>)<sub>2</sub>), 0.93 (d,  $J$  = 6.9 Hz, 3H, CHCH(CH<sub>3</sub>)<sub>2</sub>). <sup>13</sup>C NMR (100 MHz, CDCl<sub>3</sub>)  $\delta$  174.8, 173.9, 173.5, 171.7, 171.4, 157.4, 143.6, 143.5, 141.2 (2C), 127.8 (2C), 127.1 (2C), 124.9, 124.8, 119.9 (2C), 81.2, 67.4, 58.6, 56.6, 53.0, 50.9, 49.1, 47.0, 29.8, 27.8 (3C), 26.9, 23.6, 19.3, 17.7, 17.5, 17.4, 16.9. IR (thin film, cm<sup>-1</sup>) 3307, 2979, 2935, 1642, 1530, 1450, 1382, 1368, 1298, 1251, 1192, 1151, 1118, 1077, 1033, 847.

HRMS (ESI) calculated for  $C_{37}H_{51}N_5O_8Na$   $[M+Na]^+$   $m/z$  716.3635, found 716.3607.

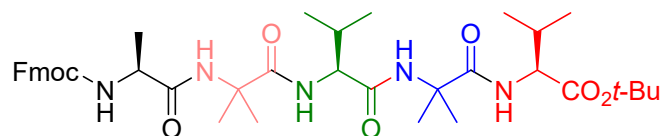

**Fmoc-L-Ala-Aib-L-Val-Aib-L-Val-Ot-Bu (7c)** was prepared following **General Procedure 3** using H-Aib-OH (25.8 mg, 0.250 mmol) and trimethylaluminum 2M in hexane (250  $\mu$ L, 0.500 mmol), the resulting mixture was stirred in DCM under  $N_2$  atmosphere at 0  $^\circ$ C. After 1 h, L-Val-Ot-Bu (86.6 mg, 0.500 mmol) was added. The mixture was stirred under  $N_2$  atmosphere at ambient temperature. After 24 h, stirred solution of H-L-Val-OH (29.3 mg, 0.250 mmol) and trimethylaluminum 2M in hexane (188  $\mu$ L, 0.375 mmol) was added. After 24 h, a solution of trimethylaluminum 2M in hexane (250  $\mu$ L, 0.500 mmol) and H-Aib-OH (51.6 mg, 0.500 mmol), which was stirred for 1 h, was added. And the mixture was allowed to stir vigorously under  $N_2$  atmosphere at 50  $^\circ$ C for 24 h. Then, Fmoc-L-Ala-Cl (247 mg, 0.750 mmol) and pivalic acid (2.55 mg, 0.025 mmol) were added into the reaction solution and stirring under  $N_2$  atmosphere at room temperature for 24 h. The reaction mixture was purified by flash column chromatography (82% AcOEt in hexane) to provide the title compound as a white solid in 51% yield with >20:1 dr (93.8 mg).

$R_f$  = 0.23 (80% AcOEt in hexane). M.p. 95–100  $^\circ$ C.  $[\alpha]_D^{21} = -45.0$  ( $c$  1.01,  $CHCl_3$ ).  $^1H$  NMR (400 MHz,  $CDCl_3$ )  $\delta$  7.74 (d,  $J$  = 7.6 Hz, 2H,  $C_{12}H_8CHCH_2OCONH$ ), 7.56 (t,  $J$  = 6.9 Hz, 2H,  $C_{12}H_8CHCH_2OCONH$ ), 7.38 (t,  $J$  = 7.6 Hz, 2H,  $C_{12}H_8CHCH_2OCONH$ ), 7.31–7.26 (m, 3H,  $C_{12}H_8CHCH_2OCONH$  and  $NH$ ), 7.16 (br s, 1H,  $NH$ ), 7.02 (br d,  $J$  = 8.9 Hz, 1H,  $NH$ ), 6.96 (br d,  $J$  = 8.5 Hz, 1H,  $NH$ ), 6.63 (d,  $J$  = 3.0 Hz, 1H,  $NH$ ), 4.36–4.29 (m, 3H,  $CHCH_3$  and  $C_{12}H_8CHCH_2OCONH$ ), 4.25–4.19 (m, 2H,  $CHCH(CH_3)_2$  and  $C_{12}H_8CHCH_2OCONH$ ), 4.05–3.99 (m, 1H,  $CHCH(CH_3)_2$ ), 2.50–2.42 (m, 1H,  $CHCH(CH_3)_2$ ), 2.02–1.93 (m, 1H,  $CHCH(CH_3)_2$ ), 1.57 (s, 3H,  $C(CH_3)_2$ ), 1.56 (s, 3H,  $C(CH_3)_2$ ), 1.47 (s, 3H,  $C(CH_3)_2$ ), 1.42 (s, 3H,  $C(CH_3)_2$ ), 1.40 (d,  $J$  = 6.9 Hz, 3H,  $CHCH_3$ ), 1.39 (s, 9H,  $CO_2C(CH_3)_3$ ), 0.88 (d,  $J$  = 6.8 Hz, 3H,  $CHCH(CH_3)_2$ ), 0.83–0.78 (m, 9H,  $CHCH(CH_3)_2$  and  $CHCH(CH_3)_2$  and  $CHCH(CH_3)_2$ ).  $^{13}C$  NMR (100 MHz,  $CDCl_3$ )  $\delta$  175.1, 174.7, 173.7, 170.9, 170.7, 157.3, 143.6, 143.3, 141.2, 141.1, 127.8 (2C), 127.1 (2C), 124.8 (2C), 120.0 (2C), 81.3, 67.5, 58.9, 57.1, 56.9, 53.0, 46.8, 30.8, 28.8, 27.8 (3C), 27.4, 25.9, 24.9, 23.3, 19.4, 18.9, 18.5, 17.1 (2C), 17.0. IR (thin film,  $cm^{-1}$ ) 3309, 3018, 1664, 1525, 1451, 1368, 1296, 1214, 1159, 1078, 1035, 744. HRMS (ESI) calculated for  $C_{40}H_{57}N_5O_8Na$   $[M+Na]^+$   $m/z$  758.4105, found 758.4128.



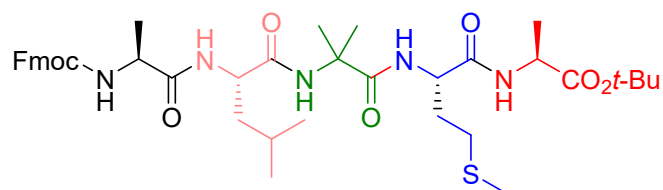

**Fmoc-L-Ala-L-Leu-Aib-L-Met-L-Ala-Ot-Bu (7d)** was prepared following **General Procedure 3** using H-Met-OH (37.3 mg, 0.250 mmol) and trimethylaluminum 2M in hexane (250  $\mu$ L, 0.500 mmol), the resulting mixture was stirred in DCM under  $N_2$  atmosphere at 0  $^\circ$ C. After 1 h, L-Ala-Ot-Bu (72.6 mg, 0.500 mmol) was added. The mixture was stirred under  $N_2$  atmosphere at ambient temperature. After 24 h, stirred solution of H-Aib-OH (25.8 mg, 0.250 mmol) and trimethylaluminum 2M in hexane (188  $\mu$ L, 0.375 mmol) was added. After 24 h, a solution of trimethylaluminum 2M in hexane (250  $\mu$ L, 0.500 mmol) and H-L-Leu-OH (65.6 mg, 0.500 mmol), which was stirred for 1 h, was added. And the mixture was allowed to stir vigorously under  $N_2$  atmosphere at 50  $^\circ$ C for 24 h. Then, Fmoc-L-Ala-Cl (247 mg, 0.750 mmol) and pivalic acid (2.55 mg, 0.025 mmol) were added into the reaction solution and stirring under  $N_2$  atmosphere at room temperature for 24 h. The reaction mixture was purified by flash column chromatography (75% AcOEt in hexane) to provide the title compound as a white solid in 60% yield with >20:1 dr (115.1 mg).

$R_f = 0.41$  (75% AcOEt in hexane). M.p. 75–80  $^\circ$ C.  $[\alpha]_D^{23} = -62.1$  ( $c$  1.03,  $CHCl_3$ ).  $^1H$  NMR (400 MHz,  $CDCl_3$ )  $\delta$  7.75 (d,  $J = 7.4$  Hz, 2H,  $C_{12}H_8CHCH_2OCONH$ ), 7.59 (t,  $J = 8.2$  Hz, 2H,  $C_{12}H_8CHCH_2OCONH$ ), 7.46 (br d,  $J = 7.4$  Hz, 1H,  $NH$ ), 7.40 (t,  $J = 7.3$  Hz, 2H,  $C_{12}H_8CHCH_2OCONH$ ), 7.33–7.23 (m, 3H,  $C_{12}H_8CHCH_2OCONH$  and  $NH$ ), 7.07 (br s, 1H,  $NH$ ), 6.97 (br d,  $J = 5.3$  Hz, 1H,  $NH$ ), 6.09 (br d,  $J = 3.2$  Hz, 1H,  $NH$ ), 4.55–4.49 (m, 1H,  $CHCH_2CH_2SCH_3$ ), 4.46–4.34 (m, 3H,  $CHCH_3$  and  $C_{12}H_8CHCH_2OCONH$ ), 4.24–4.19 (m, 1H,  $C_{12}H_8CHCH_2OCONH$ ), 4.12–4.06 (m, 2H,  $CHCH_2CH(CH_3)_2$  and  $CHCH_3$ ), 2.61–2.48 (m, 2H,  $CHCH_2CH_2SCH_3$ ), 2.36–2.30 (m, 1H,  $CHCH_2CH_2SCH_3$ ), 2.13–2.05 (m, 1H,  $CHCH_2CH_2SCH_3$ ), 2.02 (s, 3H,  $CHCH_2CH_2SCH_3$ ), 1.71–1.53 (m, 3H,  $CHCH_2CH(CH_3)_2$  and  $CHCH_2CH(CH_3)_2$ ), 1.53 (s, 3H,  $C(CH_3)_2$ ), 1.45–1.37 (m, 18H,  $C(CH_3)_2$  and  $CHCH_3$  and  $CHCH_3$  and  $CO_2C(CH_3)_3$ ), 0.93 (d,  $J = 6.0$  Hz, 3H,  $CHCH_2CH(CH_3)_2$ ), 0.88 (d,  $J = 6.0$  Hz, 3H,  $CHCH_2CH(CH_3)_2$ ).  $^{13}C$  NMR (100 MHz,  $CDCl_3$ )  $\delta$  174.3, 172.2, 172.0 (2C), 171.4, 156.9, 143.6, 143.4, 141.2, 127.8 (2C), 127.1 (2C), 124.9, 124.8, 120.0 (2C), 81.3, 67.2, 57.1, 53.9, 52.9, 52.1, 49.1, 47.0, 39.5, 30.7, 30.6, 27.9 (3C), 26.3, 24.9, 24.4, 22.7, 21.8, 17.6, 17.3, 15.2 (2C). IR (thin film,  $cm^{-1}$ ) 3308, 3018, 1656, 1528, 1450, 1368, 1297, 1214, 1152, 746. HRMS (ESI) calculated for  $C_{40}H_{57}N_5O_8SNa$   $[M+Na]^+$   $m/z$  790.3826, found 790.3829.

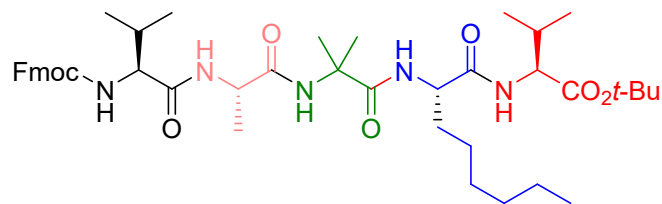

**Fmoc-L-Val-L-Ala-Aib-L-Aoc(2)-L-Val-Ot-Bu (7e)** was prepared following **General Procedure 3**

using H-Aoc(2)-OH (39.8 mg, 0.250 mmol) and trimethylaluminum 2M in hexane (250  $\mu$ L, 0.500 mmol), the resulting mixture was stirred in DCM under  $N_2$  atmosphere at 0  $^{\circ}$ C. After 1 h, L-Val-Ot-Bu (86.6 mg, 0.500 mmol) was added. The mixture was stirred under  $N_2$  atmosphere at ambient temperature. After 24 h, stirred solution of H-Aib-OH (25.8 mg, 0.250 mmol) and trimethylaluminum 2M in hexane (188  $\mu$ L, 0.375 mmol) was added. After 24 h, a solution of trimethylaluminum 2M in hexane (250  $\mu$ L, 0.500 mmol) and H-L-Ala-OH (44.6 mg, 0.500 mmol), which was stirred for 1 h, was added. And the mixture was allowed to stir vigorously under  $N_2$  atmosphere at 50  $^{\circ}$ C for 24 h. Then, Fmoc-L-Val-Cl (268 mg, 0.750 mmol) and pivalic acid (2.55 mg, 0.025 mmol) were added into the reaction solution and stirring under  $N_2$  atmosphere at room temperature for 24 h. The reaction mixture was purified by flash column chromatography (80% AcOEt in hexane) to provide the title compound as a white solid in 53% yield with >20:1 dr (104.9 mg).

$R_f$  = 0.34 (80% AcOEt in hexane). M.p. 135–142  $^{\circ}$ C.  $[\alpha]_D^{23}$  =  $-48.0$  ( $c$  1.03,  $CHCl_3$ ).  $^1H$  NMR (400 MHz,  $CDCl_3$ )  $\delta$  7.74 (d,  $J$  = 7.6 Hz, 2H,  $C_{12}H_8CHCH_2OCONH$ ), 7.57 (d,  $J$  = 7.6 Hz, 2H,  $C_{12}H_8CHCH_2OCONH$ ), 7.40–7.25 (m, 6H,  $C_{12}H_8CHCH_2OCONH$  and  $NH$  and  $NH$ ), 7.17 (br d,  $J$  = 7.4 Hz, 1H,  $NH$ ), 7.06 (br s, 1H,  $NH$ ), 6.00 (br d,  $J$  = 6.6 Hz, 1H,  $NH$ ), 4.48–4.39 (m, 2H,  $CHCH_3$  and  $CHCH_2CH_2CH_2CH_2CH_2CH_3$ ), 4.33–4.29 (m, 2H,  $C_{12}H_8CHCH_2OCONH$ ), 4.26–4.19 (m, 2H,  $CHCH(CH_3)_2$  and  $CHCH(CH_3)_2$ ), 3.97 (t,  $J$  = 6.6 Hz, 1H,  $C_{12}H_8CHCH_2OCONH$ ), 2.23–2.04 (m, 2H,  $CHCH(CH_3)_2$  and  $CHCH(CH_3)_2$ ), 2.00–1.93 (m, 1H,  $CHCH_2CH_2CH_2CH_2CH_2CH_3$ ), 1.75–1.69 (m, 1H,  $CHCH_2CH_2CH_2CH_2CH_2CH_3$ ), 1.54 (s, 3H,  $C(CH_3)_2$ ), 1.47 (s, 3H,  $C(CH_3)_2$ ), 1.45 (s, 9H,  $CO_2C(CH_3)_3$ ), 1.38 (d,  $J$  = 6.9 Hz, 3H,  $CHCH_3$ ), 1.33–1.22 (m, 8H,  $CHCH_2CH_2CH_2CH_2CH_2CH_3$  and  $CHCH_2CH_2CH_2CH_2CH_2CH_3$  and  $CHCH_2CH_2CH_2CH_2CH_2CH_3$  and  $CHCH_2CH_2CH_2CH_2CH_2CH_3$ ), 0.98–0.92 (m, 12H,  $CHCH(CH_3)_2$  and  $CHCH(CH_3)_2$ ), 0.82 (t,  $J$  = 6.6 Hz, 3H,  $CHCH_2CH_2CH_2CH_2CH_2CH_3$ ).  $^{13}C$  NMR (100 MHz,  $CDCl_3$ )  $\delta$  174.1, 172.5, 172.3, 172.2, 170.8, 156.9, 143.7, 143.5, 141.2, 127.7 (2C), 127.0 (2C), 125.0, 124.9, 119.9 (2C), 81.5, 67.1, 61.1, 58.5, 57.1, 54.0, 50.8, 47.0, 32.0, 31.6, 30.7, 30.5, 28.9, 27.9 (3C), 26.1, 25.8, 24.4, 22.5 (2C), 19.2, 18.9, 18.2, 17.1, 13.9 (2C). IR (thin film,  $cm^{-1}$ ) 3315, 2964, 2930, 2248, 1706, 1644, 1524, 1450, 1368, 1275, 1227, 1148, 1031, 907, 726. HRMS (ESI) calculated for  $C_{44}H_{65}N_5O_8Na$   $[M+Na]^+$   $m/z$  814.4730, found 814.4721.

## 8. Procedure for Time Course of Gas Generation

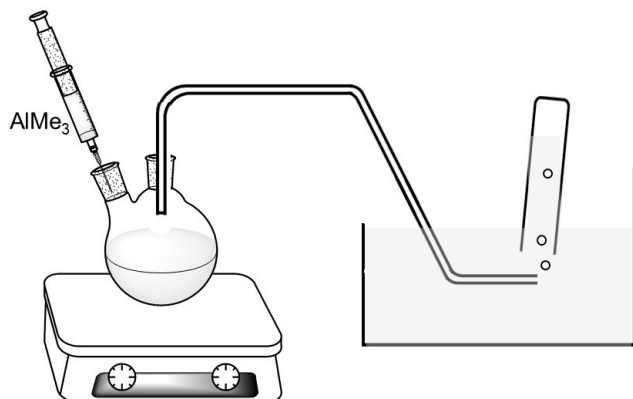

Gases were measured in volume by displacement over water and yields were calculated based on ideal gas ( $1 \text{ mmol} = 22.4 \text{ mL}$ ).

A flame-dried 50 mL two-necked flask with a magnetic stirring bar was charged with substrate (1 mmol) and dichloromethane (5 mL) under  $\text{N}_2$  atmosphere. One of the necks of the flask was connected by a tube to an inverted graduated cylinder filled with water. Then, trimethylaluminum 2M in hexane ( $550 \mu\text{L}$ , 1.1 mmol) was added under room temperature.

Benzylamine; gas was barely detected.

3-Phenylpropionic acid; 22 mL of gas was gathered within 10 min. And no further gasses were observed.

Phenylalanine; 27 mL of gas was gathered within 10 min. Gasses were gradually generated thereafter, and finally 44 mL of gasses could be gathered for one hour.

## 9. HPLC data

Conditions:

Chiral Column:

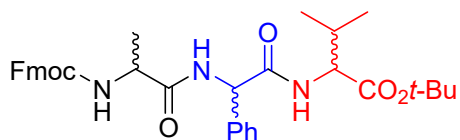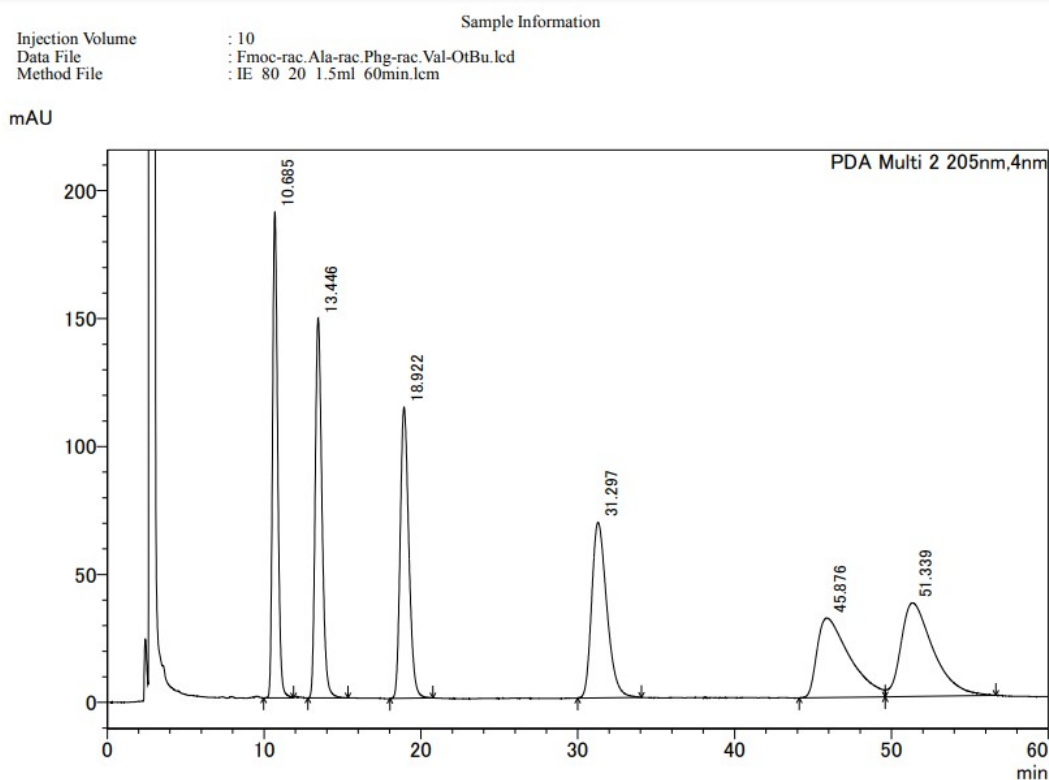

Peak Table

| Peak# | Ret. Time | Area     | Area%   |
|-------|-----------|----------|---------|
| 1     | 10.685    | 4303848  | 15.748  |
| 2     | 13.446    | 4427188  | 16.199  |
| 3     | 18.922    | 4330797  | 15.846  |
| 4     | 31.297    | 4590956  | 16.798  |
| 5     | 45.876    | 4462308  | 16.327  |
| 6     | 51.339    | 5215011  | 19.082  |
| Total |           | 27330107 | 100.000 |

Retention time (min.);

Fmoc-D-Ala-L-Phe-L-Val-Ot-Bu; 31.297

Fmoc-L-Ala-D-Phe-L-Val-Ot-Bu; 45.8767

Fmoc-D-Ala-L-Phe-D-Val-Ot-Bu; 18.922

Fmoc-L-Ala-L-Phe-L-Val-Ot-Bu; 10.685

**Result;**

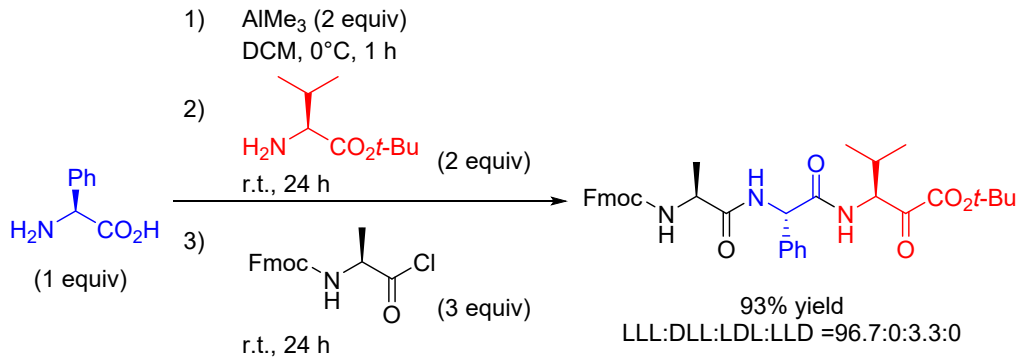

Injection Volume : 10  
Data File : TH19-28.lcd  
Method File : IE 80 20 1.5ml 60min.lcm

Sample Information

mAU

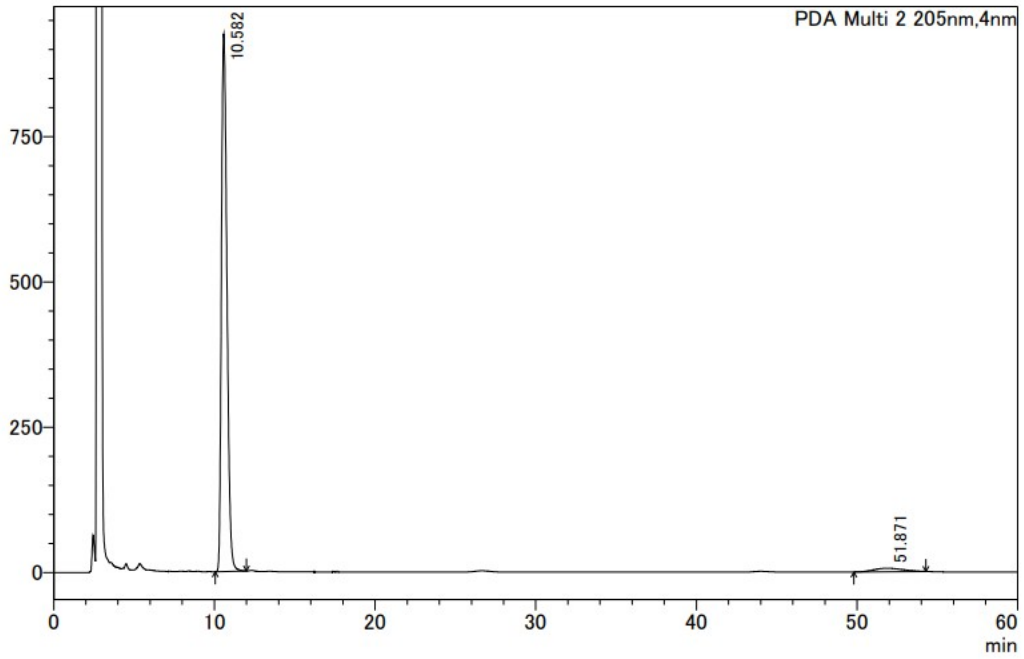

Peak Table

| PDA Ch2 205nm |           |          |         |
|---------------|-----------|----------|---------|
| Peak#         | Ret. Time | Area     | Area%   |
| 1             | 10.582    | 22151689 | 96.682  |
| 2             | 51.871    | 760208   | 3.318   |
| Total         |           | 22911897 | 100.000 |

Conditions:

Chiral Column:

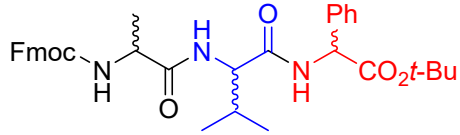

Racemic

Sample Information  
Injection Volume : 10  
Data File : Fmoc-rac.Ala-rac.Val-rac.Phg-OtBu.lcd  
Method File : IE 80 20 1.5ml 45min.lcm

mAU

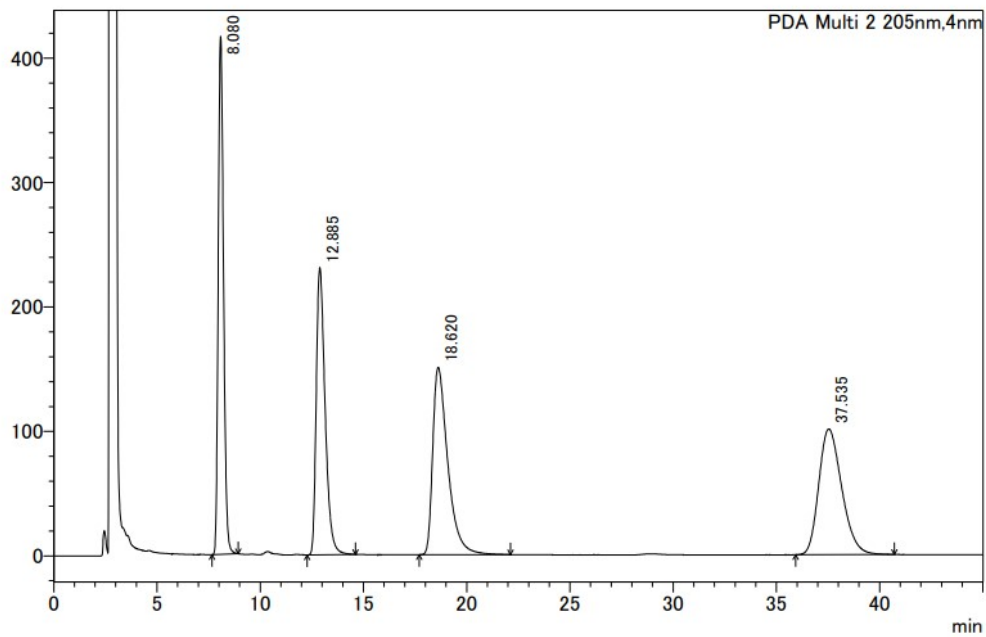

Peak Table

| Peak# | Ret. Time | Area     | Area%   |
|-------|-----------|----------|---------|
| 1     | 8.080     | 7427979  | 24.984  |
| 2     | 12.885    | 6860904  | 23.076  |
| 3     | 18.620    | 7626497  | 25.651  |
| 4     | 37.535    | 7816088  | 26.289  |
| Total |           | 29731468 | 100.000 |

Retention time (min.);

Fmoc-D-Ala-L-Val-L-Phe-Ot-Bu; 37.535

Fmoc-D-Ala-L-Val-L-Phe-Ot-Bu; 18.620

Fmoc-D-Ala-L-Val-L-Phe-Ot-Bu; 12.885

Fmoc-D-Ala-L-Val-L-Phe-Ot-Bu; 8.080

**Result;**

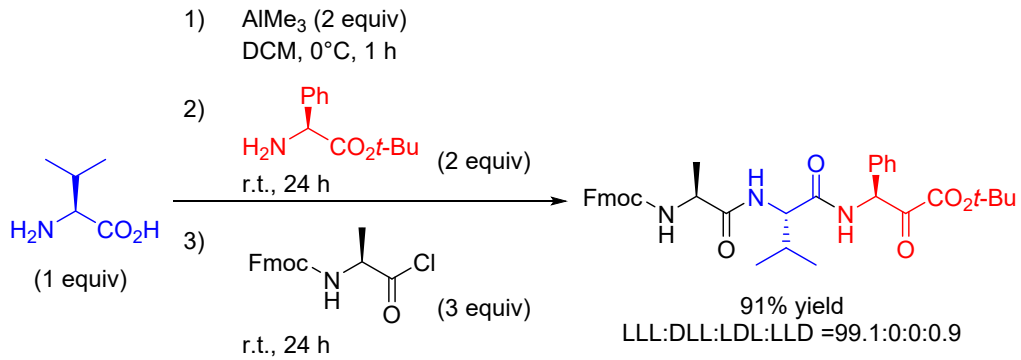

Injection Volume : 10  
Data File : Fmoc-L-Ala-L-Val-L-Phe-OtBu.lcd  
Method File : IE 80 20 1.5ml 45min.lcm

Sample Information

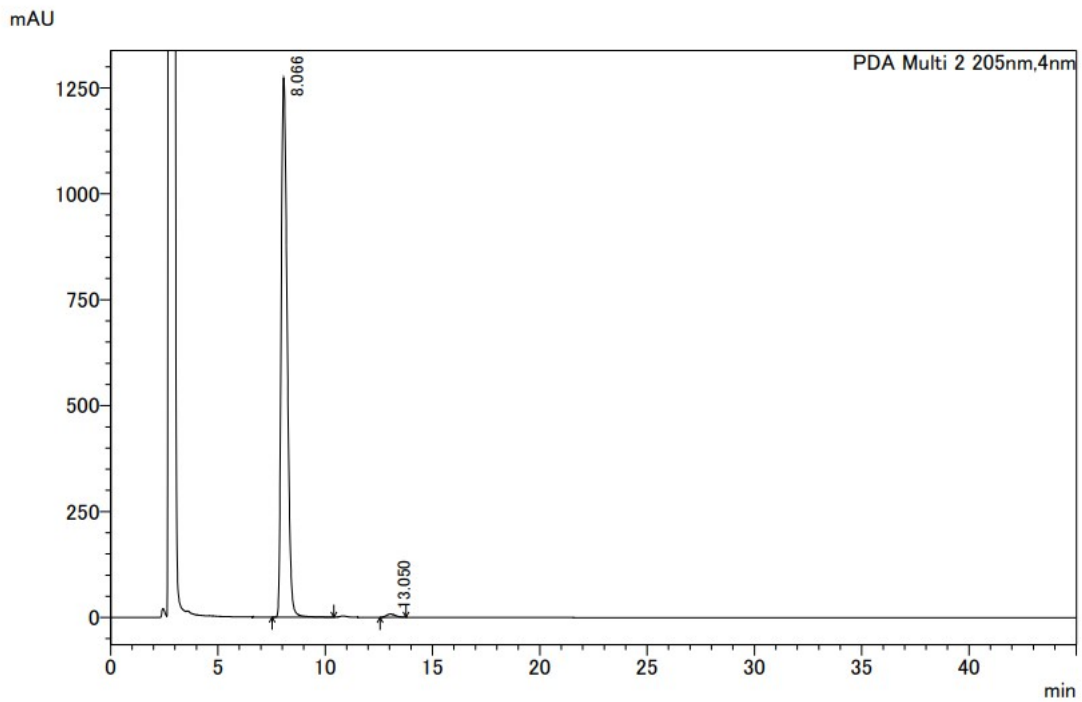

Peak Table

| PDA Ch2 205nm |           |          |         |
|---------------|-----------|----------|---------|
| Peak#         | Ret. Time | Area     | Area%   |
| 1             | 8.066     | 24664541 | 99.107  |
| 2             | 13.050    | 222177   | 0.893   |
| Total         |           | 24886717 | 100.000 |

10. NMR data  $^1\text{H}$  NMR (400 MHz,  $\text{CDCl}_3$ ) of **5a**

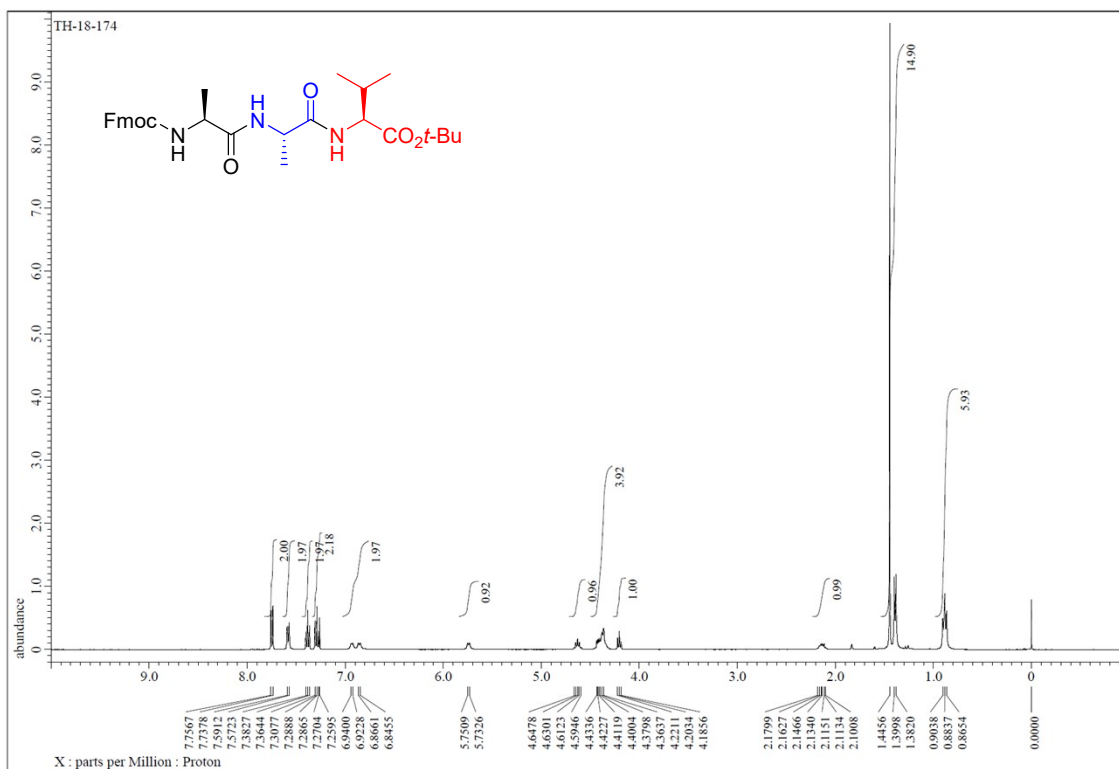

$^{13}\text{C}$  NMR (100 MHz,  $\text{CDCl}_3$ ) of **5a**

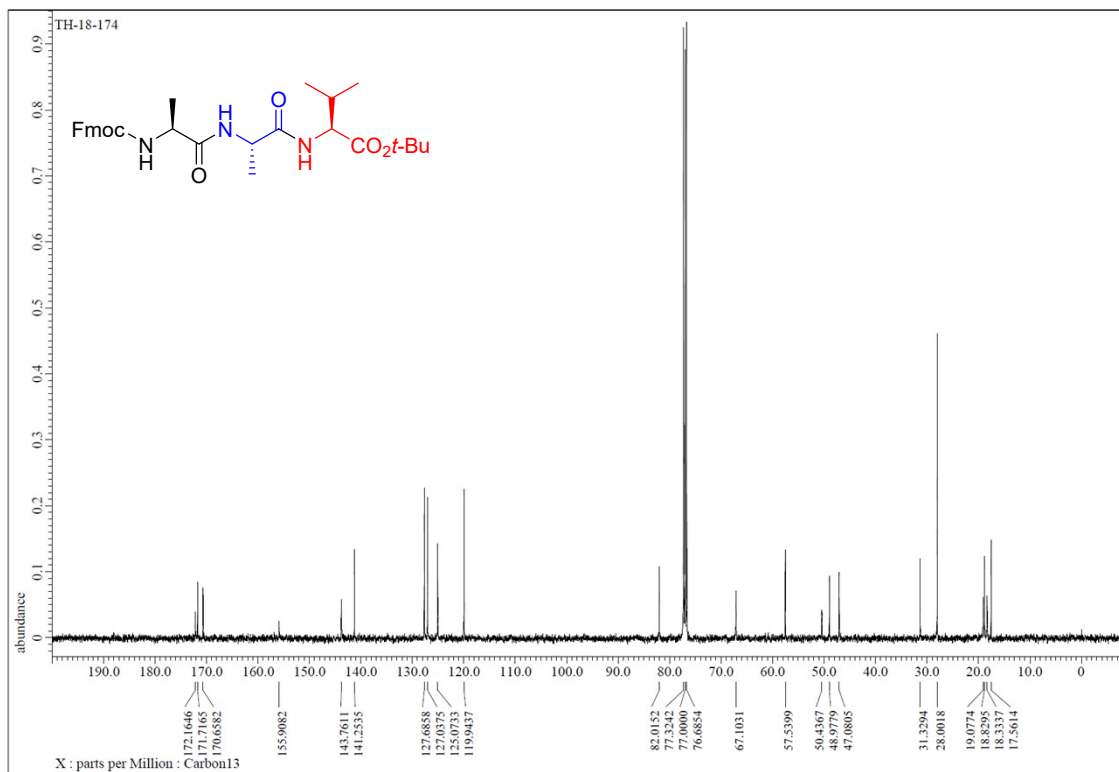



<sup>1</sup>H NMR (400 MHz, CDCl<sub>3</sub>) of **5b**

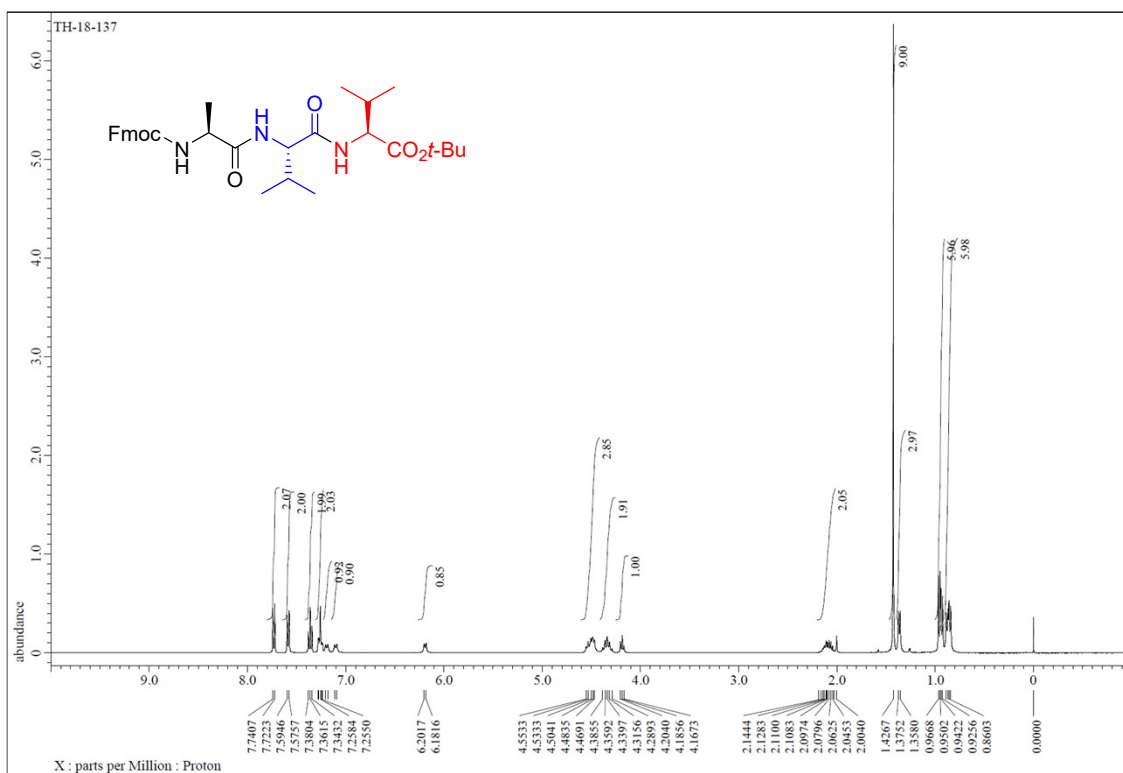

<sup>13</sup>C NMR (100 MHz, CDCl<sub>3</sub>) of **5b**

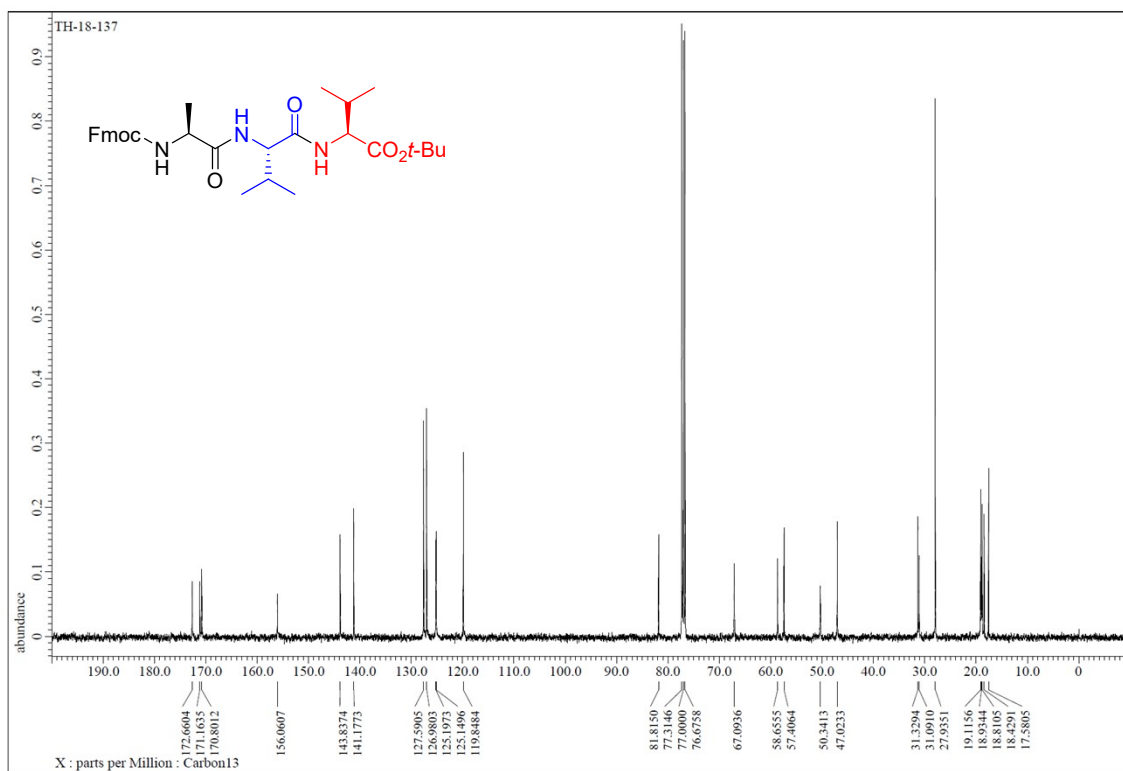

<sup>1</sup>H NMR (400 MHz, CDCl<sub>3</sub>) of **5c**

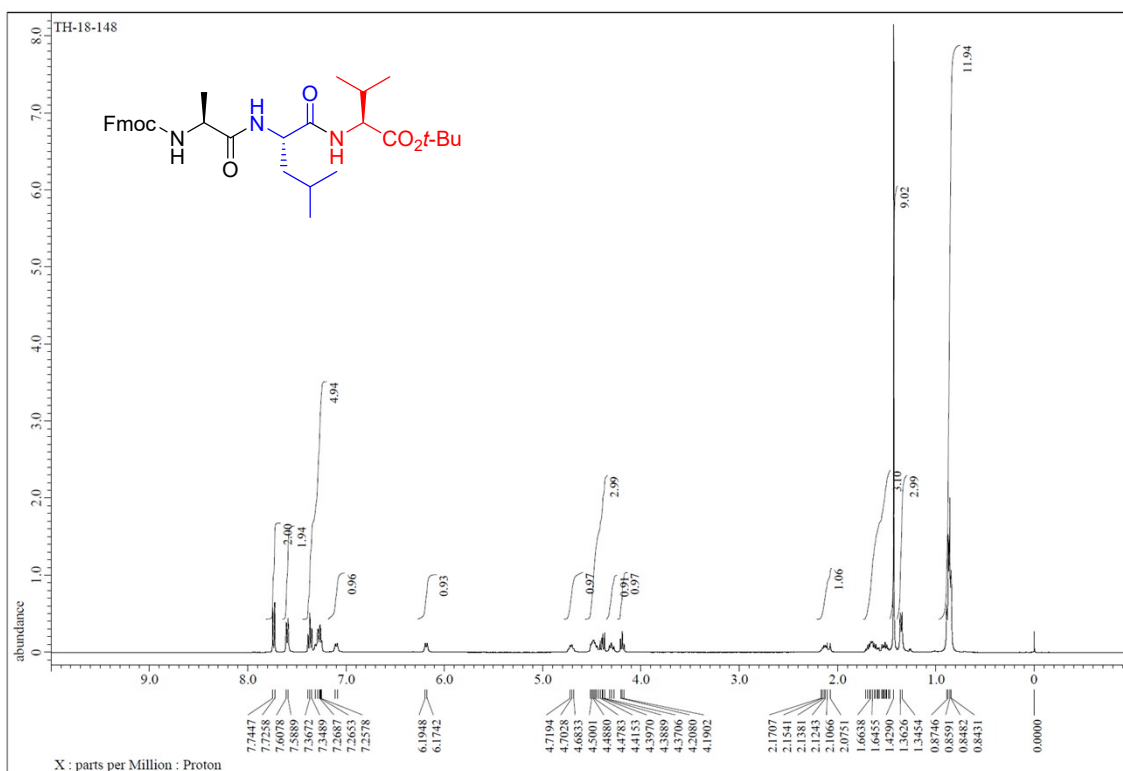

<sup>13</sup>C NMR (100 MHz, CDCl<sub>3</sub>) of **5c**

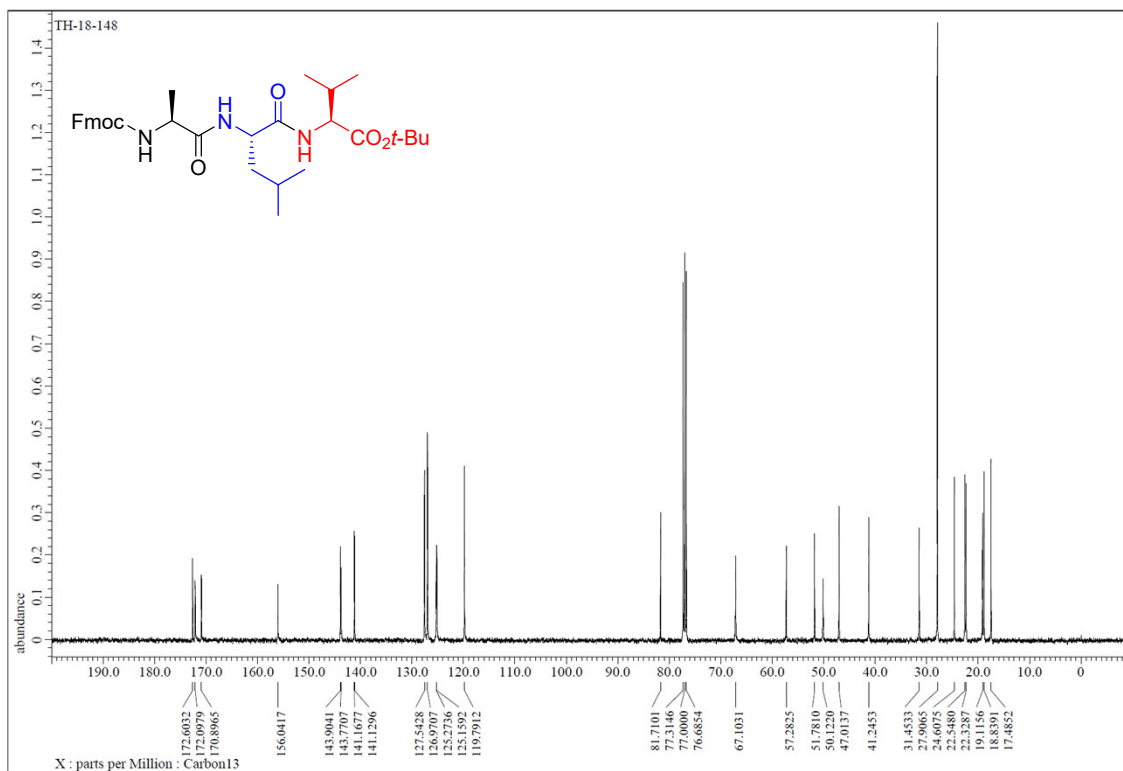

$^1\text{H}$  NMR (400 MHz,  $\text{CDCl}_3$ ) of **5d**

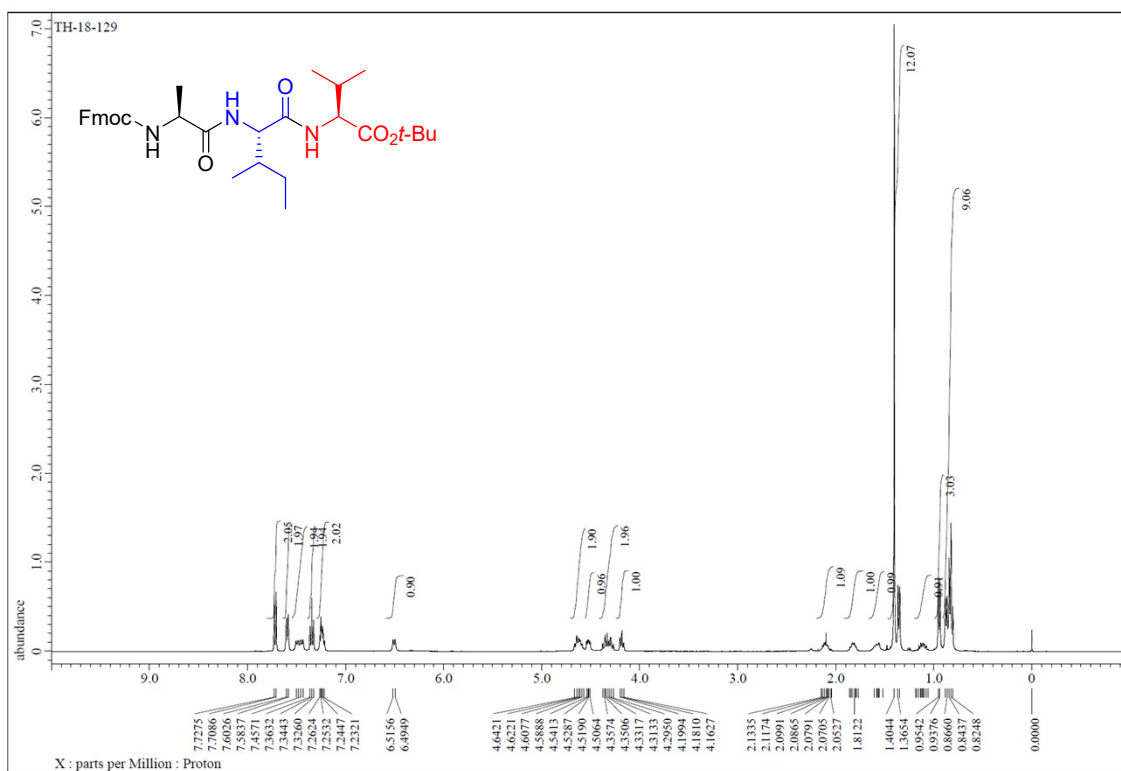

$^{13}\text{C}$  NMR (100 MHz,  $\text{CDCl}_3$ ) of **5d**

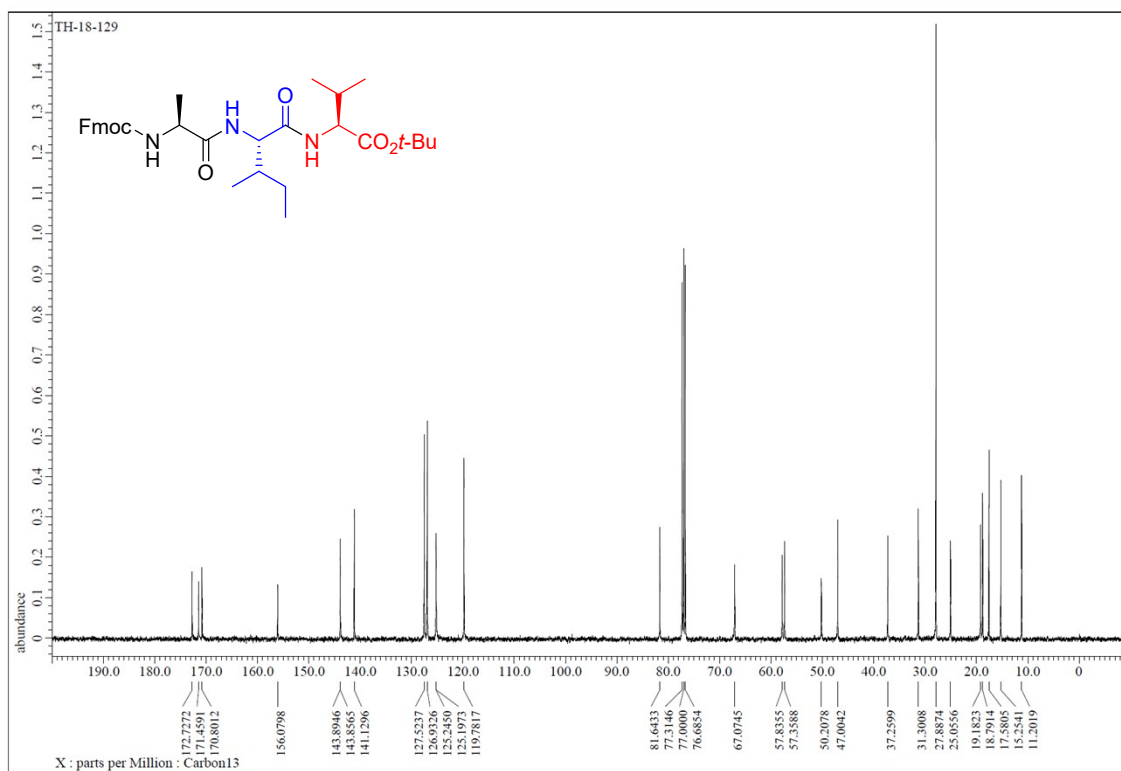

<sup>1</sup>H NMR (400 MHz, CDCl<sub>3</sub>) of **5e**

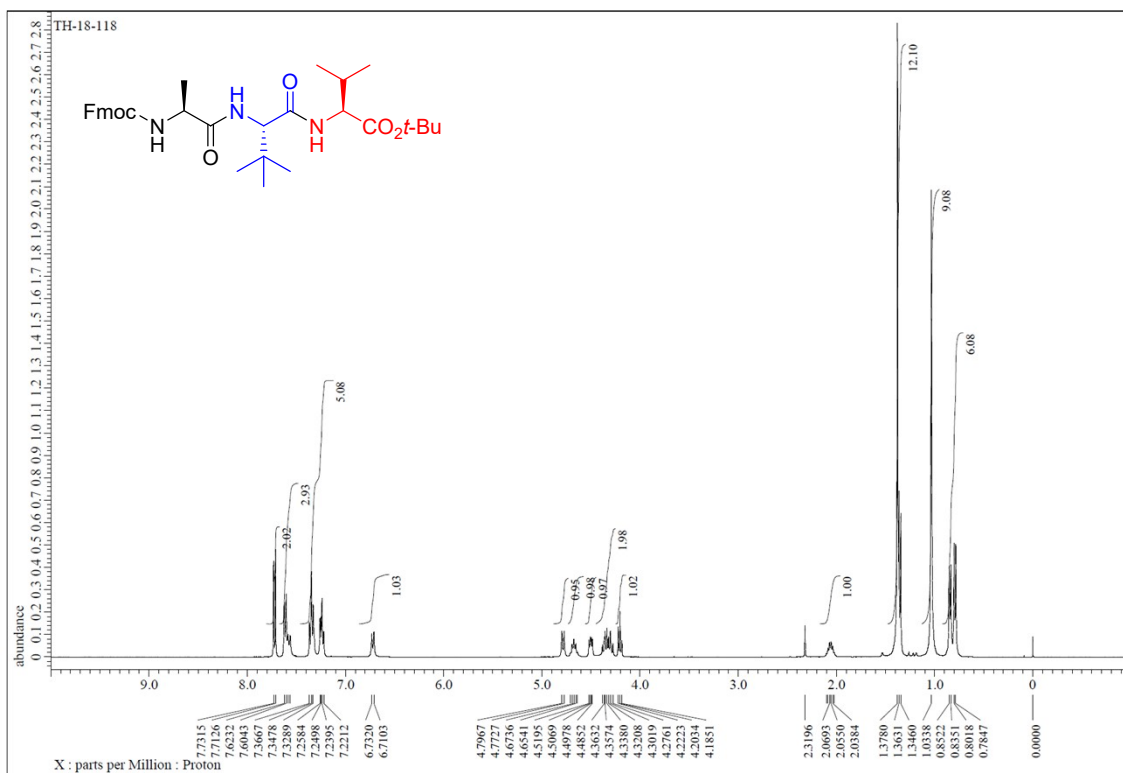

<sup>13</sup>C NMR (100 MHz, CDCl<sub>3</sub>) of **5e**

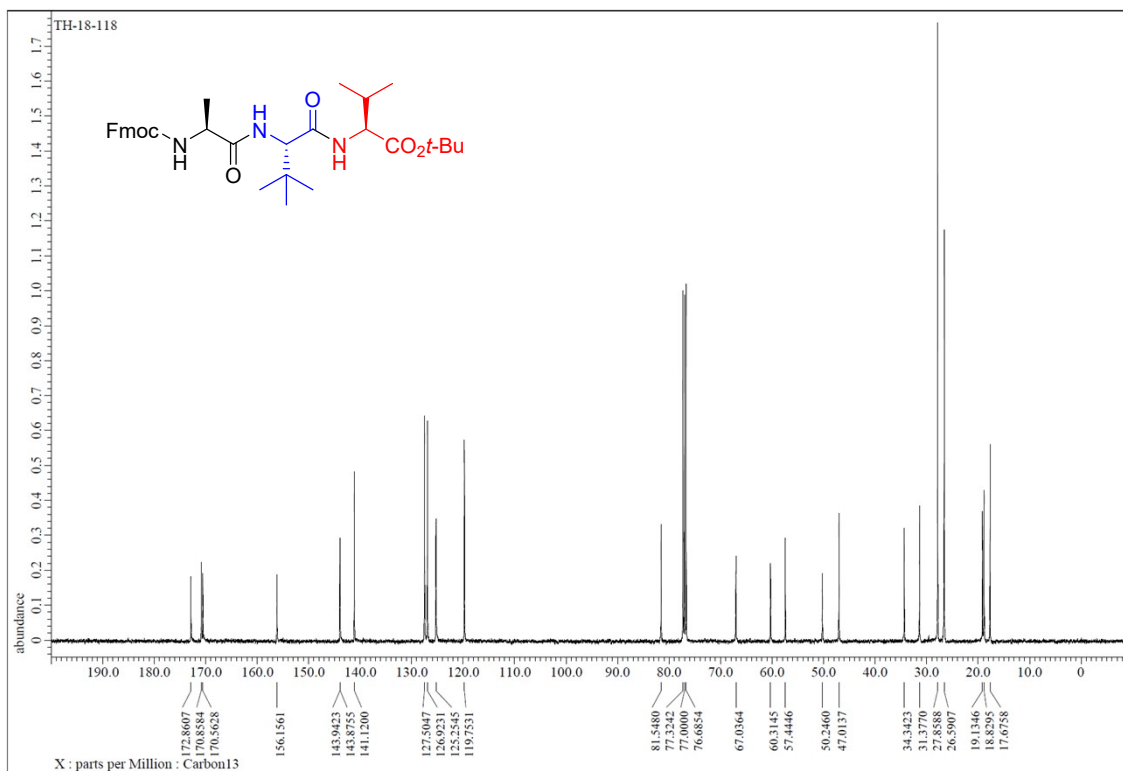

<sup>1</sup>H NMR (400 MHz, CDCl<sub>3</sub>) of **5f**

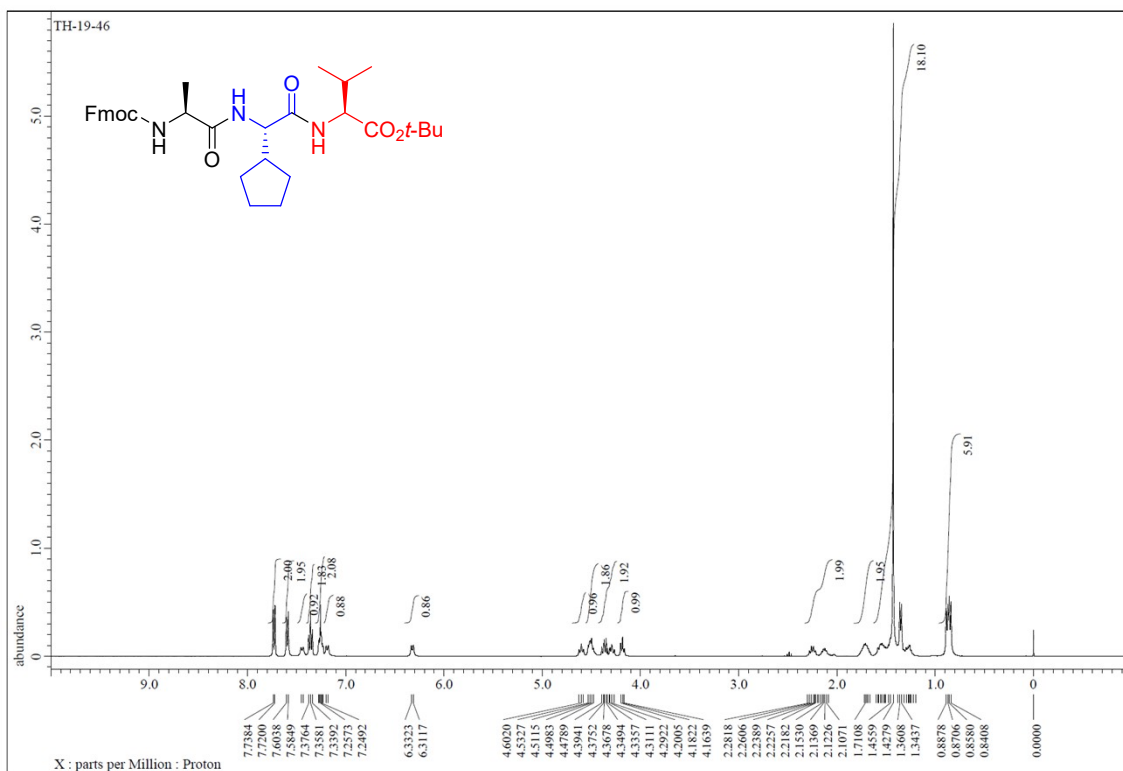

<sup>13</sup>C NMR (100 MHz, CDCl<sub>3</sub>) of **5f**

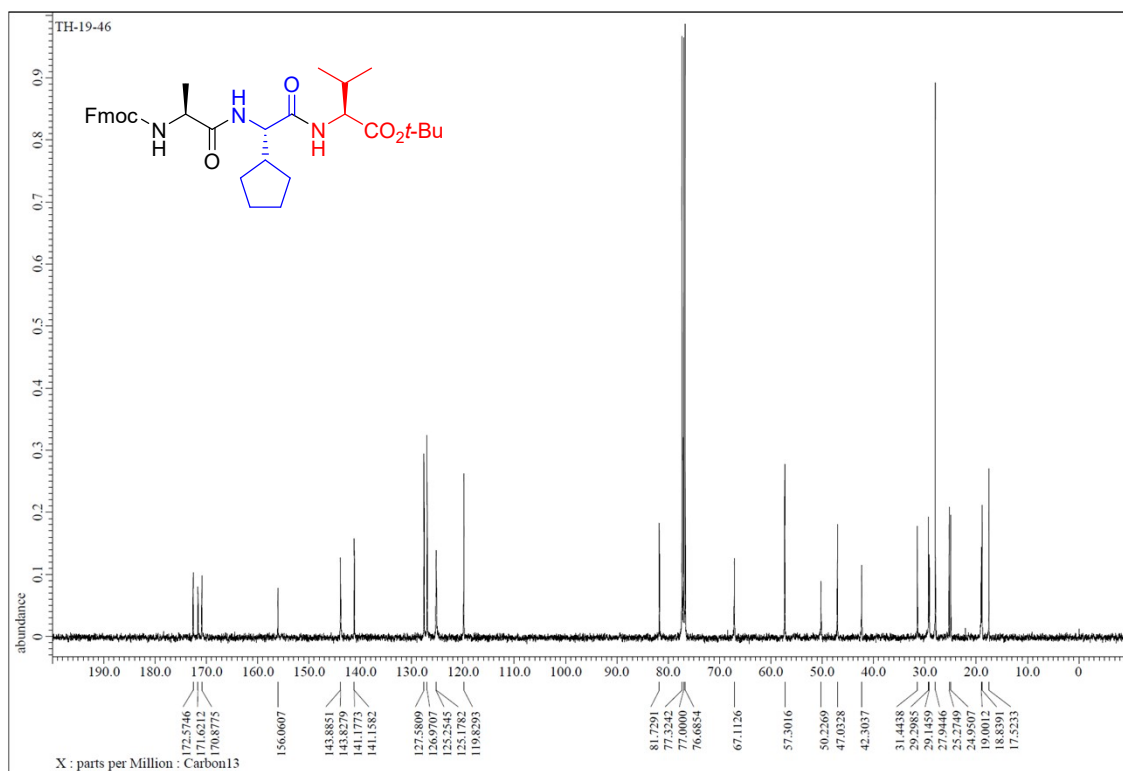

$^1\text{H}$  NMR (400 MHz,  $\text{CDCl}_3$ ) of **5g**

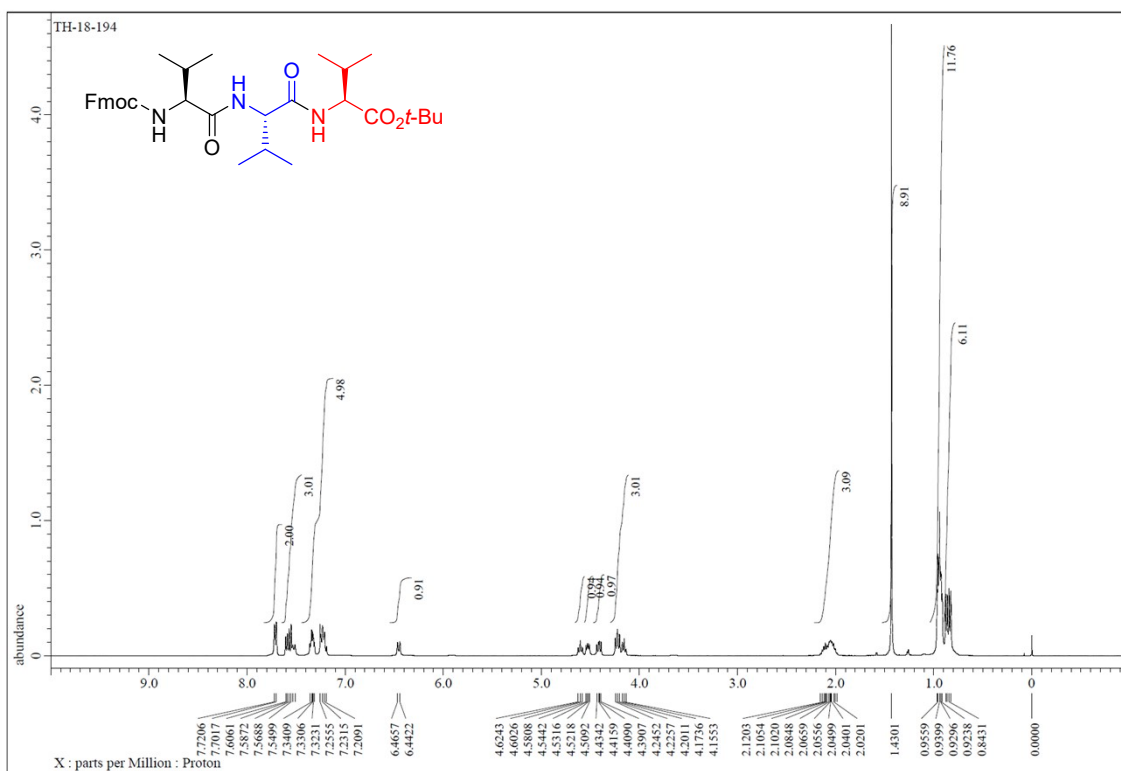

$^{13}\text{C}$  NMR (100 MHz,  $\text{CDCl}_3$ ) of **5g**

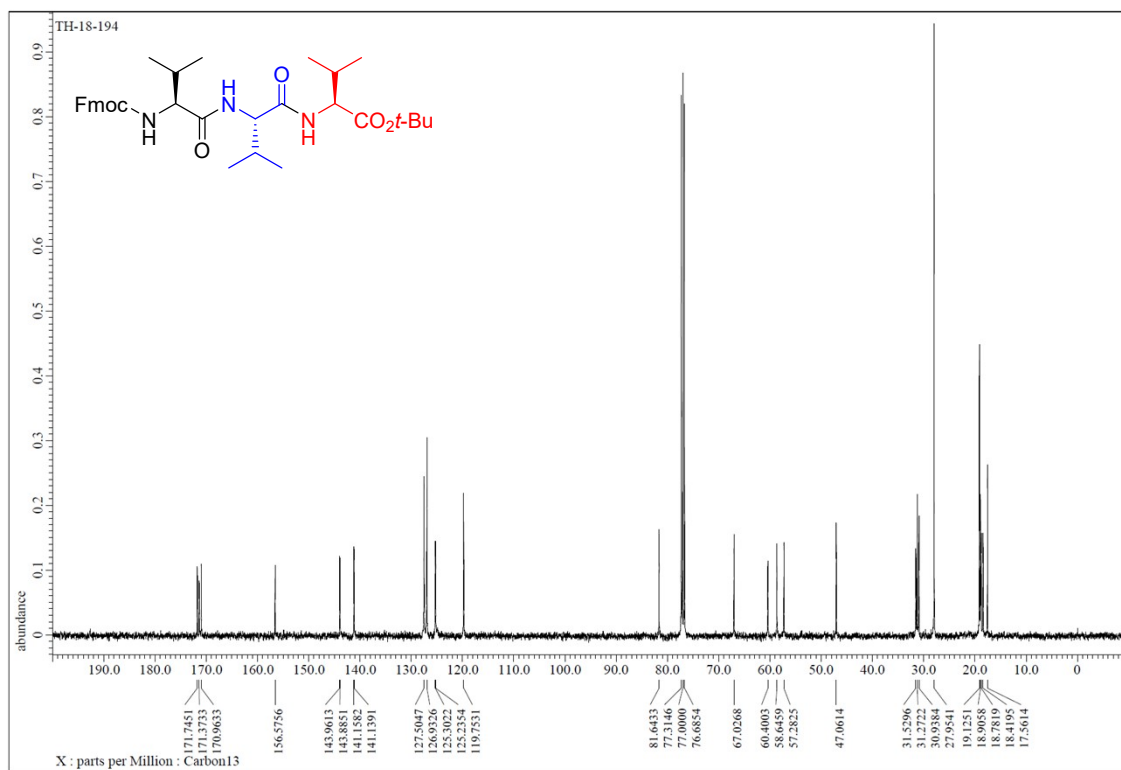

<sup>1</sup>H NMR (400 MHz, CDCl<sub>3</sub>) of **5h**

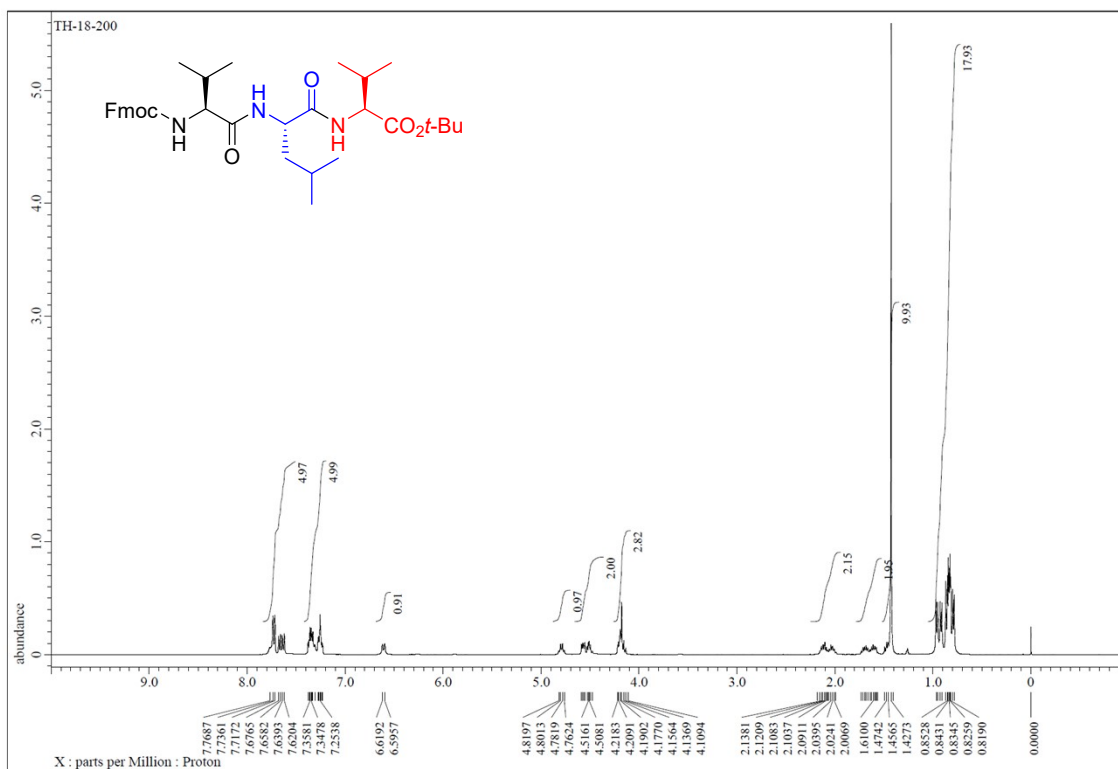

<sup>13</sup>C NMR (100 MHz, CDCl<sub>3</sub>) of **5h**

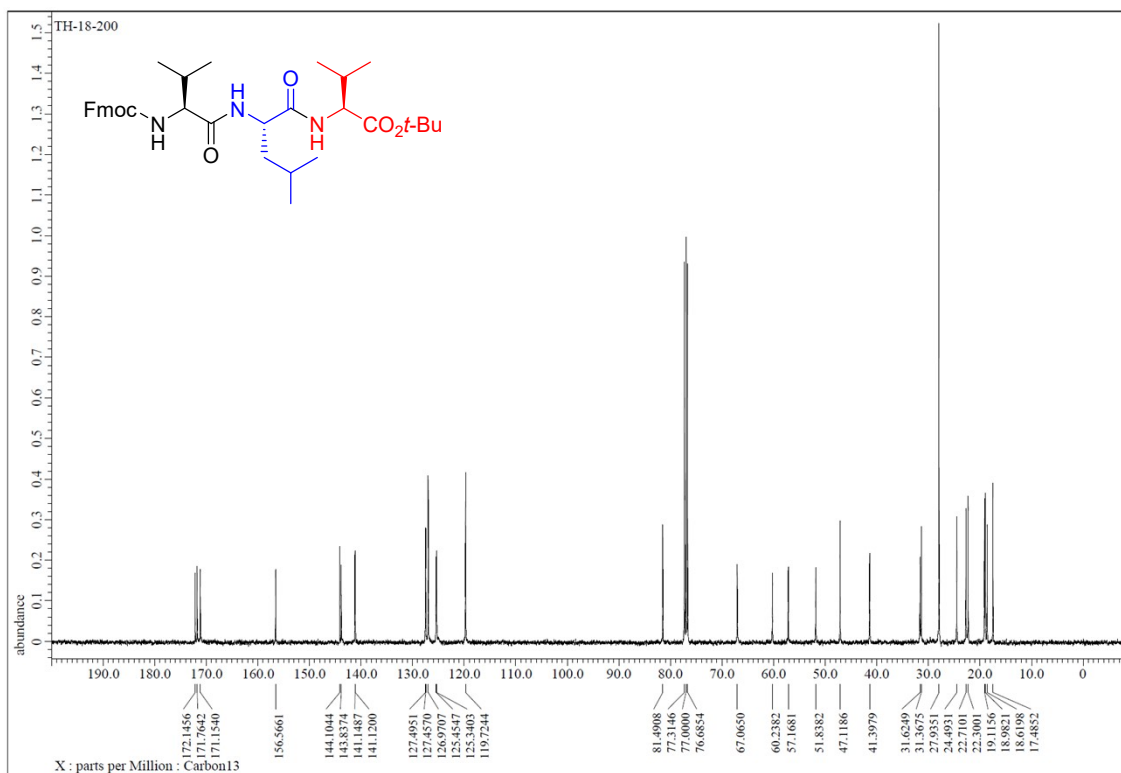

<sup>1</sup>H NMR (400 MHz, CDCl<sub>3</sub>) of **5i**

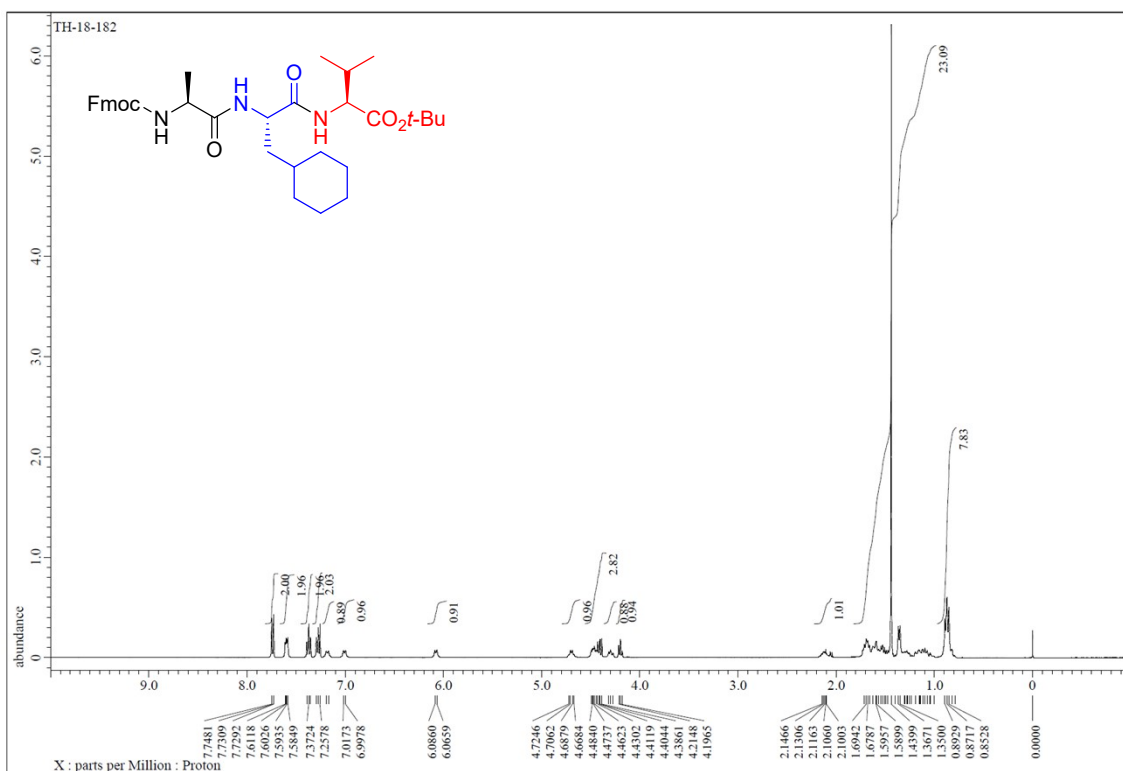

<sup>13</sup>C NMR (100 MHz, CDCl<sub>3</sub>) of **5i**

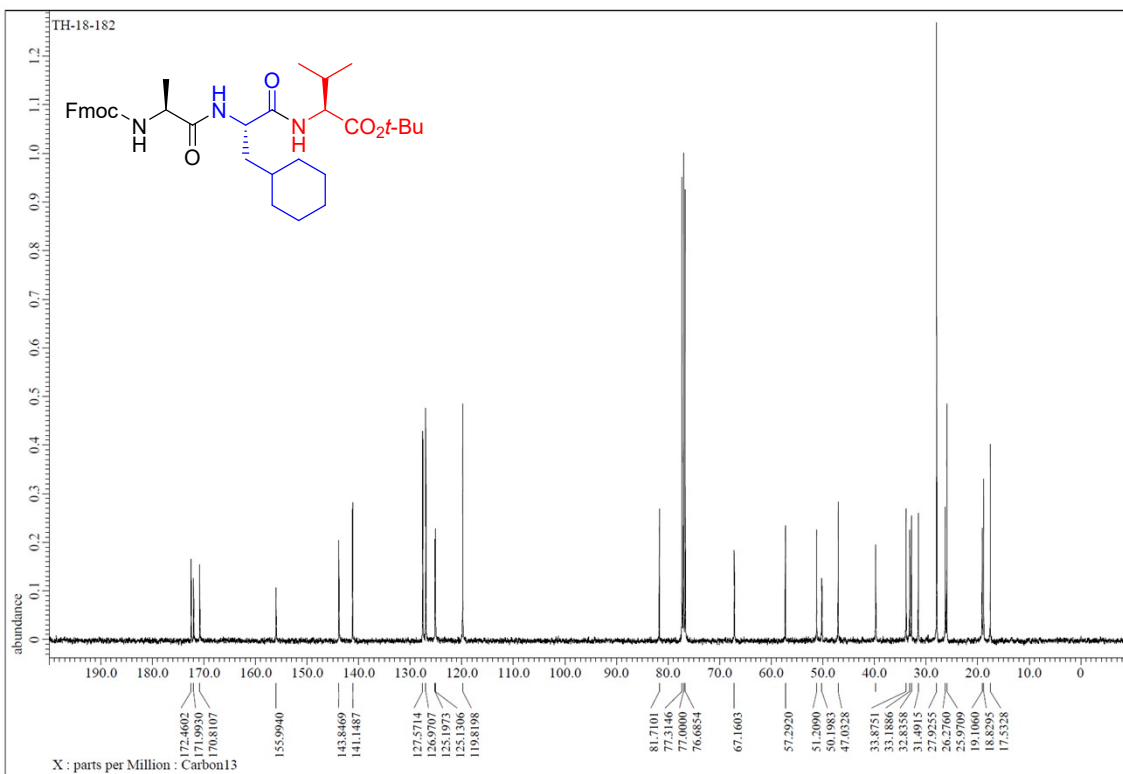



<sup>1</sup>H NMR (400 MHz, CDCl<sub>3</sub>) of **5j**

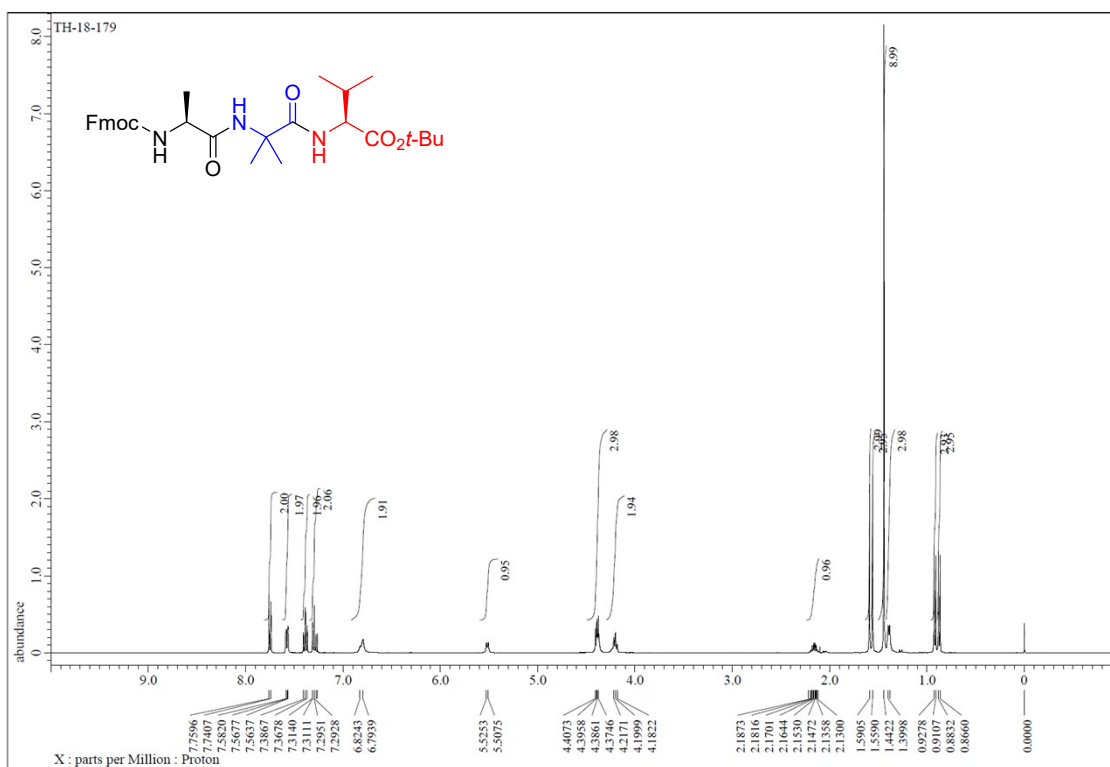

<sup>13</sup>C NMR (100 MHz, CDCl<sub>3</sub>) of **5j**

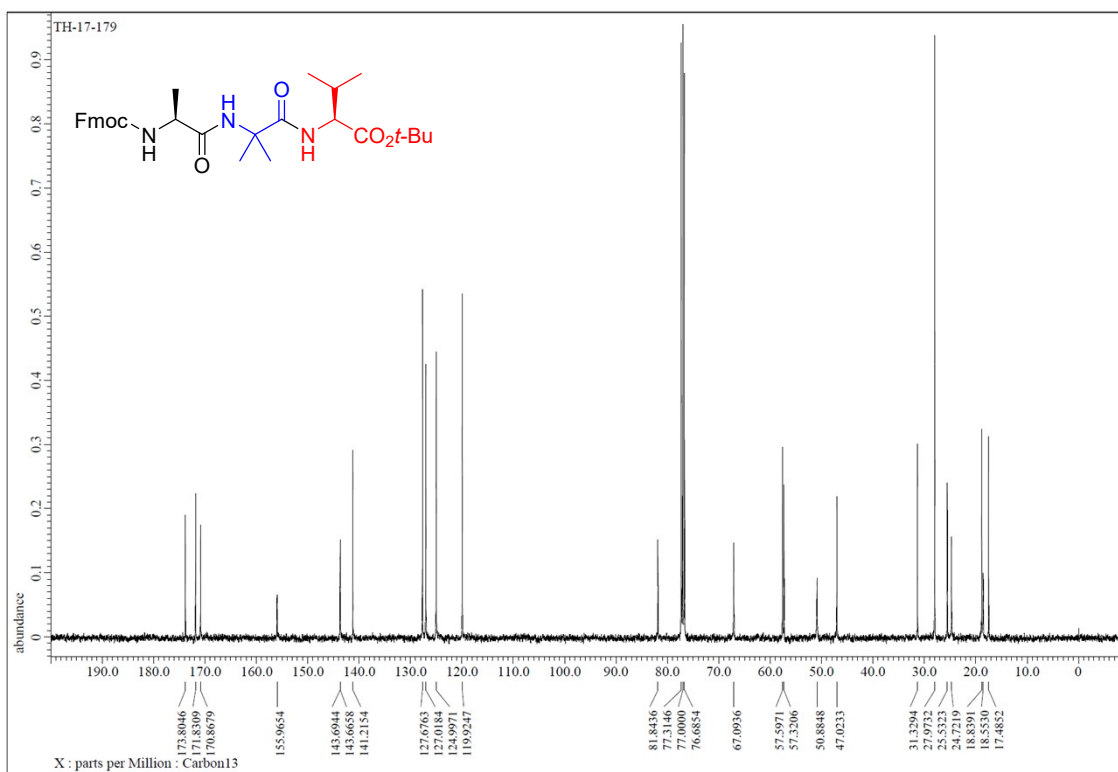

<sup>1</sup>H NMR (400 MHz, CDCl<sub>3</sub>) of **5k**

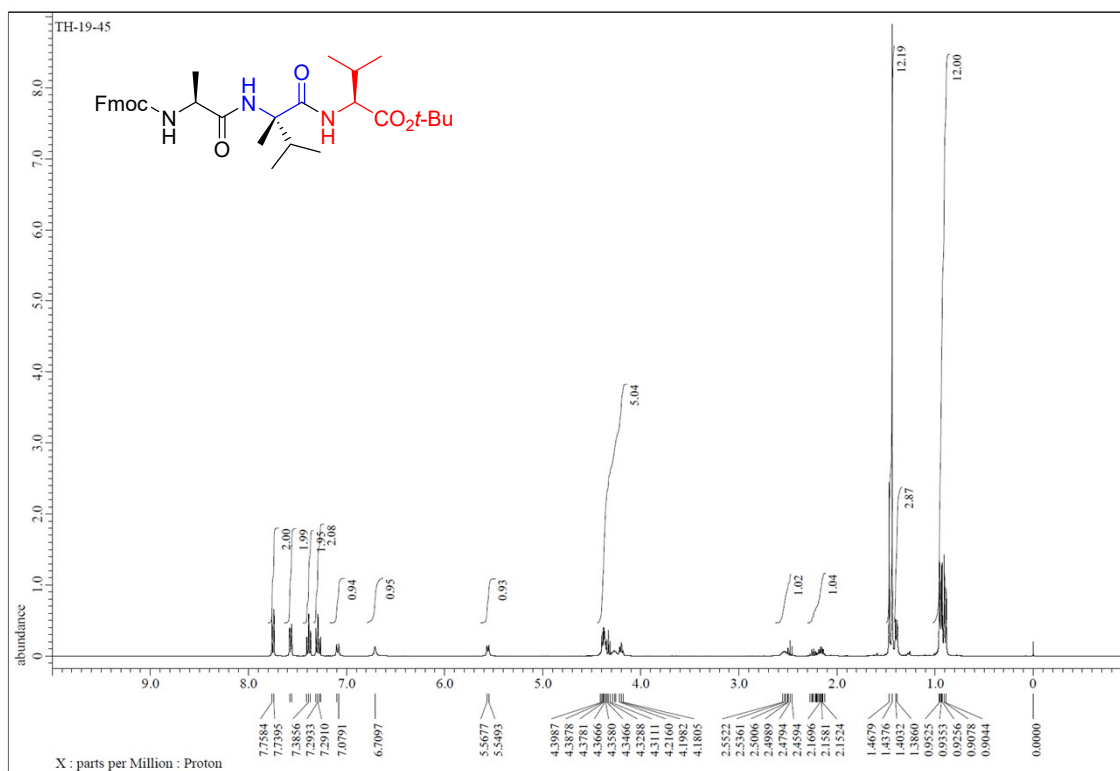

<sup>13</sup>C NMR (100 MHz, CDCl<sub>3</sub>) of **5k**

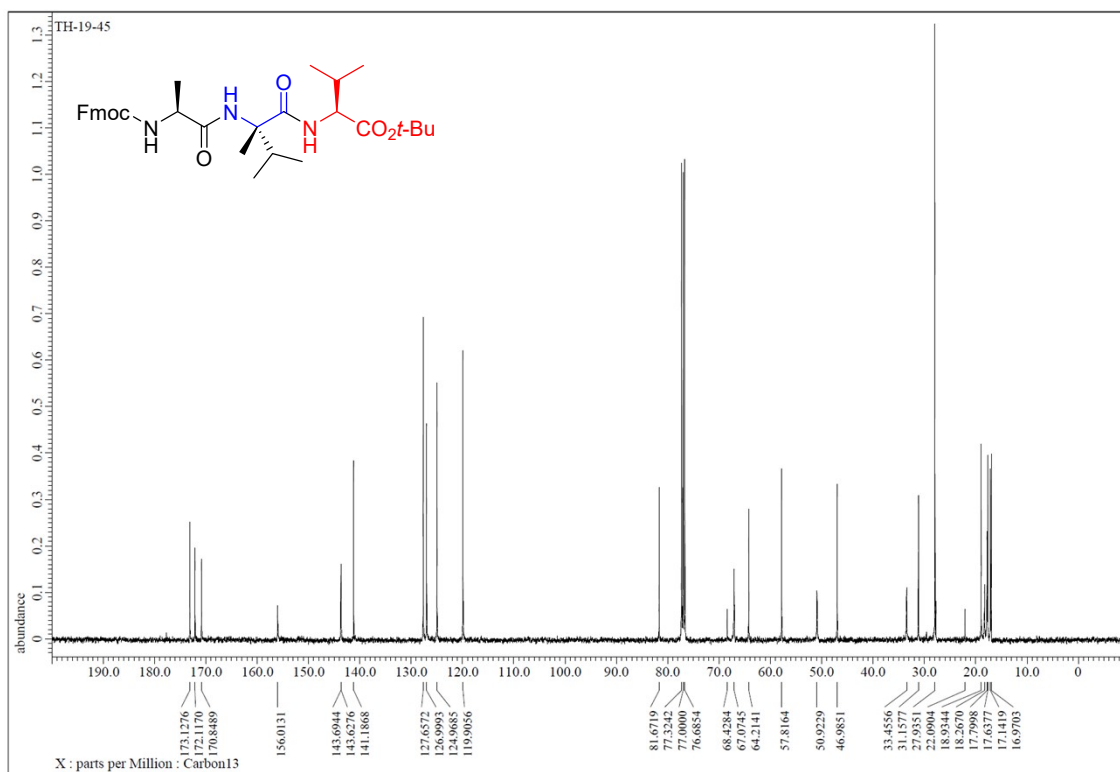

<sup>1</sup>H NMR (400 MHz, CDCl<sub>3</sub>) of **51**

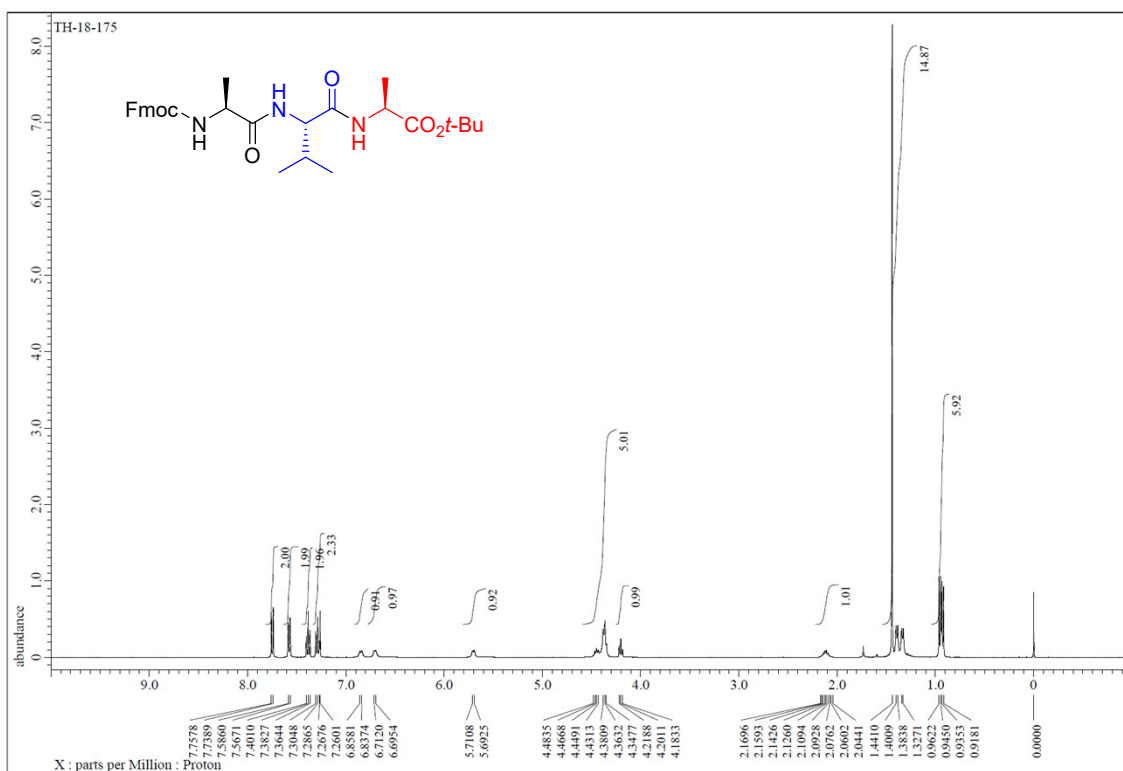

<sup>13</sup>C NMR (100 MHz, CDCl<sub>3</sub>) of **51**

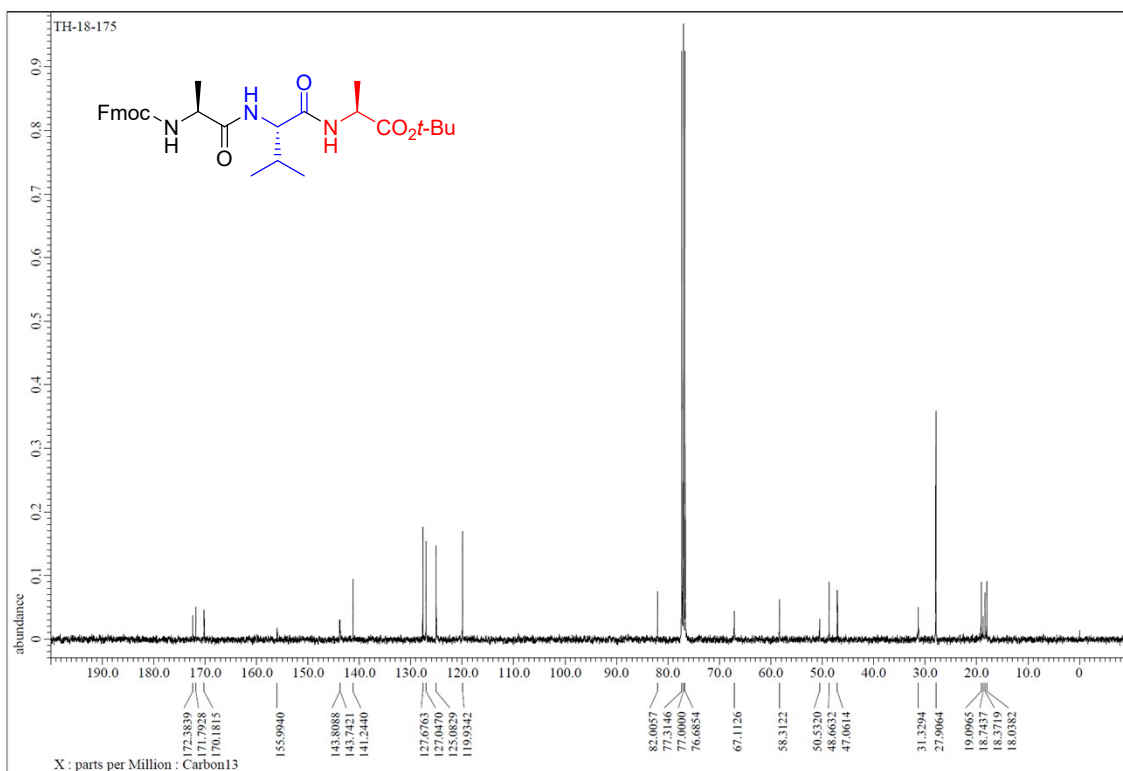

<sup>1</sup>H NMR (400 MHz, CDCl<sub>3</sub>) of **5m**

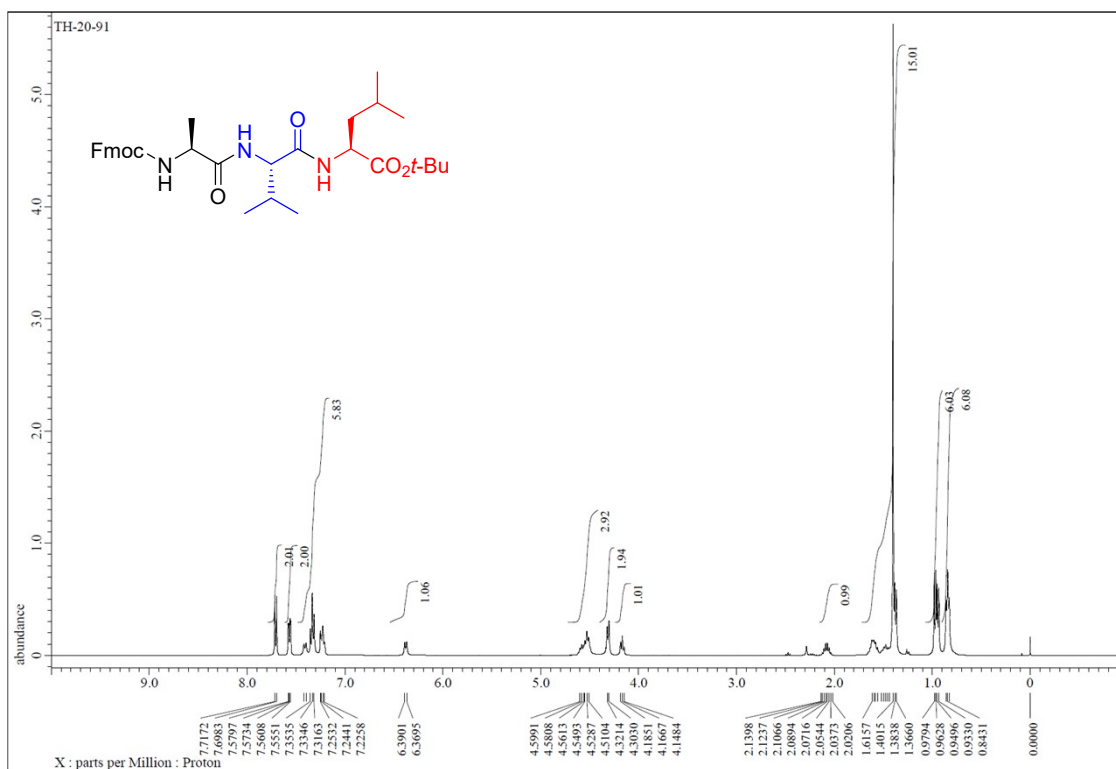

<sup>13</sup>C NMR (100 MHz, CDCl<sub>3</sub>) of **5m**

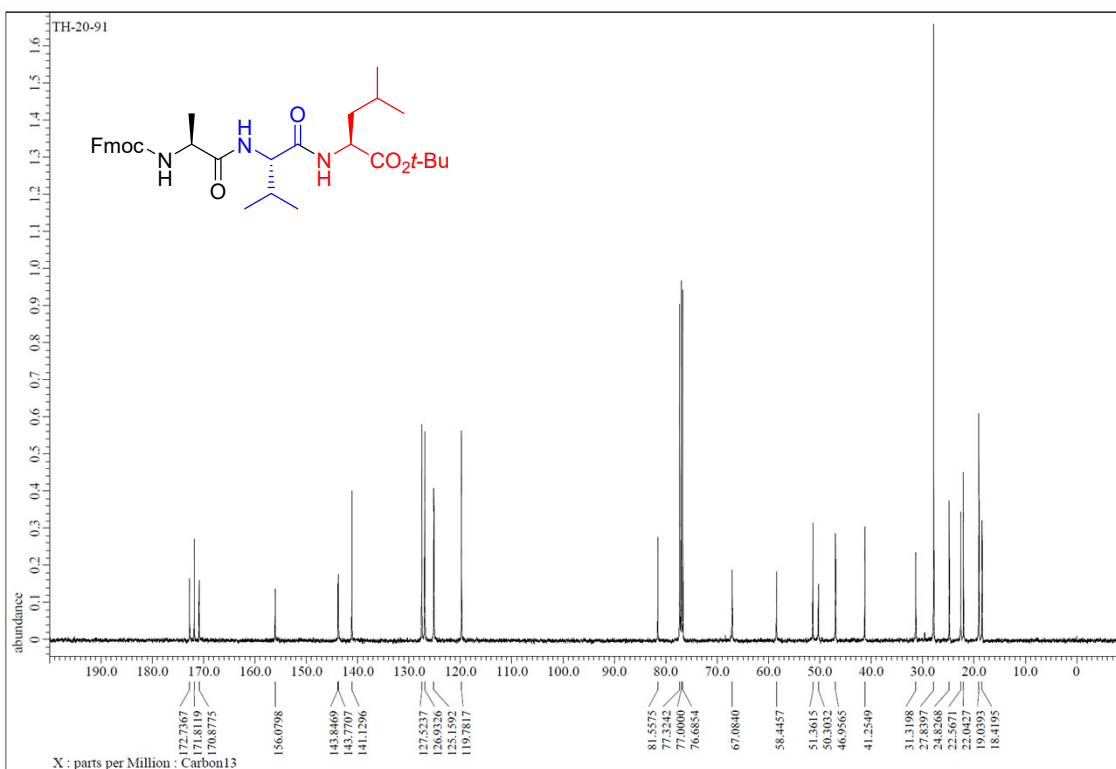

$^1\text{H}$  NMR (400 MHz,  $\text{CDCl}_3$ ) of **5n**

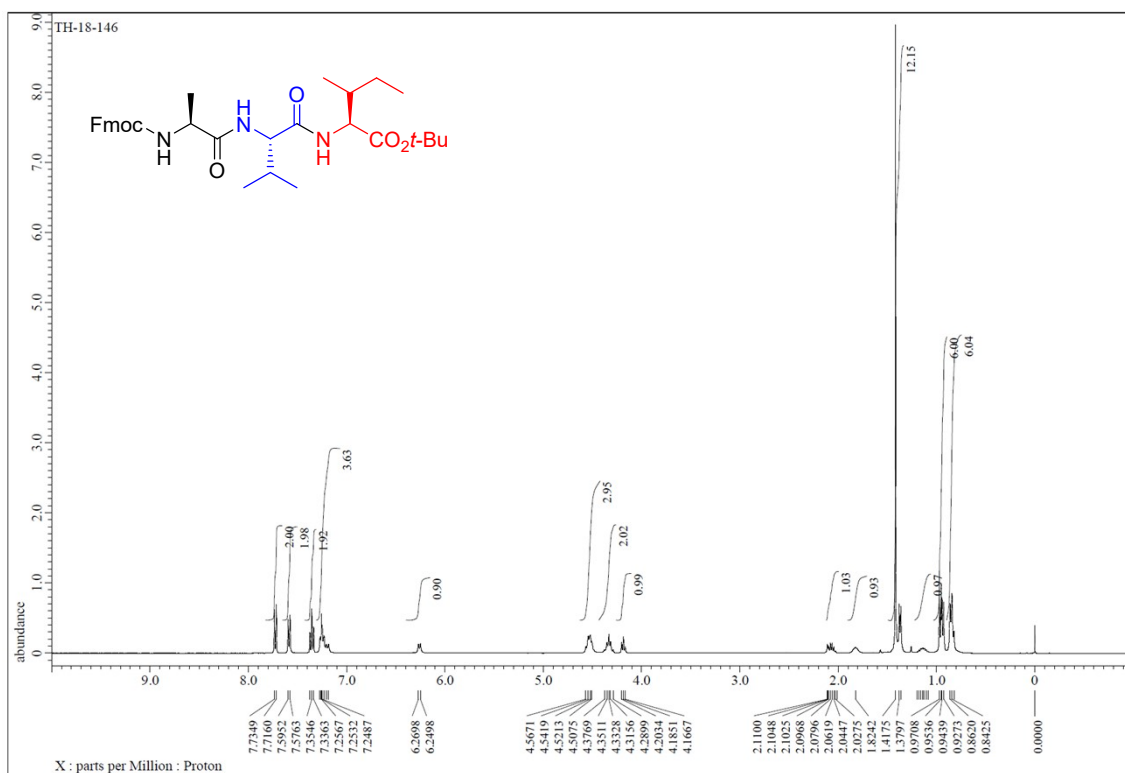

$^{13}\text{C}$  NMR (100 MHz,  $\text{CDCl}_3$ ) of **5n**

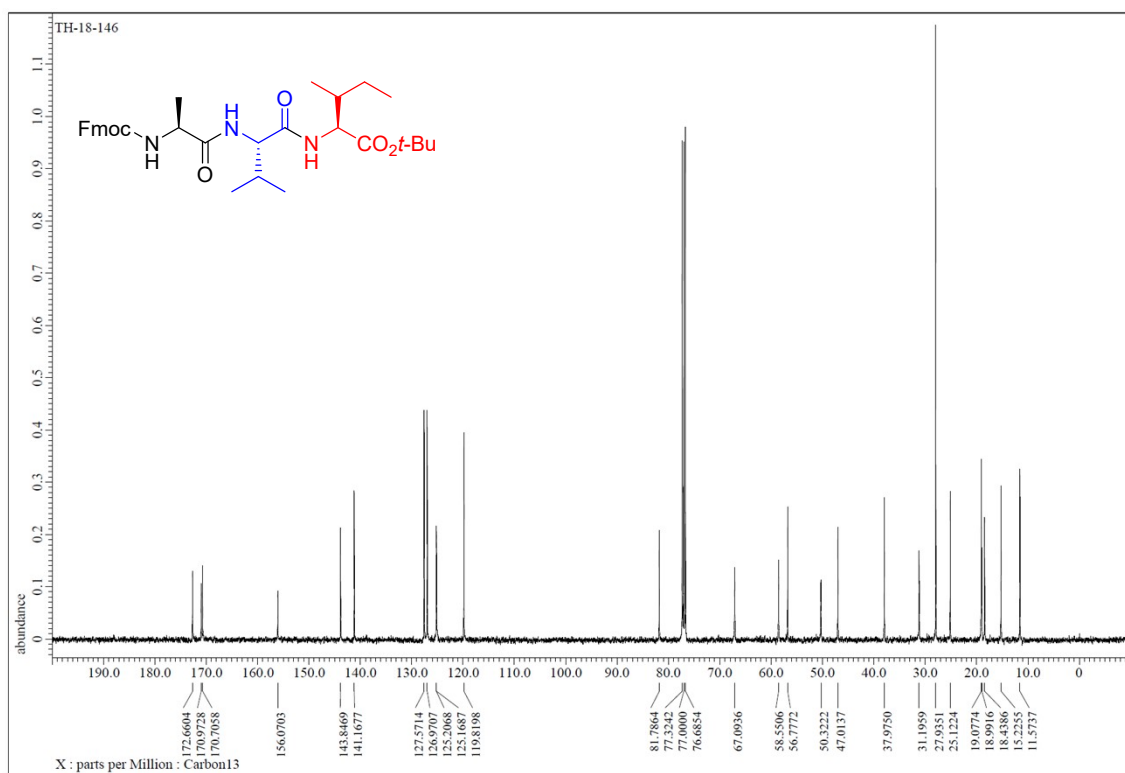

<sup>1</sup>H NMR (400 MHz, CDCl<sub>3</sub>) of **5o**

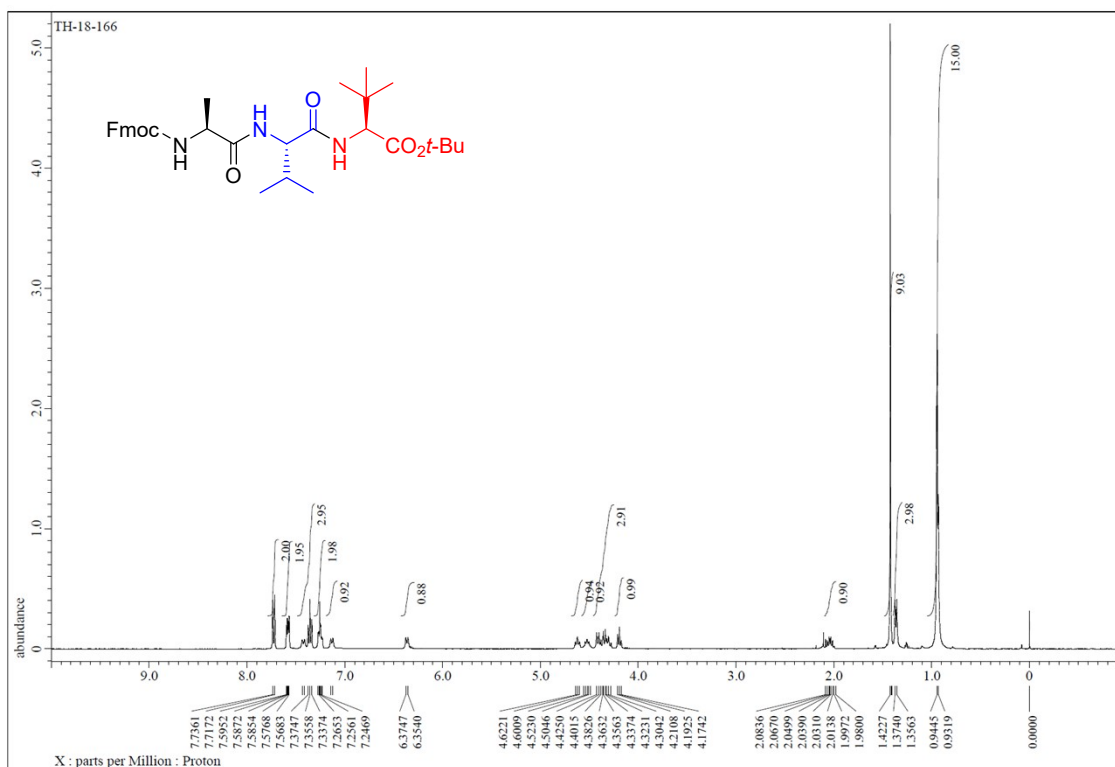

<sup>13</sup>C NMR (100 MHz, CDCl<sub>3</sub>) of **5o**

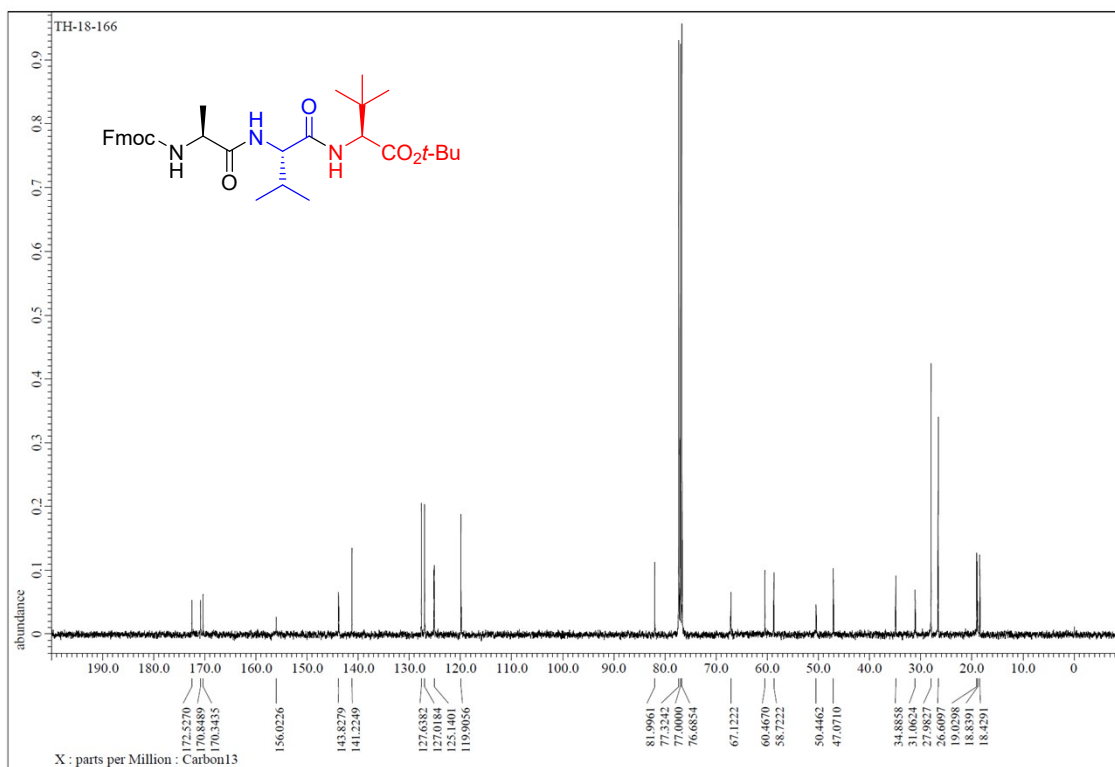

<sup>1</sup>H NMR (400 MHz, CDCl<sub>3</sub>) of **5p**

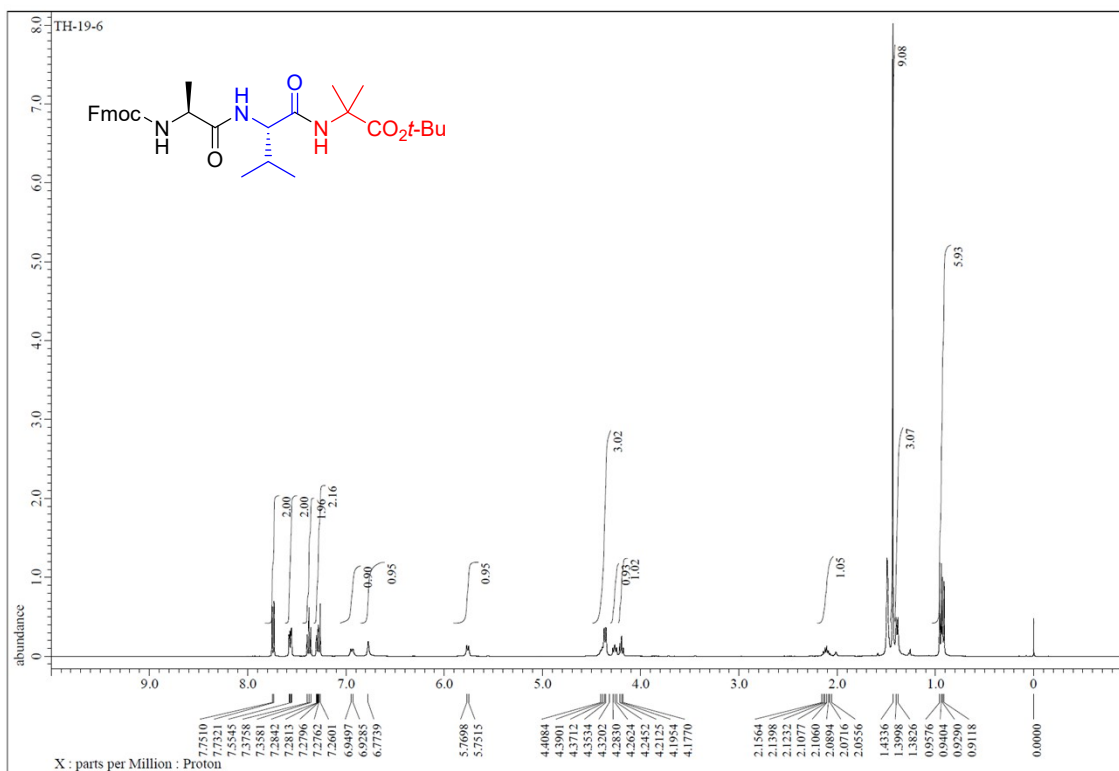

<sup>13</sup>C NMR (100 MHz, CDCl<sub>3</sub>) of **5p**

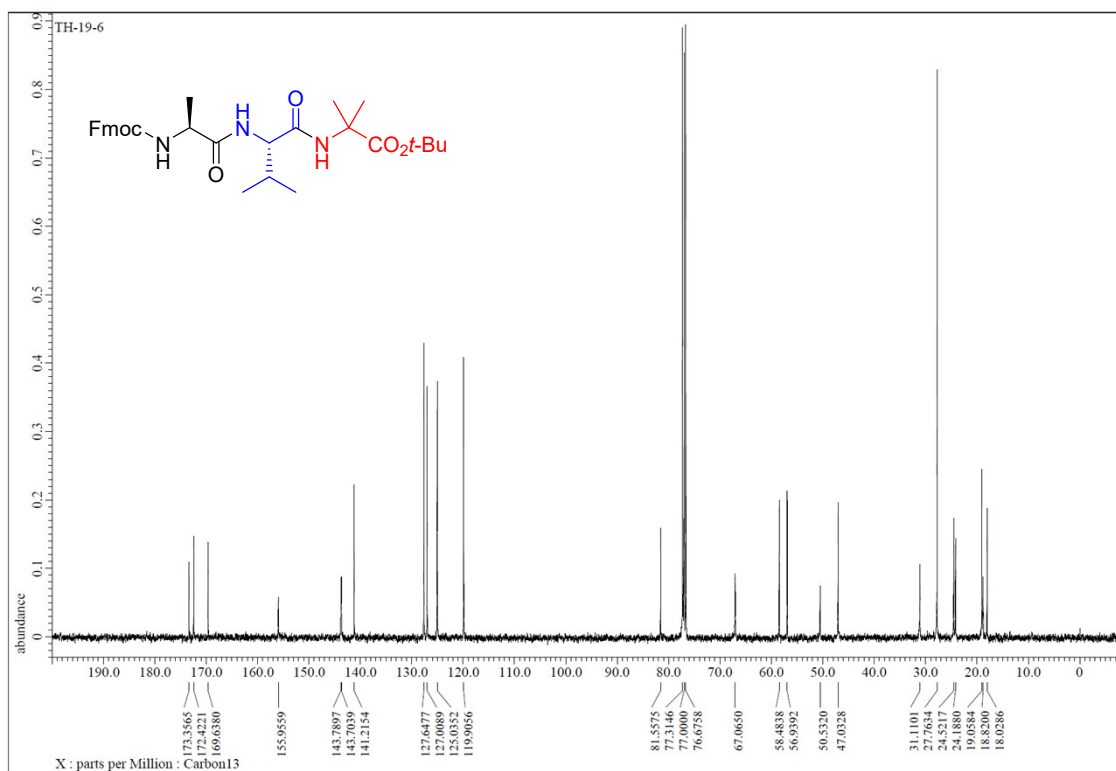

<sup>1</sup>H NMR (400 MHz, CDCl<sub>3</sub>) of **5q**

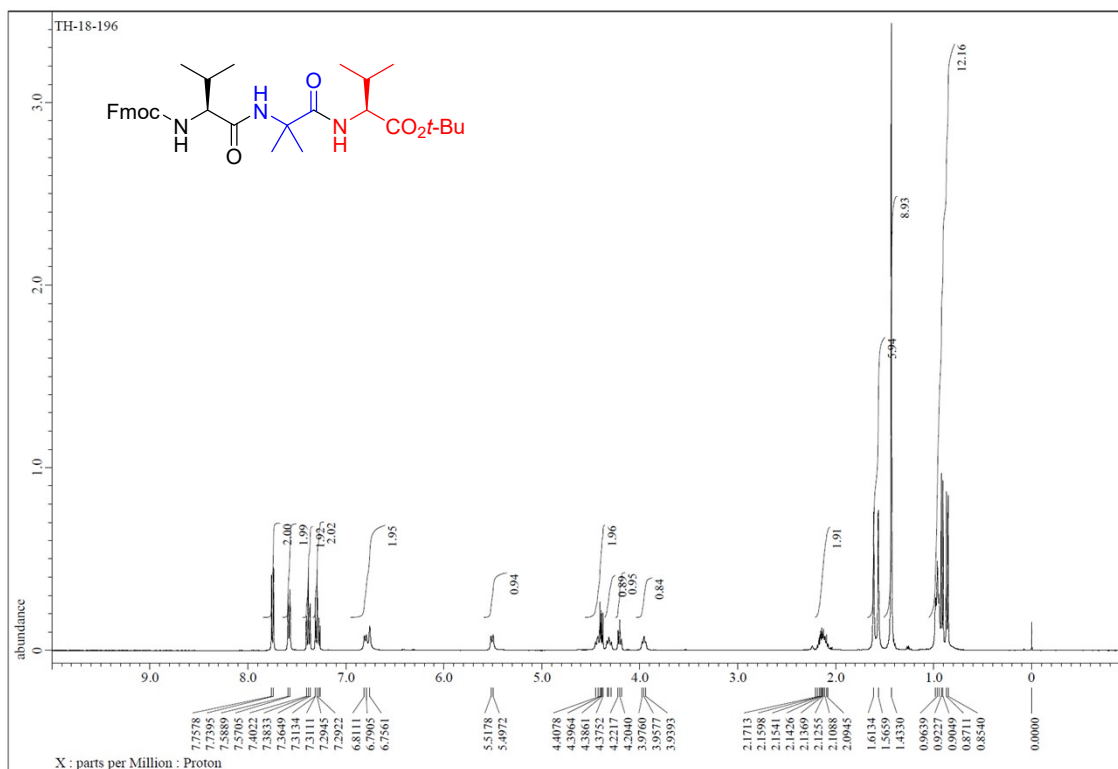

<sup>13</sup>C NMR (100 MHz, CDCl<sub>3</sub>) of **5q**

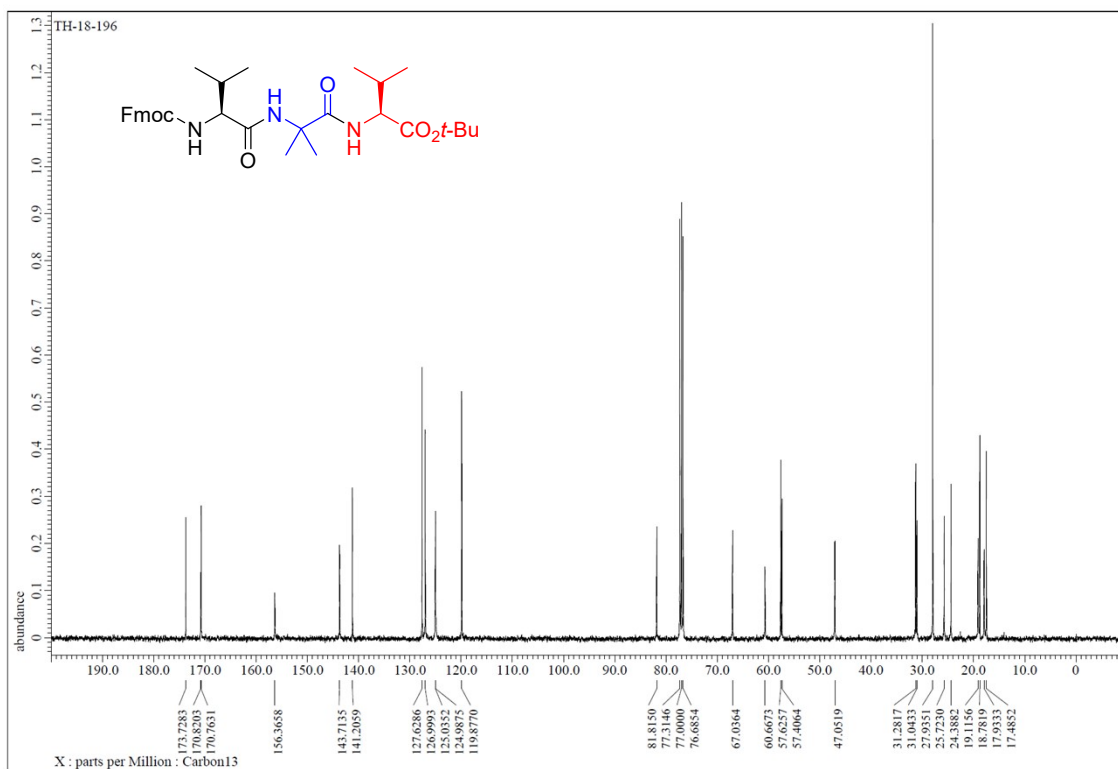



$^1\text{H}$  NMR (400 MHz,  $\text{CDCl}_3$ ) of **5r**

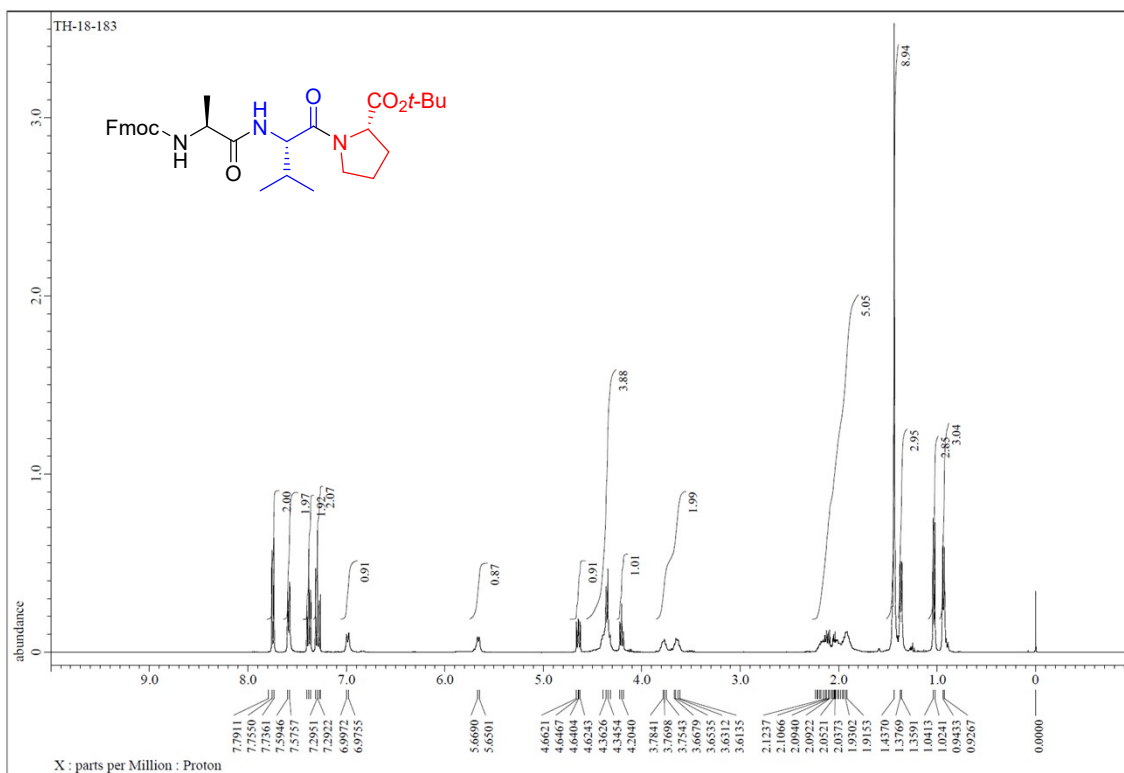

$^{13}\text{C}$  NMR (100 MHz,  $\text{CDCl}_3$ ) of **5r**

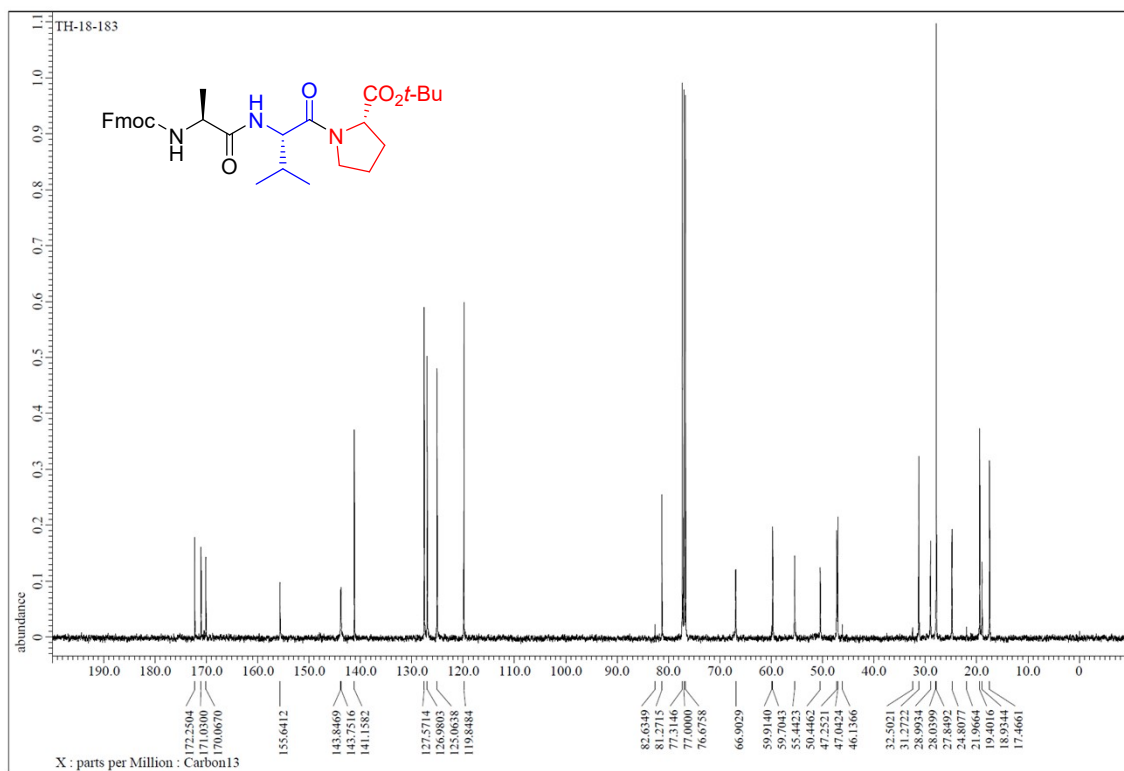

<sup>1</sup>H NMR (400 MHz, CDCl<sub>3</sub>) of **5s**

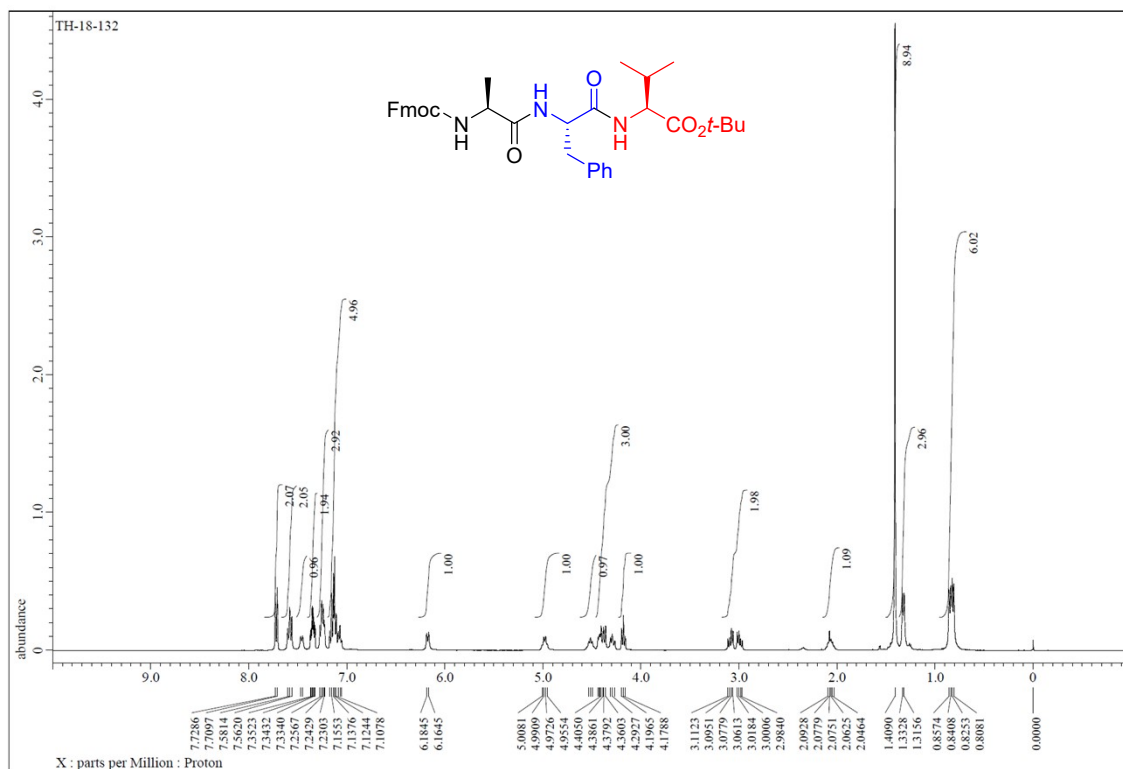

<sup>13</sup>C NMR (100 MHz, CDCl<sub>3</sub>) of **5s**

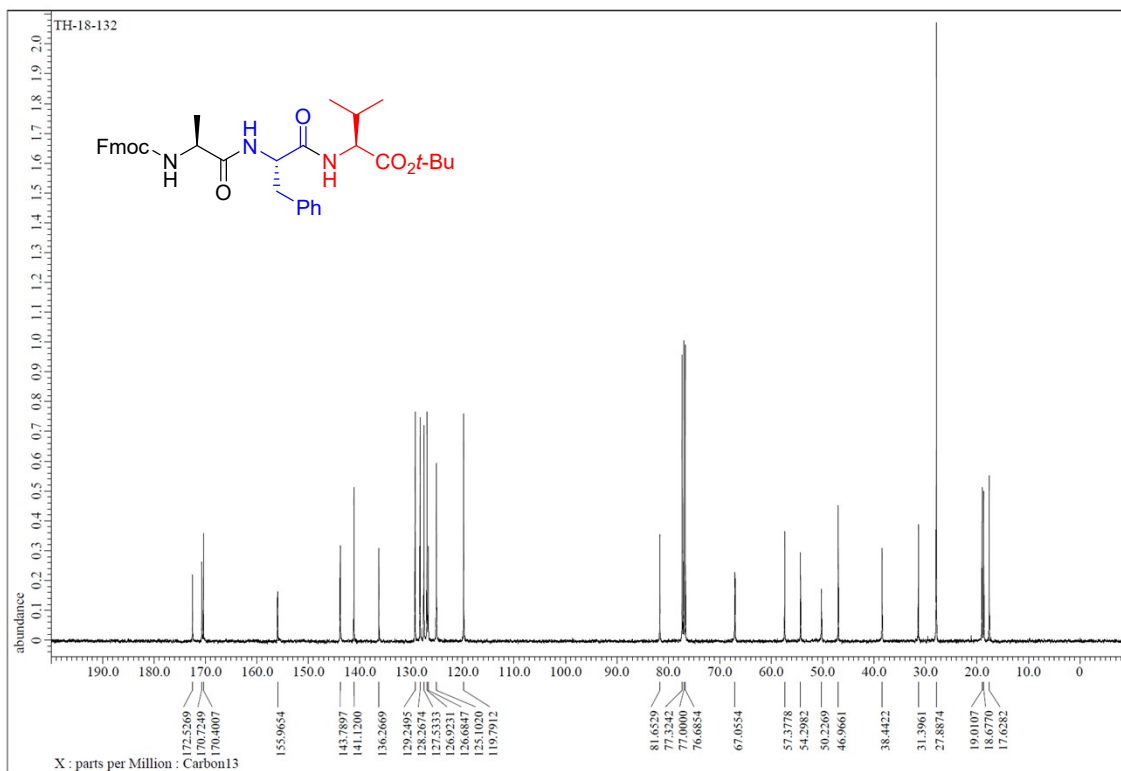

$^1\text{H}$  NMR (400 MHz,  $\text{CDCl}_3$ ) of **5t**

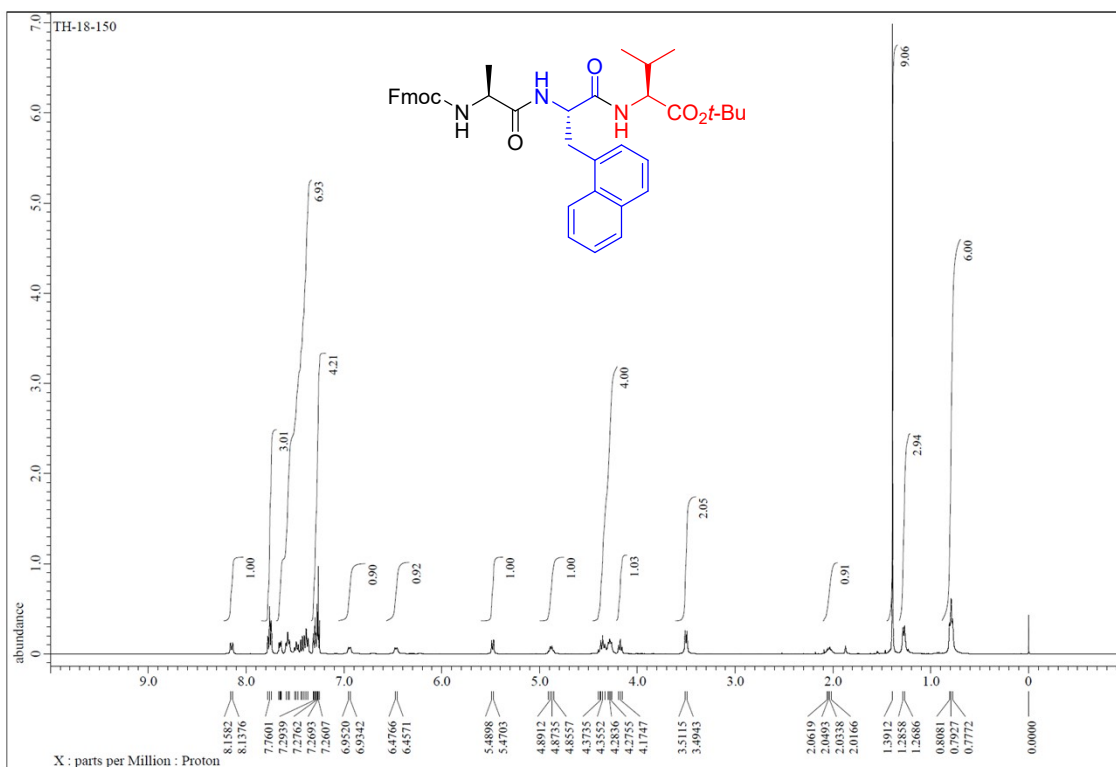

$^{13}\text{C}$  NMR (100 MHz,  $\text{CDCl}_3$ ) of **5t**

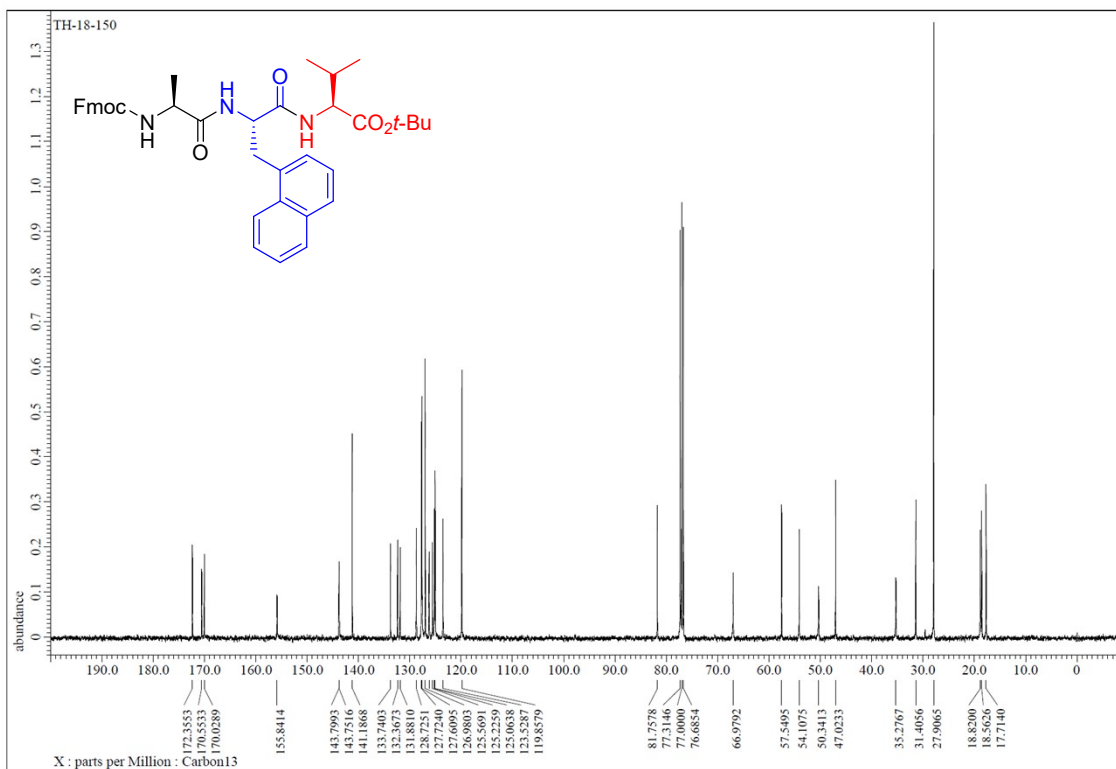

<sup>1</sup>H NMR (400 MHz, CDCl<sub>3</sub>) of **5u**

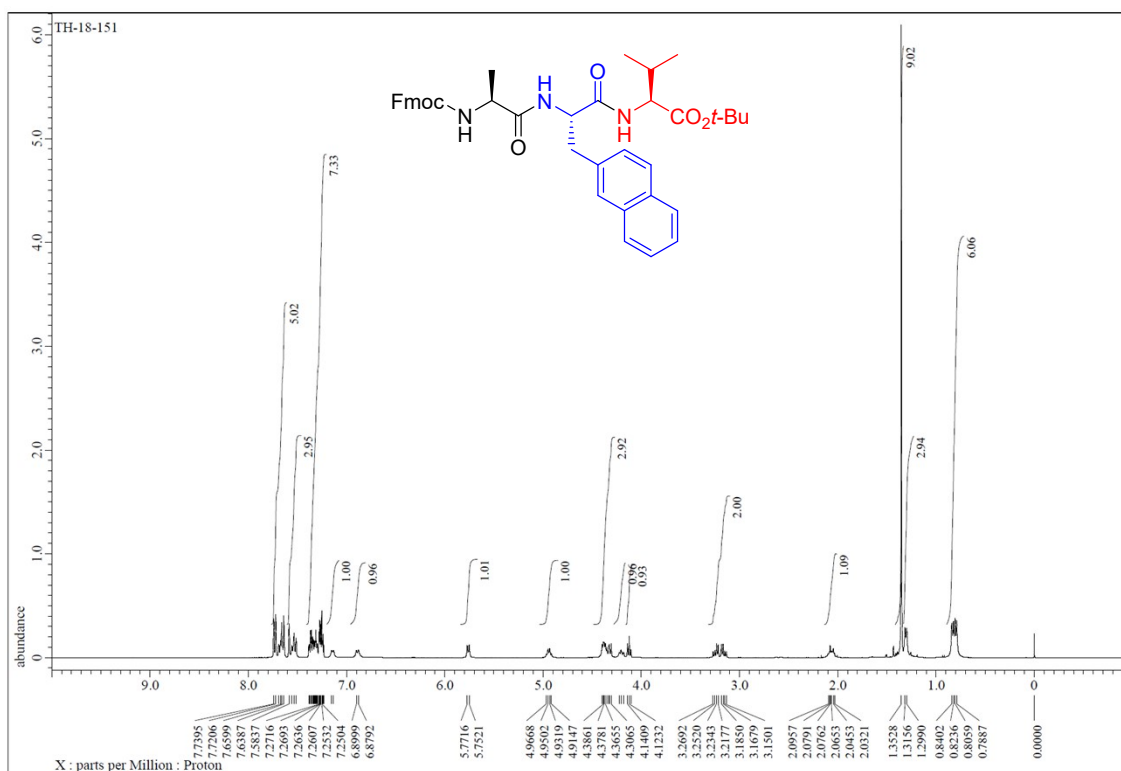

<sup>13</sup>C NMR (100 MHz, CDCl<sub>3</sub>) of **5u**

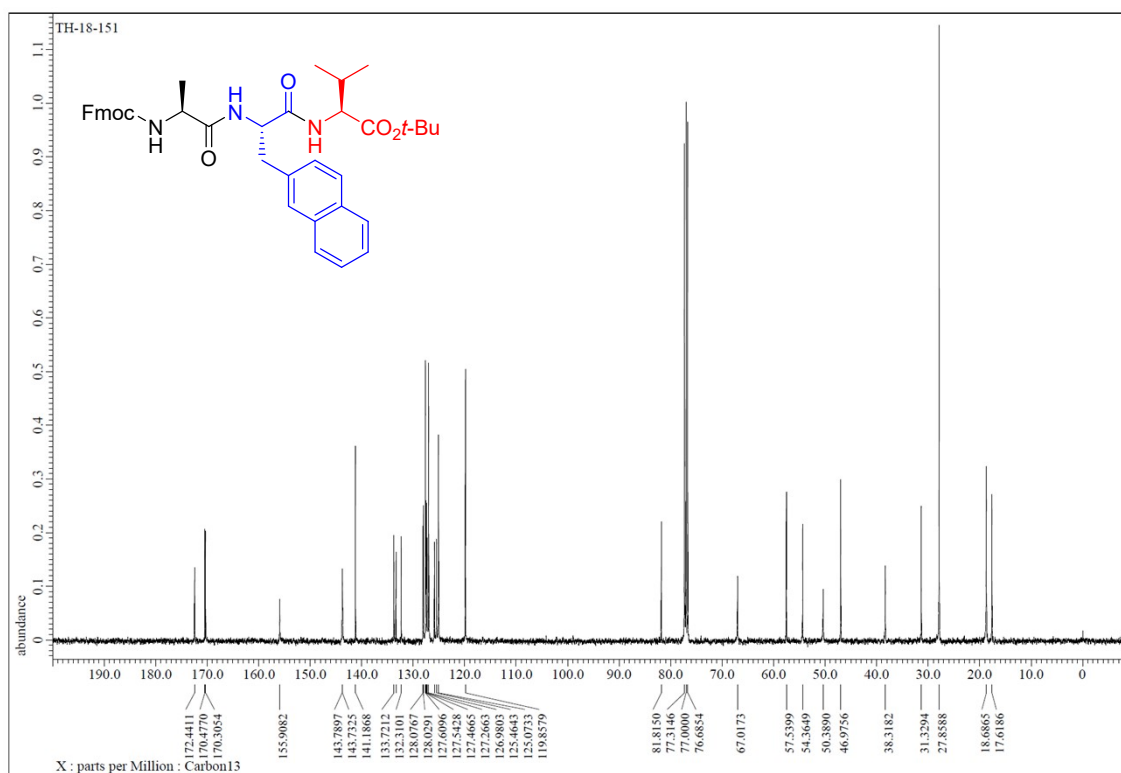

<sup>1</sup>H NMR (400 MHz, CDCl<sub>3</sub>) of **5v**

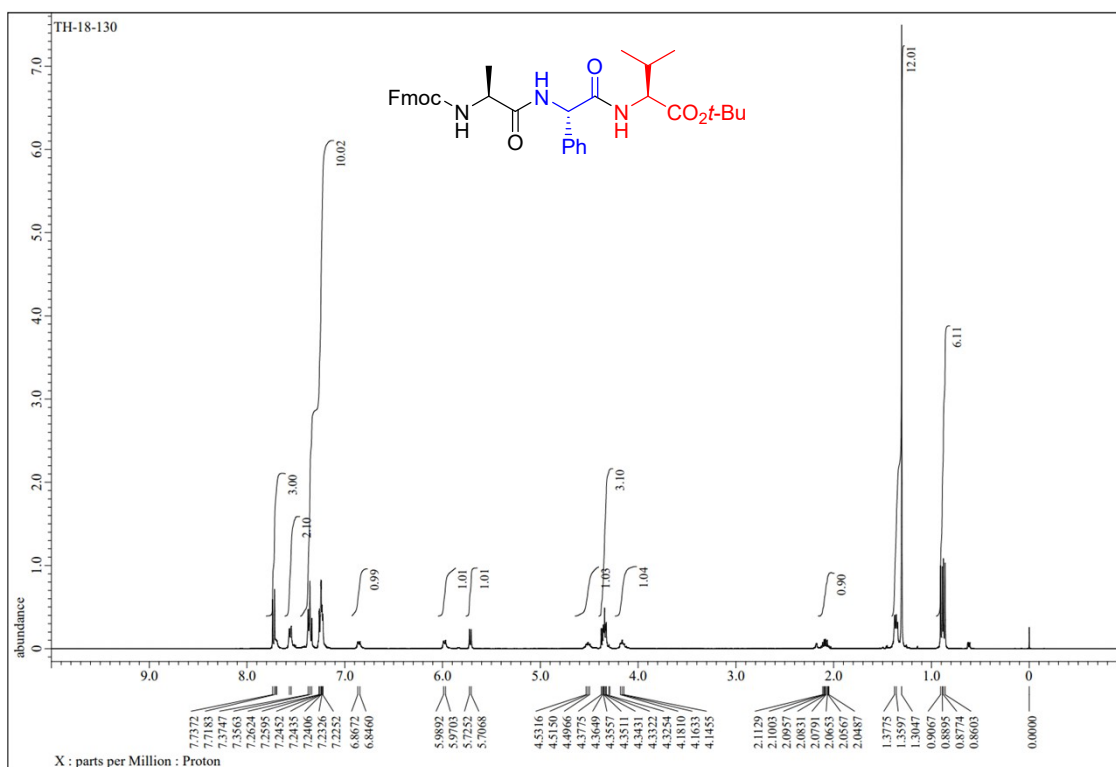

<sup>13</sup>C NMR (100 MHz, CDCl<sub>3</sub>) of **5v**

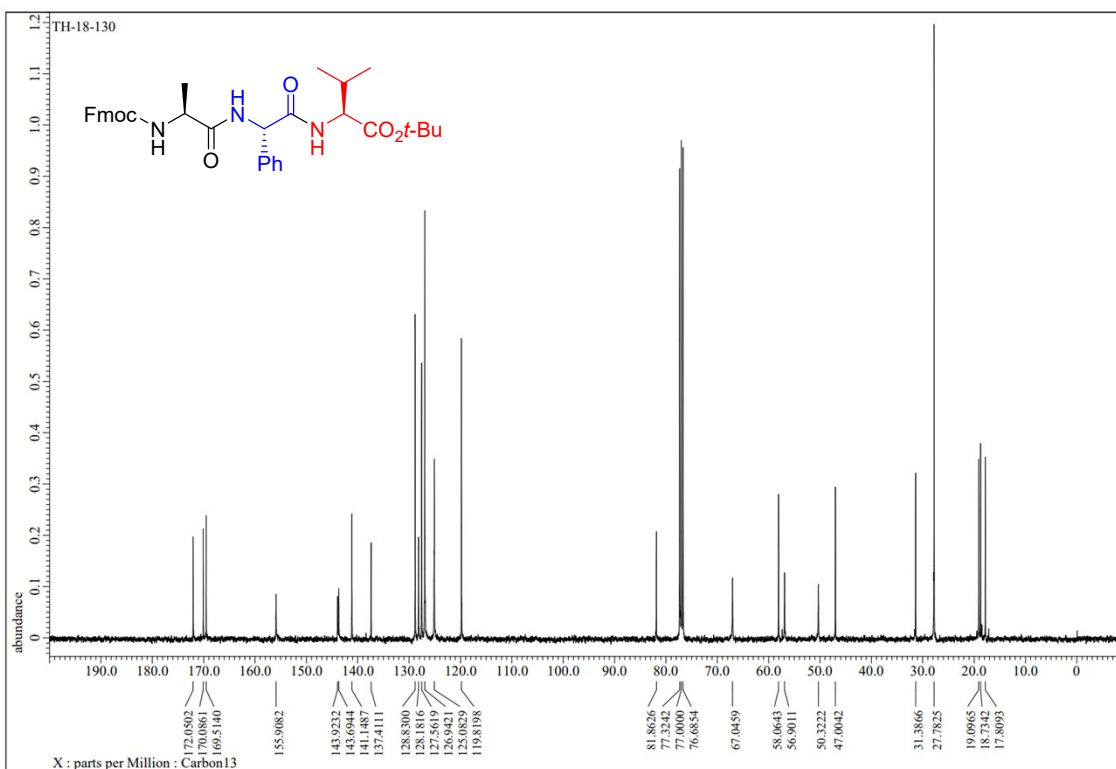

<sup>1</sup>H NMR (400 MHz, CDCl<sub>3</sub>) of **5w**

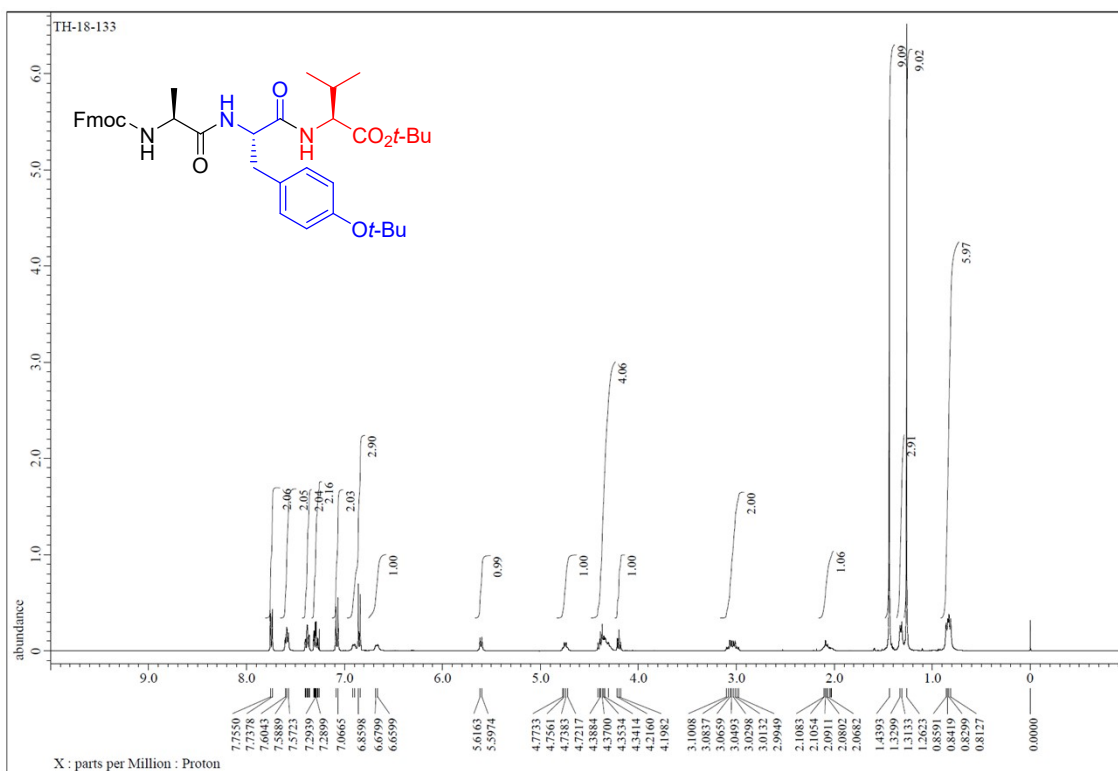

<sup>13</sup>C NMR (100 MHz, CDCl<sub>3</sub>) of **5w**

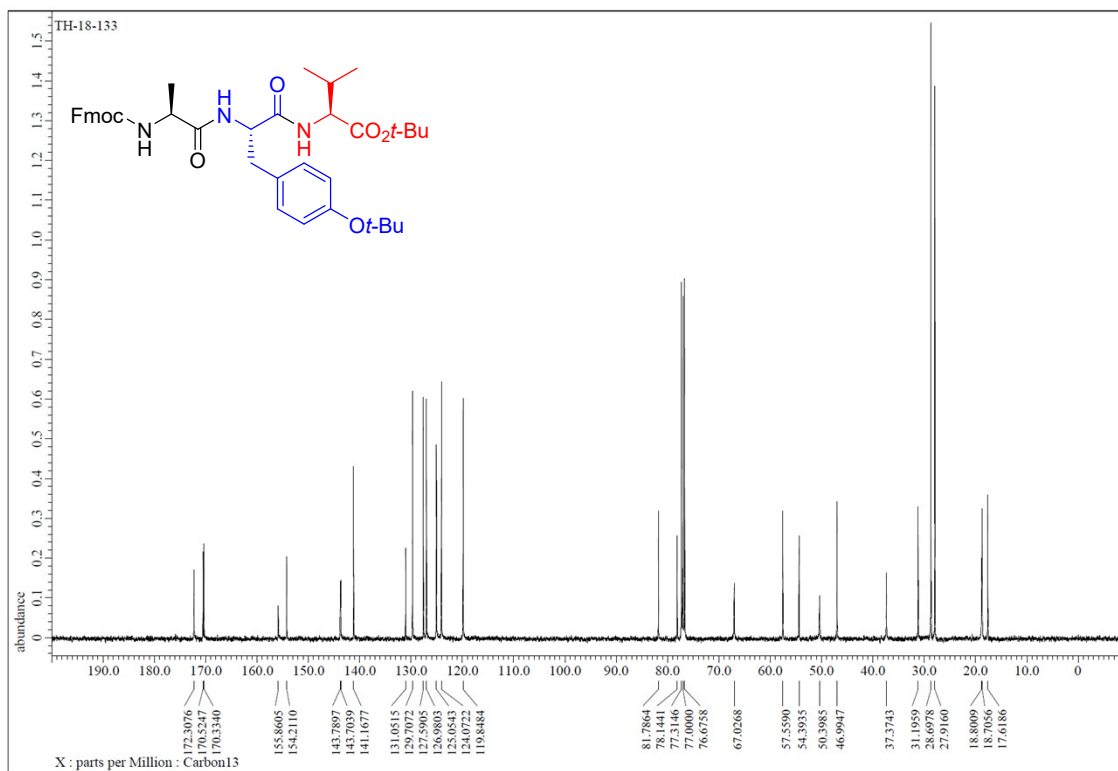

<sup>1</sup>H NMR (400 MHz, CDCl<sub>3</sub>) of 5x

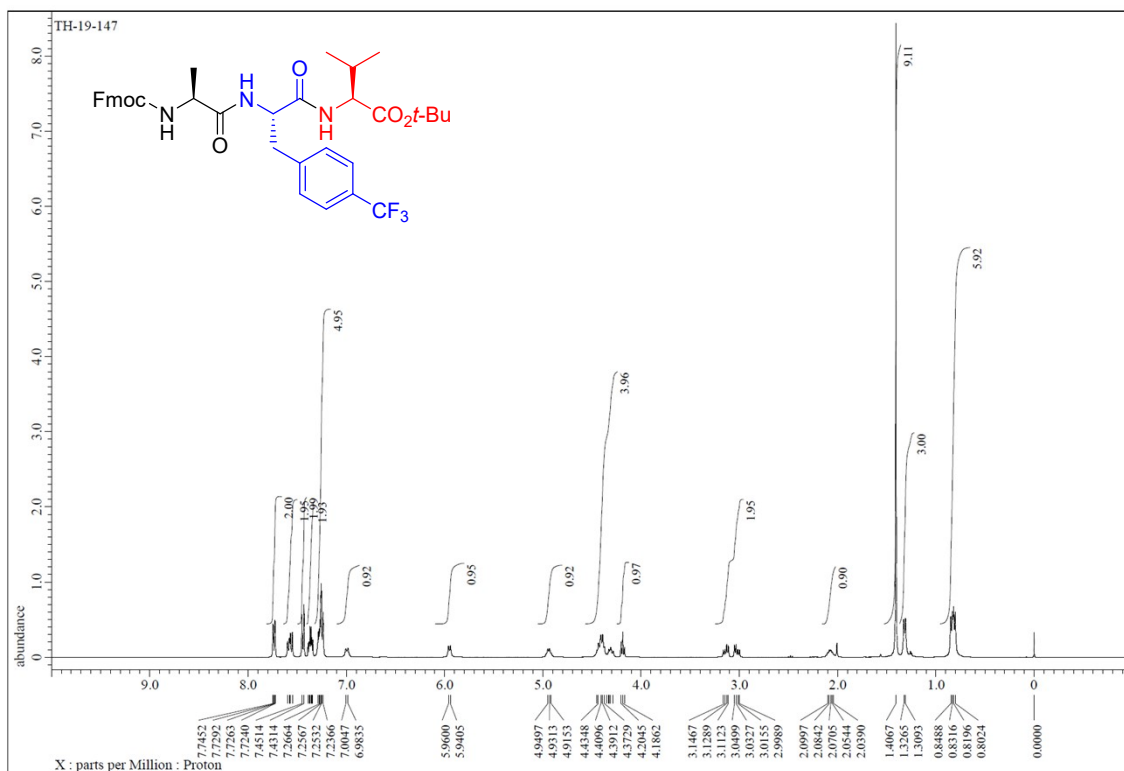

<sup>13</sup>C NMR (100 MHz, CDCl<sub>3</sub>) of 5x

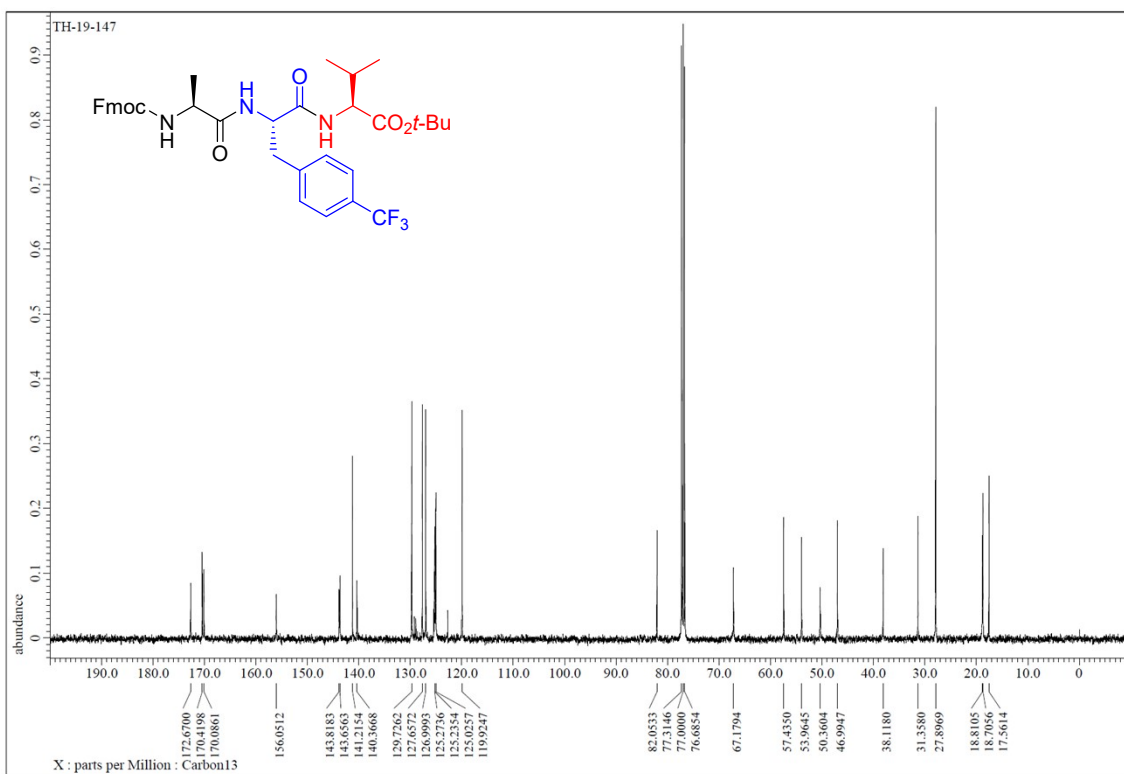

<sup>1</sup>H NMR (400 MHz, CDCl<sub>3</sub>) of **5y**

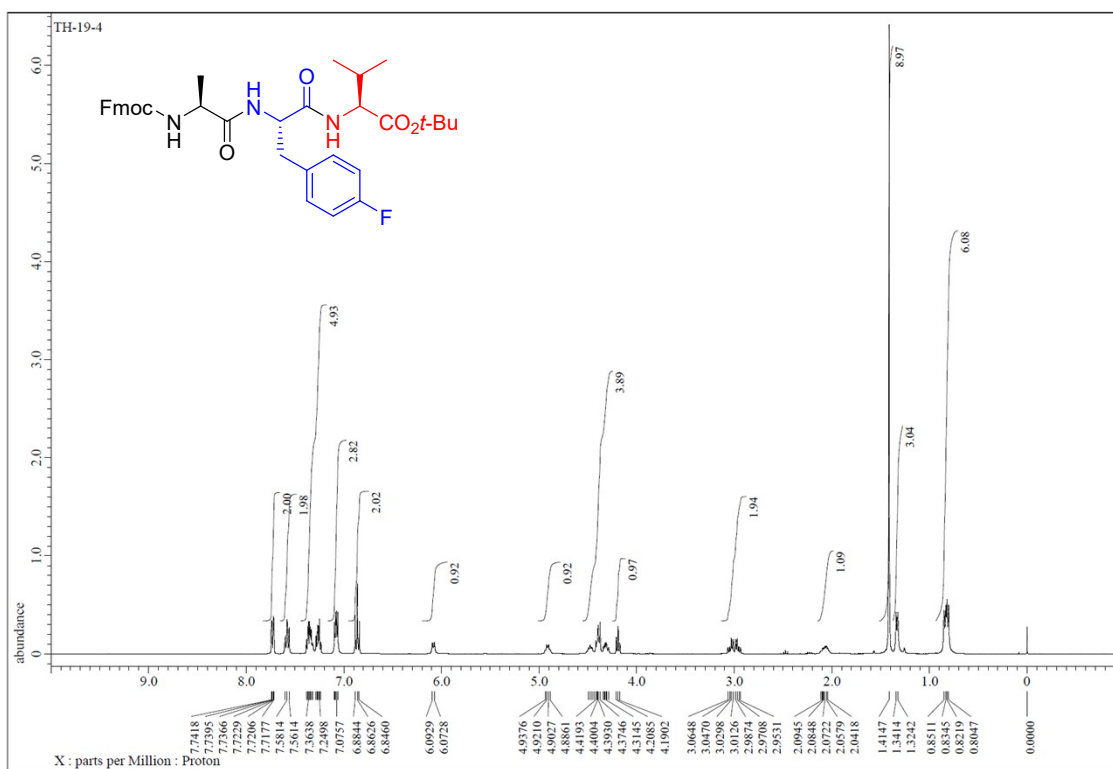

<sup>13</sup>C NMR (100 MHz, CDCl<sub>3</sub>) of **5y**

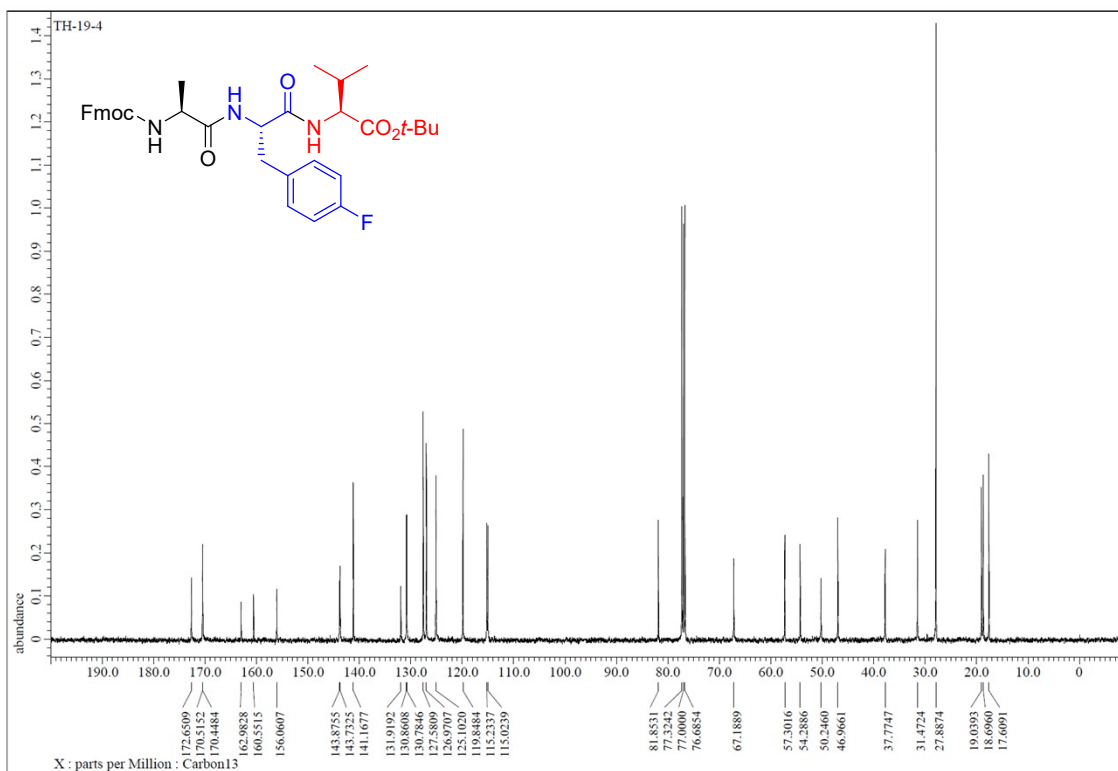



<sup>1</sup>H NMR (400 MHz, DMSO-d<sub>6</sub>) of **5z**

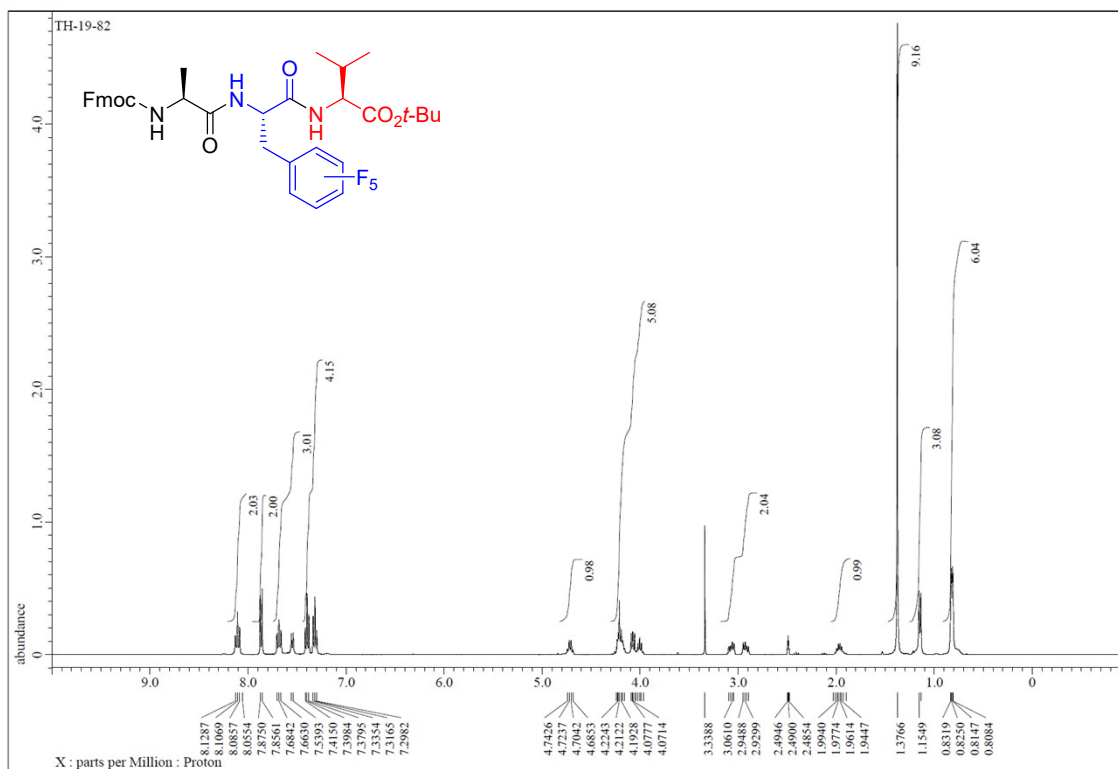

<sup>13</sup>C NMR (100 MHz, DMSO-d<sub>6</sub>) of **5z**

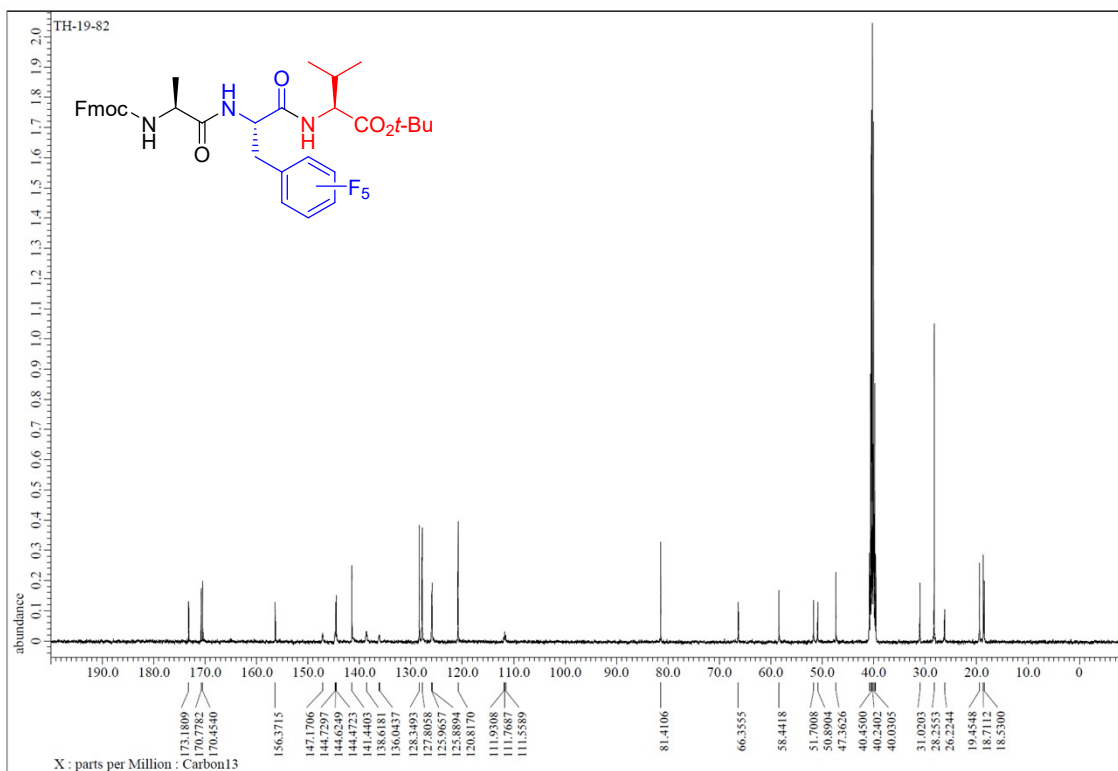

<sup>1</sup>H NMR (400 MHz, CDCl<sub>3</sub>) of **5aa**

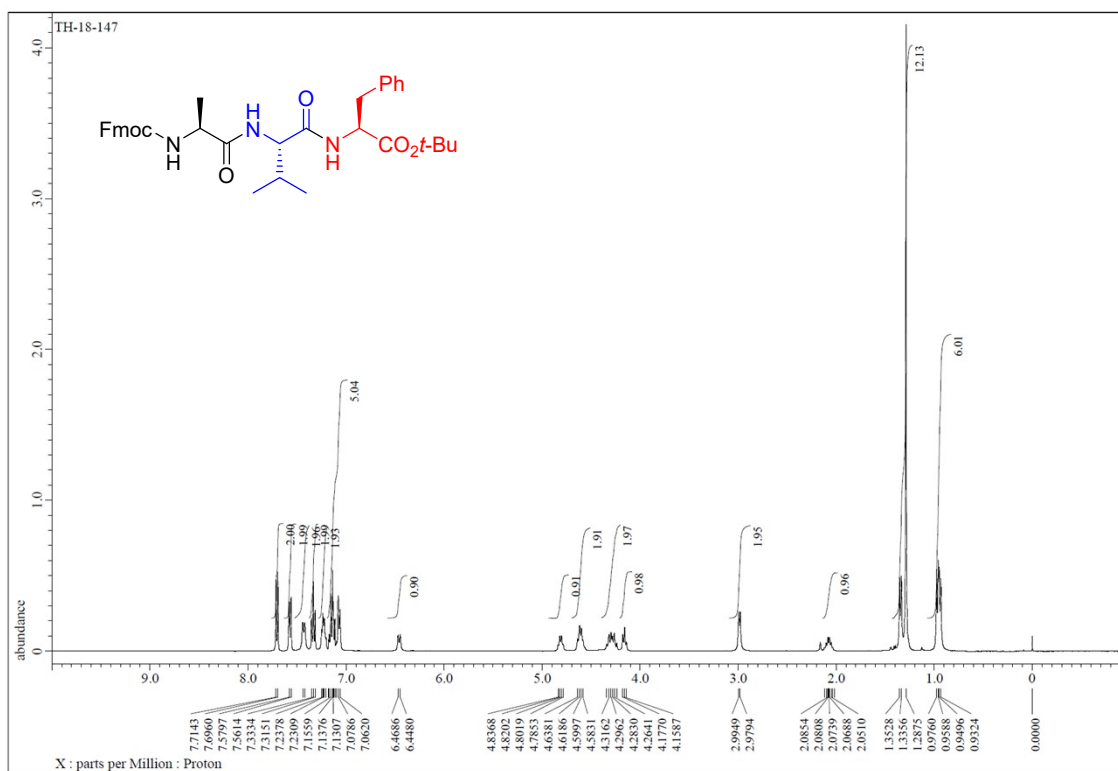

<sup>13</sup>C NMR (100 MHz, CDCl<sub>3</sub>) of **5aa**

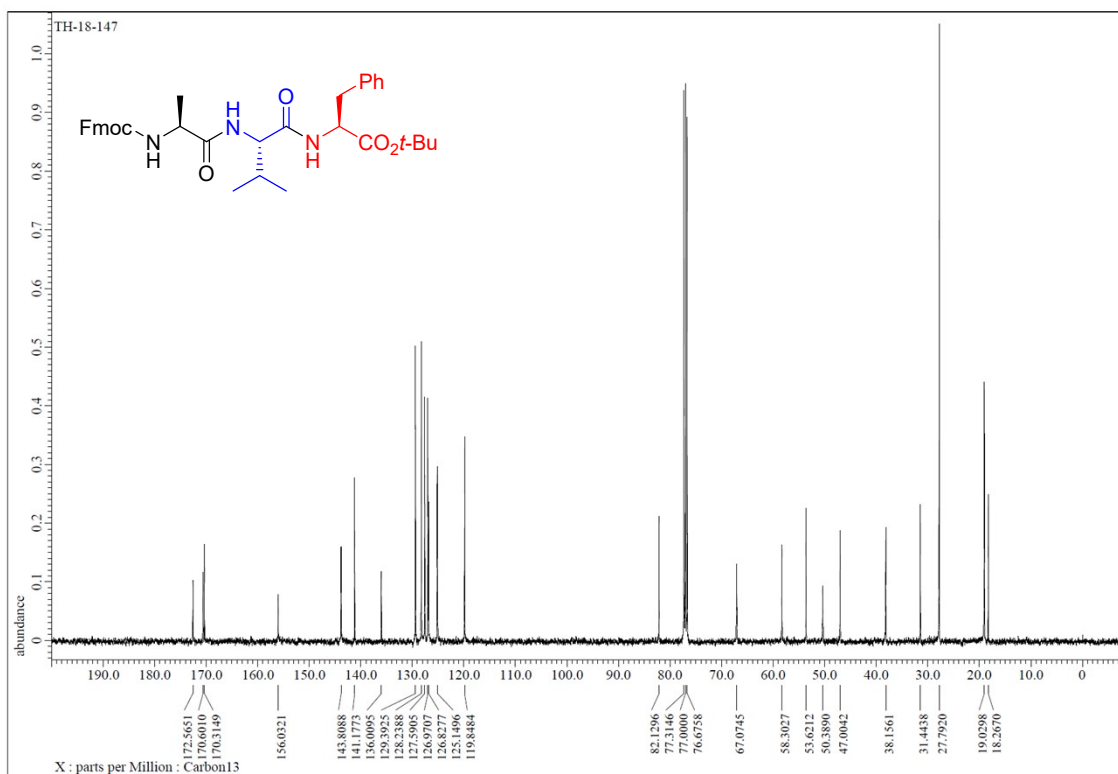

<sup>1</sup>H NMR (400 MHz, CDCl<sub>3</sub>) of **5ab**

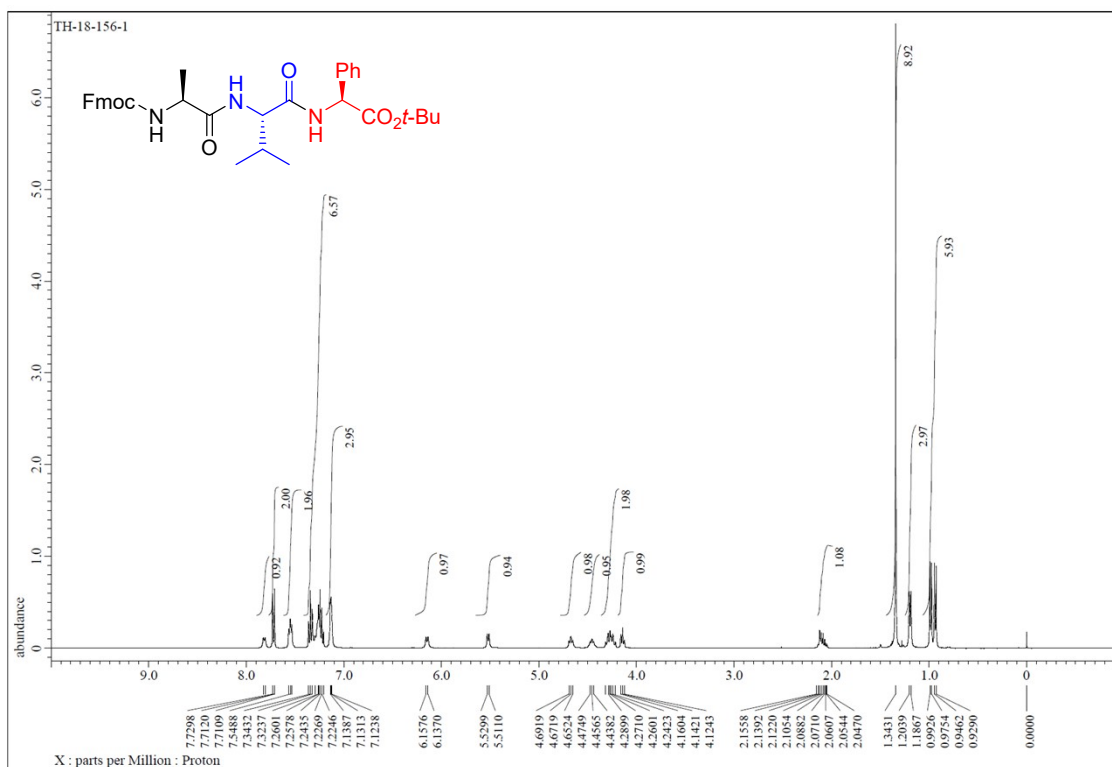

<sup>13</sup>C NMR (100 MHz, CDCl<sub>3</sub>) of **5ab**

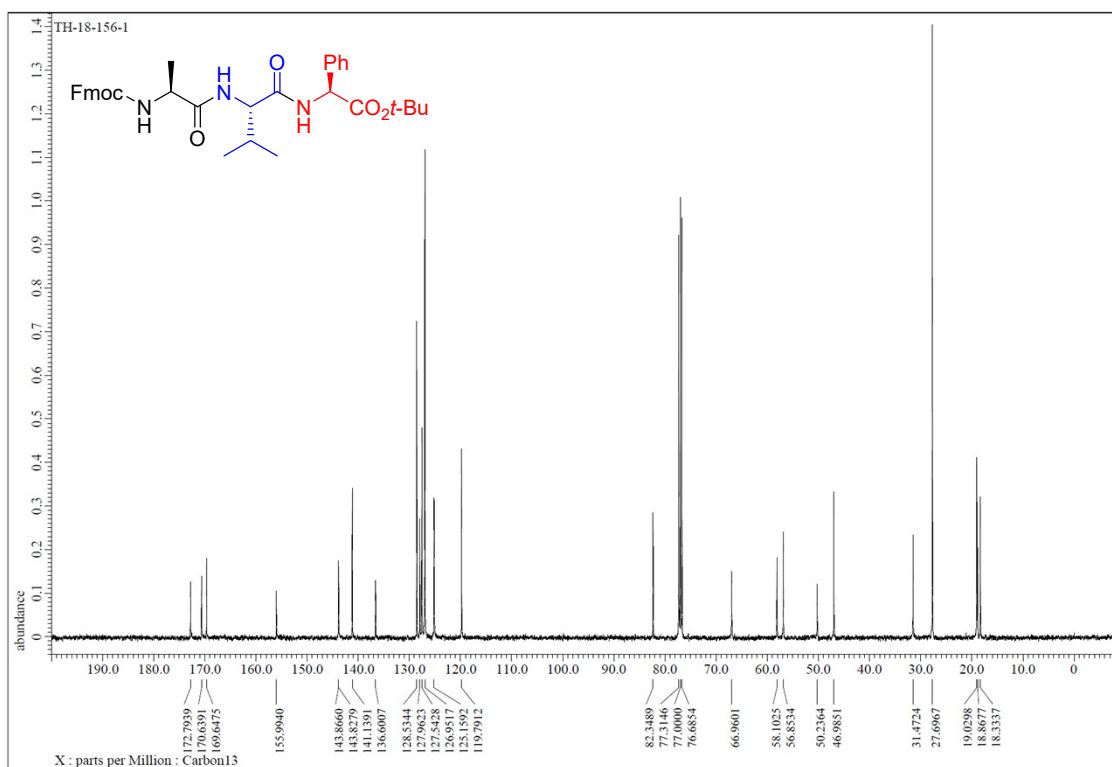

<sup>1</sup>H NMR (400 MHz, CDCl<sub>3</sub>) of **5ac**

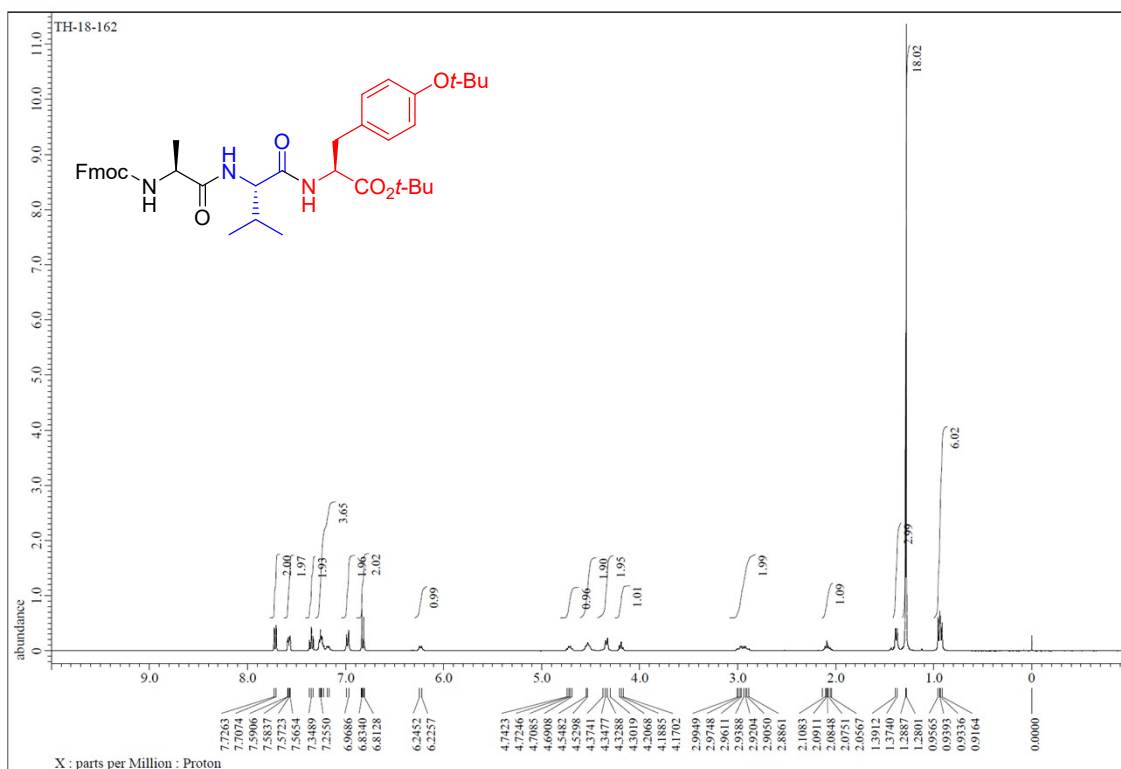

<sup>13</sup>C NMR (100 MHz, CDCl<sub>3</sub>) of **5ac**

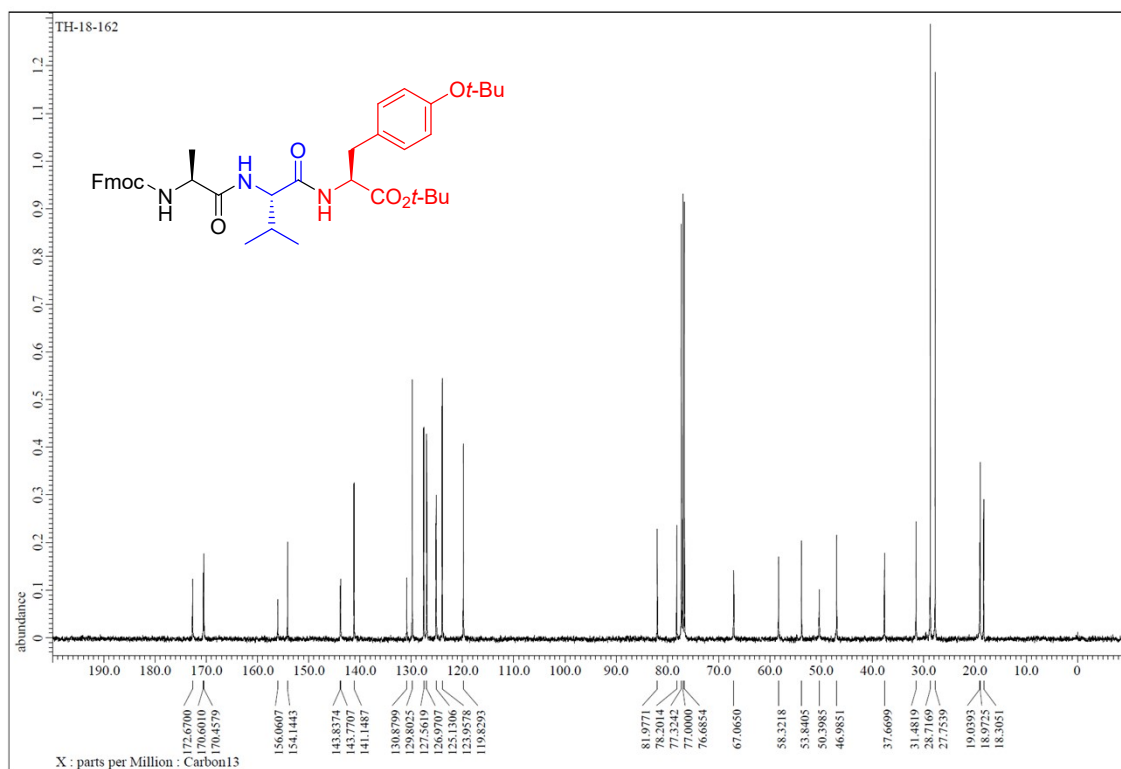

<sup>1</sup>H NMR (400 MHz, CDCl<sub>3</sub>) of **5ad**

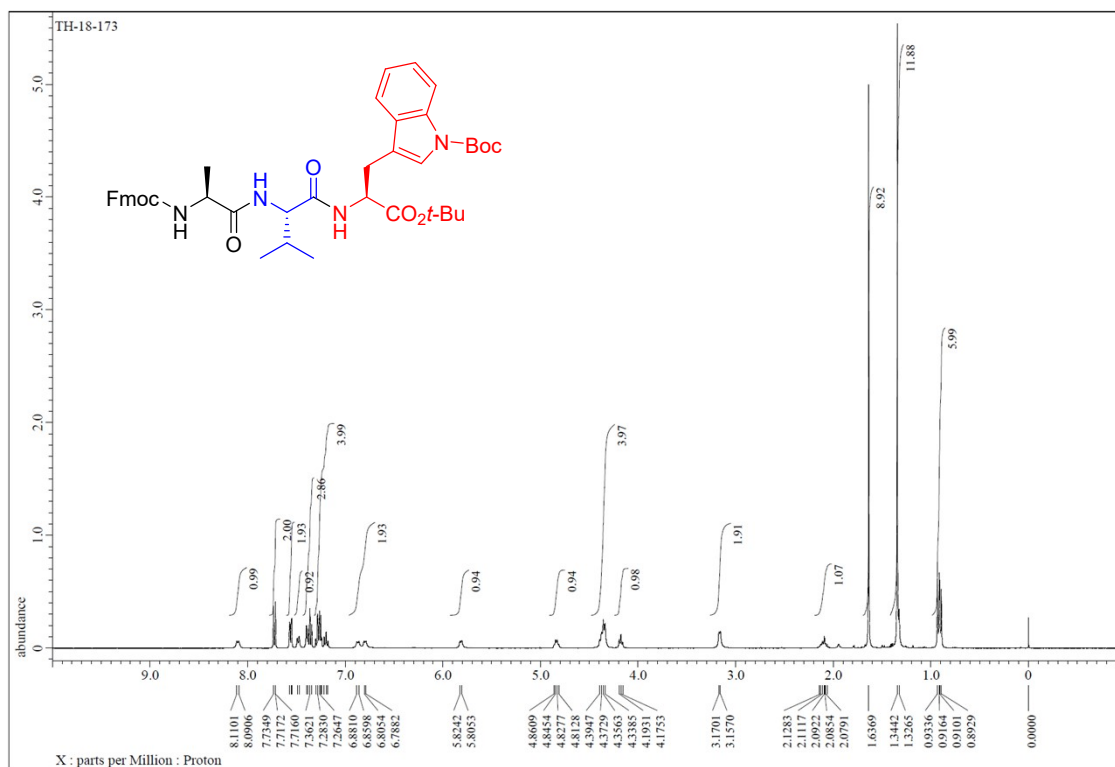

<sup>13</sup>C NMR (100 MHz, CDCl<sub>3</sub>) of **5ad**

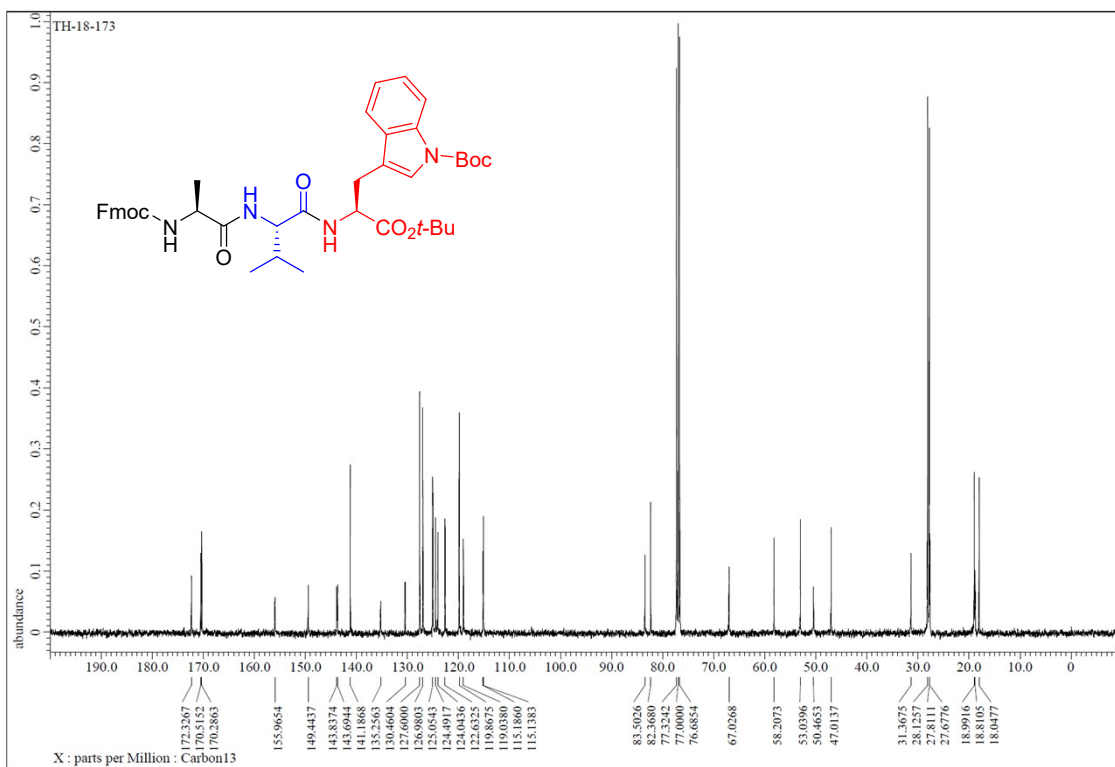

<sup>1</sup>H NMR (400 MHz, CDCl<sub>3</sub>) of **5ae**

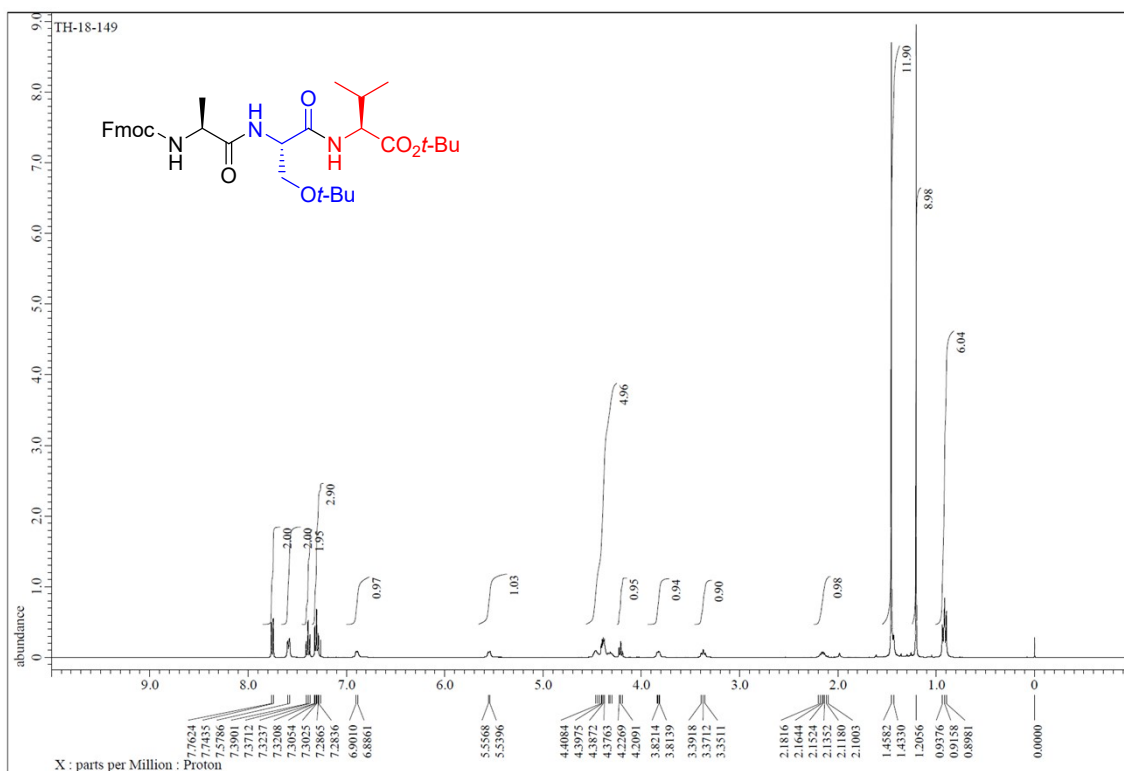

<sup>13</sup>C NMR (100 MHz, CDCl<sub>3</sub>) of **5ae**

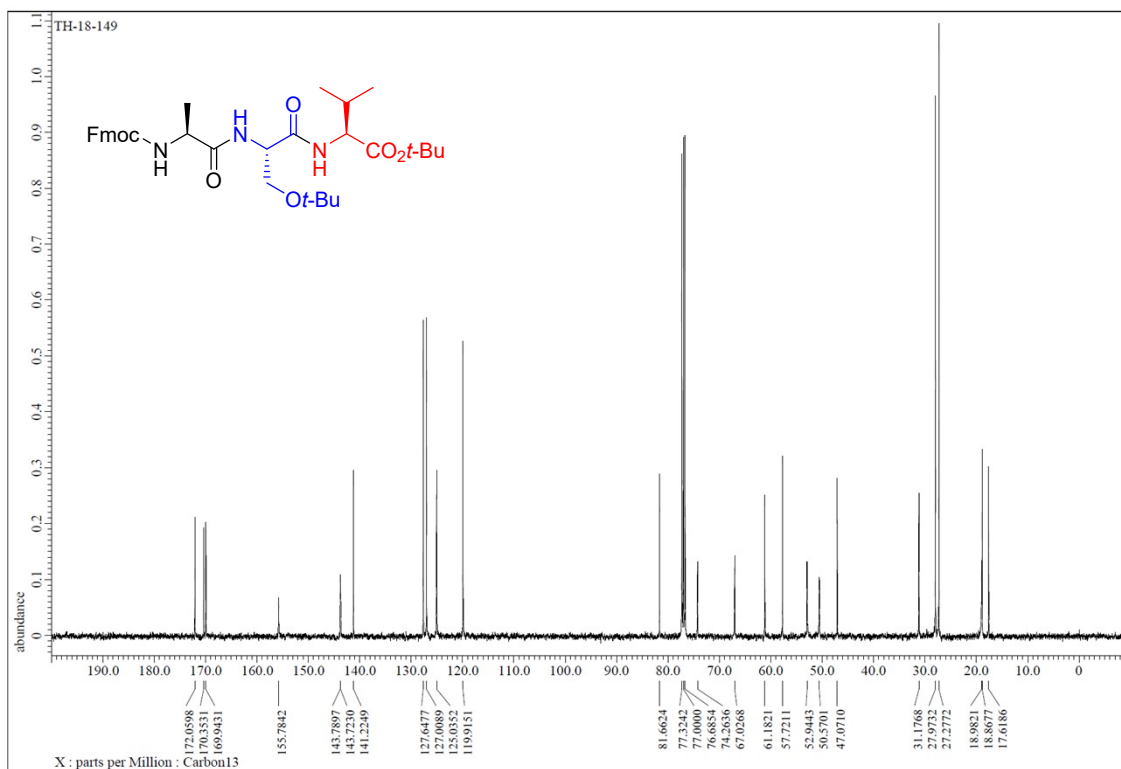

<sup>1</sup>H NMR (400 MHz, CDCl<sub>3</sub>) of **5af**

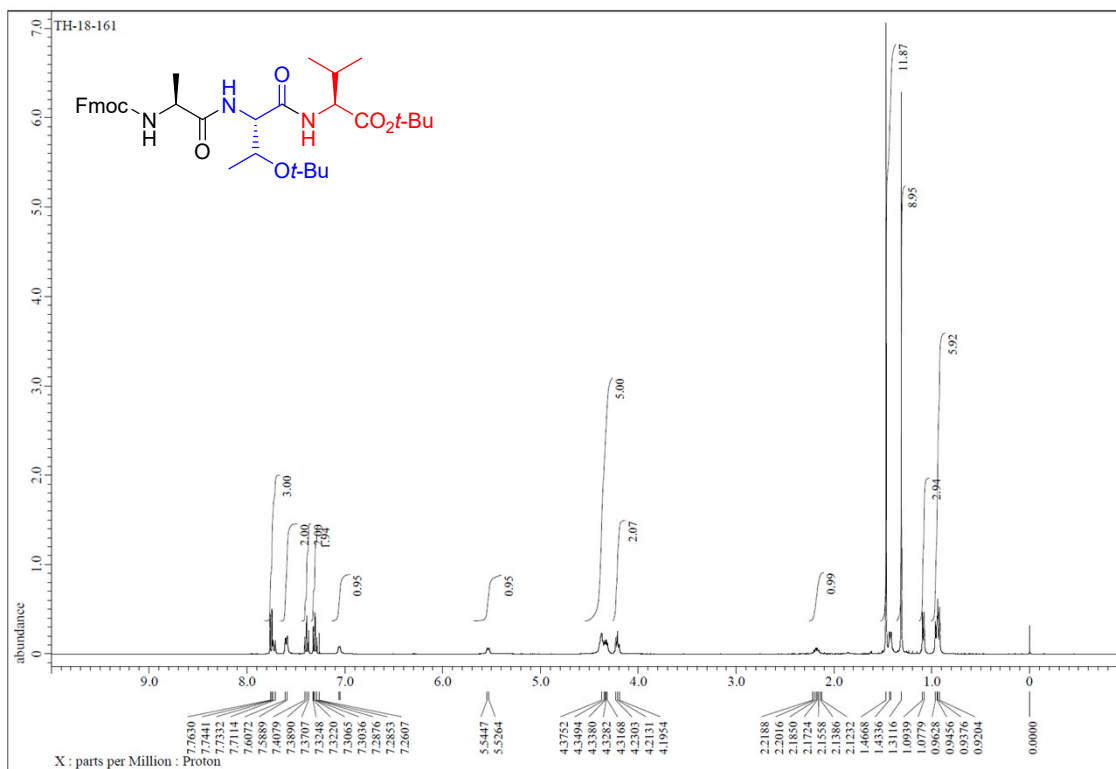

<sup>13</sup>C NMR (100 MHz, CDCl<sub>3</sub>) of **5af**

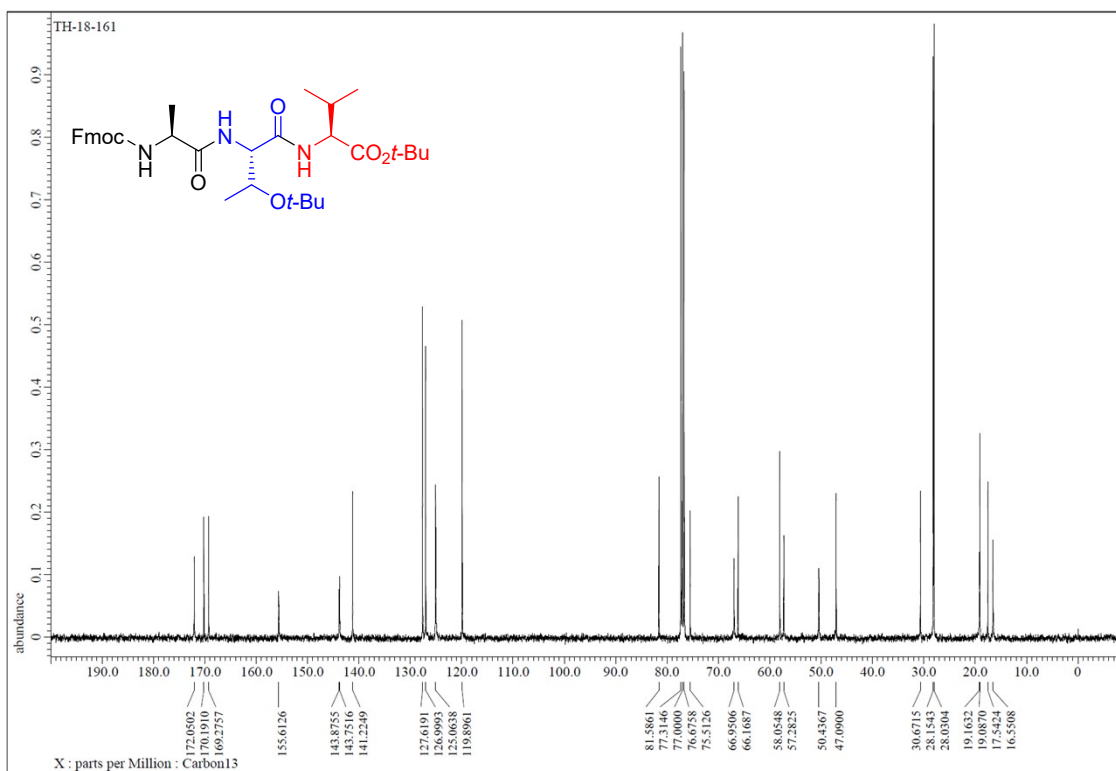

<sup>1</sup>H NMR (400 MHz, CDCl<sub>3</sub>) of **5ag**

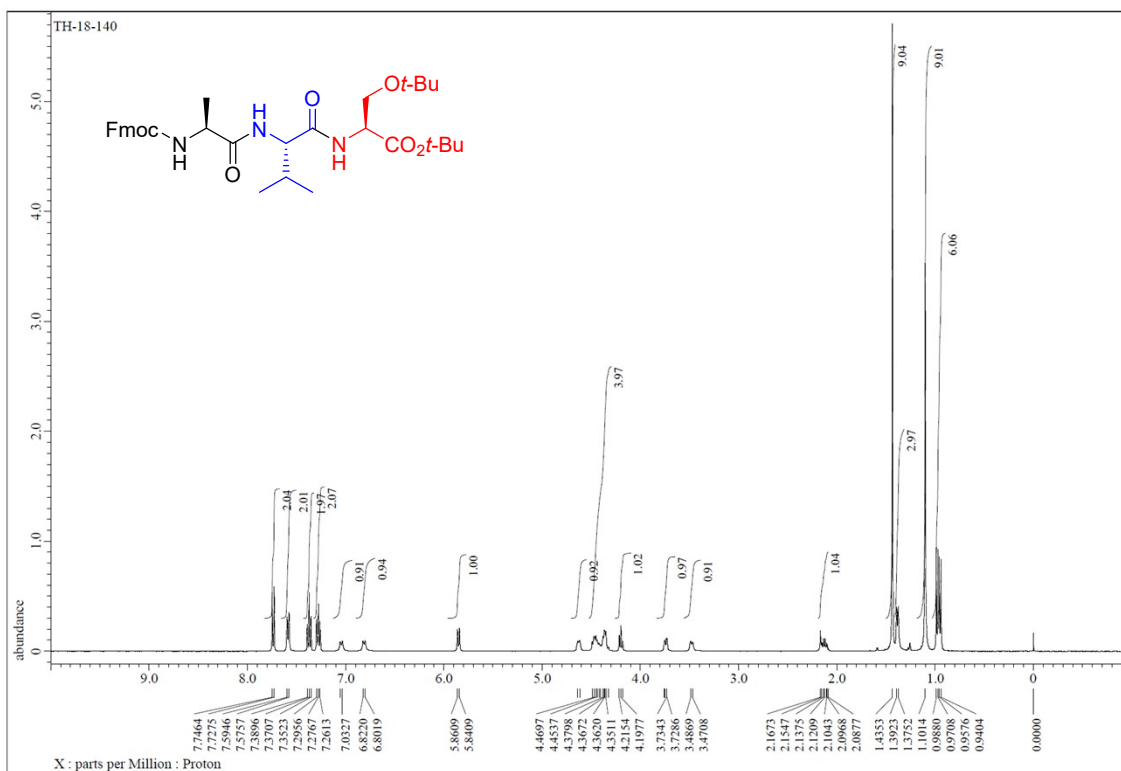

<sup>13</sup>C NMR (100 MHz, CDCl<sub>3</sub>) of **5ag**

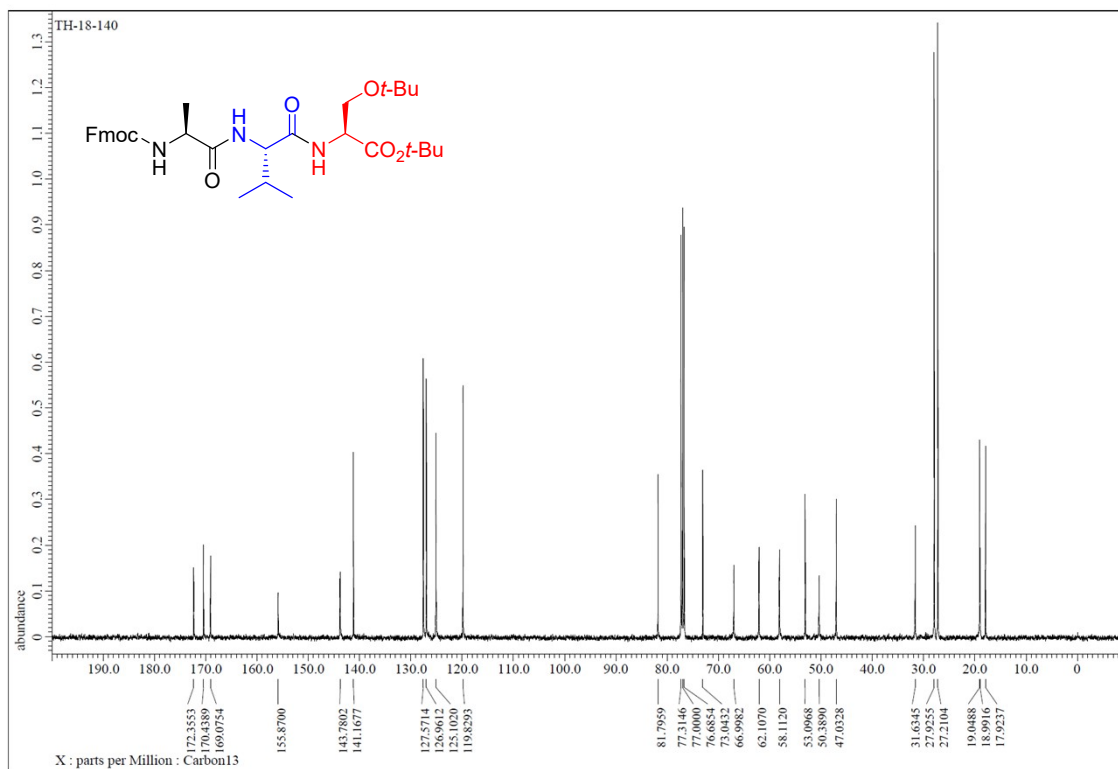



<sup>1</sup>H NMR (400 MHz, CDCl<sub>3</sub>) of **5ah**

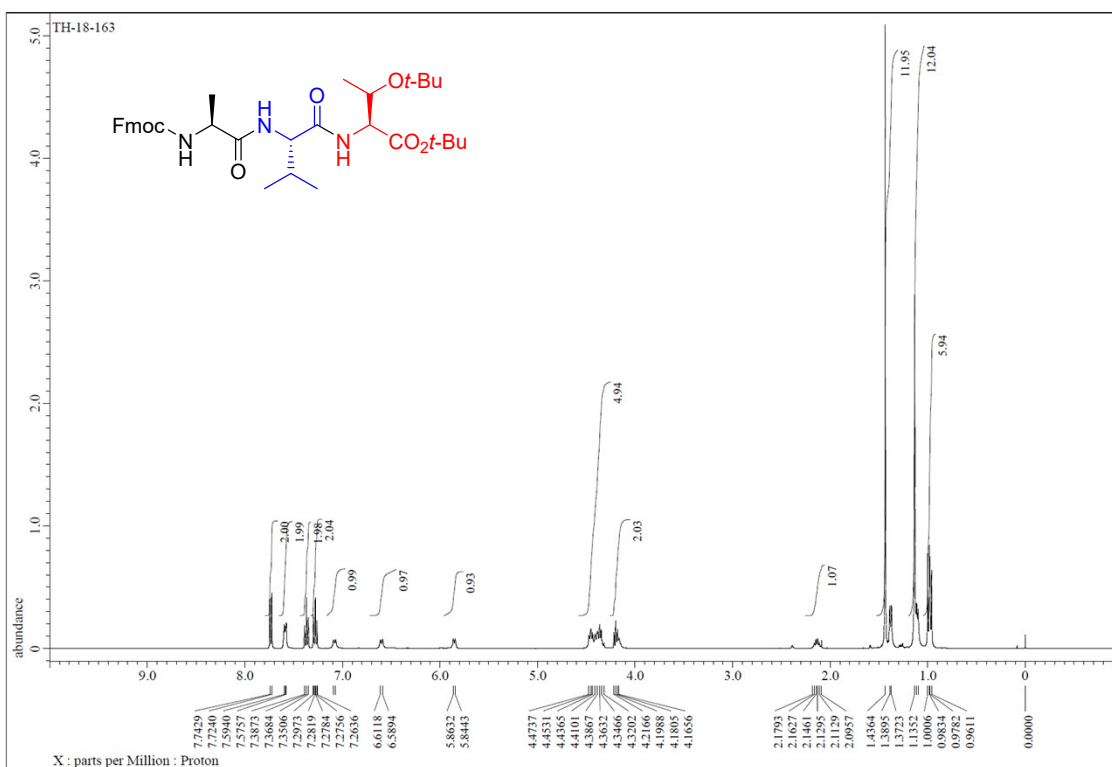

<sup>13</sup>C NMR (100 MHz, CDCl<sub>3</sub>) of **5ah**

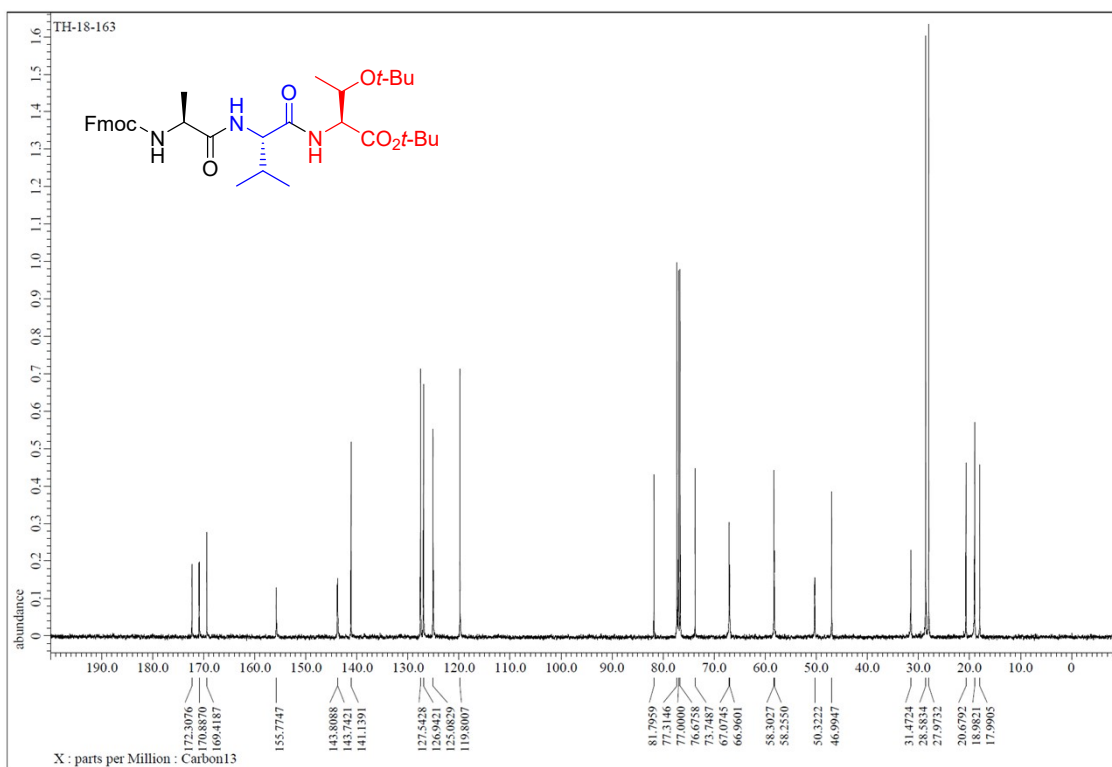

<sup>1</sup>H NMR (400 MHz, CDCl<sub>3</sub>) of **5ai**

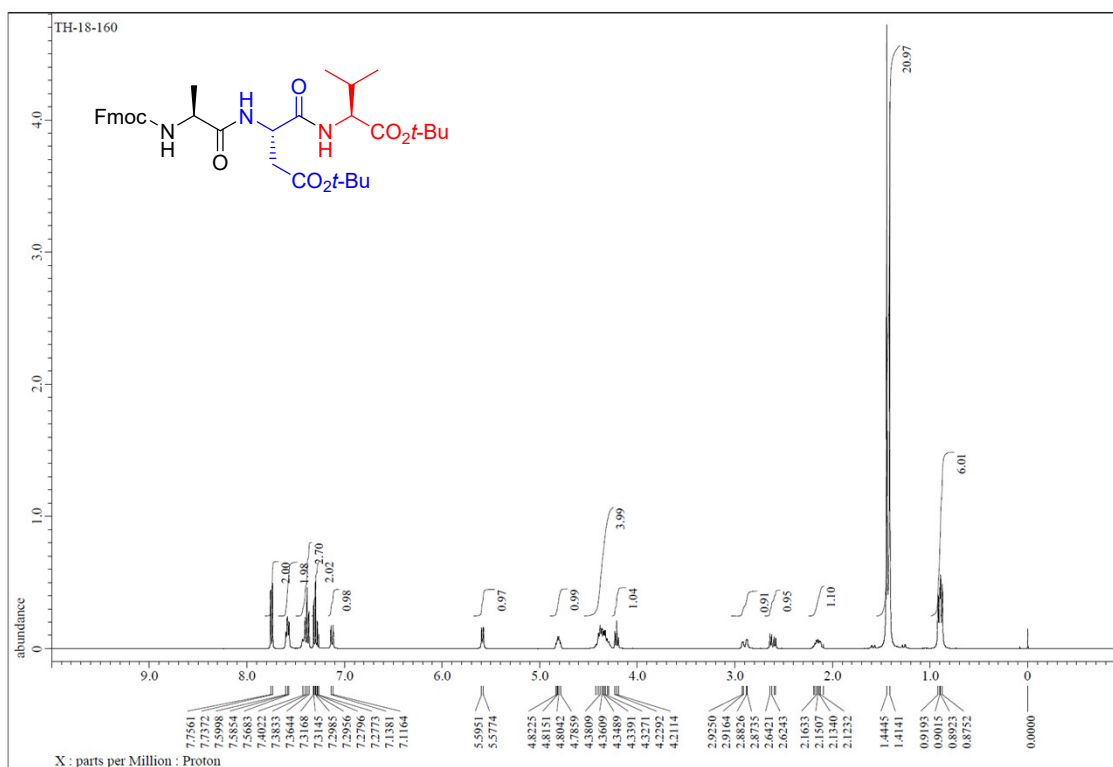

<sup>13</sup>C NMR (100 MHz, CDCl<sub>3</sub>) of **5ai**

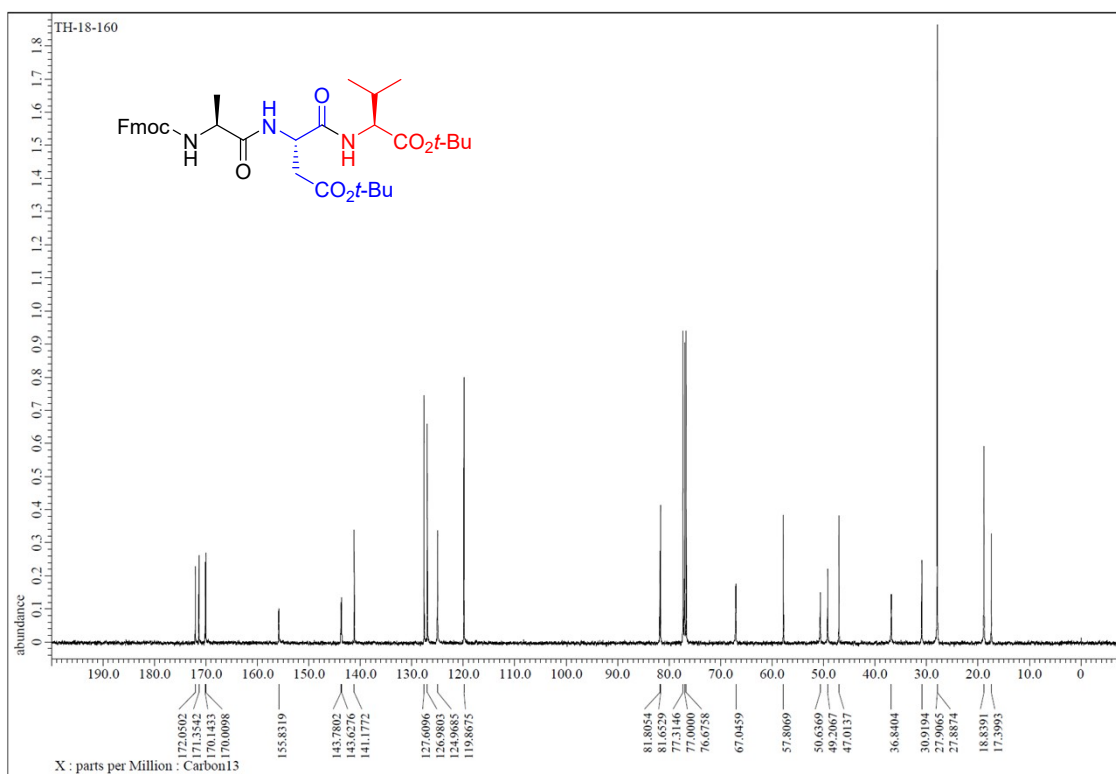

<sup>1</sup>H NMR (400 MHz, CDCl<sub>3</sub>) of **5aj**

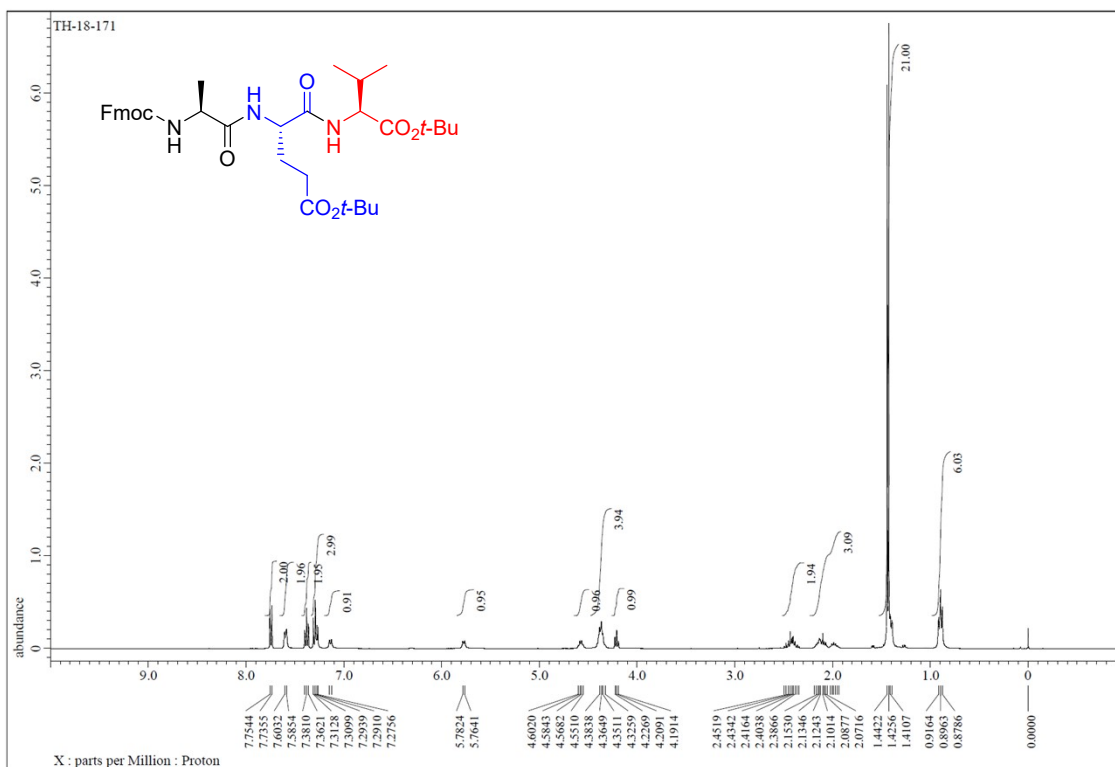

<sup>13</sup>C NMR (100 MHz, CDCl<sub>3</sub>) of **5aj**

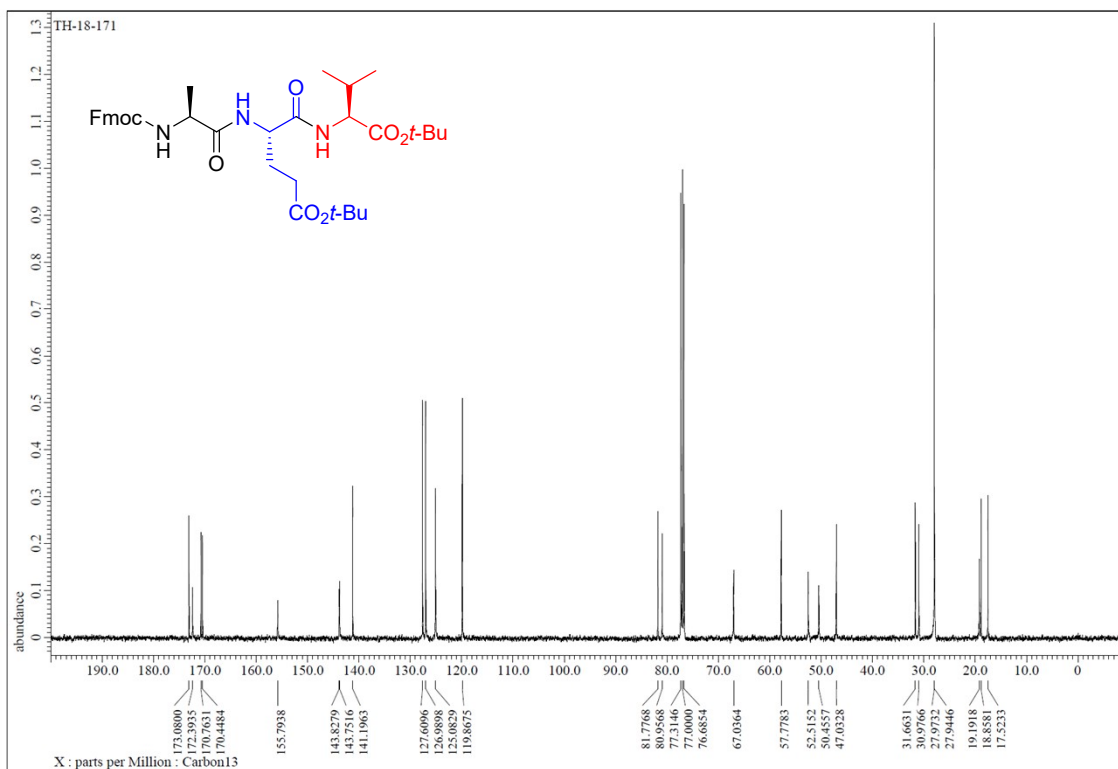

<sup>1</sup>H NMR (400 MHz, CDCl<sub>3</sub>) of **5ak**

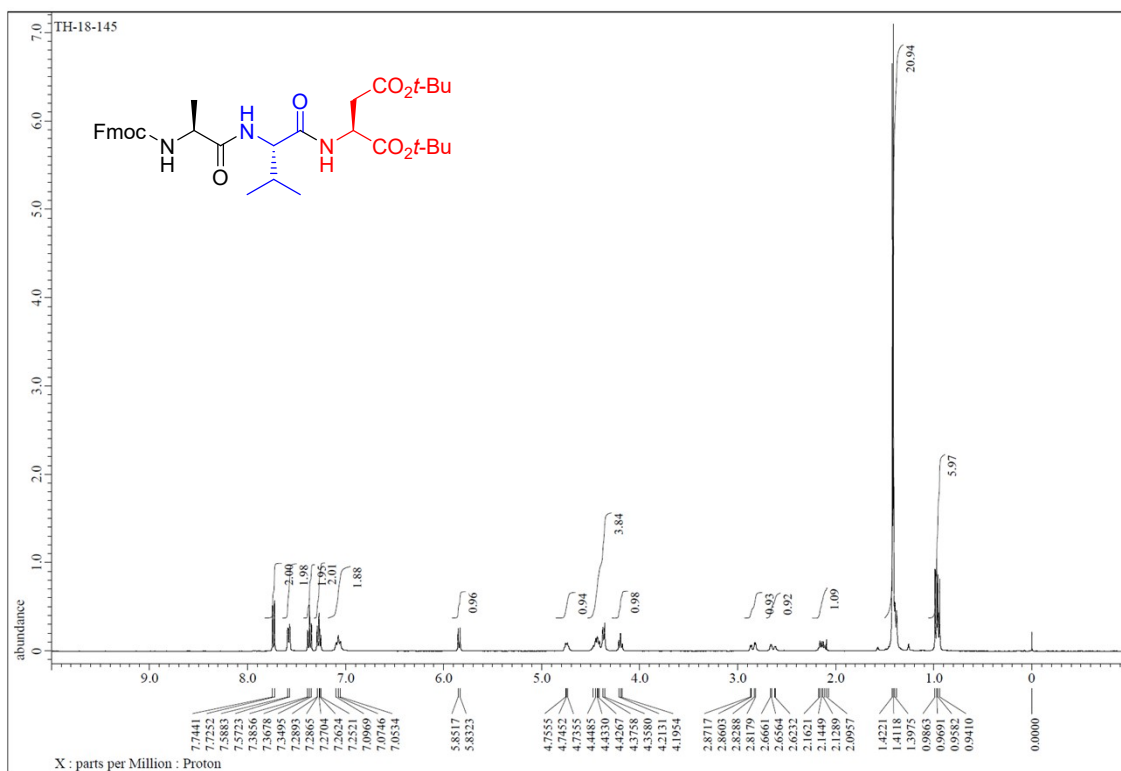

<sup>13</sup>C NMR (100 MHz, CDCl<sub>3</sub>) of **5ak**

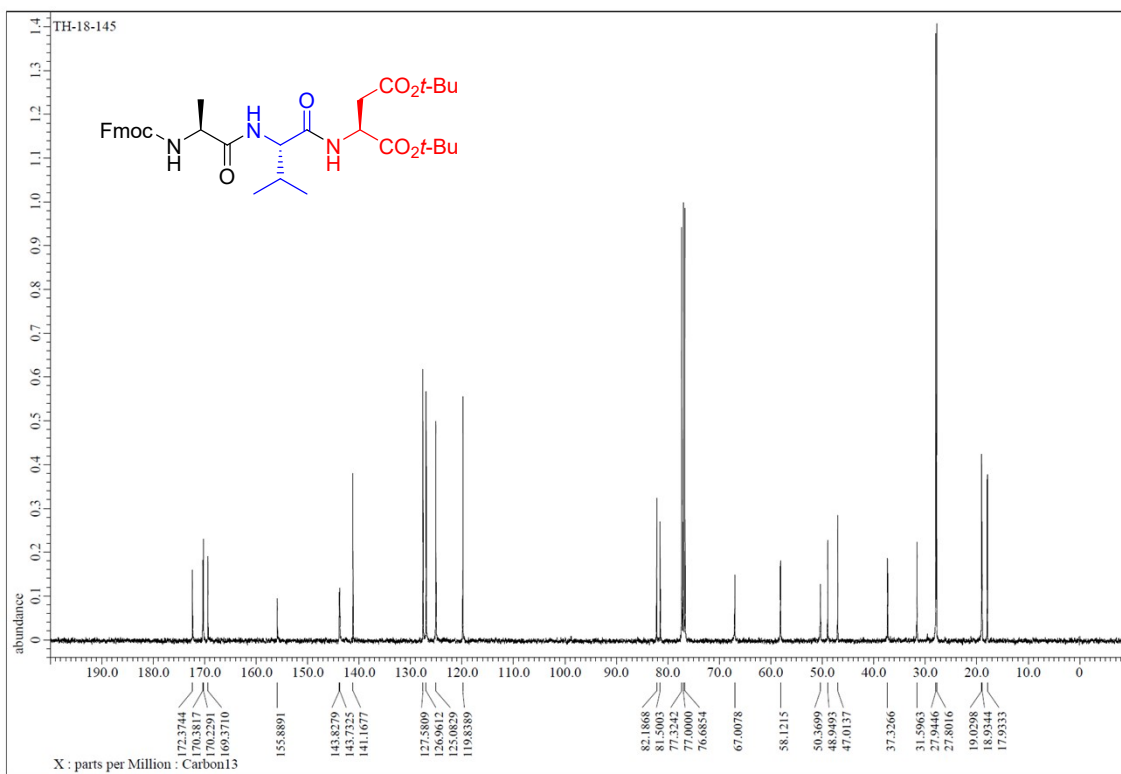

<sup>1</sup>H NMR (400 MHz, CDCl<sub>3</sub>) of **5al**

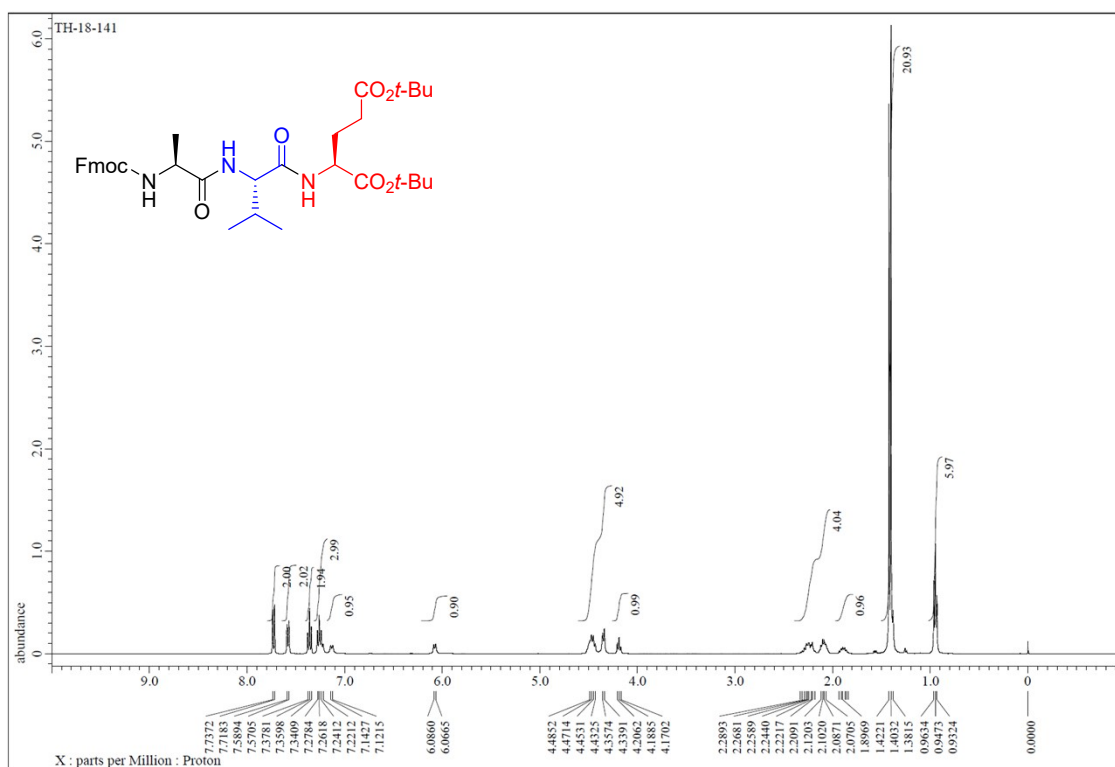

<sup>13</sup>C NMR (100 MHz, CDCl<sub>3</sub>) of **5al**

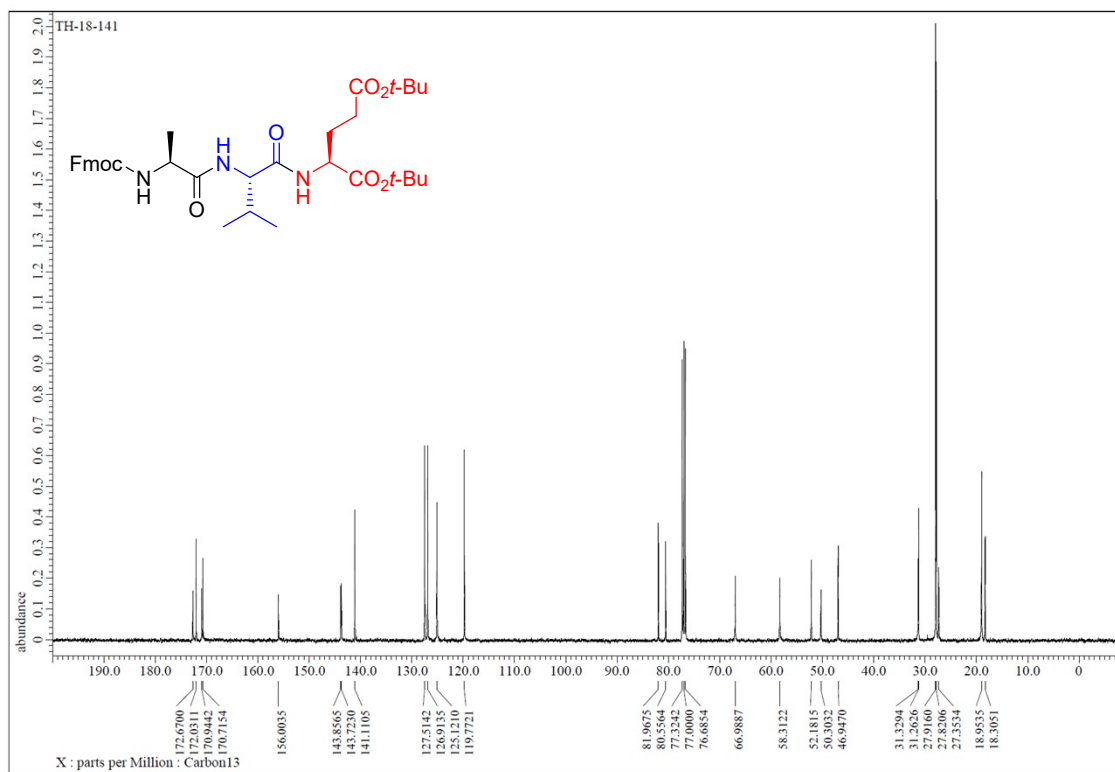

<sup>1</sup>H NMR (400 MHz, CDCl<sub>3</sub>) of **5am**

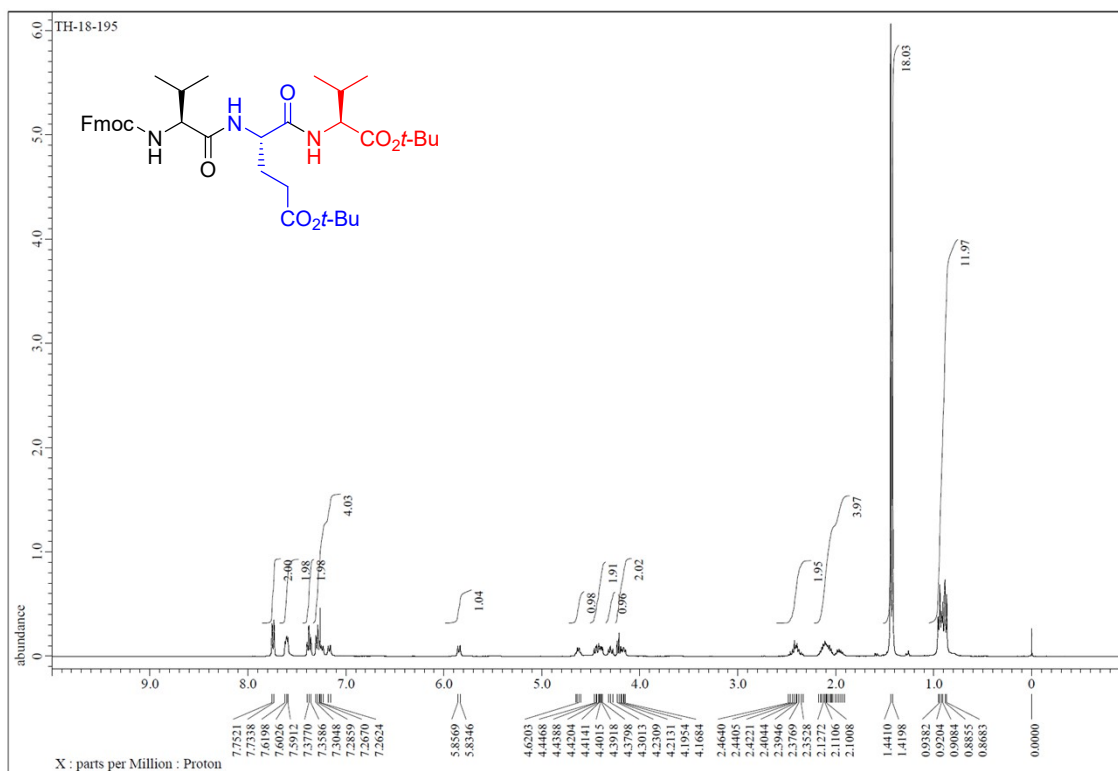

<sup>13</sup>C NMR (100 MHz, CDCl<sub>3</sub>) of **5am**

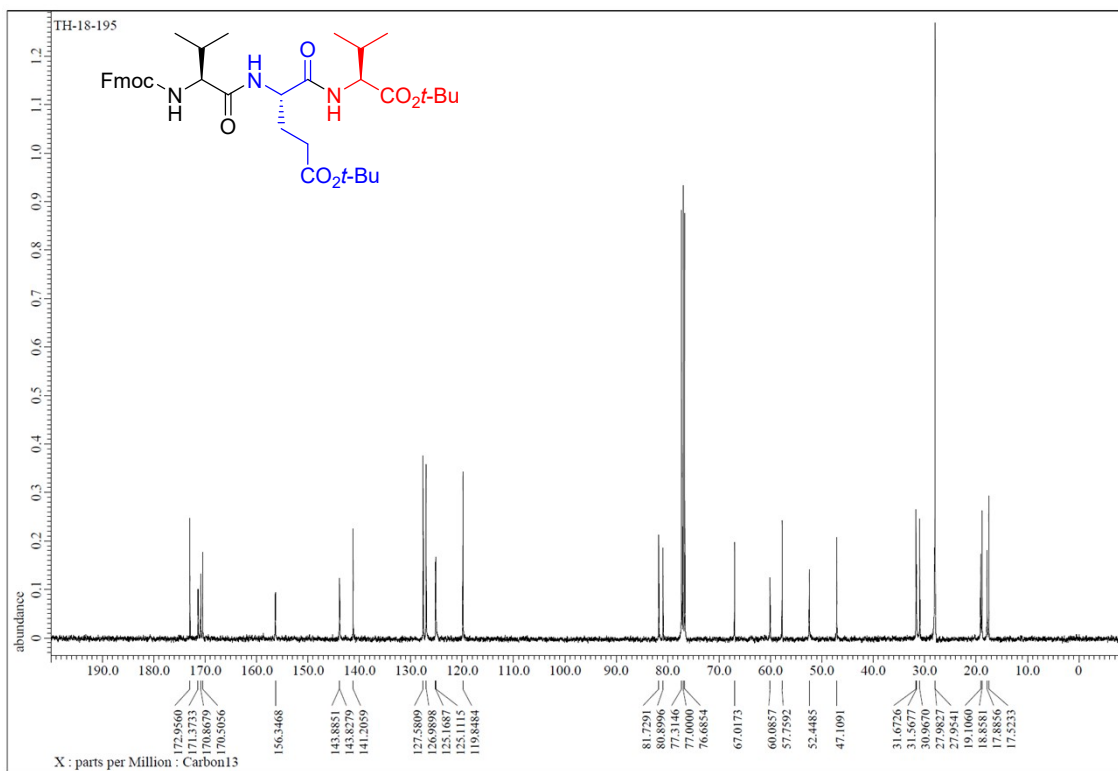

<sup>1</sup>H NMR (400 MHz, CDCl<sub>3</sub>) of **5an**

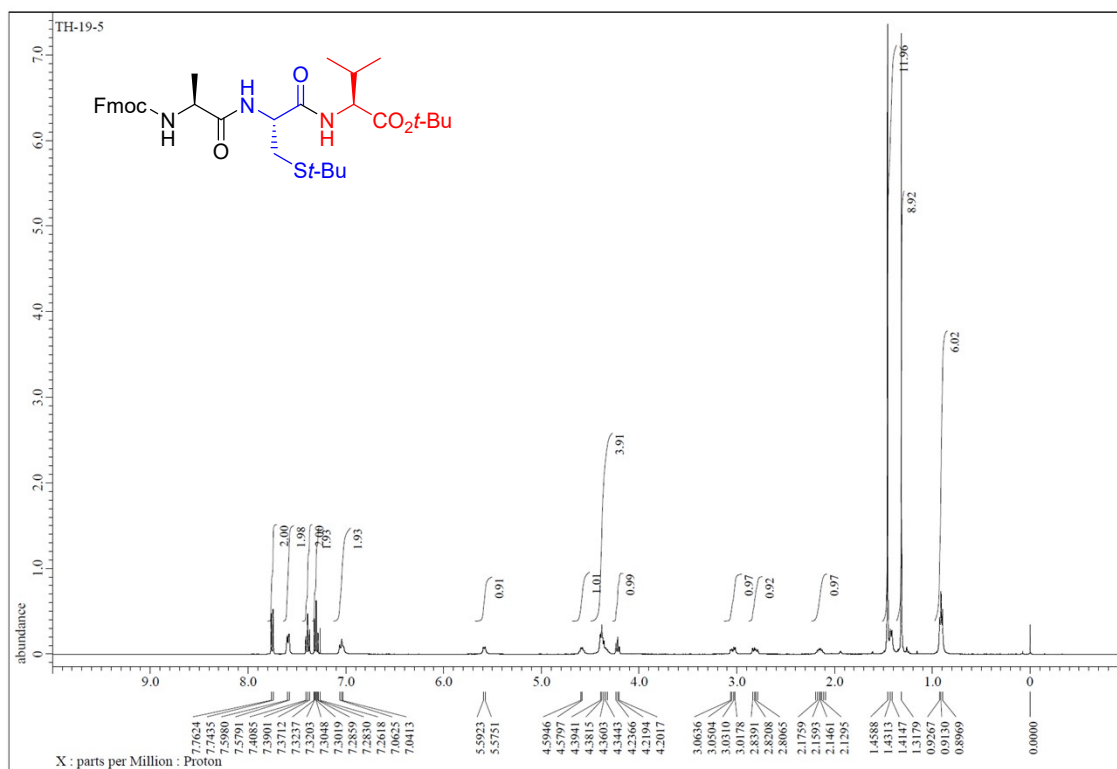

<sup>13</sup>C NMR (100 MHz, CDCl<sub>3</sub>) of **5an**

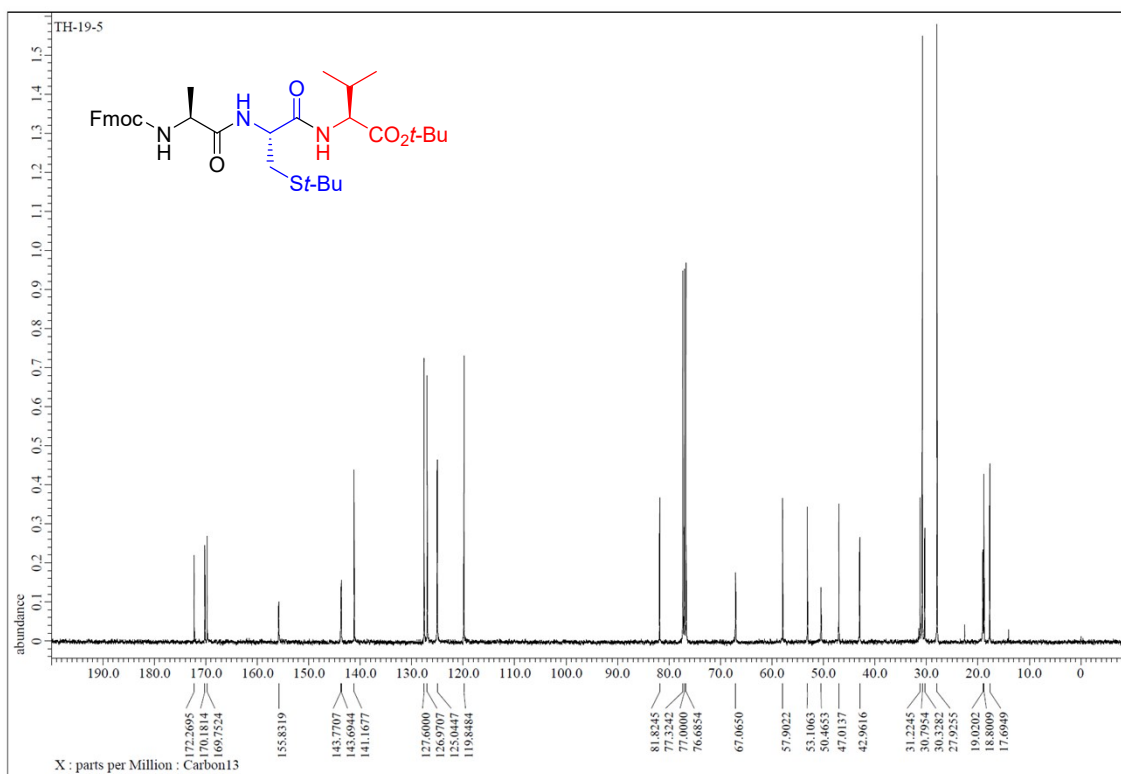

<sup>1</sup>H NMR (400 MHz, CDCl<sub>3</sub>) of **5ao**

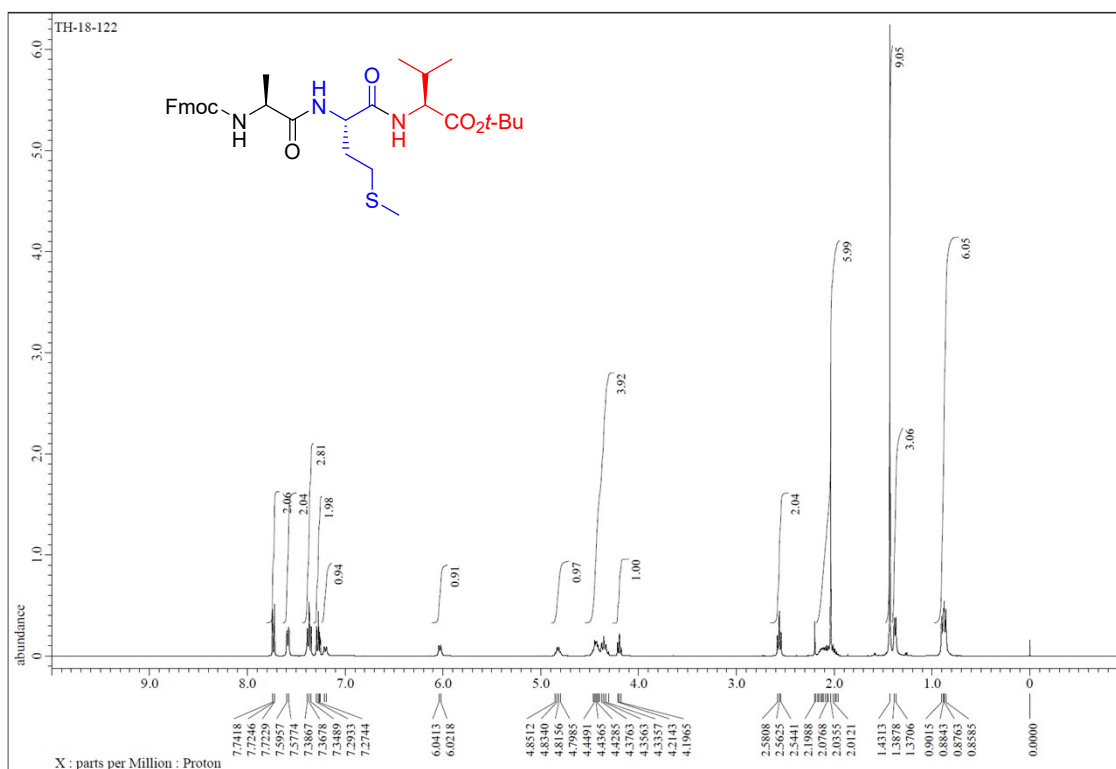

<sup>13</sup>C NMR (100 MHz, CDCl<sub>3</sub>) of **5ao**

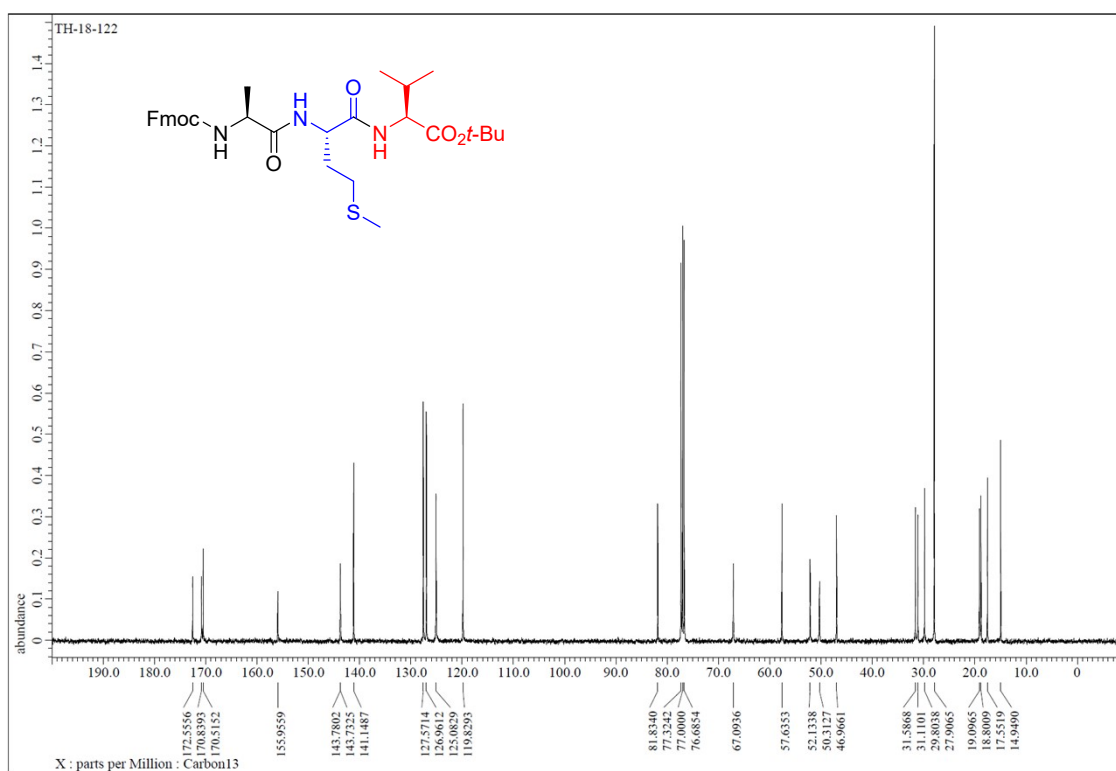



<sup>1</sup>H NMR (400 MHz, CDCl<sub>3</sub>) of **5ap**

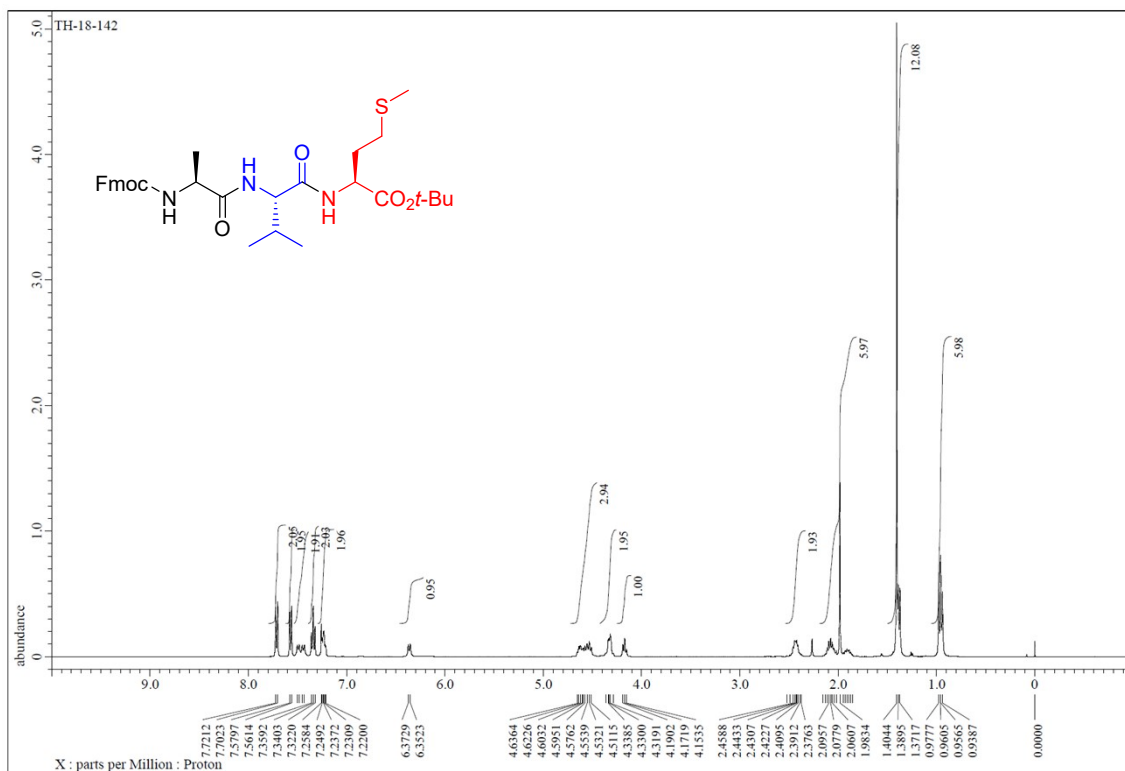

<sup>13</sup>C NMR (100 MHz, CDCl<sub>3</sub>) of **5ap**

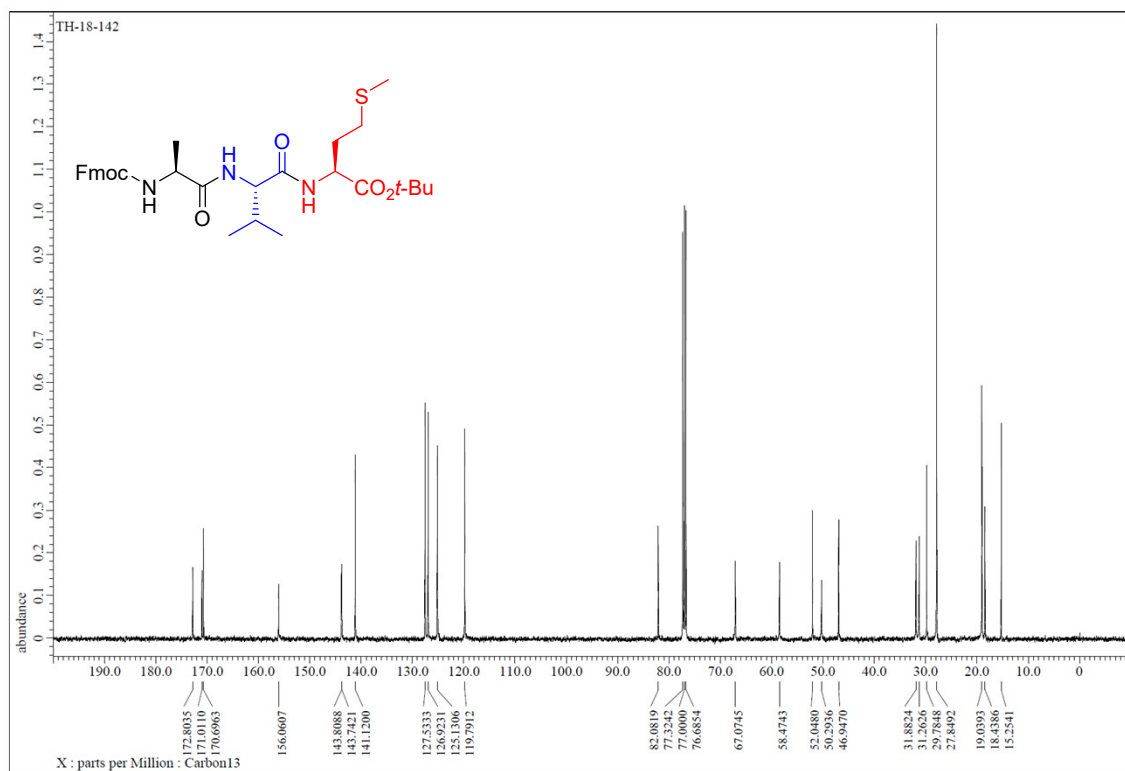

<sup>1</sup>H NMR (400 MHz, DMSO-d<sub>6</sub>) of **5aq**

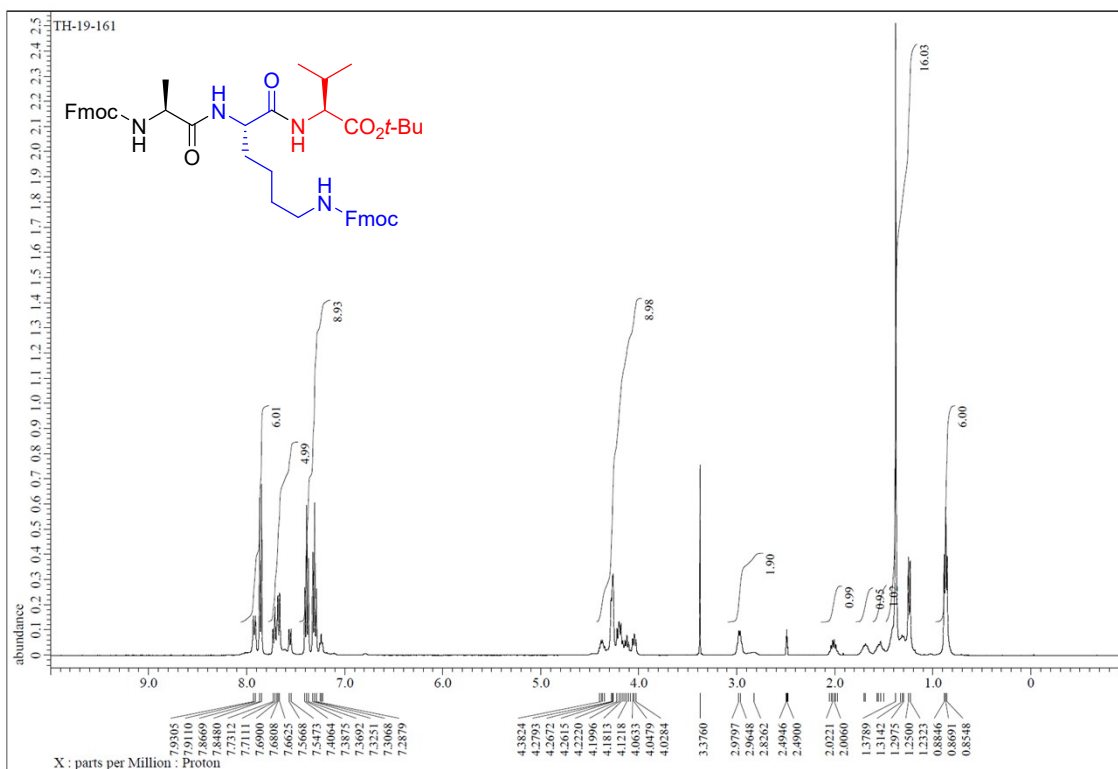

<sup>13</sup>C NMR (100 MHz, DMSO-d<sub>6</sub>) of **5aq**

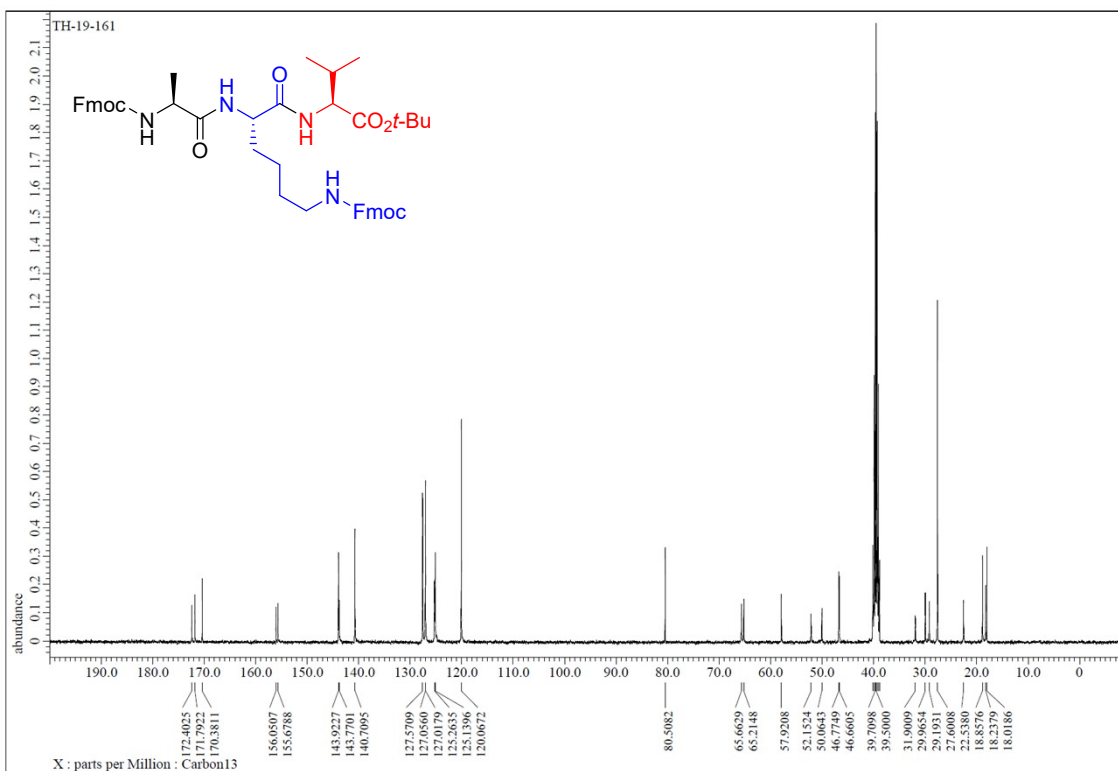

<sup>1</sup>H NMR (400 MHz, CDCl<sub>3</sub>) of **6a**

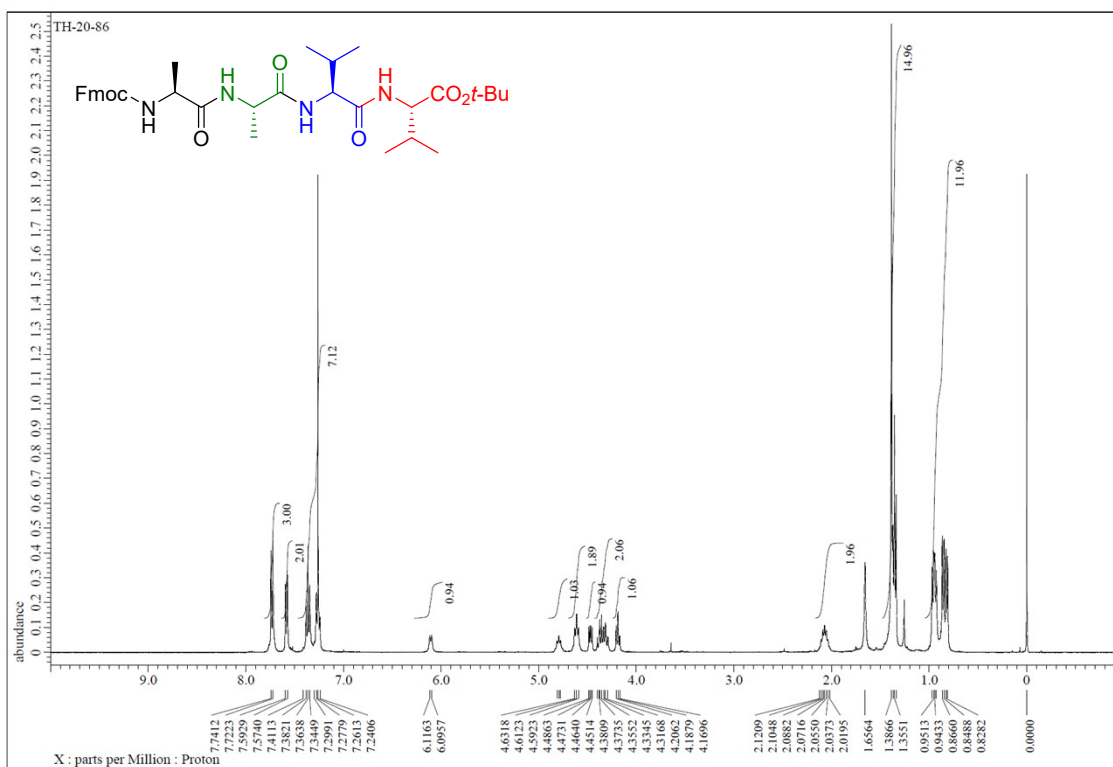

<sup>13</sup>C NMR (100 MHz, CDCl<sub>3</sub>) of **6a**

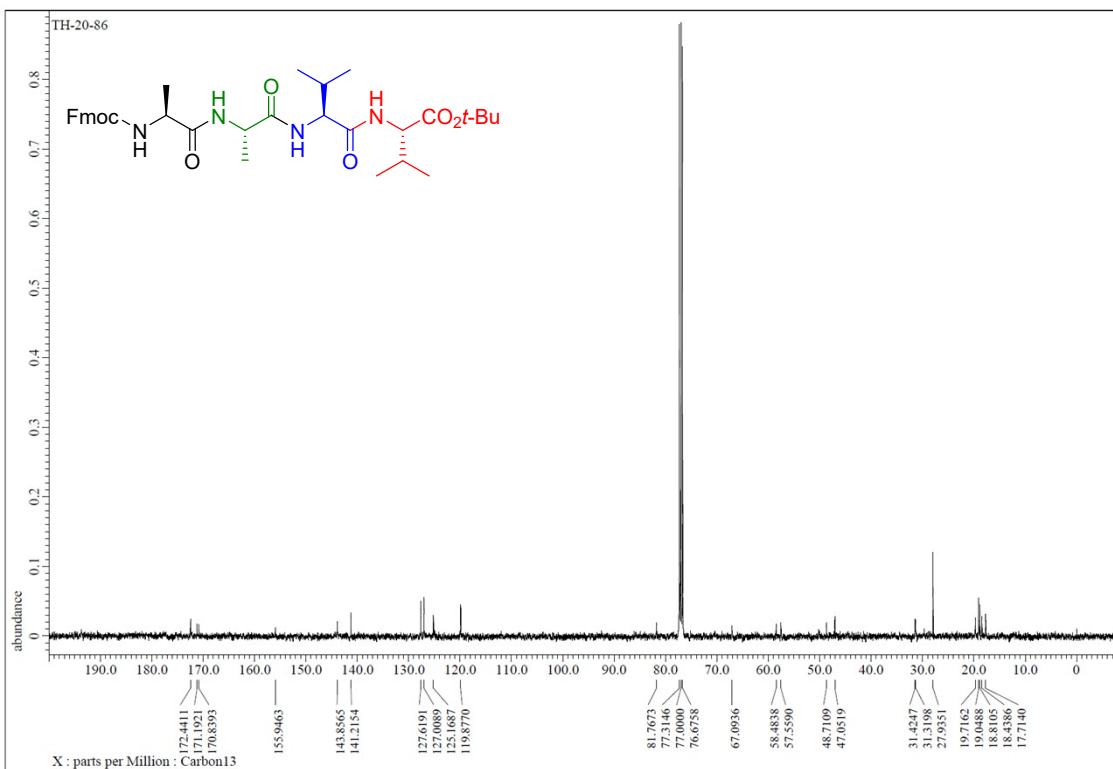

<sup>1</sup>H NMR (400 MHz, DMSO-d<sub>6</sub>) of **6b**

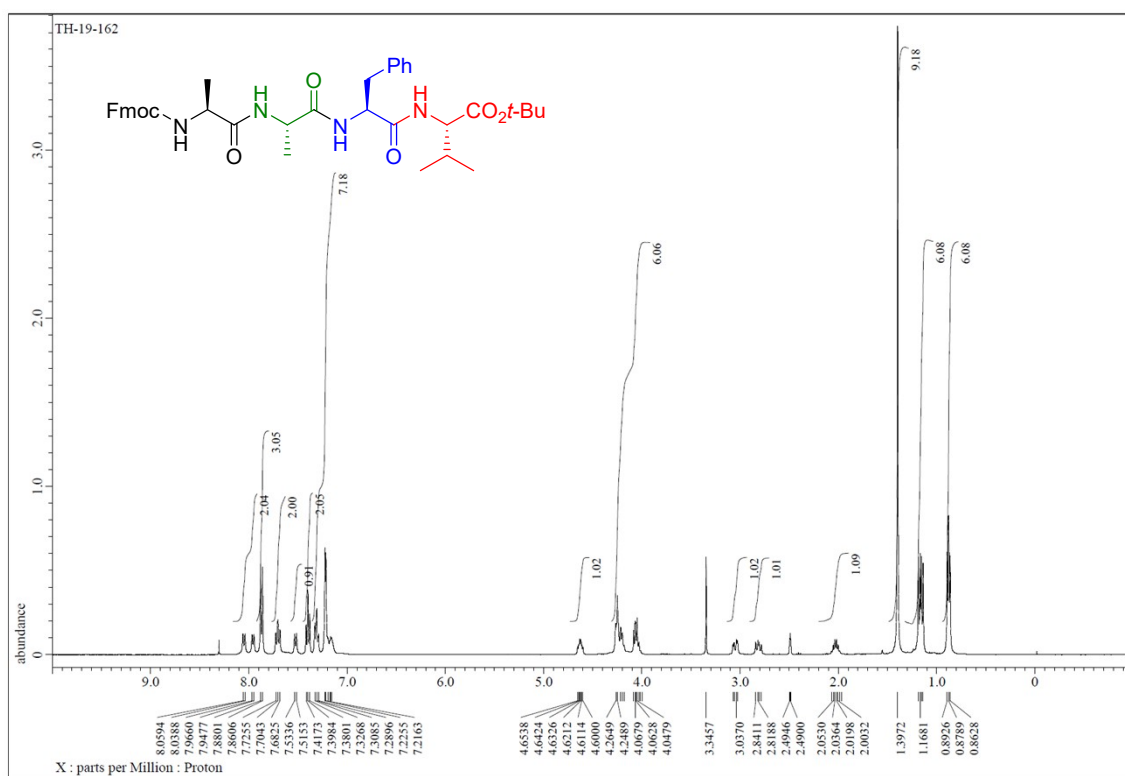

<sup>13</sup>C NMR (100 MHz, DMSO-d<sub>6</sub>) of **6b**

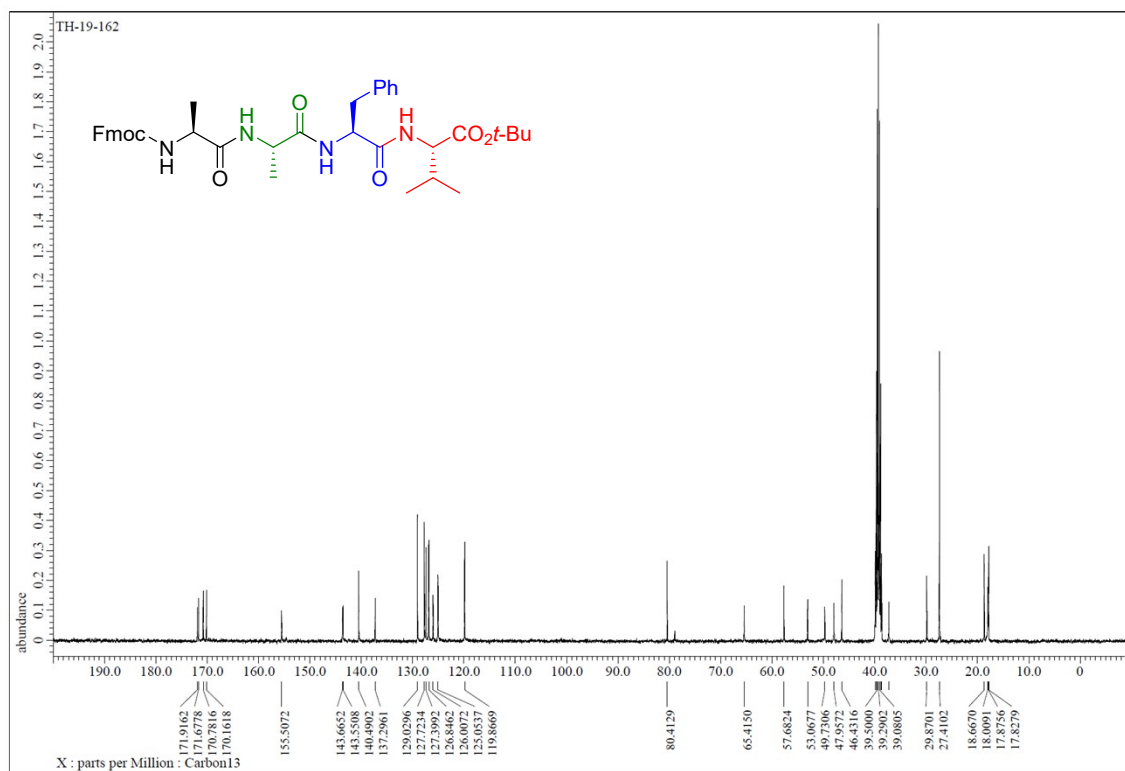

$^1\text{H}$  NMR (400 MHz,  $\text{DMSO-d}_6$ ) of **6c**

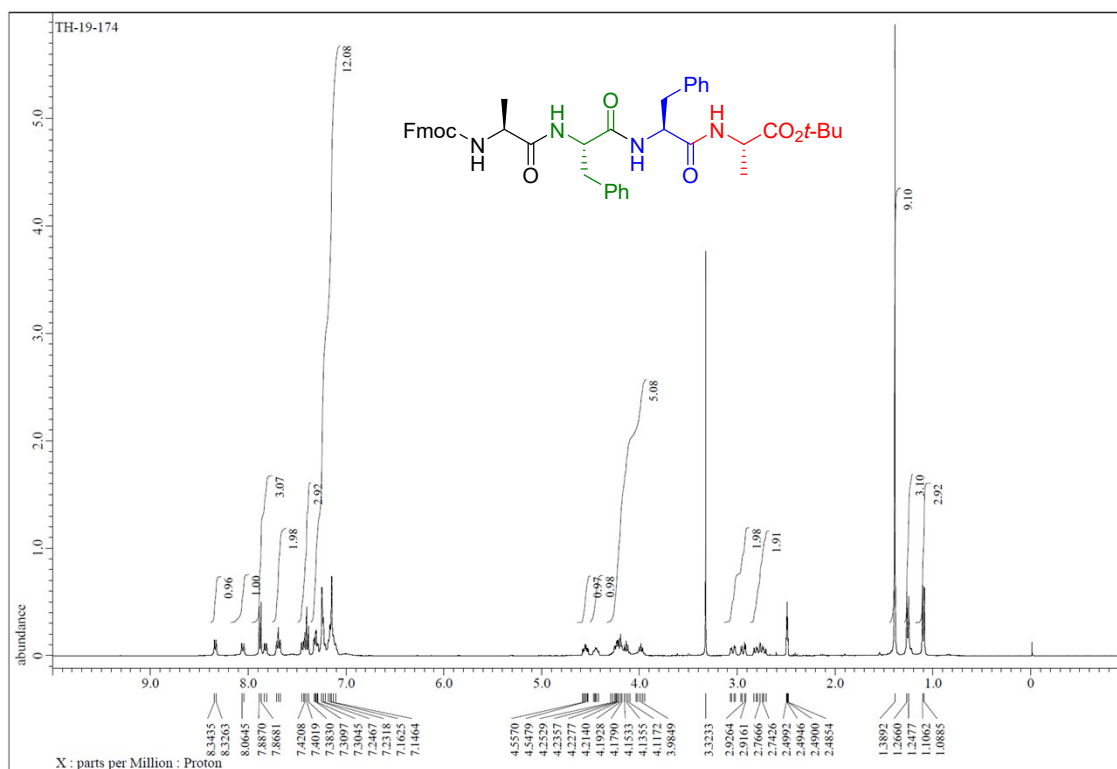

$^{13}\text{C}$  NMR (100 MHz,  $\text{DMSO-d}_6$ ) of **6c**

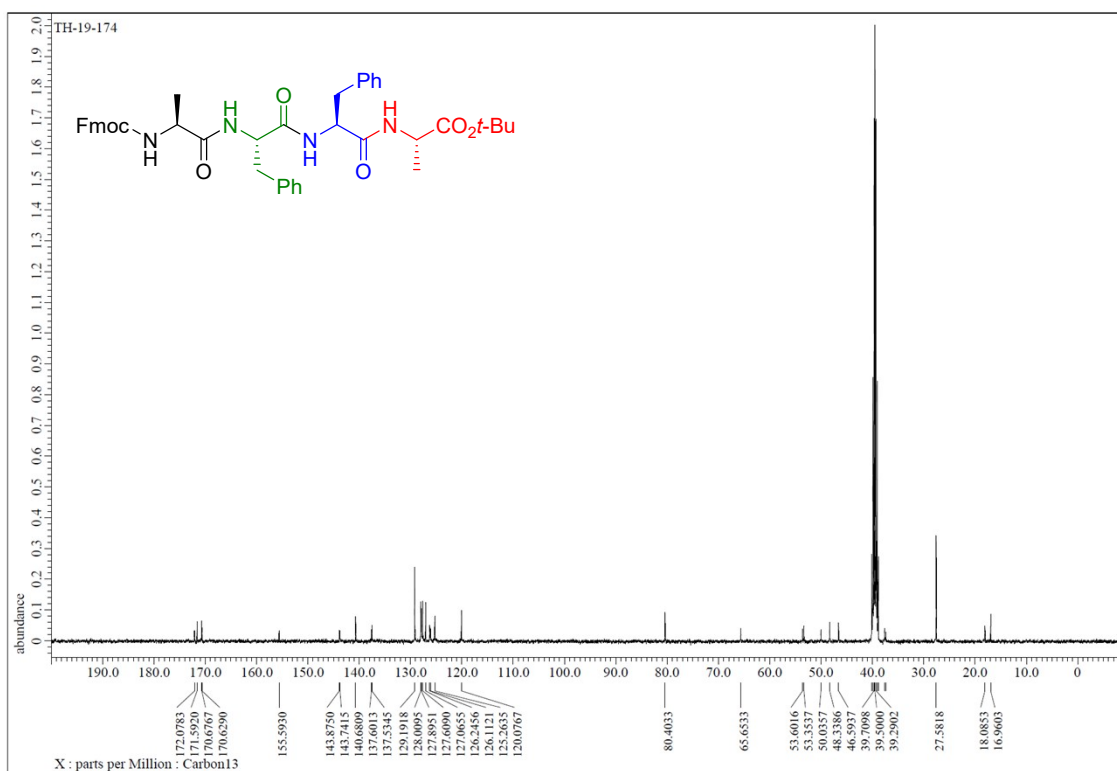

<sup>1</sup>H NMR (400 MHz, CDCl<sub>3</sub>) of **6d**

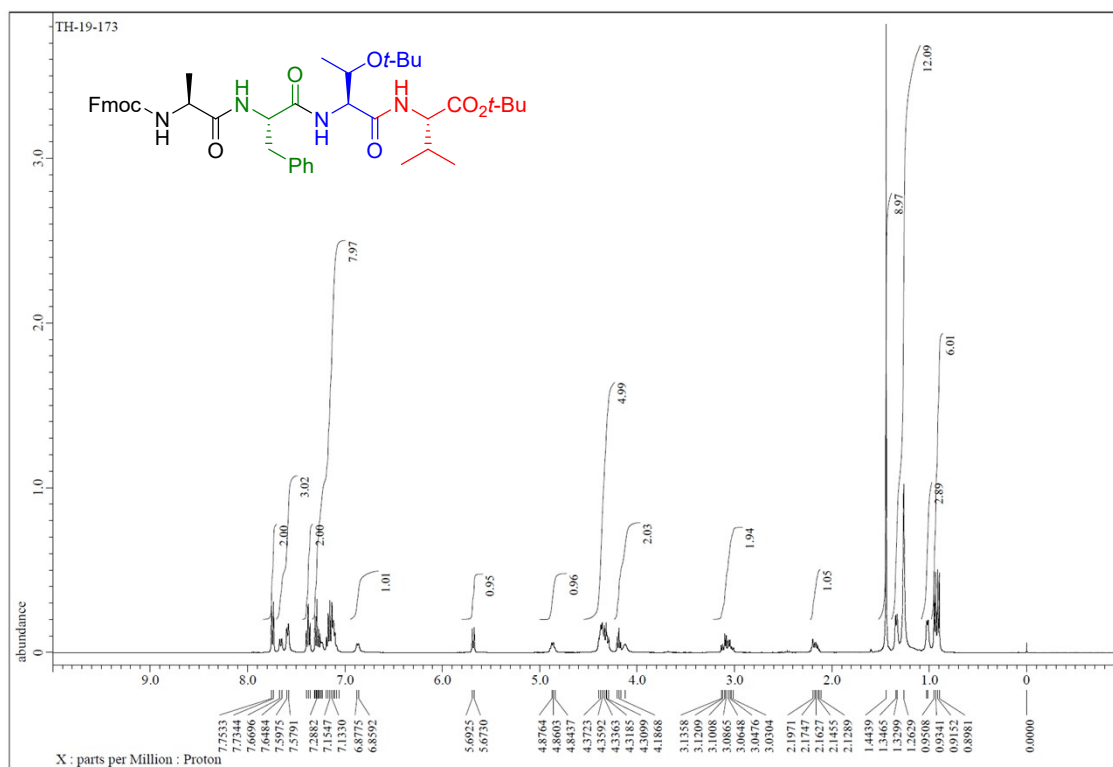

<sup>13</sup>C NMR (100 MHz, CDCl<sub>3</sub>) of **6d**

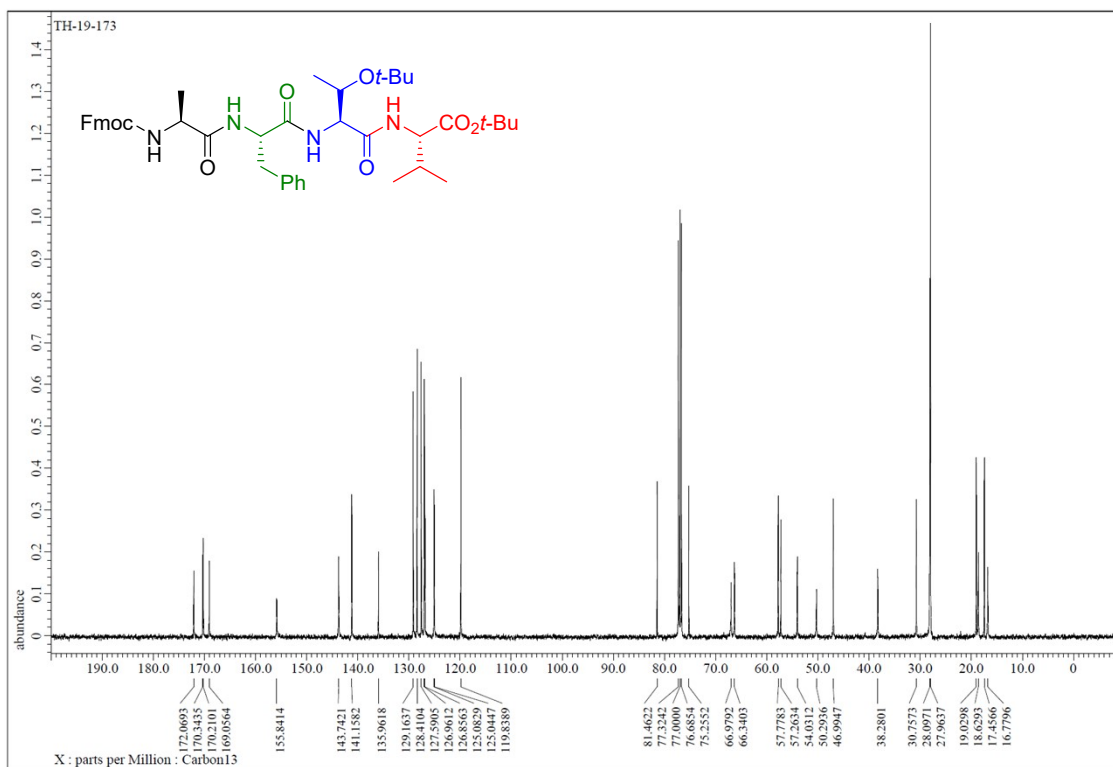

<sup>1</sup>H NMR (400 MHz, CDCl<sub>3</sub>) of **7a**

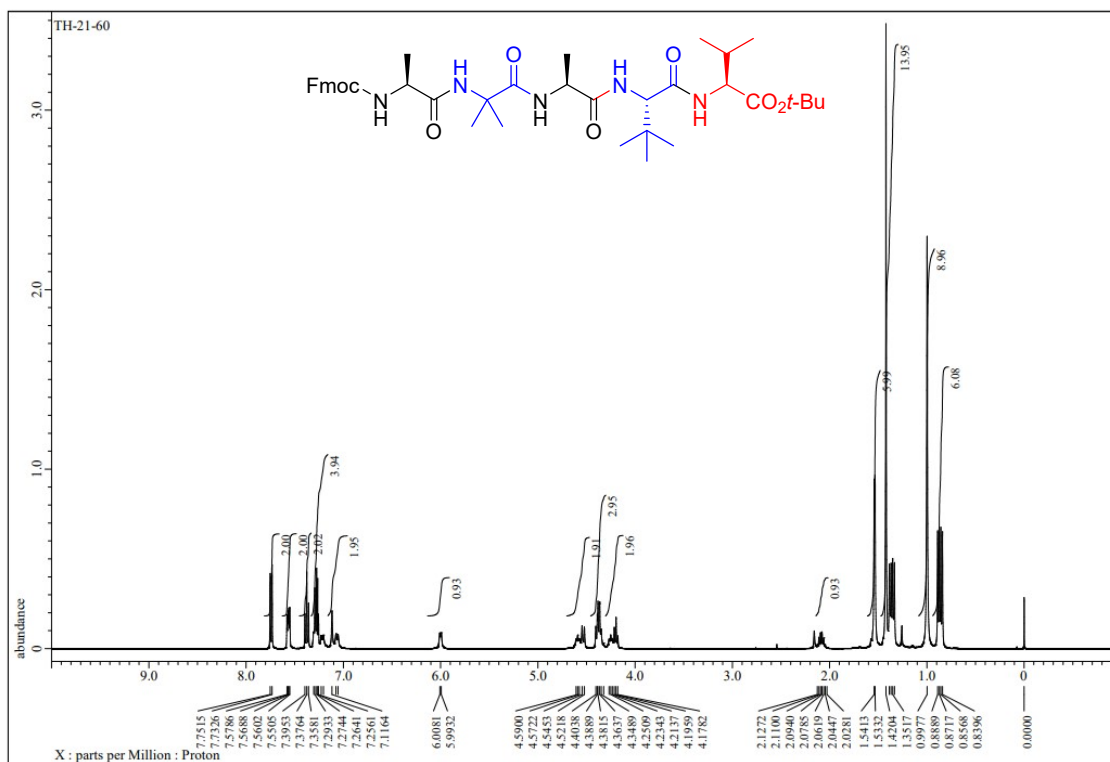

<sup>13</sup>C NMR (100 MHz, CDCl<sub>3</sub>) of **7a**

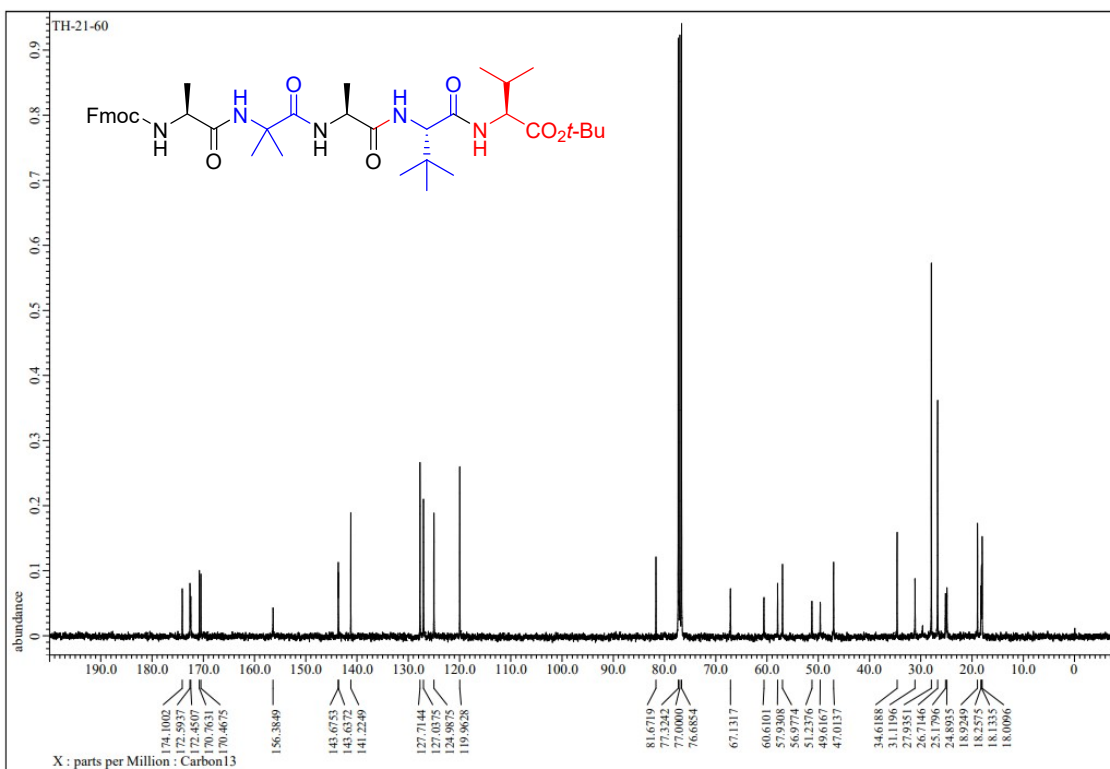

$^1\text{H}$  NMR (400 MHz,  $\text{CDCl}_3$ ) of **7b**

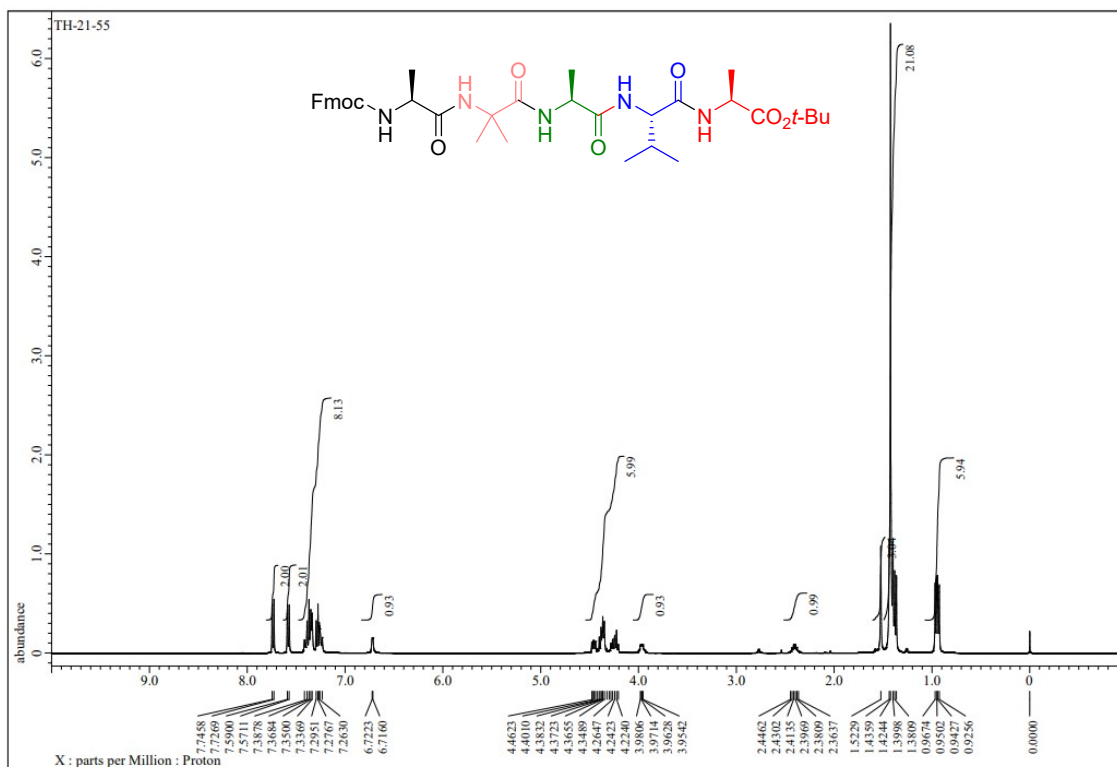

$^{13}\text{C}$  NMR (100 MHz,  $\text{CDCl}_3$ ) of **7b**

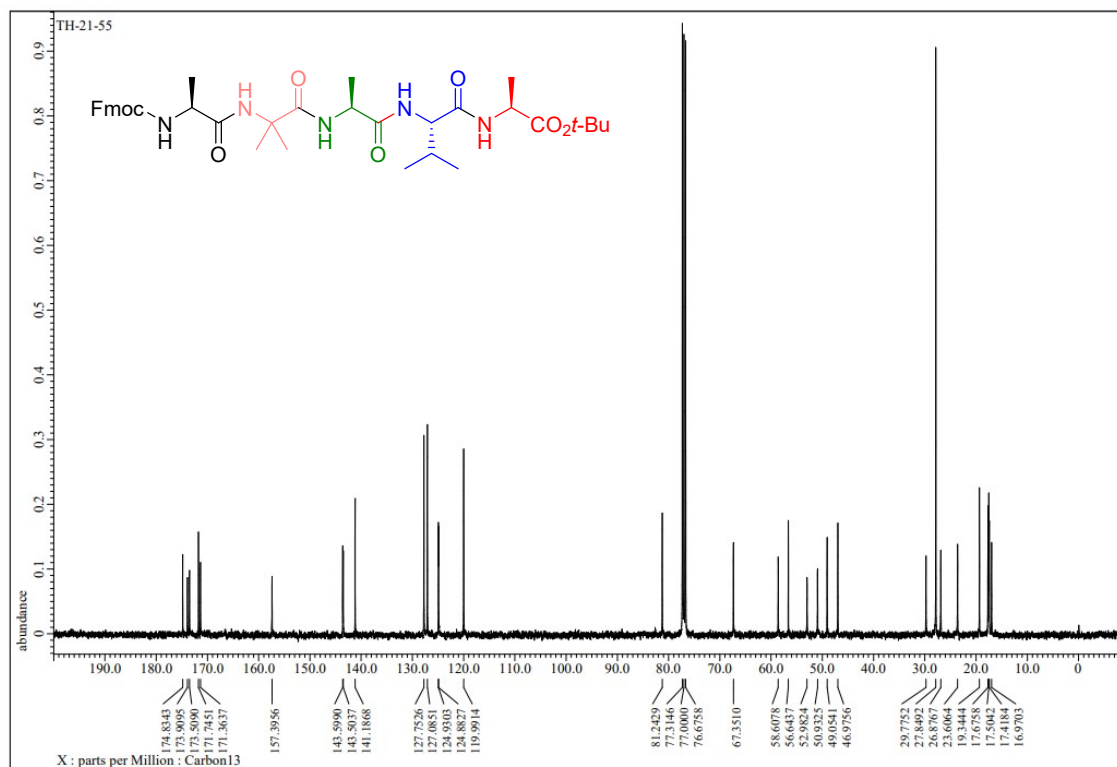



<sup>1</sup>H NMR (400 MHz, CDCl<sub>3</sub>) of 7c

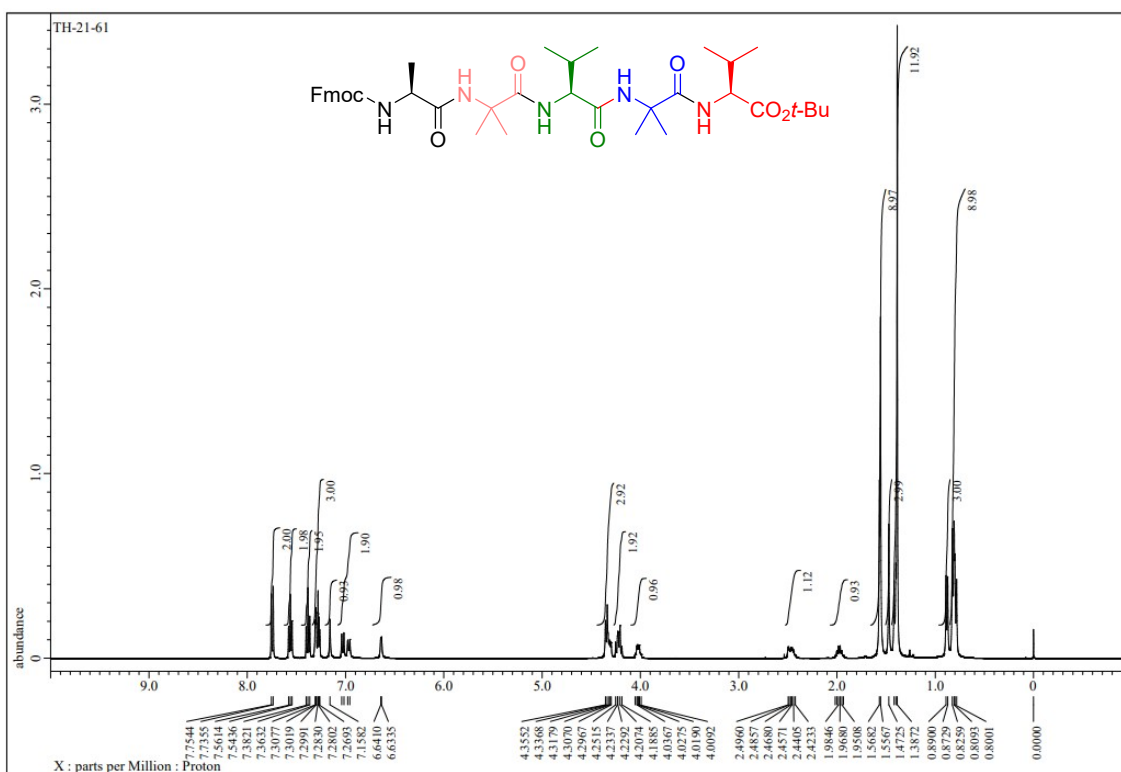

<sup>13</sup>C NMR (100 MHz, CDCl<sub>3</sub>) of 7c

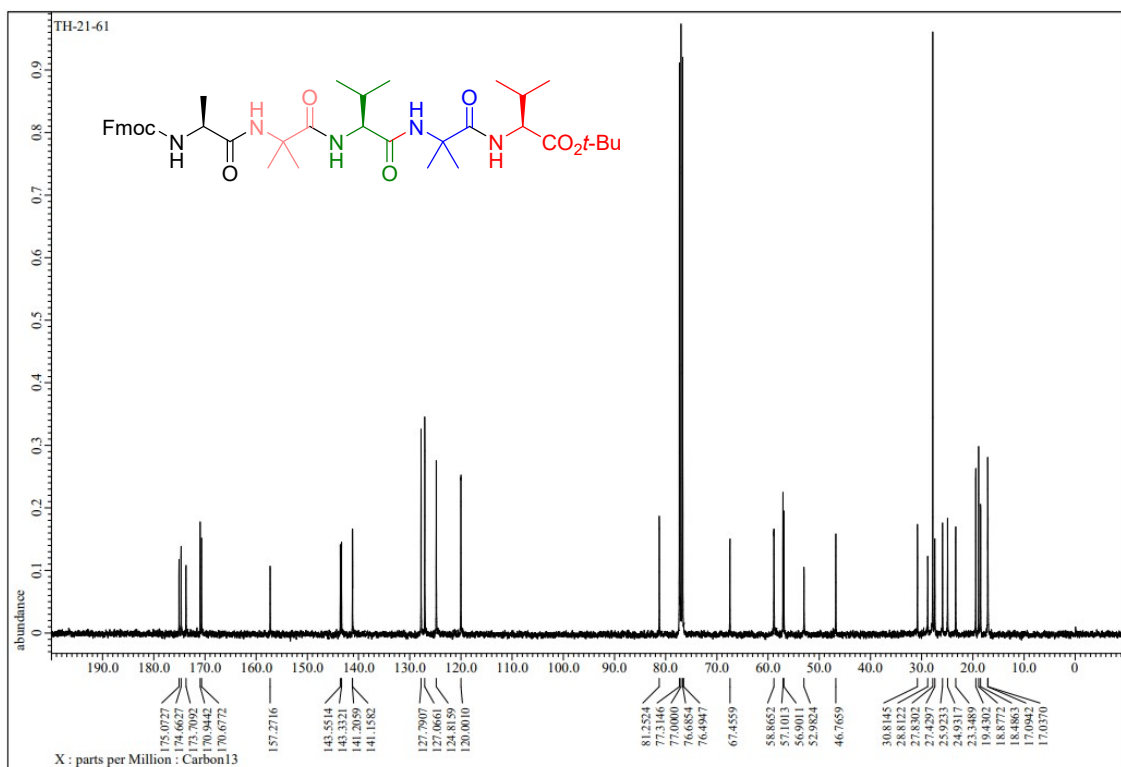

<sup>1</sup>H NMR (400 MHz, CDCl<sub>3</sub>) of 7d

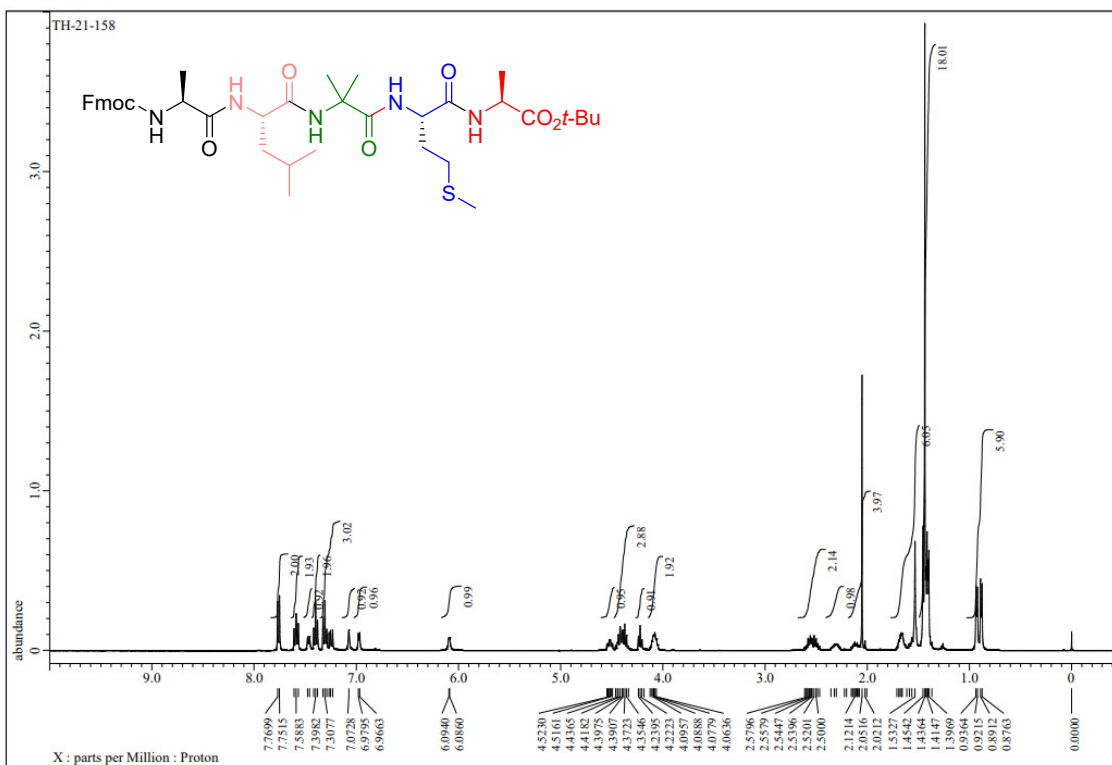

<sup>13</sup>C NMR (100 MHz, CDCl<sub>3</sub>) of 7d

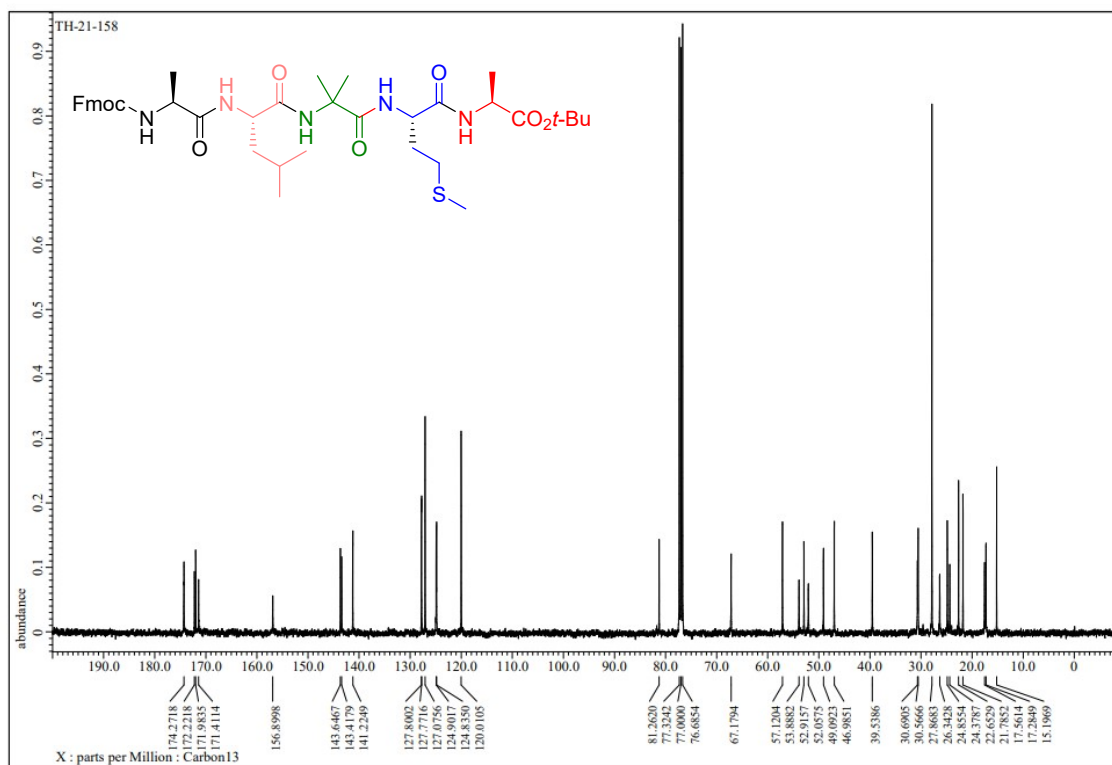

<sup>1</sup>H NMR (400 MHz, CDCl<sub>3</sub>) of 7e

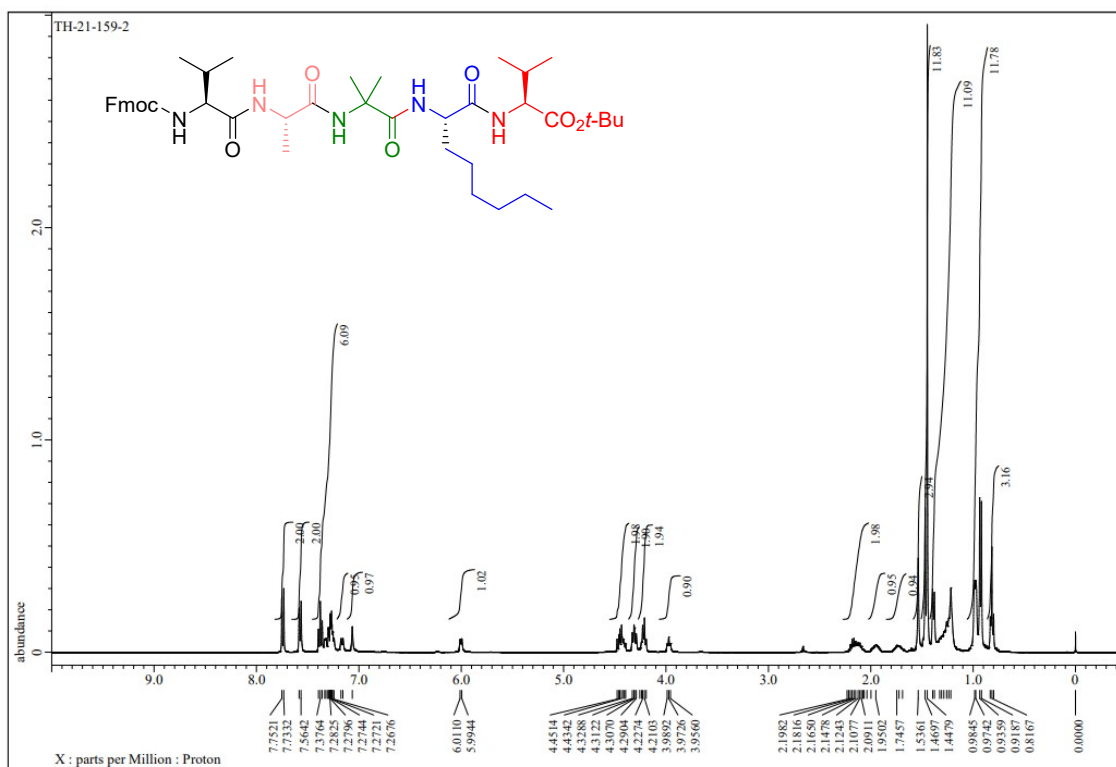

<sup>13</sup>C NMR (100 MHz, CDCl<sub>3</sub>) of 7e

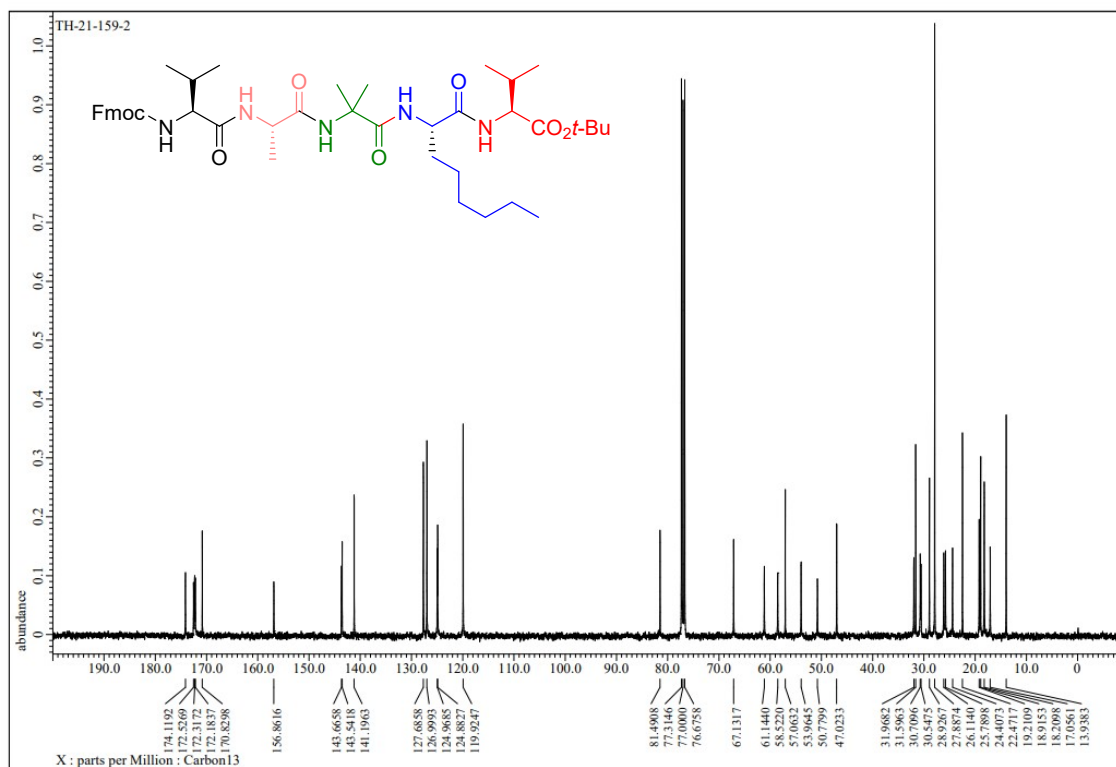

Supplement: d3sc00208j1.pdf [file d3sc00208j1.pdf]
